# Supplementary material for: Prototypical iron(ii) complex with 4-amino-1,2,4-triazole reinvestigated: an unexpected impact of water on spin transition
Source: Royal Society of Chemistry journal article supplement (doi:10.1039/c6cp06854e), 2017-01-01
Supplement: c6cp06854e1.pdf [file c6cp06854e1.pdf]

*Electronic Supplementary Information*

**Prototypical iron(II) complex with 4-amino-1,2,4-triazole reinvestigated: an unexpected impact of water on spin transition**

Mark B. Bushuev,<sup>\*a,b</sup> Denis P. Pishchur,<sup>a</sup> Ilya V. Korolkov<sup>a,b</sup> and Katerina A. Vinogradova<sup>a,b</sup>

<sup>a</sup>Nikolaev Institute of Inorganic Chemistry, Siberian Branch of Russian Academy of Sciences, 3, Acad. Lavrentiev Ave., Novosibirsk, 630090, Russia, E-mail: bushuev@niic.nsc.ru, mark.bushuev@gmail.com; Fax: +7 383 330 94 89; Tel: +7 383 316 51 43.

<sup>b</sup>Novosibirsk State University, 2, Pirogova str., Novosibirsk, 630090, Russia.

## Table of contents

|                                                                                                                                                                                                                                                                                                                  |     |
|------------------------------------------------------------------------------------------------------------------------------------------------------------------------------------------------------------------------------------------------------------------------------------------------------------------|-----|
| <b>Fig. S1</b> Quartz ampoules for magnetic measurements and crucibles for DSC.....                                                                                                                                                                                                                              | S3  |
| <b>Fig. S2</b> Water sorption curve for $\text{Fe}(\text{ATrz})_3(\text{NO}_3)_2 \cdot \text{H}_2\text{O}$ (the sample 3).....                                                                                                                                                                                   | S4  |
| <b>Fig. S3</b> Rate of water adsorption for $\text{Fe}(\text{ATrz})_3(\text{NO}_3)_2 \cdot \text{H}_2\text{O}$ .....                                                                                                                                                                                             | S4  |
| <b>Fig. S4</b> IR spectra of freshly prepared $\text{Fe}(\text{ATrz})_3(\text{NO}_3)_2 \cdot \text{H}_2\text{O}$ and aged<br>$\text{Fe}(\text{ATrz})_3(\text{NO}_3)_2 \cdot 0.5\text{H}_2\text{O}$ in fluorinated oil.....                                                                                       | S5  |
| <b>Fig. S5</b> IR spectrum of freshly prepared $\text{Fe}(\text{ATrz})_3(\text{NO}_3)_2 \cdot \text{H}_2\text{O}$ in KBr.....                                                                                                                                                                                    | S5  |
| <b>Fig. S6</b> Far IR spectra (in polyethylene) of freshly prepared $\text{Fe}(\text{ATrz})_3(\text{NO}_3)_2 \cdot \text{H}_2\text{O}$ and aged<br>$\text{Fe}(\text{ATrz})_3(\text{NO}_3)_2 \cdot 0.5\text{H}_2\text{O}$ after adsorbing 12.7 equiv. of $\text{H}_2\text{O}$ .....                               | S6  |
| <b>Fig. S7</b> X-ray powder patterns of freshly prepared $\text{Fe}(\text{ATrz})_3(\text{NO}_3)_2 \cdot \text{H}_2\text{O}$ and aged<br>$\text{Fe}(\text{ATrz})_3(\text{NO}_3)_2 \cdot 0.5\text{H}_2\text{O}$ and simulated pattern of $\text{Fe}(\text{ATrz})_3(\text{NO}_3)_2 \cdot 2\text{H}_2\text{O}$ ..... | S7  |
| <b>Fig. S8</b> X-ray powder patterns of aged $\text{Fe}(\text{ATrz})_3(\text{NO}_3)_2 \cdot 0.5\text{H}_2\text{O}$ after adsorption or addition<br>of various amount of $\text{H}_2\text{O}$ .....                                                                                                               | S7  |
| <b>Fig. S9</b> X-ray powder patterns of $\text{Fe}(\text{ATrz})_3(\text{NO}_3)_2 \cdot n\text{H}_2\text{O}$ ( $n = 3.6 - 16.6$ ).....                                                                                                                                                                            | S8  |
| <b>Fig. S10.</b> X-ray powder patterns of $\text{Fe}(\text{ATrz})_3(\text{NO}_3)_2 \cdot n\text{H}_2\text{O}$ ( $n = 0.5 - 1.60$ ) and<br>$\text{Fe}(\text{ATrz})_3(\text{NO}_3)_2$ .....                                                                                                                        | S8  |
| <b>Fig. S11</b> SEM images of the phase $\text{Fe}(\text{ATrz})_3(\text{NO}_3)_2 \cdot \text{H}_2\text{O}$ .....                                                                                                                                                                                                 | S9  |
| <b>Fig. S12</b> Thermal cycles for $\text{Fe}(\text{ATrz})_3(\text{NO}_3)_2 \cdot 3.6\text{H}_2\text{O}$ (the sample 4).....                                                                                                                                                                                     | S10 |
| <b>Fig. S13</b> Thermal cycles for $\text{Fe}(\text{ATrz})_3(\text{NO}_3)_2 \cdot 5.8\text{H}_2\text{O}$ (the sample 5).....                                                                                                                                                                                     | S10 |
| <b>Fig. S14</b> Thermal cycles for $\text{Fe}(\text{ATrz})_3(\text{NO}_3)_2 \cdot 16.6\text{H}_2\text{O}$ (the sample 7).....                                                                                                                                                                                    | S11 |
| <b>Fig. S15</b> Thermal cycles for $\text{Fe}(\text{ATrz})_3(\text{NO}_3)_2 \cdot 0.5\text{H}_2\text{O}$ (the sample 8).....                                                                                                                                                                                     | S11 |
| Details of fitting.....                                                                                                                                                                                                                                                                                          | S12 |
| <b>Fig. S16</b> Kinetic curves for the sample 1.....                                                                                                                                                                                                                                                             | S15 |
| <b>Fig. S17</b> Kinetic curves for the sample 2.....                                                                                                                                                                                                                                                             | S15 |
| <b>Fig. S18</b> Kinetic curves for the sample 3 and sample 4.....                                                                                                                                                                                                                                                | S15 |
| <b>Fig. S19</b> Kinetic curves for the sample 4 and the sample 9.....                                                                                                                                                                                                                                            | S16 |
| <b>Table S1</b> Kinetic parameters .....                                                                                                                                                                                                                                                                         | S17 |
| <b>Fig. S20</b> The sample 10: comparison of the first cycle and the tenth cycle.....                                                                                                                                                                                                                            | S18 |
| <b>Fig. S21</b> The sample 11: comparison of the first cycle and the tenth cycle.....                                                                                                                                                                                                                            | S18 |
| <b>Fig. S22</b> The sample 12: comparison of the first cycle and the tenth cycle.....                                                                                                                                                                                                                            | S18 |
| <b>Fig. S23</b> The sample 13: comparison of the first cycle and the tenth cycle.....                                                                                                                                                                                                                            | S18 |
| <b>Table S2</b> Magnetochemical data for the samples 1 – 9.....                                                                                                                                                                                                                                                  | S19 |
| <b>Table S3</b> DSC data for the samples 10 – 20.....                                                                                                                                                                                                                                                            | S20 |
| <b>Fig S24</b> The $\ln A - E_a$ compensation for the CnB and Fn models.....                                                                                                                                                                                                                                     | S22 |
| <b>Table S4</b> The $C_p$ values for the anhydrous complex $\text{Fe}(\text{ATrz})_3(\text{NO}_3)_2$ .....                                                                                                                                                                                                       | S23 |
| On determining the onset temperature of spin transition.....                                                                                                                                                                                                                                                     | S24 |
| On estimating entropies of spin transition.....                                                                                                                                                                                                                                                                  | S25 |
| On fitting the DSC curves.....                                                                                                                                                                                                                                                                                   | S26 |
| Estimates of kinetic parameters (DSC data. CnB).....                                                                                                                                                                                                                                                             | S27 |
| Estimates of kinetic parameters (DSC data. Fn).....                                                                                                                                                                                                                                                              | S27 |

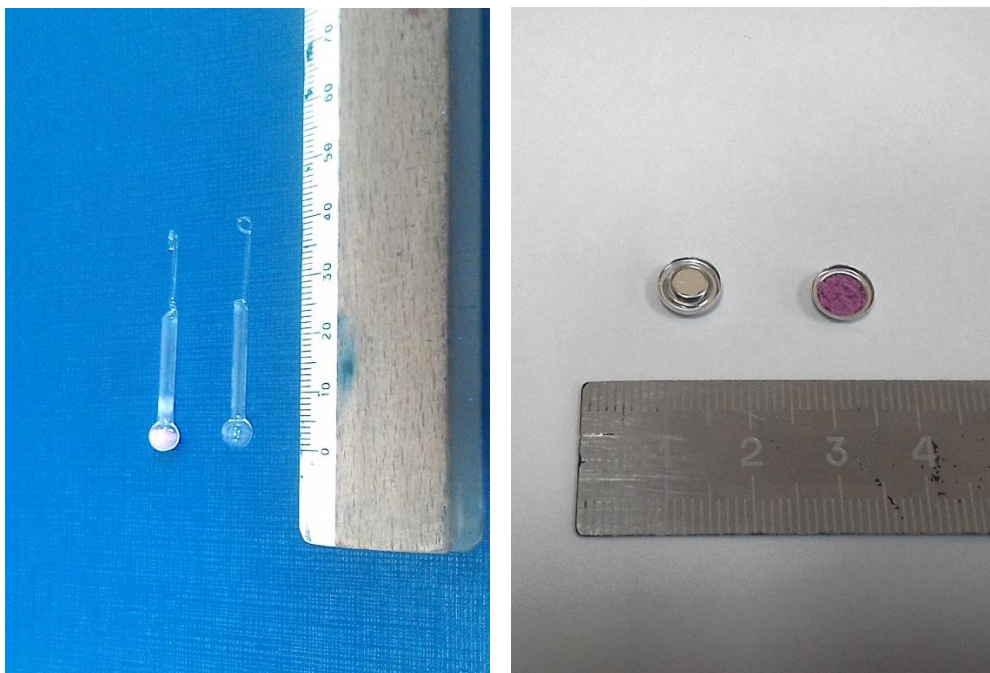

**Fig. S1** Quartz ampoules for magnetic measurements (left) and crucibles for DSC (right). Ampoules: sealed ampoule with the sample and a non-sealed free ampoule are shown. Crucibles: sealed crucible and an open crucible with the sample.

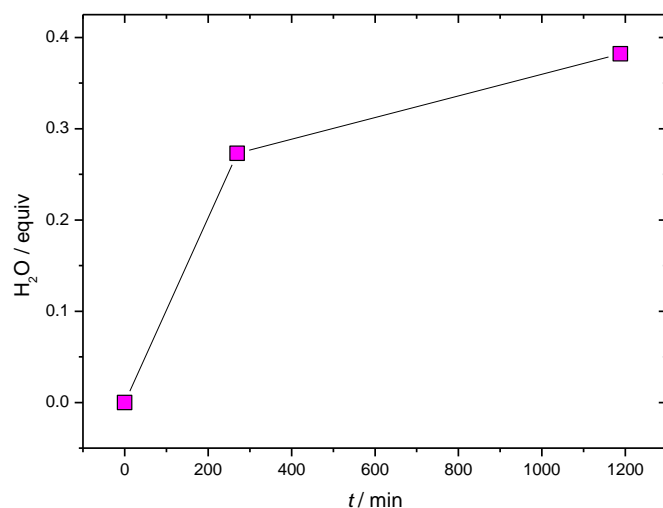

**Fig. S2** Water sorption curve for  $\text{Fe(ATrz)}_3(\text{NO}_3)_2 \cdot \text{H}_2\text{O}$  (the sample **3**). The sample **3** was placed into a quartz ampoule and exposed to water vapor for 20 h (mass increase 1.5 %, 0.37 equiv. of  $\text{H}_2\text{O}$ ). Increase in the mass of this sample was monitored by weighing the ampoule with the sample.

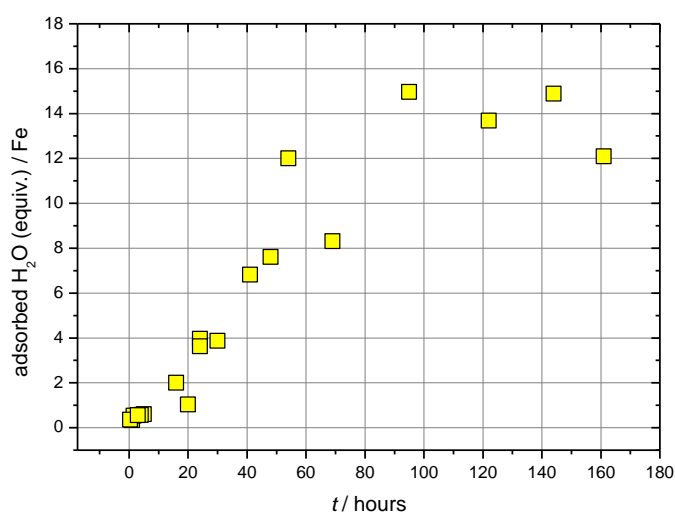

**Fig. S3** Rate of water adsorption for aged  $\text{Fe(ATrz)}_3(\text{NO}_3)_2 \cdot 0.5\text{H}_2\text{O}$ . The samples were placed into DSC crucibles and exposed to water vapor. Every point corresponds to a separate sample. Increase in the mass of the samples was monitored by weighing.

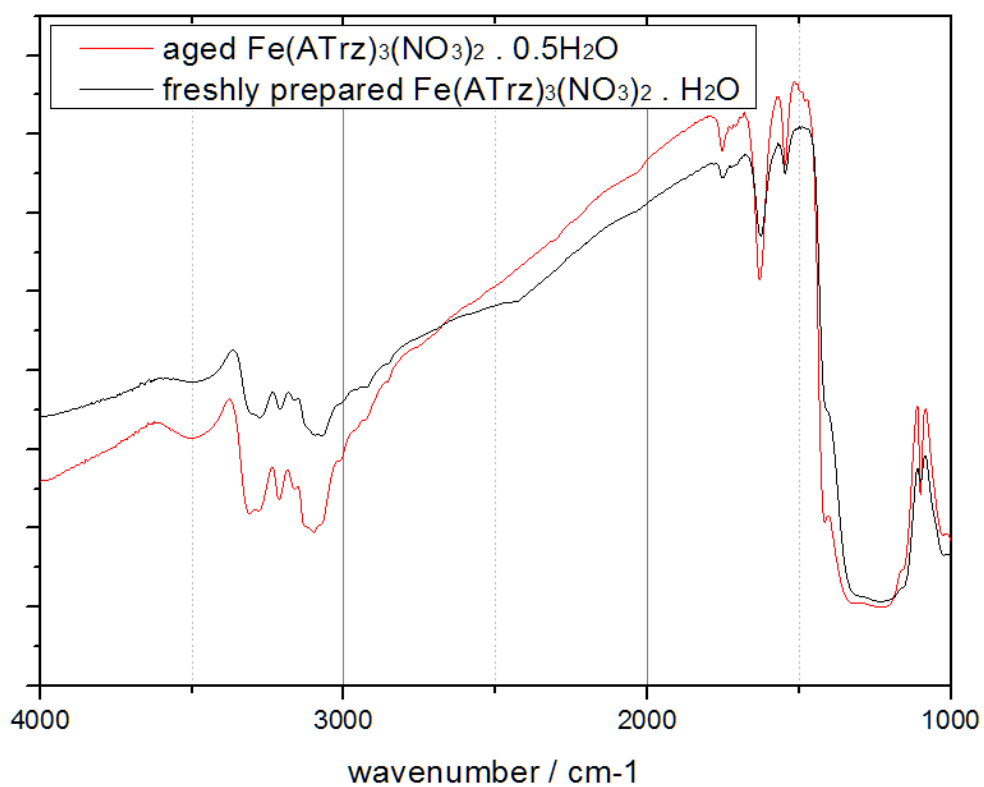

**Fig. S4** IR spectra of freshly prepared Fe(ATrz)<sub>3</sub>(NO<sub>3</sub>)<sub>2</sub>·H<sub>2</sub>O and aged Fe(ATrz)<sub>3</sub>(NO<sub>3</sub>)<sub>2</sub>·0.5H<sub>2</sub>O in fluorinated oil.

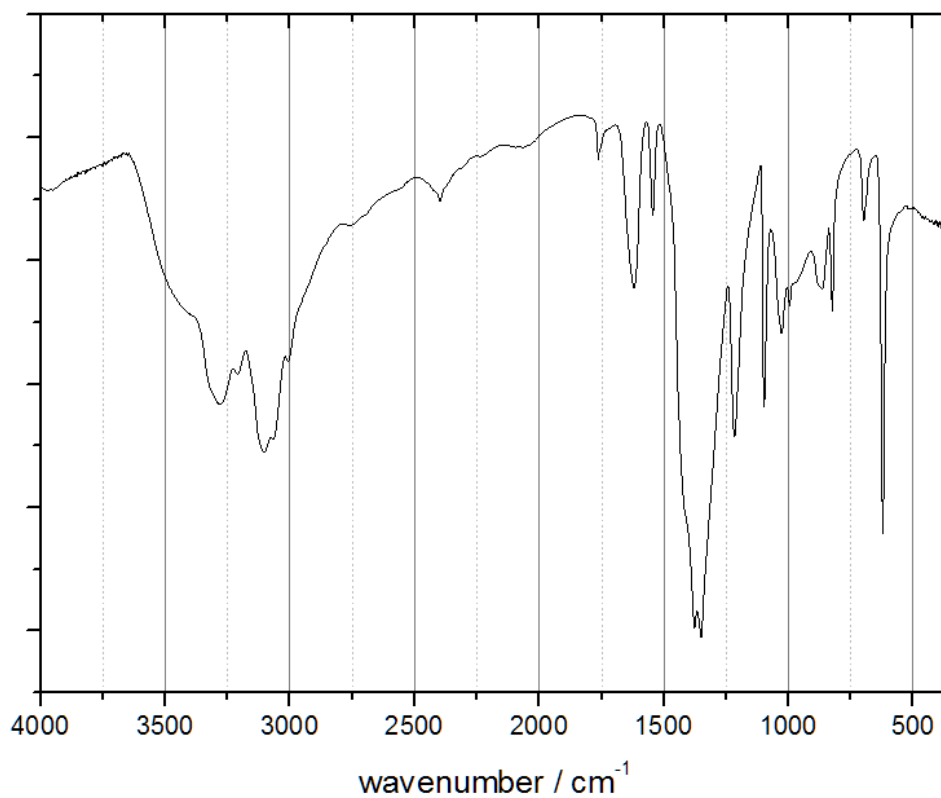

**Fig. S5** IR spectrum of freshly prepared Fe(ATrz)<sub>3</sub>(NO<sub>3</sub>)<sub>2</sub>·H<sub>2</sub>O in KBr.

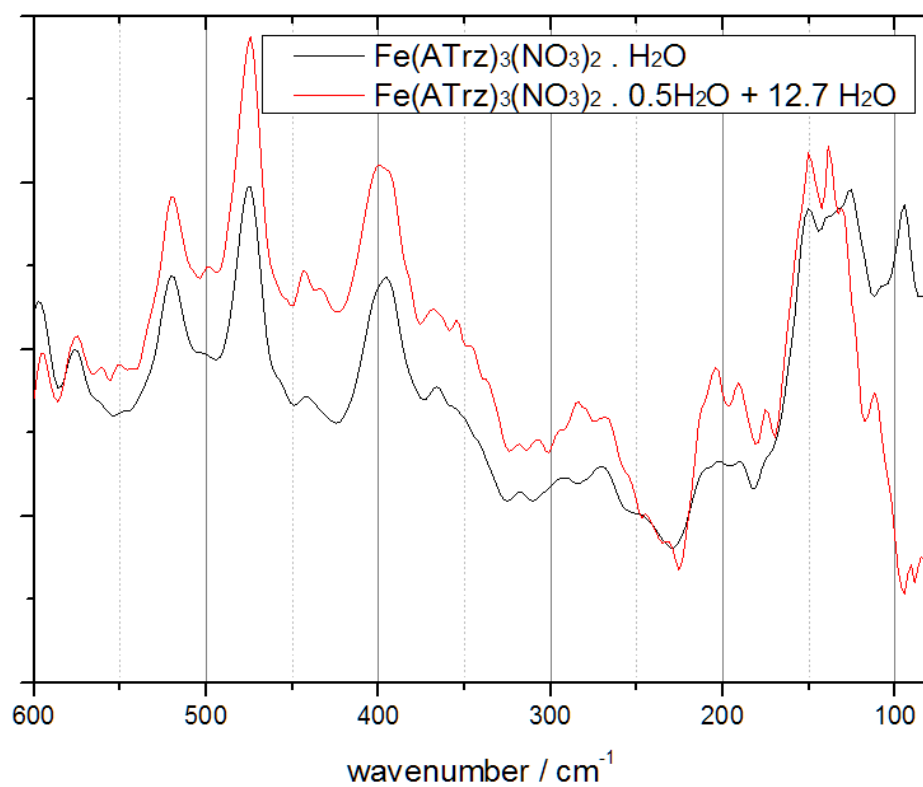

**Fig. S6** Far IR spectra (in polyethylene) of freshly prepared Fe(ATrz)<sub>3</sub>(NO<sub>3</sub>)<sub>2</sub>·H<sub>2</sub>O and aged Fe(ATrz)<sub>3</sub>(NO<sub>3</sub>)<sub>2</sub>·0.5H<sub>2</sub>O after adsorbing 12.7 equiv. of H<sub>2</sub>O.

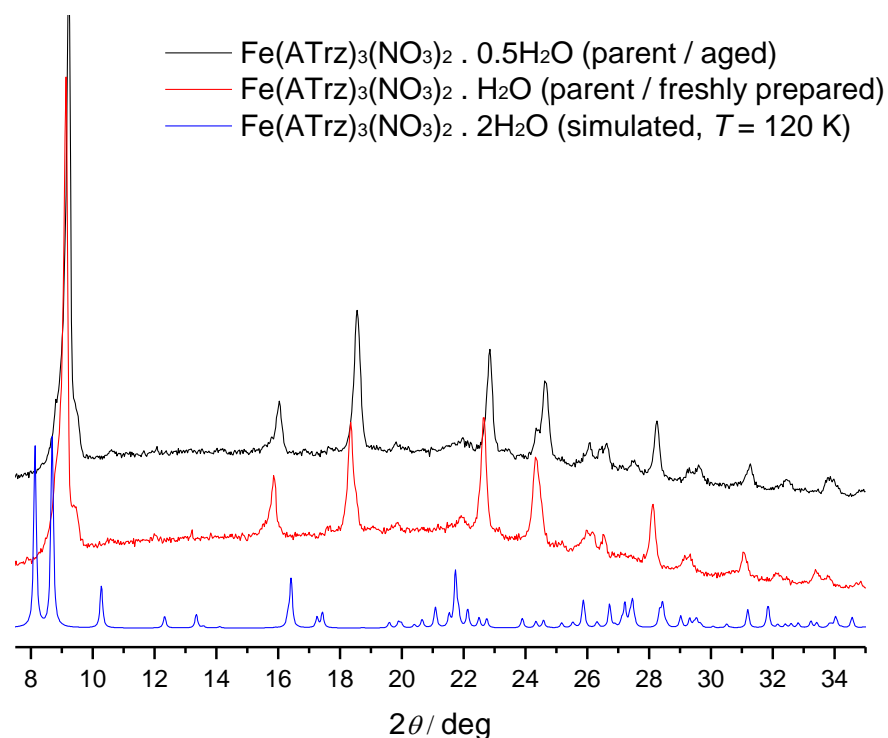

**Fig. S7** X-ray powder patterns of freshly prepared  $\text{Fe(ATrz)}_3(\text{NO}_3)_2 \cdot \text{H}_2\text{O}$  and aged  $\text{Fe(ATrz)}_3(\text{NO}_3)_2 \cdot 0.5\text{H}_2\text{O}$  and simulated pattern of  $\text{Fe(ATrz)}_3(\text{NO}_3)_2 \cdot 2\text{H}_2\text{O}$ .

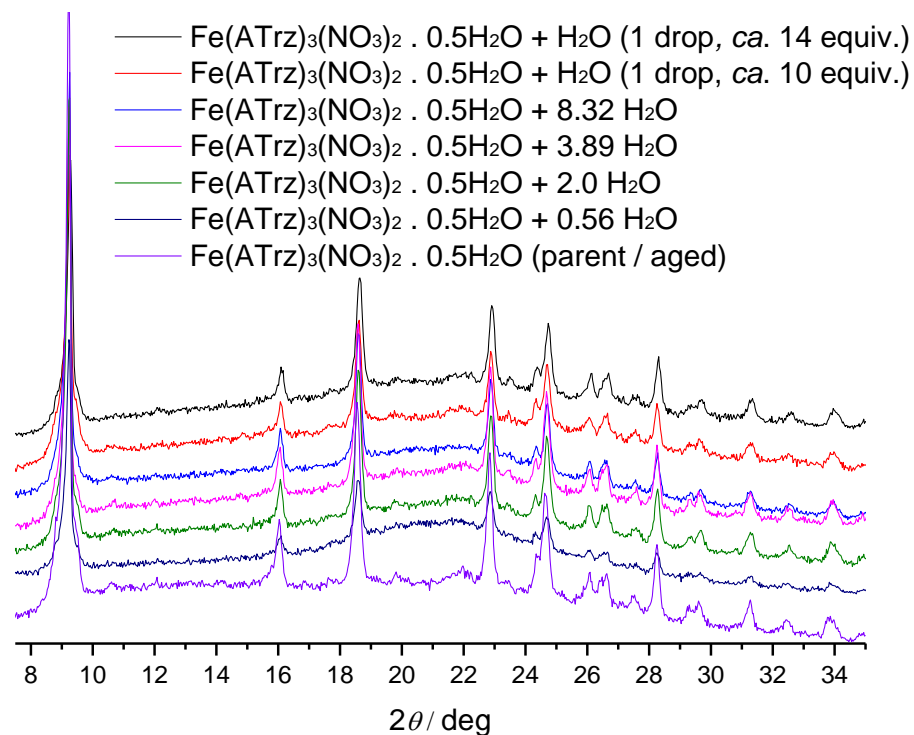

**Fig. S8** X-ray powder patterns of aged  $\text{Fe(ATrz)}_3(\text{NO}_3)_2 \cdot 0.5\text{H}_2\text{O}$  after adsorption or addition of various amount of  $\text{H}_2\text{O}$ .

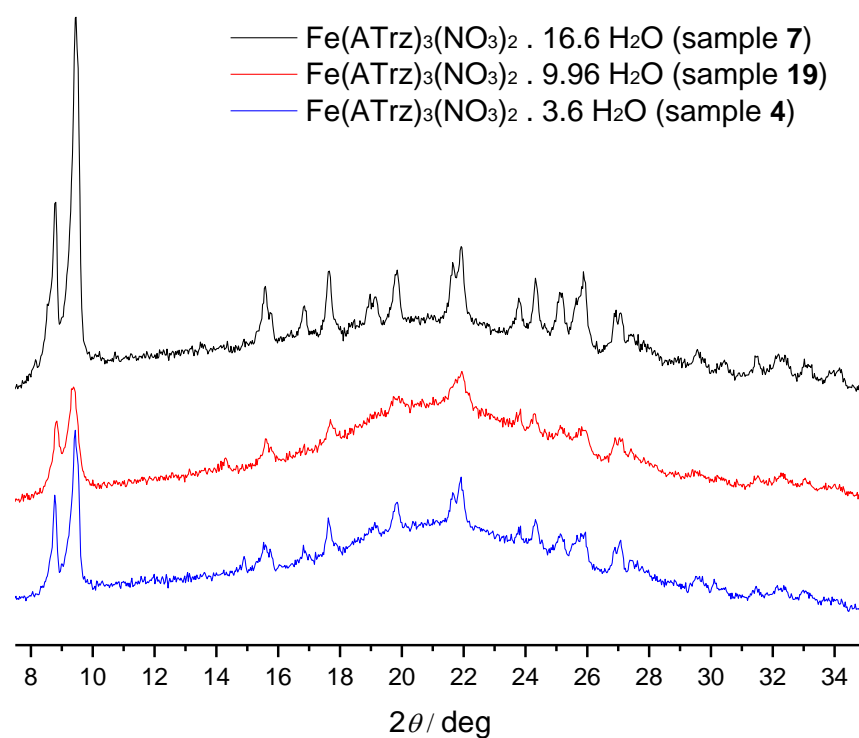

**Fig. S9** X-ray powder patterns of  $\text{Fe(ATrz)}_3(\text{NO}_3)_2 \cdot n\text{H}_2\text{O}$  ( $n = 3.6 - 16.6$ ).

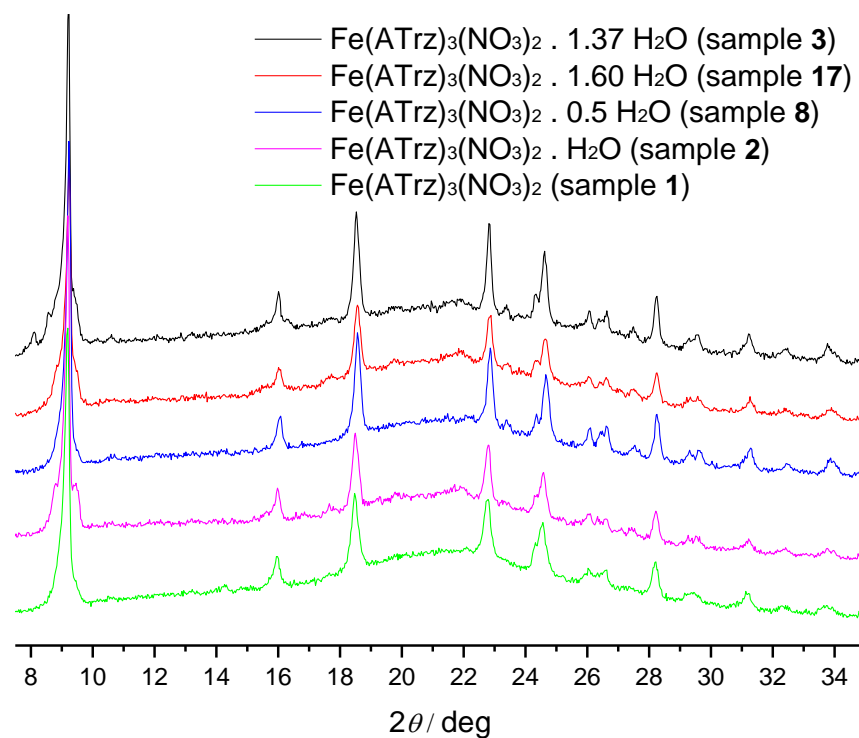

**Fig. S10** X-ray powder patterns of  $\text{Fe(ATrz)}_3(\text{NO}_3)_2 \cdot n\text{H}_2\text{O}$  ( $n = 0.5 - 1.60$ ) and  $\text{Fe(ATrz)}_3(\text{NO}_3)_2$ .

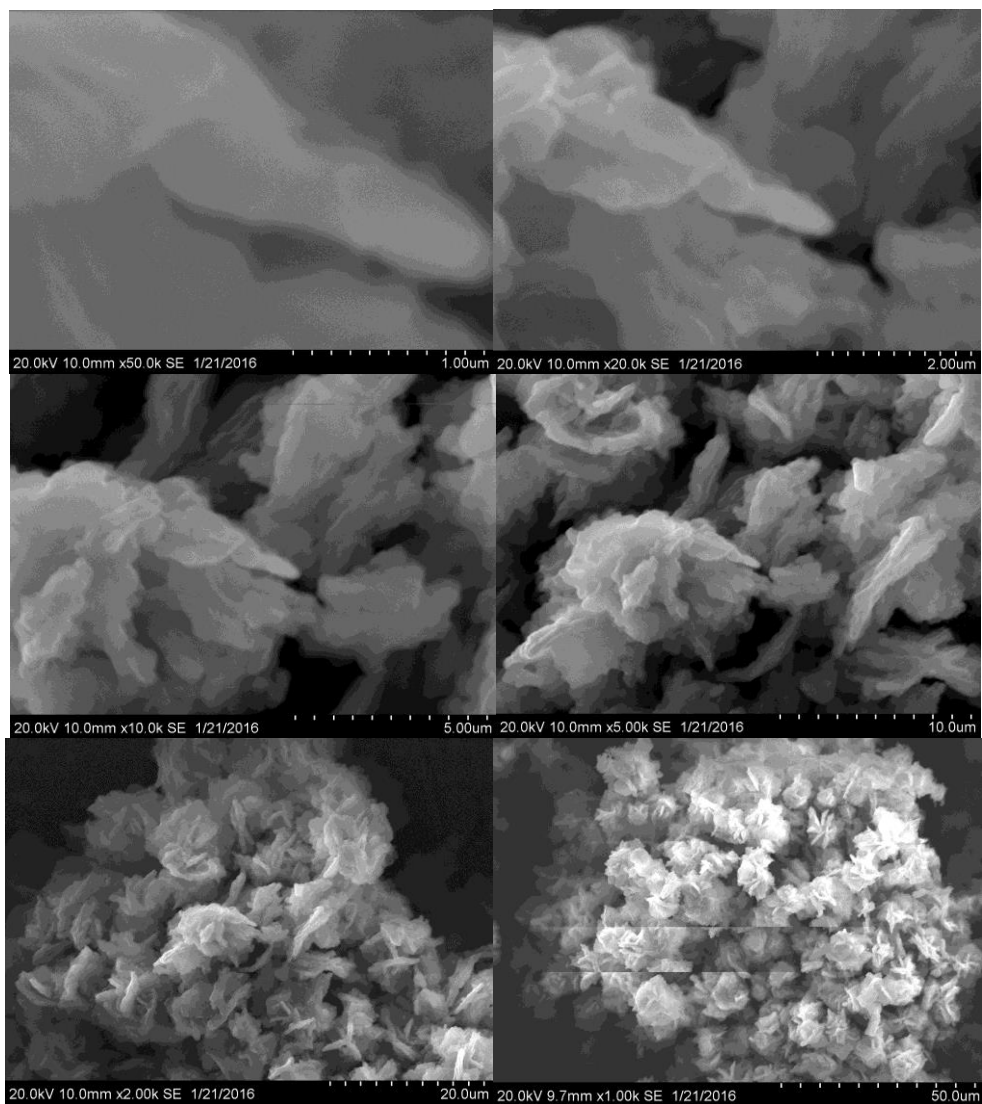

**Fig. S11** SEM images of the phase  $\text{Fe(ATrz)}_3(\text{NO}_3)_2 \cdot \text{H}_2\text{O}$ .

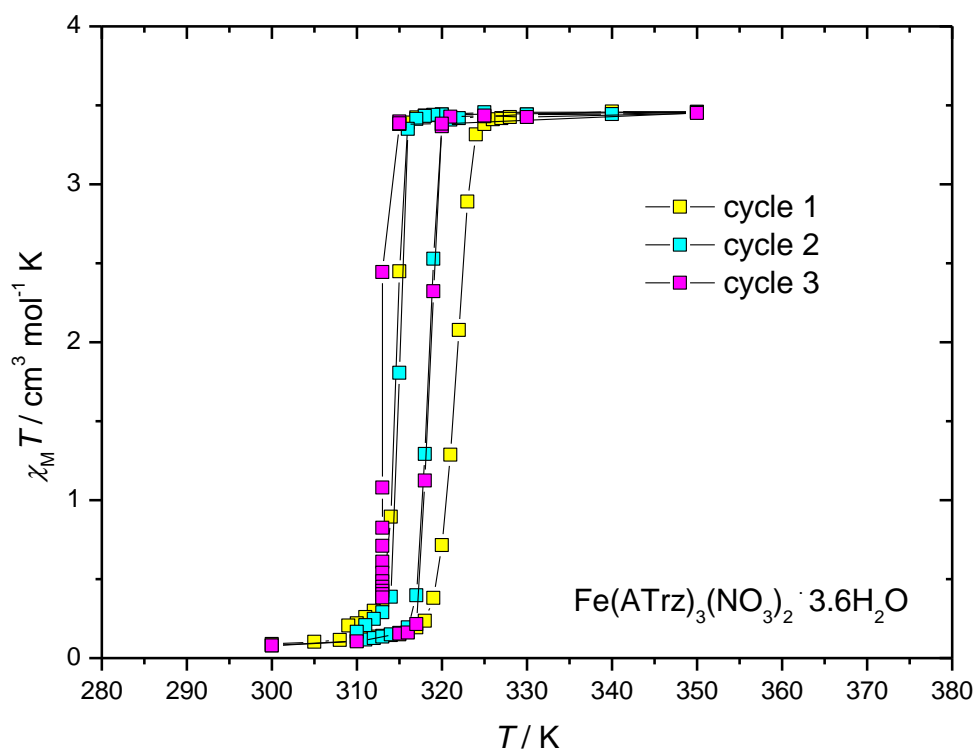

**Fig. S12** Thermal cycles for  $\text{Fe(ATrz)}_3(\text{NO}_3)_2 \cdot 3.6\text{H}_2\text{O}$  (the sample 4).

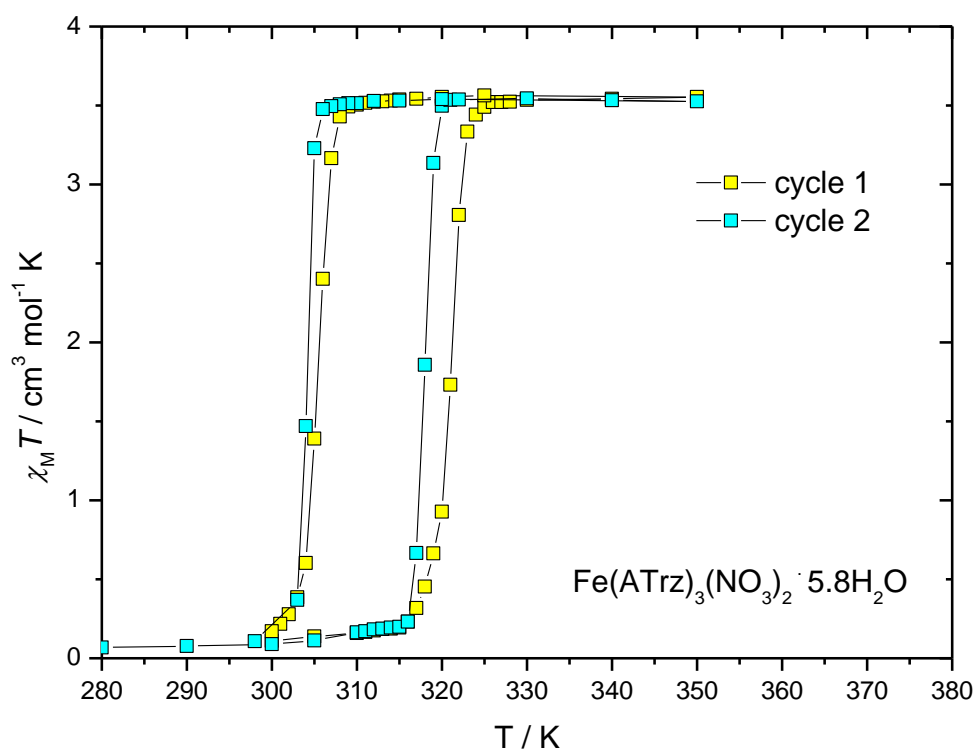

**Fig. S13** Thermal cycles for  $\text{Fe(ATrz)}_3(\text{NO}_3)_2 \cdot 5.8\text{H}_2\text{O}$  (the sample 5).

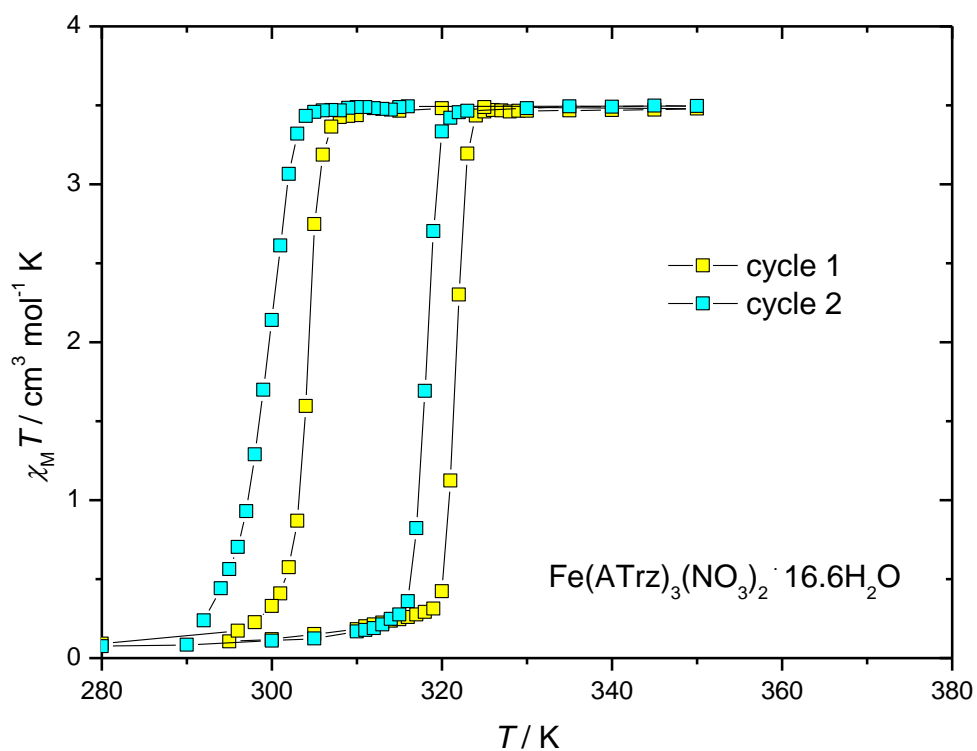

**Fig. S14** Thermal cycles for  $\text{Fe(ATrz)}_3(\text{NO}_3)_2 \cdot 16.6\text{H}_2\text{O}$  (the sample 7).

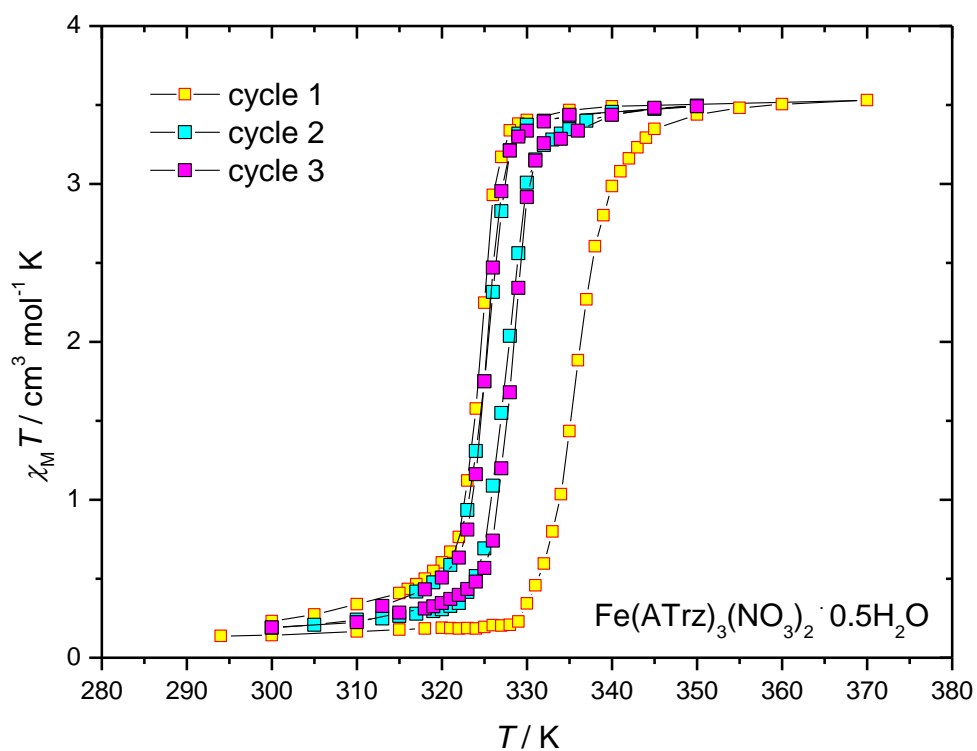

**Fig. S15** Thermal cycles for  $\text{Fe(ATrz)}_3(\text{NO}_3)_2 \cdot 0.5\text{H}_2\text{O}$  (the sample 8).

## Kinetic curves: fitting

Kinetics curves are shown in Figs. S16–S19 and results of fitting are collected in Table S1.

Fitting of exponential curves has been done in the frame of mono-, bi- or tri-exponential approximations using following equations.

### (1) Monoexponential approximation

(1a) Monoexponential decay

$$\begin{aligned}\chi_M T &= [(\chi_M T)_{max} - (\chi_M T)_{min}]e^{(-\frac{t}{\tau_1})} + (\chi_M T)_{min} \\ &= [(\chi_M T)_{max} - (\chi_M T)_{min}]e^{(-k_1 t)} + (\chi_M T)_{min},\end{aligned}$$

(1b) Monoexponential decelerating growth

$$\begin{aligned}\chi_M T &= [(\chi_M T)_{min} - (\chi_M T)_{max}]e^{(-\frac{t}{\tau_1})} + (\chi_M T)_{max} \\ &= [(\chi_M T)_{max} - (\chi_M T)_{min}]e^{(-k_1 t)} + (\chi_M T)_{max}\end{aligned}$$

These equations can be rewritten as

$$\chi_M T \equiv A_1 e^{(-k_1 t)} + y_0,$$

with

$$(\chi_M T)_{max} = A_1 + y_0,$$

$$(\chi_M T)_{min} = y_0$$

for exponential decay,

and with

$$(\chi_M T)_{min} = A_1 + y_0, (A_1 < 0),$$

$$(\chi_M T)_{max} = y_0$$

for exponential decelerating growth.

### (2) Biexponential approximation (biexponential decay)

$$\begin{aligned}\chi_M T &= A \left\{ [(\chi_M T)_{max} - (\chi_M T)_{min}]e^{(-\frac{t}{\tau_1})} + (\chi_M T)_{min} \right\} + (1 - A) \left\{ [(\chi_M T)_{max} - \right. \\ &(\chi_M T)_{min}]e^{(-\frac{t}{\tau_2})} + (\chi_M T)_{min} \left. \right\} = A \left\{ [(\chi_M T)_{max} - (\chi_M T)_{min}]e^{(-k_1 t)} + (\chi_M T)_{min} \right\} + \\ &(1 - A) \left\{ [(\chi_M T)_{max} - (\chi_M T)_{min}]e^{(-k_2 t)} + (\chi_M T)_{min} \right\} \equiv A_1 e^{(-k_1 t)} + A_2 e^{(-k_2 t)} + y_0,\end{aligned}$$

$$(\chi_M T)_{max} = A_1 + A_2 + y_0,$$

$$(\chi_M T)_{min} = y_0,$$

$$A = \frac{A_1}{A_1 + A_2}.$$

### (3) Triexponential approximation (triexponential decay)

$$\begin{aligned}
 \chi_M T &= A \left\{ [(\chi_M T)_{max} - (\chi_M T)_{min}] e^{\left(-\frac{t}{\tau_1}\right)} + (\chi_M T)_{min} \right\} \\
 &\quad + B \left\{ [(\chi_M T)_{max} - (\chi_M T)_{min}] e^{\left(-\frac{t}{\tau_2}\right)} + (\chi_M T)_{min} \right\} \\
 &\quad + (1 - A - B) \left\{ [(\chi_M T)_{max} - (\chi_M T)_{min}] e^{\left(-\frac{t}{\tau_3}\right)} + (\chi_M T)_{min} \right\} \\
 &= A \left\{ [(\chi_M T)_{max} - (\chi_M T)_{min}] e^{(-k_1 t)} + (\chi_M T)_{min} \right\} \\
 &\quad + B \left\{ [(\chi_M T)_{max} - (\chi_M T)_{min}] e^{(-k_2 t)} + (\chi_M T)_{min} \right\} \\
 &\quad + (1 - A - B) \left\{ [(\chi_M T)_{max} - (\chi_M T)_{min}] e^{\left(-\frac{t}{\tau_3}\right)} + (\chi_M T)_{min} \right\} \\
 &\equiv A_1 e^{(-k_1 t)} + A_2 e^{(-k_2 t)} + A_3 e^{(-k_3 t)} + y_0
 \end{aligned}$$

$$(\chi_M T)_{max} = A_1 + A_2 + A_3 + y_0,$$

$$(\chi_M T)_{min} = y_0,$$

$$A = \frac{A_1}{A_1 + A_2 + A_3},$$

$$B = \frac{A_2}{A_1 + A_2 + A_3},$$

where  $k_i$  (rate constants) or  $\tau_i$  (lifetimes for  $i^{\text{th}}$  exponent,  $\tau_i = 1/k_i$ ),  $A_i$  (preexponents) and  $y_0$  are fitting parameters,  $(\chi_M T)_{max}$  and  $(\chi_M T)_{min}$  are the highest and the lowest  $\chi_M T$  values for a kinetic curve and  $A$  and  $B$  are the population ratios of the states responsible for the decay with the rate constants  $k_1$  and  $k_2$ .

(4) For exponential decay yield for  $i^{\text{th}}$  exponent,  $R_i$ , can be calculated as

$$R_i = \frac{\int_0^\infty A_i e^{-\frac{t}{\tau_i}} dt}{\sum_{i=1}^m \int_0^\infty A_i e^{-\frac{t}{\tau_i}} dt} = \frac{A_i \tau_i}{\sum_{i=1}^m A_i \tau_i},$$

where  $m$  is the number of exponents.

## (5) Decay with a shape intermediate between sigmoidal and exponential decelerating

Relaxation curves having both exponential decelerating and sigmoidal character can be fitted using the equation combining both sigmoidal and exponential decay components. We combined here the Johnson-Mehl-Avrami-Kolmogorov equation<sup>S1</sup> and the equation describing monoexponential decay:

$$\chi_M T = A\{[(\chi_M T)_{max} - (\chi_M T)_{min}]e^{-(k_1 t)^n} + (\chi_M T)_{min}\} + (1 - A)\{[(\chi_M T)_{max} - (\chi_M T)_{min}]e^{(-k_2 t)} + (\chi_M T)_{min}\} \equiv A_1 e^{-(k_1 t)^n} + A_2 e^{(-k_2 t)} + y_0,$$

with

$$(\chi_M T)_{max} = A_1 + A_2 + y_0,$$

$$(\chi_M T)_{min} = y_0,$$

$$A = \frac{A_1}{A_1 + A_2},$$

where  $k_i$  (rate constants),  $n$  (Avrami exponent),  $A_i$  (preexponents) and  $y_0$  are fitting parameters,  $(\chi_M T)_{max}$  and  $(\chi_M T)_{min}$  are the highest and the lowest  $\chi_M T$  values for a kinetic curve and  $A$  is the population ratio of the state responsible for the decay with the rate constant  $k_1$ .

S1 W. A. Johnson and R. F. Mehl, *Trans. Am. Inst. Min. Eng.*, 1939, **135**, 416–458; M. Avrami, *J. Chem. Phys.*, 1939, **7**, 1103–1112; A. N. Kolmogorov, *Bull. Acad. Sci. USSR, Phys. Ser.*, 1937, **1**, 355–359.

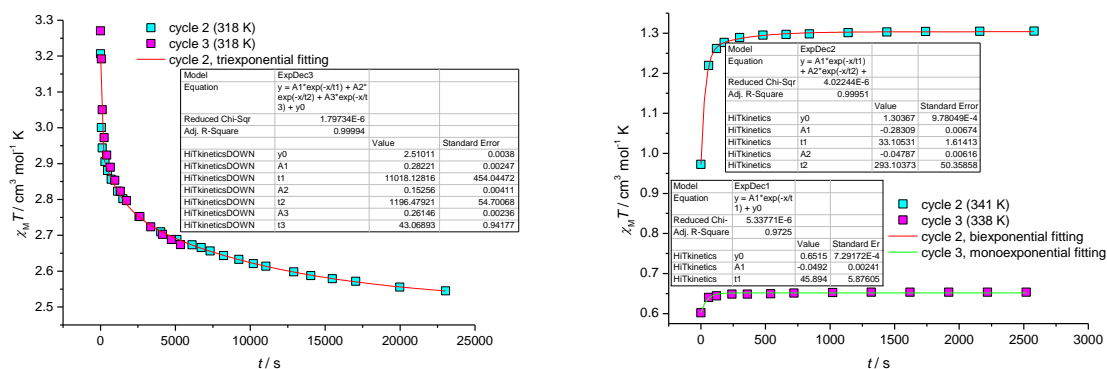

**Fig. S16** Kinetic curves for the sample 1.

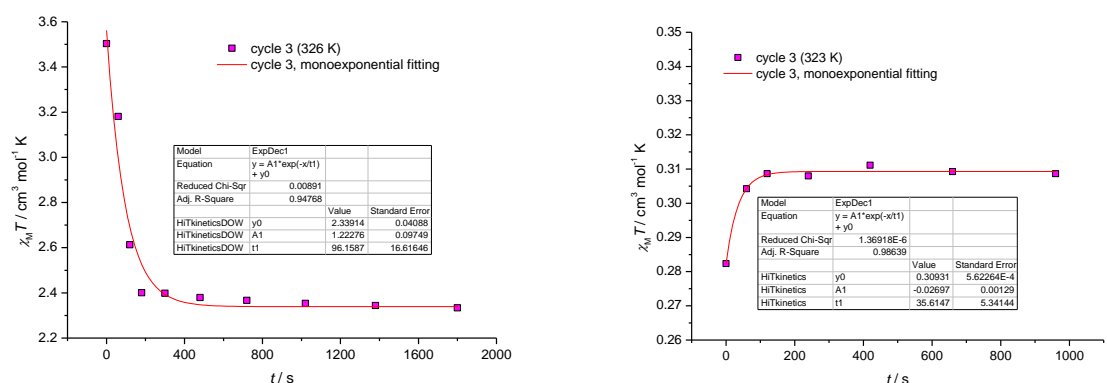

**Fig. S17** Kinetic curves for the sample 2.

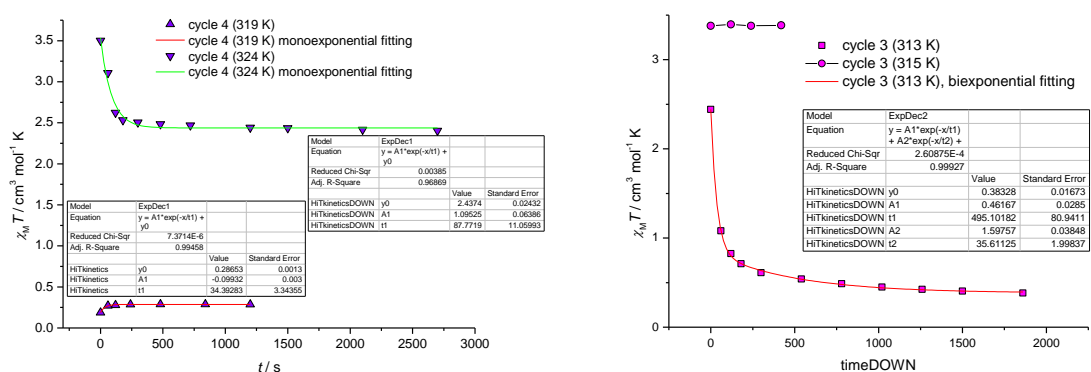

**Fig. S18** Kinetic curves for the sample 3 (left) and sample 4 (right, annealing at 315 K did not reveal any lowering of the magnetic moment, but after fast cooling to 313 K we observed very fast exponential decay).

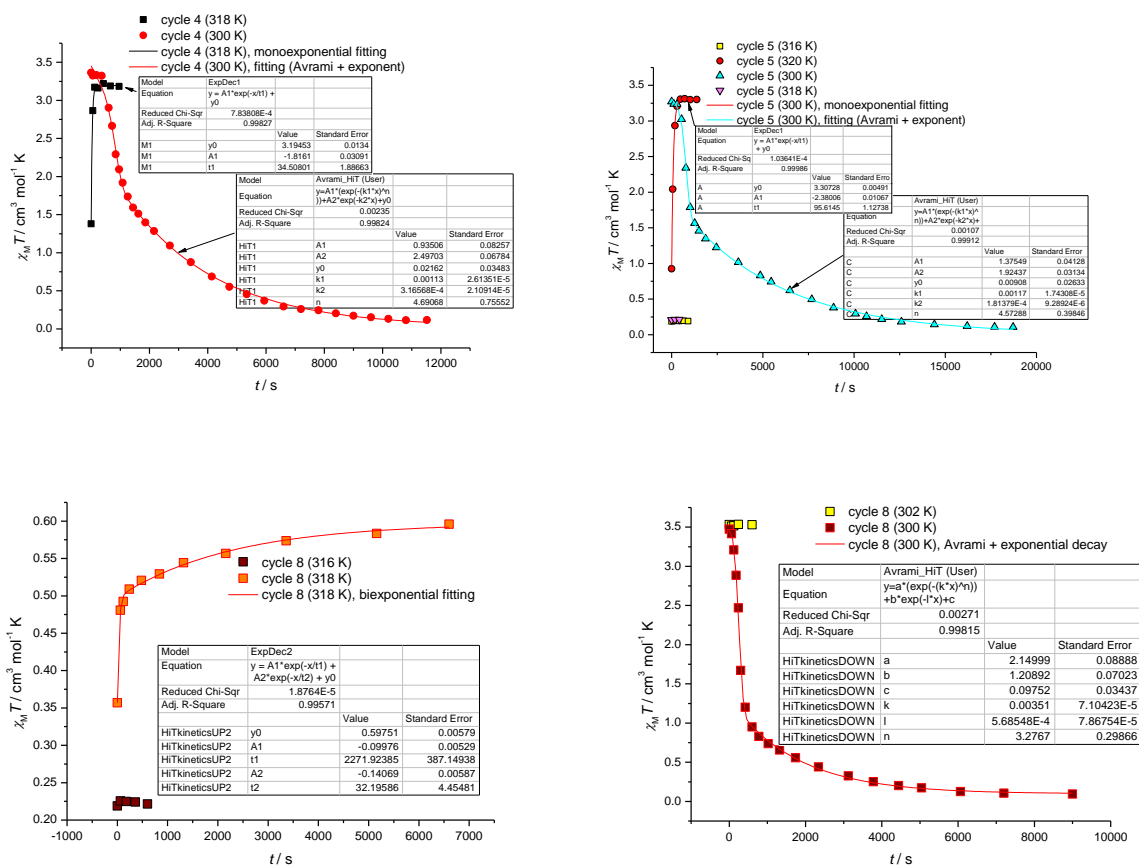

**Fig. S19** Kinetic curves for the samples **6** (top) and **9** (bottom). Isothermal annealing of the sample **9** in the 8<sup>th</sup> thermal cycle at 302 K (Fig S19, bottom, right) did not reveal any decrease in the magnetic moment values for 10 min.

**Table S1.** Kinetic parameters  $y_0$  (cm<sup>3</sup>mol<sup>-1</sup>K),  $A_i$  (cm<sup>3</sup>mol<sup>-1</sup>K),  $\tau_i$  (s),  $k_i$  (s<sup>-1</sup>),  $n$ ,  $A$ ,  $B$ ,  $(\chi_M T)_{max}$  (cm<sup>3</sup>mol<sup>-1</sup>K) and  $(\chi_M T)_{min}$  (cm<sup>3</sup>mol<sup>-1</sup>K) for the LS  $\rightarrow$  HS and the HS  $\rightarrow$  LS isothermal transformations. Kinetic curves are shown in Figs. S16 – S19.

| Sample | Cycle           | $y_0$  | $A_1$   | $\tau_1$           | $k_1$                 | $A_2$  | $\tau_2$           | $k_2$                 | $A_3$ | $\tau_3$           | $k_3$  | $n$ | $A$  | $B$  | $(\chi_M T)_{max}$ | $(\chi_M T)_{min}$ |
|--------|-----------------|--------|---------|--------------------|-----------------------|--------|--------------------|-----------------------|-------|--------------------|--------|-----|------|------|--------------------|--------------------|
| 1      | cycle 2 (341 K) | 1.304  | -0.283  | $3.3 \times 10^1$  | $3.0 \times 10^{-2}$  | -0.047 | $2.9 \times 10^2$  | $3.4 \times 10^{-3}$  |       |                    |        |     | 0.86 |      | 1.30               | 1.02               |
|        | cycle 2 (318 K) | 2.51   | 0.282   | $1.1 \times 10^4$  | $9.1 \times 10^{-5}$  | 0.15   | $1.2 \times 10^3$  | $8.3 \times 10^{-4}$  | 0.261 | $4.31 \times 10^1$ | 0.0232 |     | 0.65 | 0.22 | 3.20               | 2.51               |
|        | cycle 3 (338 K) | 0.6515 | -0.049  | $4.6 \times 10^1$  | $2.2 \times 10^{-2}$  |        |                    |                       |       |                    |        |     |      |      | 0.65               | 0.60               |
| 2      | cycle 3 (326 K) | 2.34   | 1.22    | $9.6 \times 10^1$  | $1.0 \times 10^{-2}$  |        |                    |                       |       |                    |        |     |      |      | 3.56               | 2.34               |
|        | cycle 3 (323 K) | 0.3093 | -0.0217 | $3.6 \times 10^1$  | $2.8 \times 10^{-2}$  |        |                    |                       |       |                    |        |     |      |      | 0.31               | 0.29               |
| 3      | cycle 4 (324 K) | 0.287  | -0.0993 | $3.4 \times 10^1$  | $2.9 \times 10^{-2}$  |        |                    |                       |       |                    |        |     |      |      | 0.29               | 0.19               |
|        | cycle 4 (319 K) | 2.44   | 1.1     | $8.8 \times 10^1$  | $1.1 \times 10^{-2}$  |        |                    |                       |       |                    |        |     |      |      | 3.54               | 2.44               |
| 4      | cycle 3 (313 K) | 0.383  | 0.46    | $5.0 \times 10^2$  | $2.0 \times 10^{-3}$  | 1.60   | $3.6 \times 10^1$  | $2.8 \times 10^{-2}$  |       |                    |        |     | 0.22 |      | 2.44               | 0.383              |
| 6      | cycle 4 (318 K) | 3.19   | -1.82   | $3.5 \times 10^1$  | $2.9 \times 10^{-2}$  |        |                    |                       |       |                    |        |     |      |      | 3.19               | 1.37               |
|        | cycle 4 (300 K) | 0.02   | 0.94    | $8.85 \times 10^2$ | $1.13 \times 10^{-3}$ | 2.5    | $2.92 \times 10^3$ | $3.42 \times 10^{-4}$ |       |                    |        | 4.7 | 0.27 |      | 3.46               | 0.02               |
|        | cycle 5 (320 K) | 3.307  | -2.8    | $9.6 \times 10^1$  | $1.0 \times 10^{-2}$  |        |                    |                       |       |                    |        |     |      |      | 3.31               | 0.51               |
|        | cycle 5 (300 K) | 0.009  | 1.38    | $8.55 \times 10^2$ | $1.17 \times 10^{-3}$ | 1.92   | $5.52 \times 10^3$ | $1.81 \times 10^{-4}$ |       |                    |        | 4.6 | 0.42 |      | 3.31               | 0.009              |
| 9      | cycle 8 (318 K) | 0.598  | -0.0998 | $2.3 \times 10^3$  | $4.4 \times 10^{-4}$  | -0.141 | $3.2 \times 10^1$  | $3.1 \times 10^{-2}$  |       |                    |        |     | 0.41 |      | 0.60               | 0.36               |
|        | cycle 8 (300 K) | 0.098  | 2.15    | $2.9 \times 10^2$  | $3.5 \times 10^{-3}$  | 1.21   | $1.8 \times 10^3$  | $5.6 \times 10^{-4}$  |       |                    |        | 3.3 | 0.64 |      | 3.46               | 0.098              |

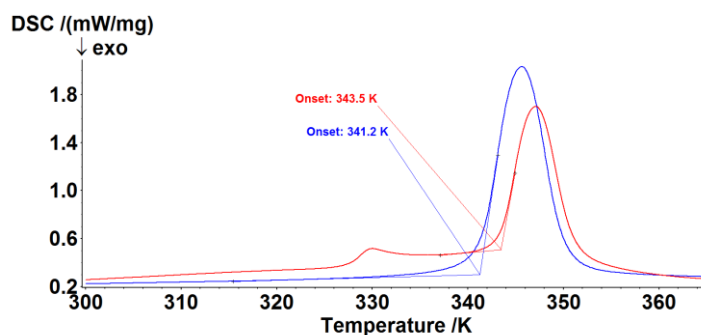

**Fig. S20** The sample **10**: comparison of the first cycle (red line) and the tenth cycle (blue line).

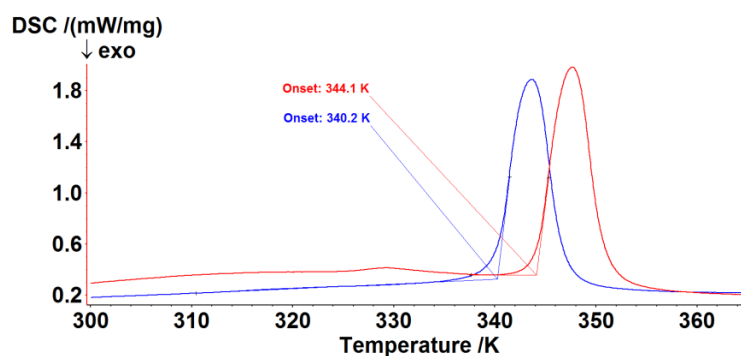

**Fig. S21** The sample **11**: comparison of the first cycle (red line) and the sixteenth cycle (blue line).

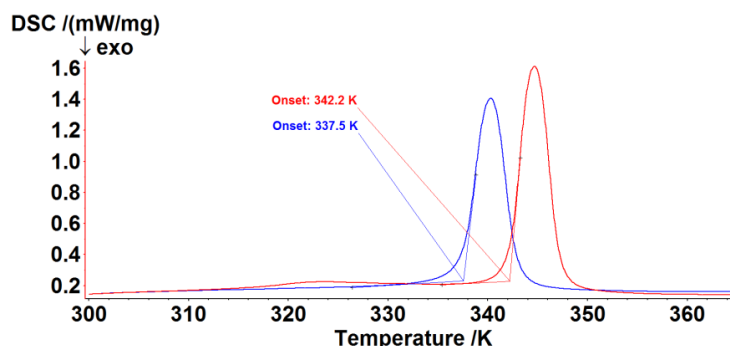

**Fig. S22** The sample **12**: comparison of the first cycle (red line) and the ninth cycle (blue line).

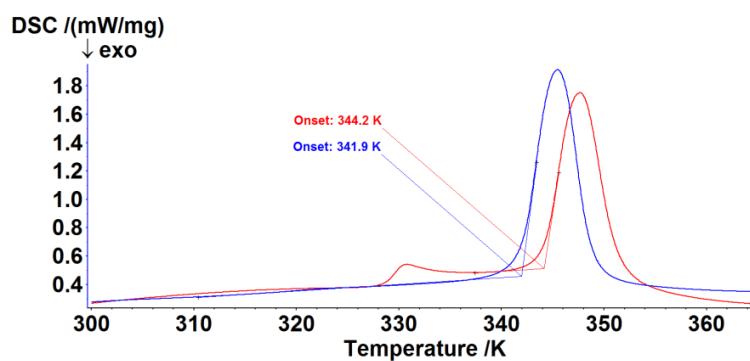

**Fig. S23** The sample **13**: comparison of the first cycle (red line) and the fourth cycle (blue line).

Table S2. Magnetochemical data for the samples **1 – 9**.

| Sample   | Conditions / formula                                                               | Cycle | Day   | $T_c \uparrow$ , K   | $T_c \downarrow$ , K | $\Delta T$ |
|----------|------------------------------------------------------------------------------------|-------|-------|----------------------|----------------------|------------|
| <b>1</b> | Vacuum,<br>$\text{Fe(ATrz)}_3(\text{NO}_3)_2$                                      | 1     | 1st   | 345                  | 317                  | 28         |
|          |                                                                                    | 2     | 1st   | (341 kin.), 345      | (318 kin.)           |            |
|          |                                                                                    | 3     | 3rd   | (338 kin.), 345      | (318 kin.), 315      | 30         |
|          |                                                                                    | 4     | 3rd   | 343                  | 314                  | 29         |
| <b>2</b> | Sealed ampoule,<br>$\text{Fe(ATrz)}_3(\text{NO}_3)_2 \cdot \text{H}_2\text{O}$     | 1     | 1st   | 326                  | 325                  | 1          |
|          |                                                                                    | 2     | 1st   | 327                  | 324                  | 3          |
|          |                                                                                    | 3     | 1st   | (323 kin.), 327      | (326 kin.), 324      | 3          |
|          |                                                                                    | 4     | 7th   | 328                  | 326                  | 2          |
|          |                                                                                    | 5     | 363rd | 328                  | 325                  | 3          |
| <b>3</b> | Sealed ampoule,<br>$\text{Fe(ATrz)}_3(\text{NO}_3)_2 \cdot 1.37\text{H}_2\text{O}$ | 1     | 1st   | 319/326              | 317/322              | 2/4        |
|          |                                                                                    | 2     | 1st   | 320/327              | 317/324              | 3/3        |
|          |                                                                                    | 3     | 1st   | 320/327              | 317/324              | 3/3        |
|          |                                                                                    | 4     | 1st   | (319 kin.), 320/327  | (324 kin.)           |            |
|          |                                                                                    | 5     | 15th  | 321/328              | 318/324              | 3/4        |
|          |                                                                                    | 6     | 375th | 321/329              | 316/324              | 5/5        |
| <b>4</b> | Sealed ampoule,<br>$\text{Fe(ATrz)}_3(\text{NO}_3)_2 \cdot 3.6\text{H}_2\text{O}$  | 1     | 1st   | 322                  | 315                  | 7          |
|          |                                                                                    | 2     | 1st   | 319                  | 315                  | 4          |
|          |                                                                                    | 3     | 1st   | 319                  | (313 kin.)           |            |
| <b>5</b> | Sealed ampoule,<br>$\text{Fe(ATrz)}_3(\text{NO}_3)_2 \cdot 5.8\text{H}_2\text{O}$  | 1     | 1st   | 321                  | 305                  | 16         |
|          |                                                                                    | 2     | 1st   | 318                  | 304                  | 14         |
| <b>6</b> | Sealed ampoule,<br>$\text{Fe(ATrz)}_3(\text{NO}_3)_2 \cdot 15\text{H}_2\text{O}$   | 1     | 1st   | 321                  | 302                  | 19         |
|          |                                                                                    | 2     | 1st   | 319                  | 301                  | 18         |
|          |                                                                                    | 3     | 1st   | 319                  | 301                  | 18         |
|          |                                                                                    | 4     | 1st   | (318 kin.)           | (300 kin.)           |            |
|          |                                                                                    | 5     | 15th  | (316, 318, 320 kin.) | (300 kin.)           |            |
|          |                                                                                    | 6     | 15th  | 320                  | 301                  | 19         |
| <b>7</b> | Sealed ampoule,<br>$\text{Fe(ATrz)}_3(\text{NO}_3)_2 \cdot 16.6\text{H}_2\text{O}$ | 1     | 1st   | 321                  | 304                  | 17         |
|          |                                                                                    | 2     | 1st   | 318                  | 300                  | 18         |
| <b>8</b> | Sealed ampoule,<br>$\text{Fe(ATrz)}_3(\text{NO}_3)_2 \cdot 0.5\text{H}_2\text{O}$  | 1     | 1st   | 335                  | 325                  | 10         |
|          |                                                                                    | 2     | 1st   | 328                  | 326                  | 2          |
|          |                                                                                    | 3     | 1st   | 329                  | 325                  | 4          |
| <b>9</b> | Vacuum, $\text{Fe(ATrz)}_3(\text{NO}_3)_2$                                         | 1     | 1st   | 345                  | 316                  | 29         |
|          | Sealed ampoule,<br>$\text{Fe(ATrz)}_3(\text{NO}_3)_2 \cdot 0.5\text{H}_2\text{O}$  | 2     | 2nd   | 334                  | 324                  | 10         |
|          |                                                                                    | 3     | 2nd   | 327                  | 325                  | 2          |
|          |                                                                                    | 4     | 2nd   | 327                  | 325                  | 2          |
|          | Vacuum, $\text{Fe(ATrz)}_3(\text{NO}_3)_2$                                         | 5     | 2nd   | 345                  | 313                  | 32         |
|          | Sealed ampoule,<br>$\text{Fe(ATrz)}_3(\text{NO}_3)_2 \cdot 10.6\text{H}_2\text{O}$ | 1     | 9th   | 321                  | 303                  | 18         |
|          |                                                                                    | 2     | 9th   | 318                  | 302                  | 16         |
|          |                                                                                    | 3     | 9th   | (316, 318 kin.), 320 | (302, 300 kin.)      |            |

Temperatures at which isothermal kinetic experiments have been performed are labelled by the abbreviation "kin.".

Table S3. DSC data for the samples **10 – 20**.

| Sample    | Conditions / formula                                                 | Cycle | Day             | Heating rate, K/min | $T_{\text{onset}}^{\uparrow}$ , K | $T_{\text{onset}}^{\downarrow}$ , K | $\Delta H$ , J mol <sup>-1</sup> | $\Delta S$ , J mol <sup>-1</sup> K <sup>-1</sup> | CnB model |                       |                              |          | Fn model |                              |          |
|-----------|----------------------------------------------------------------------|-------|-----------------|---------------------|-----------------------------------|-------------------------------------|----------------------------------|--------------------------------------------------|-----------|-----------------------|------------------------------|----------|----------|------------------------------|----------|
|           |                                                                      |       |                 |                     |                                   |                                     |                                  |                                                  | $n$       | $\log K_{\text{cat}}$ | $E_a$ , kJ mol <sup>-1</sup> | $\log A$ | $n$      | $E_a$ , kJ mol <sup>-1</sup> | $\log A$ |
| <b>10</b> | Open crucible, Fe(ATrz) <sub>3</sub> (NO <sub>3</sub> ) <sub>2</sub> | 1     | 1 <sup>st</sup> | 9                   | 343.5                             |                                     | 18839                            | 53.9                                             |           |                       |                              |          |          |                              |          |
|           |                                                                      | 2     | 3 <sup>rd</sup> | 9                   | 343.3                             |                                     | 19185                            | 54.7                                             |           |                       |                              |          |          |                              |          |
|           |                                                                      | 3     | 3 <sup>rd</sup> | 9                   | 342.2                             |                                     | 22339                            | 64.3                                             | 2.96      | -2.39                 | 1312                         | 198.4    | 2.67     | 1169                         | 176.7    |
|           |                                                                      | 4     | 3 <sup>rd</sup> | 9                   | 341.8                             |                                     | 22123                            | 63.6                                             | 2.79      | -0.50                 | 1194                         | 180.5    | 2.60     | 1159                         | 175.2    |
|           |                                                                      | 5     | 6 <sup>th</sup> | 9                   | 343.3                             |                                     | 22296                            | 63.8                                             | 3.15      | 0.22                  | 1213                         | 182.6    | 3.05     | 1361                         | 205.7    |
|           |                                                                      | 6     | 6 <sup>th</sup> | 9                   | 341.9                             |                                     | 22642                            | 65.3                                             | 2.76      | 0.17                  | 1069                         | 161.4    | 2.70     | 1222                         | 184.8    |
|           |                                                                      | 7     | 7 <sup>th</sup> | 9                   | 341.5                             |                                     | 22685                            | 65.5                                             | 2.86      | 0.22                  | 1107                         | 167.4    | 2.79     | 1279                         | 193.8    |
|           |                                                                      | 8     | 8 <sup>th</sup> | 9                   | 342.8                             |                                     | 22426                            | 64.3                                             | 2.71      | 0.070                 | 1437                         | 217.1    | 3.11     | 1417                         | 214.1    |
|           |                                                                      | 9     | 8 <sup>th</sup> | 6                   | 341.5                             |                                     | 22728                            | 65.5                                             | 3.30      | -0.28                 | 1311                         | 198.4    | 2.57     | 1394                         | 211.2    |
|           |                                                                      | 10    | 8 <sup>th</sup> | 12                  | 341.5                             |                                     | 22512                            | 64.9                                             | 3.11      | -0.098                | 1130                         | 171.0    | 2.88     | 1137                         | 172.2    |
| <b>11</b> | Open crucible, Fe(ATrz) <sub>3</sub> (NO <sub>3</sub> ) <sub>2</sub> | 1     | 1 <sup>st</sup> | 9                   | 344.1                             |                                     | 22771                            | 65.1                                             | 2.77      | -4.0                  | 1399                         | 210.4    | 2.71     | 1336                         | 200.9    |
|           |                                                                      | 2     | 2 <sup>nd</sup> | 9                   | 342.6                             |                                     | 22123                            | 63.4                                             | 2.98      | -0.85                 | 1369                         | 206.8    | 2.43     | 1214                         | 183.2    |
|           |                                                                      | 3     | 2 <sup>nd</sup> | 9                   | 341.2                             |                                     | 21821                            | 62.8                                             | 2.53      | -4.0                  | 1234                         | 187.0    | 2.32     | 1145                         | 173.5    |
|           |                                                                      | 4     | 2 <sup>nd</sup> | 9                   | 340.2                             |                                     | 21778                            | 62.0                                             | 2.41      | -1.30                 | 1154                         | 175.2    | 2.23     | 1050                         | 159.4    |
|           |                                                                      | 5     | 5 <sup>th</sup> | 9                   | 343.4                             |                                     | 21475                            | 62.2                                             | 2.85      | -0.40                 | 1230                         | 185.3    | 2.54     | 1244                         | 187.3    |
|           |                                                                      | 6     | 5 <sup>th</sup> | 9                   | 341.1                             |                                     | 20870                            | 59.8                                             | 2.44      | -0.21                 | 1027                         | 155.3    | 2.20     | 1015                         | 153.5    |
|           |                                                                      | 7     | 5 <sup>th</sup> | 9                   | 341.7                             |                                     | 22296                            | 64.1                                             | 2.73      | -0.90                 | 1274                         | 192.8    | 2.49     | 1232                         | 186.5    |
|           |                                                                      | 8     | 6 <sup>th</sup> | 9                   | 341.8                             |                                     | 21432                            | 61.5                                             | 2.76      | -0.39                 | 1198                         | 181.3    | 2.39     | 1142                         | 172.7    |
|           |                                                                      | 9     | 6 <sup>th</sup> | 9                   | 340.0                             |                                     | 21043                            | 60.4                                             | 2.36      | -0.47                 | 1102                         | 167.3    | 2.24     | 1031                         | 156.4    |
|           |                                                                      | 10    | 6 <sup>th</sup> | 9                   | 339.1                             |                                     | 21864                            | 62.9                                             | 2.72      | -0.17                 | 1139                         | 172.9    | 2.32     | 1090                         | 165.5    |
|           |                                                                      | 11    | 6 <sup>th</sup> | 9                   | 339.9                             |                                     | 21864                            | 63.1                                             | 2.46      | 0.17                  | 997                          | 151.1    | 2.32     | 1090                         | 165.5    |
|           |                                                                      | 12    | 6 <sup>th</sup> | 9                   | 338.9                             |                                     | 21648                            | 62.2                                             | 2.76      | -0.61                 | 1274                         | 192.9    | 2.50     | 1268                         | 192.0    |
|           |                                                                      | 13    | 6 <sup>th</sup> | 9                   | 340.4                             |                                     | 21734                            | 62.8                                             | 2.60      | -0.91                 | 1206                         | 183.1    | 2.35     | 1121                         | 170.2    |
|           |                                                                      | 14    | 6 <sup>th</sup> | 9                   | 340.2                             |                                     | 21864                            | 63.1                                             | 2.59      | -0.58                 | 1177                         | 178.8    | 2.49     | 1133                         | 172.0    |
|           |                                                                      | 15    | 7 <sup>th</sup> | 9                   | 341.8                             |                                     | 21864                            | 62.8                                             | 3.07      | -0.013                | 1237                         | 187.3    | 2.76     | 1306                         | 197.9    |
|           |                                                                      | 16    | 7 <sup>th</sup> | 9                   | 340.2                             |                                     | 21994                            | 63.4                                             | 2.70      | -0.54                 | 1246                         | 189.4    | 2.57     | 1268                         | 192.9    |
|           |                                                                      | 17    | 7 <sup>th</sup> | 9                   | 341.2                             |                                     | 22123                            | 63.6                                             | 3.01      | -0.22                 | 1285                         | 195.0    | 2.71     | 1298                         | 196.9    |

|    |                                                                                                 |   |                 |   |       |       |       |      |      |        |      |       |      |      |       |
|----|-------------------------------------------------------------------------------------------------|---|-----------------|---|-------|-------|-------|------|------|--------|------|-------|------|------|-------|
|    |                                                                                                 |   |                 |   |       |       |       |      |      |        |      |       |      |      |       |
| 12 | Open crucible,<br>Fe(ATrz) <sub>3</sub> (NO <sub>3</sub> ) <sub>2</sub>                         | 1 | 1 <sup>st</sup> | 6 | 342.2 |       | 22555 | 64.9 | 2.57 | 0.50   | 1263 | 190.7 | 2.75 | 1819 | 275.7 |
|    |                                                                                                 | 2 | 1 <sup>st</sup> | 6 | 339.9 |       | 22555 | 65.3 | 2.51 | 0.53   | 1165 | 177.0 | 2.66 | 1678 | 256.0 |
|    |                                                                                                 | 3 | 1 <sup>st</sup> | 6 | 338.9 |       | 22555 | 65.3 | 2.68 | 0.28   | 1302 | 198.6 | 2.52 | 1549 | 236.7 |
|    |                                                                                                 | 4 | 1 <sup>st</sup> | 6 | 338.4 |       | 21821 | 63.3 | 2.64 | 0.27   | 1246 | 190.2 | 2.33 | 1401 | 214.3 |
|    |                                                                                                 | 5 | 3 <sup>rd</sup> | 6 | 340.0 |       | 21821 | 63.1 | 2.43 | 0.75   | 1000 | 151.5 | 2.70 | 1621 | 247.2 |
|    |                                                                                                 | 6 | 3 <sup>rd</sup> | 6 | 338.9 |       | 21907 | 63.6 | 2.64 | 0.40   | 1253 | 191.2 | 2.54 | 1566 | 239.5 |
|    |                                                                                                 | 7 | 3 <sup>rd</sup> | 6 | 338.1 |       | 21562 | 62.7 | 2.69 | -0.034 | 1420 | 217.3 | 2.34 | 1419 | 217.3 |
|    |                                                                                                 | 8 | 3 <sup>rd</sup> | 6 | 337.4 |       | 21259 | 63.8 | 2.63 | -0.15  | 1363 | 208.9 | 2.21 | 1290 | 197.7 |
|    |                                                                                                 | 9 | 3rd             | 6 | 337.6 |       | 21648 | 63.0 | 2.68 | 0.03   | 1336 | 204.7 | 2.22 | 1309 | 200.5 |
|    |                                                                                                 |   |                 |   |       |       |       |      |      |        |      |       |      |      |       |
| 13 | Open crucible,<br>Fe(ATrz) <sub>3</sub> (NO <sub>3</sub> ) <sub>2</sub>                         | 1 | 1 <sup>st</sup> | 9 | 344.2 | 317.1 | 19488 | 56.0 | 2.98 | 0.13   | 1087 | 163.1 | 3.07 | 1283 | 192.9 |
|    |                                                                                                 | 2 | 1 <sup>st</sup> | 9 | 344.6 | 316.9 | 19660 | 56.4 | 2.42 | -0.15  | 1076 | 162.1 | 2.46 | 1143 | 172.3 |
|    |                                                                                                 | 3 | 1 <sup>st</sup> | 9 | 343.4 | 316.1 | 20525 | 59.3 | 2.20 | 0.22   | 1003 | 151.0 | 2.69 | 1326 | 200.0 |
|    |                                                                                                 | 4 | 1 <sup>st</sup> | 9 | 342.0 | 316.3 | 20697 | 59.4 | 2.54 | -0.045 | 1081 | 163.2 | 2.39 | 1160 | 175.3 |
|    |                                                                                                 |   |                 |   |       |       |       |      |      |        |      |       |      |      |       |
| 14 | Sealed crucible,<br>Fe(ATrz) <sub>3</sub> (NO <sub>3</sub> ) <sub>2</sub> ·H <sub>2</sub> O     | 1 | 1 <sup>st</sup> | 9 | 328.9 |       | 25529 | 76.4 |      |        |      |       |      |      |       |
|    |                                                                                                 | 2 | 1 <sup>st</sup> | 9 | 326.1 |       | 22467 | 67.6 |      |        |      |       |      |      |       |
|    |                                                                                                 | 3 | 2 <sup>nd</sup> | 9 | 326.6 |       | 22873 | 69.0 |      |        |      |       |      |      |       |
|    |                                                                                                 | 4 | 2 <sup>nd</sup> | 9 | 326.3 |       | 22467 | 66.8 |      |        |      |       |      |      |       |
|    |                                                                                                 | 5 | 5 <sup>th</sup> | 9 | 326.4 |       | 22152 | 66.4 |      |        |      |       |      |      |       |
|    |                                                                                                 | 6 | 5 <sup>th</sup> | 9 | 326.2 |       | 22692 | 68.2 |      |        |      |       |      |      |       |
|    |                                                                                                 | 7 | 5 <sup>th</sup> | 9 | 326.1 |       | 22377 | 67.5 |      |        |      |       |      |      |       |
|    |                                                                                                 | 8 | 5 <sup>th</sup> | 9 | 326.1 |       | 21792 | 65.7 |      |        |      |       |      |      |       |
|    |                                                                                                 | 9 | 5 <sup>th</sup> | 9 | 326.1 |       | 22242 | 67.0 |      |        |      |       |      |      |       |
|    |                                                                                                 |   |                 |   |       |       |       |      |      |        |      |       |      |      |       |
| 15 | Sealed crucible,<br>Fe(ATrz) <sub>3</sub> (NO <sub>3</sub> ) <sub>2</sub> ·H <sub>2</sub> O     | 1 | 1 <sup>st</sup> | 9 | 326.4 | 325.8 | 19901 | 59.8 |      |        |      |       |      |      |       |
|    |                                                                                                 | 2 | 1 <sup>st</sup> | 9 | 325.1 | 326.1 | 22738 | 69.8 | 1.50 | 0.23   | 642  | 100.9 | 1.78 | 809  | 127.7 |
|    |                                                                                                 | 3 | 1 <sup>st</sup> | 9 | 325.6 | 326.2 | 23233 | 70.0 | 1.58 | -0.046 | 771  | 121.6 | 1.60 | 899  | 142.1 |
|    |                                                                                                 | 4 | 3 <sup>rd</sup> | 9 | 326.2 | -     | 23053 | 69.3 | 2.00 | -0.061 | 868  | 136.9 | 2.07 | 921  | 145.4 |
|    |                                                                                                 | 5 | 4 <sup>th</sup> | 9 | 326.2 | -     | 23278 | 69.9 | 1.92 | -0.188 | 882  | 139.2 | 2.02 | 998  | 157.6 |
|    |                                                                                                 | 6 | 4 <sup>th</sup> | 9 | 326.2 | 326.2 | 22647 | 68.2 | 1.87 | -0.19  | 871  | 137.3 | 1.90 | 966  | 152.6 |
|    |                                                                                                 | 7 | 5 <sup>th</sup> | 9 | 326.0 | 326.1 | 23188 | 69.9 | 1.88 | -0.54  | 953  | 150.7 | 1.90 | 966  | 152.6 |
|    |                                                                                                 |   |                 |   |       |       |       |      |      |        |      |       |      |      |       |
| 16 | Sealed crucible,<br>Fe(ATrz) <sub>3</sub> (NO <sub>3</sub> ) <sub>2</sub> ·1.25H <sub>2</sub> O | 1 | 1 <sup>st</sup> | 9 | 325.1 | 325.6 | 26095 | 77.5 |      |        |      |       |      |      |       |
|    |                                                                                                 | 2 | 1 <sup>st</sup> | 9 | 323.7 | 325.6 | 25504 | 76.8 |      |        |      |       |      |      |       |

|    |                                                                                                 |   |                 |   |       |       |       |      |      |       |      |       |      |      |       |
|----|-------------------------------------------------------------------------------------------------|---|-----------------|---|-------|-------|-------|------|------|-------|------|-------|------|------|-------|
|    |                                                                                                 | 3 | 1 <sup>st</sup> | 9 | 323.9 | 325.6 | 25458 | 76.7 |      |       |      |       |      |      |       |
|    |                                                                                                 | 4 | 1 <sup>st</sup> | 9 | 323.9 | 325.6 | 25458 | 76.7 |      |       |      |       |      |      |       |
|    |                                                                                                 |   |                 |   |       |       |       |      |      |       |      |       |      |      |       |
| 17 | Sealed crucible,<br>Fe(ATrz) <sub>3</sub> (NO <sub>3</sub> ) <sub>2</sub> ·1.60H <sub>2</sub> O | 1 | 1 <sup>st</sup> | 9 | 321.5 | 322.0 | 25947 | 78.9 |      |       |      |       |      |      |       |
|    |                                                                                                 | 2 | 1 <sup>st</sup> | 9 | 318.6 | 321.9 | 26537 | 80.4 |      |       |      |       |      |      |       |
|    |                                                                                                 | 3 | 7 <sup>th</sup> | 9 | 318.7 | 322.2 | 27257 | 82.7 |      |       |      |       |      |      |       |
|    |                                                                                                 |   |                 |   |       |       |       |      |      |       |      |       |      |      |       |
| 18 | Sealed crucible,<br>Fe(ATrz) <sub>3</sub> (NO <sub>3</sub> ) <sub>2</sub> ·6.43H <sub>2</sub> O | 1 | 1 <sup>st</sup> | 9 | 320.1 | 303.3 | 26903 | 83.1 | 1.94 | 2.17  | 646  | 102.6 |      |      |       |
|    |                                                                                                 | 2 | 1 <sup>st</sup> | 9 | 317.4 | 304.8 | 28382 | 88.2 | 1.83 | 0.94  | 1328 | 216.8 | 1.99 | 1948 | 319.0 |
|    |                                                                                                 | 3 | 4 <sup>th</sup> | 9 | 318.1 | 303.3 | 28546 | 88.7 | 2.75 | -4.0  | 2432 | 397.8 | 2.78 | 2432 | 397.9 |
|    |                                                                                                 |   |                 |   |       |       |       |      |      |       |      |       |      |      |       |
| 19 | Sealed crucible,<br>Fe(ATrz) <sub>3</sub> (NO <sub>3</sub> ) <sub>2</sub> ·9.96H <sub>2</sub> O | 1 | 1 <sup>st</sup> | 9 | 319.9 | 302.5 | 26845 | 82.4 | 3.32 | 0.27  | 1457 | 236.1 | 3.55 | 1827 | 296.5 |
|    |                                                                                                 | 2 | 1 <sup>st</sup> | 9 | 317.8 | 301.8 | 27701 | 85.9 | 2.82 | -0.26 | 1816 | 296.8 | 2.86 | 1970 | 322.2 |
|    |                                                                                                 | 3 | 1 <sup>st</sup> | 9 | 317.7 | 301.4 | 28154 | 88.5 | 2.79 | -4.0  | 1844 | 301.5 | 2.86 | 1854 | 303.1 |
|    |                                                                                                 |   |                 |   |       |       |       |      |      |       |      |       |      |      |       |
| 20 | Sealed crucible,<br>Fe(ATrz) <sub>3</sub> (NO <sub>3</sub> ) <sub>2</sub> ·14.2H <sub>2</sub> O |   | 1 <sup>st</sup> | 9 | 320.9 | 302.3 | 29427 | 90.5 |      |       |      |       |      |      |       |

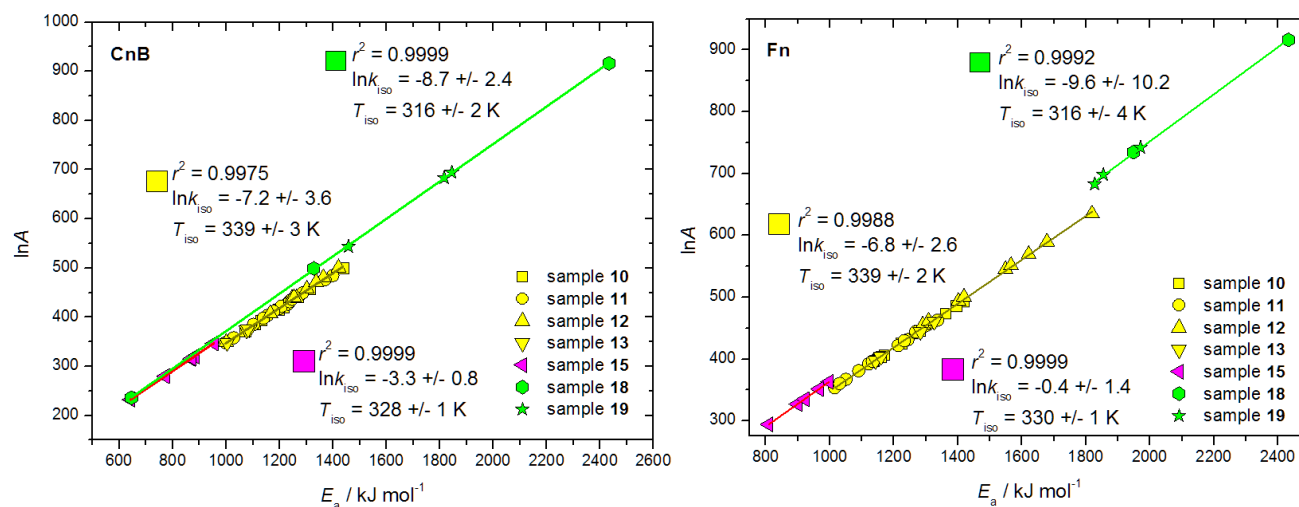

**Fig S24** The  $\ln A$ - $E_a$  compensation for the CnB (left) and Fn (right) models.

Table S4. The  $C_p$  values for the anhydrous complex  $\text{Fe}(\text{ATrz})_3(\text{NO}_3)_2$ .

| $T/\text{K}$ | $C_p/\text{J g}^{-1}$ | $C_p/\text{J mol}^{-1}$ |
|--------------|-----------------------|-------------------------|--------------|-----------------------|-------------------------|--------------|-----------------------|-------------------------|--------------|-----------------------|-------------------------|
| 301.63       | 1.1435                | 494.11                  | 321.83       | 1.4332                | 619.28                  | 342.13       | 11.8610               | 5125.13                 | 362.45       | 1.2575                | 543.36                  |
| 301.92       | 1.1467                | 495.51                  | 322.13       | 1.4396                | 622.03                  | 342.43       | 10.4568               | 4518.36                 | 362.75       | 1.2579                | 543.53                  |
| 302.21       | 1.1503                | 497.03                  | 322.42       | 1.4412                | 622.76                  | 342.73       | 8.7674                | 3788.40                 | 363.05       | 1.2603                | 544.57                  |
| 302.50       | 1.1525                | 498.00                  | 322.72       | 1.4437                | 623.81                  | 343.03       | 7.0319                | 3038.47                 | 363.34       | 1.2605                | 544.64                  |
| 302.79       | 1.1536                | 498.47                  | 323.02       | 1.4481                | 625.71                  | 343.33       | 5.5134                | 2382.32                 | 363.64       | 1.2598                | 544.34                  |
| 303.09       | 1.1553                | 499.19                  | 323.32       | 1.4506                | 626.82                  | 343.63       | 4.3391                | 1874.93                 | 363.94       | 1.2576                | 543.42                  |
| 303.38       | 1.1584                | 500.55                  | 323.62       | 1.4558                | 629.07                  | 343.93       | 3.4971                | 1511.08                 | 364.24       | 1.2568                | 543.04                  |
| 303.67       | 1.1621                | 502.13                  | 323.91       | 1.4625                | 631.95                  | 344.22       | 2.9167                | 1260.32                 | 364.54       | 1.2562                | 542.79                  |
| 303.97       | 1.1686                | 504.96                  | 324.21       | 1.4695                | 634.96                  | 344.52       | 2.5151                | 1086.77                 | 364.84       | 1.2538                | 541.78                  |
| 304.26       | 1.1722                | 506.50                  | 324.51       | 1.4756                | 637.60                  | 344.82       | 2.2350                | 965.75                  | 365.14       | 1.2524                | 541.17                  |
| 304.56       | 1.1763                | 508.28                  | 324.81       | 1.4802                | 639.58                  | 345.12       | 2.0395                | 881.26                  | 365.44       | 1.2539                | 541.80                  |
| 304.86       | 1.1812                | 510.40                  | 325.11       | 1.4821                | 640.40                  | 345.42       | 1.8967                | 819.58                  | 365.74       | 1.2552                | 542.38                  |
| 305.15       | 1.1839                | 511.56                  | 325.41       | 1.4860                | 642.10                  | 345.72       | 1.7919                | 774.27                  | 366.04       | 1.2577                | 543.45                  |
| 305.45       | 1.1823                | 510.86                  | 325.70       | 1.4918                | 644.61                  | 346.02       | 1.7137                | 740.48                  | 366.33       | 1.2592                | 544.09                  |
| 305.75       | 1.1841                | 511.63                  | 326.00       | 1.4957                | 646.28                  | 346.31       | 1.6538                | 714.60                  | 366.63       | 1.2586                | 543.84                  |
| 306.05       | 1.1886                | 513.61                  | 326.30       | 1.4998                | 648.07                  | 346.61       | 1.6087                | 695.11                  | 366.93       | 1.2583                | 543.69                  |
| 306.34       | 1.1931                | 515.54                  | 326.60       | 1.5063                | 650.88                  | 346.91       | 1.5729                | 679.63                  | 367.23       | 1.2606                | 544.69                  |
| 306.64       | 1.1979                | 517.61                  | 326.90       | 1.5114                | 653.05                  | 347.21       | 1.5439                | 667.11                  | 367.53       | 1.2632                | 545.81                  |
| 306.94       | 1.2021                | 519.44                  | 327.20       | 1.5153                | 654.74                  | 347.51       | 1.5163                | 655.21                  | 367.83       | 1.2634                | 545.92                  |
| 307.23       | 1.2073                | 521.69                  | 327.50       | 1.5221                | 657.71                  | 347.81       | 1.4924                | 644.86                  | 368.13       | 1.2643                | 546.29                  |
| 307.53       | 1.2116                | 523.54                  | 327.80       | 1.5277                | 660.10                  | 348.11       | 1.4739                | 636.88                  | 368.43       | 1.2654                | 546.79                  |
| 307.83       | 1.2165                | 525.67                  | 328.09       | 1.5319                | 661.94                  | 348.41       | 1.4584                | 630.17                  | 368.73       | 1.2648                | 546.51                  |
| 308.13       | 1.2214                | 527.76                  | 328.39       | 1.5380                | 664.59                  | 348.71       | 1.4451                | 624.45                  | 369.03       | 1.2661                | 547.08                  |
| 308.42       | 1.2240                | 528.87                  | 328.69       | 1.5449                | 667.53                  | 349.00       | 1.4323                | 618.88                  | 369.32       | 1.2678                | 547.82                  |
| 308.72       | 1.2281                | 530.68                  | 328.99       | 1.5525                | 670.82                  | 349.30       | 1.4194                | 613.32                  | 369.62       | 1.2688                | 548.26                  |
| 309.02       | 1.2339                | 533.16                  | 329.29       | 1.5616                | 674.78                  | 349.60       | 1.4079                | 608.37                  | 369.92       | 1.2674                | 547.63                  |
| 309.32       | 1.2392                | 535.47                  | 329.59       | 1.5714                | 678.98                  | 349.90       | 1.3960                | 603.20                  | 370.22       | 1.2630                | 545.73                  |
| 309.62       | 1.2449                | 537.94                  | 329.89       | 1.5782                | 681.95                  | 350.20       | 1.3845                | 598.25                  | 370.52       | 1.2577                | 543.47                  |
| 309.92       | 1.2508                | 540.48                  | 330.18       | 1.5874                | 685.92                  | 350.50       | 1.3786                | 595.69                  | 370.82       | 1.2582                | 543.65                  |
| 310.21       | 1.2591                | 544.05                  | 330.48       | 1.5984                | 690.66                  | 350.80       | 1.3743                | 593.85                  | 371.12       | 1.2614                | 545.05                  |
| 310.51       | 1.2669                | 547.44                  | 330.78       | 1.6084                | 694.98                  | 351.10       | 1.3697                | 591.83                  | 371.42       | 1.2624                | 545.49                  |
| 310.81       | 1.2723                | 549.77                  | 331.08       | 1.6222                | 700.96                  | 351.40       | 1.3630                | 588.96                  | 371.72       | 1.2624                | 545.48                  |
| 311.11       | 1.2754                | 551.11                  | 331.38       | 1.6353                | 706.61                  | 351.69       | 1.3543                | 585.17                  | 372.02       | 1.2629                | 545.68                  |
| 311.41       | 1.2770                | 551.80                  | 331.68       | 1.6473                | 711.80                  | 351.99       | 1.3461                | 581.64                  | 372.31       | 1.2595                | 544.22                  |
| 311.70       | 1.2790                | 552.64                  | 331.98       | 1.6585                | 716.61                  | 352.29       | 1.3373                | 577.85                  | 372.61       | 1.2549                | 542.25                  |
| 312.00       | 1.2844                | 554.99                  | 332.27       | 1.6711                | 722.10                  | 352.59       | 1.3317                | 575.44                  | 372.91       | 1.2543                | 541.97                  |
| 312.30       | 1.2888                | 556.89                  | 332.57       | 1.6858                | 728.44                  | 352.89       | 1.3288                | 574.16                  | 373.21       | 1.2532                | 541.51                  |
| 312.60       | 1.2932                | 558.80                  | 332.87       | 1.7001                | 734.61                  | 353.19       | 1.3239                | 572.05                  | 373.51       | 1.2512                | 540.64                  |
| 312.89       | 1.2989                | 561.26                  | 333.17       | 1.7169                | 741.85                  | 353.49       | 1.3199                | 570.33                  | 373.81       | 1.2523                | 541.10                  |
| 313.19       | 1.3045                | 563.67                  | 333.47       | 1.7371                | 750.59                  | 353.79       | 1.3160                | 568.63                  | 374.11       | 1.2529                | 541.36                  |
| 313.49       | 1.3095                | 565.82                  | 333.77       | 1.7575                | 759.40                  | 354.08       | 1.3117                | 566.78                  | 374.41       | 1.2513                | 540.66                  |
| 313.79       | 1.3123                | 567.07                  | 334.07       | 1.7791                | 768.73                  | 354.38       | 1.3048                | 563.80                  | 374.70       | 1.2490                | 539.67                  |
| 314.08       | 1.3170                | 569.06                  | 334.36       | 1.8059                | 780.32                  | 354.68       | 1.2986                | 561.10                  | 375.00       | 1.2495                | 539.93                  |
| 314.38       | 1.3235                | 571.87                  | 334.66       | 1.8376                | 794.03                  | 354.98       | 1.2995                | 561.51                  | 375.30       | 1.2528                | 541.33                  |
| 314.68       | 1.3270                | 573.41                  | 334.96       | 1.8743                | 809.88                  | 355.28       | 1.2994                | 561.47                  | 375.60       | 1.2542                | 541.95                  |
| 314.98       | 1.3307                | 574.98                  | 335.26       | 1.9191                | 829.23                  | 355.58       | 1.2952                | 559.63                  | 375.90       | 1.2506                | 540.39                  |
| 315.28       | 1.3359                | 577.25                  | 335.56       | 1.9690                | 850.80                  | 355.88       | 1.2920                | 558.26                  | 376.20       | 1.2500                | 540.12                  |
| 315.57       | 1.3414                | 579.62                  | 335.86       | 2.0244                | 874.73                  | 356.18       | 1.2892                | 557.04                  | 376.50       | 1.2529                | 541.38                  |
| 315.87       | 1.3474                | 582.21                  | 336.16       | 2.0923                | 904.09                  | 356.47       | 1.2855                | 555.45                  | 376.80       | 1.2523                | 541.10                  |
| 316.17       | 1.3537                | 584.92                  | 336.46       | 2.1753                | 939.95                  | 356.77       | 1.2831                | 554.44                  | 377.10       | 1.2523                | 541.14                  |
| 316.47       | 1.3588                | 587.14                  | 336.76       | 2.2752                | 983.11                  | 357.07       | 1.2812                | 553.60                  | 377.40       | 1.2554                | 542.46                  |
| 316.76       | 1.3637                | 589.25                  | 337.05       | 2.4003                | 1037.16                 | 357.37       | 1.2796                | 552.90                  | 377.69       | 1.2577                | 543.43                  |
| 317.06       | 1.3683                | 591.23                  | 337.35       | 2.5587                | 1105.62                 | 357.67       | 1.2785                | 552.43                  | 377.99       | 1.2564                | 542.89                  |
| 317.36       | 1.3707                | 592.29                  | 337.65       | 2.7651                | 1194.79                 | 357.97       | 1.2763                | 551.49                  | 378.29       | 1.2543                | 541.96                  |
| 317.66       | 1.3755                | 594.33                  | 337.95       | 3.0350                | 1311.44                 | 358.26       | 1.2734                | 550.23                  | 378.59       | 1.2531                | 541.45                  |
| 317.95       | 1.3800                | 596.31                  | 338.25       | 3.3938                | 1466.46                 | 358.56       | 1.2708                | 549.10                  | 378.89       | 1.2539                | 541.81                  |
| 318.25       | 1.3840                | 598.01                  | 338.55       | 3.8830                | 1677.83                 | 358.86       | 1.2711                | 549.24                  | 379.19       | 1.2554                | 542.47                  |
| 318.55       | 1.3892                | 600.29                  | 338.85       | 4.5639                | 1972.07                 | 359.16       | 1.2709                | 549.17                  |              |                       |                         |
| 318.85       | 1.3934                | 602.10                  | 339.14       | 5.5220                | 2386.05                 | 359.46       | 1.2711                | 549.25                  |              |                       |                         |
| 319.15       | 1.3970                | 603.65                  | 339.44       | 6.8399                | 2955.53                 | 359.76       | 1.2701                | 548.81                  |              |                       |                         |
| 319.44       | 1.4005                | 605.15                  | 339.74       | 8.4549                | 3653.37                 | 360.06       | 1.2688                | 548.24                  |              |                       |                         |
| 319.74       | 1.4037                | 606.53                  | 340.04       | 10.1124               | 4369.56                 | 360.35       | 1.2654                | 546.77                  |              |                       |                         |
| 320.04       | 1.4092                | 608.91                  | 340.34       | 11.5447               | 4988.44                 | 360.65       | 1.2646                | 546.42                  |              |                       |                         |
| 320.34       | 1.4149                | 611.40                  | 340.64       | 12.6157               | 5451.21                 | 360.95       | 1.2662                | 547.11                  |              |                       |                         |
| 320.64       | 1.4192                | 613.22                  | 340.94       | 13.2845               | 5740.23                 | 361.25       | 1.2639                | 546.13                  |              |                       |                         |
| 320.93       | 1.4219                | 614.41                  | 341.24       | 13.5492               | 5854.60                 | 361.55       | 1.2612                | 544.96                  |              |                       |                         |
| 321.23       | 1.4216                | 614.29                  | 341.53       | 13.4149               | 5796.56                 | 361.85       | 1.2604                | 544.62                  |              |                       |                         |
| 321.53       | 1.4259                | 616.12                  | 341.83       | 12.8582               | 5556.01                 | 362.15       | 1.2594                | 544.16                  |              |                       |                         |

## On determining the onset temperature of spin transition

Peaks or thermal anomalies on DSC curves can be characterized by the onset temperatures and the peak temperatures. The peak temperature is the temperature corresponding to the maximal rate of the thermal event whereas the onset temperature is the temperature at which a thermal event starts. Therefore it is preferable to use the onset temperature to compare DSC data. The onset temperature is determined by the intersection of the tangent of the peak with the baseline (Fig S25).

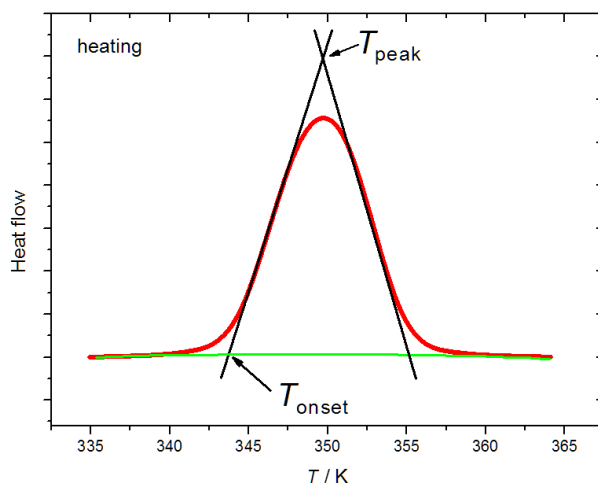

**Fig. S25** How to determine the onset temperature ( $T_{\text{onset}}$ ) and the peak temperature ( $T_{\text{peak}}$ ) for a heating process.

## On estimating entropies of spin transition

Here we would like to show our procedure of calculating entropies of spin transition. (i) The area of anomaly is divided into parts or segments (Fig. S26). (ii) Enthalpy of a segment is divided by the mean temperature of this segment. This yields entropy of this segment. (iii) Summing entropies of all segments we get entropy.

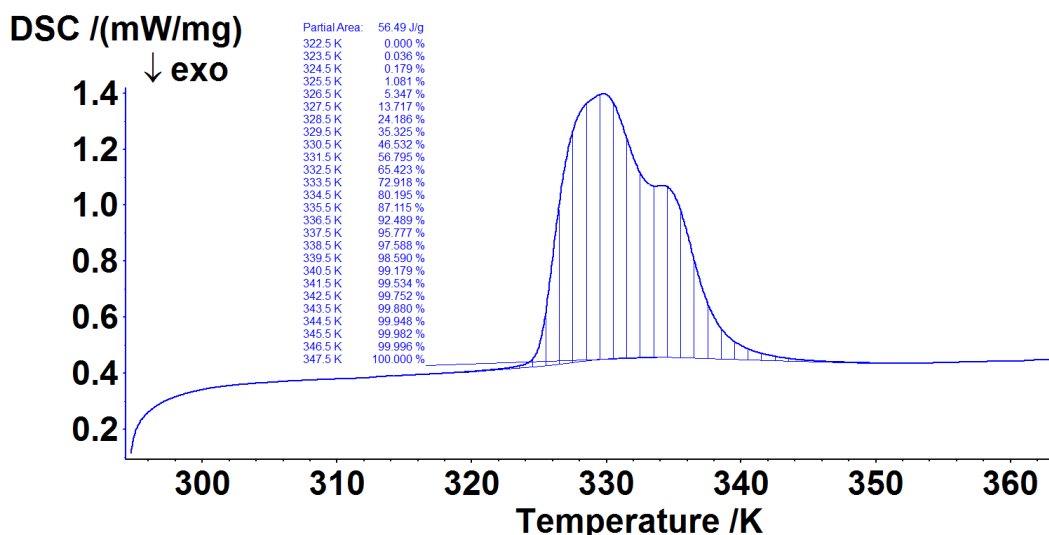

**Fig. S26** Dividing the thermal anomaly into segments.

Let us consider this procedure in more details. An example of calculations is shown in Fig. S27. The C1 cell (Fig. S27) is enthalpy expressed in J g<sup>-1</sup>; the D1 cell is molar weight of Fe(ATrz)<sub>3</sub>(NO<sub>3</sub>)<sub>2</sub>·1.25H<sub>2</sub>O. Column B (Fig. S27) is partial area of the thermal anomaly (Fig. S26) corresponding to selected temperature (Column A, Fig. S27). Column C is partial enthalpy corresponding to a segment between the *i*<sup>th</sup> and (*i* – 1)<sup>th</sup> temperatures. Column D is partial entropy calculated by dividing partial enthalpy corresponding to a segment between the *i*<sup>th</sup> and (*i* – 1)<sup>th</sup> temperatures by the mean segment temperature, (*T<sub>i</sub>* – *T<sub>i-1</sub>*)/2. Summing all partial entropies we get entropy corresponding to the thermal anomaly (the D31 cell).

| C8                    |       |         |          |          |   |   |   | D8            |       |         |          |          |   |   |   |
|-----------------------|-------|---------|----------|----------|---|---|---|---------------|-------|---------|----------|----------|---|---|---|
| =SC\$1*\$D\$1*(B8-B7) |       |         |          |          |   |   |   | =2*C8/(A8+A7) |       |         |          |          |   |   |   |
| A                     | B     | C       | D        | E        | F | G | H | A             | B     | C       | D        | E        | F | G | H |
| 1                     | 319.5 | 0       | 56.49    | 454.61   |   |   |   | 1             | 319.5 | 0       | 56.49    | 454.61   |   |   |   |
| 2                     | 320.5 | 0.000%  | 0        | 0        |   |   |   | 2             | 320.5 | 0.000%  | 0        | 0        |   |   |   |
| 3                     | 321.5 | 0.000%  | 0        | 0        |   |   |   | 3             | 321.5 | 0.000%  | 0        | 0        |   |   |   |
| 4                     | 322.5 | 0.000%  | 0        | 0        |   |   |   | 4             | 322.5 | 0.000%  | 0        | 0        |   |   |   |
| 5                     | 323.5 | 0.036%  | 9.245131 | 0.028623 |   |   |   | 5             | 323.5 | 0.036%  | 9.245131 | 0.028623 |   |   |   |
| 6                     | 324.5 | 0.179%  | 36.72371 | 0.113345 |   |   |   | 6             | 324.5 | 0.179%  | 36.72371 | 0.113345 |   |   |   |
| 7                     | 325.5 | 1.081%  | 231.6419 | 0.712744 |   |   |   | 7             | 325.5 | 1.081%  | 231.6419 | 0.712744 |   |   |   |
| 8                     | 326.5 | 5.347%  | 1095.548 | 3.360577 |   |   |   | 8             | 326.5 | 5.347%  | 1095.548 | 3.360577 |   |   |   |
| 9                     | 327.5 | 13.717% | 2149.493 | 6.573373 |   |   |   | 9             | 327.5 | 13.717% | 2149.493 | 6.573373 |   |   |   |
| 10                    | 328.5 | 24.186% | 2688.535 | 8.196754 |   |   |   | 10            | 328.5 | 24.186% | 2688.535 | 8.196754 |   |   |   |
| 11                    | 329.5 | 35.325% | 2860.598 | 8.694825 |   |   |   | 11            | 329.5 | 35.325% | 2860.598 | 8.694825 |   |   |   |
| 12                    | 330.5 | 46.532% | 2878.061 | 8.721396 |   |   |   | 12            | 330.5 | 46.532% | 2878.061 | 8.721396 |   |   |   |
| 13                    | 331.5 | 56.795% | 2635.633 | 7.962637 |   |   |   | 13            | 331.5 | 56.795% | 2635.633 | 7.962637 |   |   |   |
| 14                    | 332.5 | 65.423% | 2215.75  | 6.673945 |   |   |   | 14            | 332.5 | 65.423% | 2215.75  | 6.673945 |   |   |   |
| 15                    | 333.5 | 72.918% | 1924.785 | 5.780135 |   |   |   | 15            | 333.5 | 72.918% | 1924.785 | 5.780135 |   |   |   |
| 16                    | 334.5 | 80.195% | 1868.8   | 5.595211 |   |   |   | 16            | 334.5 | 80.195% | 1868.8   | 5.595211 |   |   |   |
| 17                    | 335.5 | 87.115% | 1777.12  | 5.304835 |   |   |   | 17            | 335.5 | 87.115% | 1777.12  | 5.304835 |   |   |   |
| 18                    | 336.5 | 92.489% | 1380.093 | 4.107418 |   |   |   | 18            | 336.5 | 92.489% | 1380.093 | 4.107418 |   |   |   |
| 19                    | 337.5 | 95.777% | 844.3886 | 2.505604 |   |   |   | 19            | 337.5 | 95.777% | 844.3886 | 2.505604 |   |   |   |
| 20                    | 338.5 | 97.588% | 465.0814 | 1.375981 |   |   |   | 20            | 338.5 | 97.588% | 465.0814 | 1.375981 |   |   |   |
| 21                    | 339.5 | 98.590% | 257.3228 | 0.759064 |   |   |   | 21            | 339.5 | 98.590% | 257.3228 | 0.759064 |   |   |   |
| 22                    | 340.5 | 99.179% | 151.2606 | 0.444884 |   |   |   | 22            | 340.5 | 99.179% | 151.2606 | 0.444884 |   |   |   |
| 23                    | 341.5 | 99.534% | 91.16726 | 0.267353 |   |   |   | 23            | 341.5 | 99.534% | 91.16726 | 0.267353 |   |   |   |
| 24                    | 342.5 | 99.752% | 55.9844  | 0.163697 |   |   |   | 24            | 342.5 | 99.752% | 55.9844  | 0.163697 |   |   |   |
| 25                    | 343.5 | 99.880% | 32.87158 | 0.095835 |   |   |   | 25            | 343.5 | 99.880% | 32.87158 | 0.095835 |   |   |   |
| 26                    | 344.5 | 99.948% | 17.46302 | 0.050765 |   |   |   | 26            | 344.5 | 99.948% | 17.46302 | 0.050765 |   |   |   |
| 27                    | 345.5 | 99.982% | 8.731512 | 0.025309 |   |   |   | 27            | 345.5 | 99.982% | 8.731512 | 0.025309 |   |   |   |
| 28                    | 346.5 | 99.996% | 3.595329 | 0.010391 |   |   |   | 28            | 346.5 | 99.996% | 3.595329 | 0.010391 |   |   |   |
| 29                    | 347.5 | 100.00% | 1.027237 | 0.00296  |   |   |   | 29            | 347.5 | 100.00% | 1.027237 | 0.00296  |   |   |   |
| 30                    |       |         |          |          |   |   |   | 30            |       |         |          |          |   |   |   |
| 31                    |       |         | 25680.92 | 77.52766 |   |   |   | 31            |       |         | 25680.92 | 77.52766 |   |   |   |
| 32                    |       |         |          |          |   |   |   | 32            |       |         |          |          |   |   |   |

**Fig. S27** Calculating entropy for the thermal anomaly depicted in Fig. S26.

## On fitting the DSC curves

DSC curves as they are can be analyzed using commercially available Netzsch Thermokinetics software. These curves can be processed using either model-free or model based methods to calculate kinetic parameters. Description of this software can be found at <https://www.netzsch-thermal-analysis.com/en/products-solutions/software/netzsch-advanced-software/thermokinetics/#!/#c278832>

General methodology of both model-free analysis and model based analysis is described in “ICTAC Kinetics Committee recommendations for performing kinetic computations on thermal analysis data” by S. Vyazovkin, A. K. Burnham, J. M. Criado, L. A. Pérez-Maqueda, C. Popescu and N. Sbirrazzuoli, *Thermochimica Acta*, 2011, **520**, 1–19.

The rate of a process,  $d\alpha/dt$ , depends on temperature and on the extent of conversion,

$$\frac{d\alpha}{dt} = k(T)f(\alpha),$$

where  $k(T)$  is the rate constant and  $f(\alpha)$  is the reaction model. In most cases the rate constant is parametrized using the well-known Arrhenius equation,

$$k(T) = Ae^{\left(-\frac{E_a}{RT}\right)}.$$

The reaction model,  $f(\alpha)$ , depends upon the type of reaction, *i.e.* on whether the reaction is cooperative (sigmoidal), decelerating or accelerating.

To calculate the activation energy of a process using non-isothermal DSC data it is desirable to have a series of DSC curves recorded at three or more different scan rates. We have made such experiments (sample **10**, Table S3) but, although each individual DSC curve can successfully be processed with the Netzsch Thermokinetics software, the multiple data sets cannot be fitted simultaneously (this situation is analogous to the one observed in our previous study, M. B. Bushuev, D. P. Pishchur, E. B. Nikolaenkova and V. P. Krivopalov, *Phys. Chem. Chem. Phys.*, 2016, **18**, 16690—16699.). Probably the activation barrier height and pre-exponential factor are indeed not constant for the system under discussion and vary from cycle to cycle due to evolution of the complex upon thermal cycling (not an uncommon situation for spin crossover complexes): even at one and the same scan rate we observe noticeable variations in the  $T_{\text{onset}}$  values, enthalpies and entropies of spin transition (Table S3). Therefore we consider the kinetic parameters listed in Table S3 to be estimates.

# Sample 10 / cycle 3 / CnB

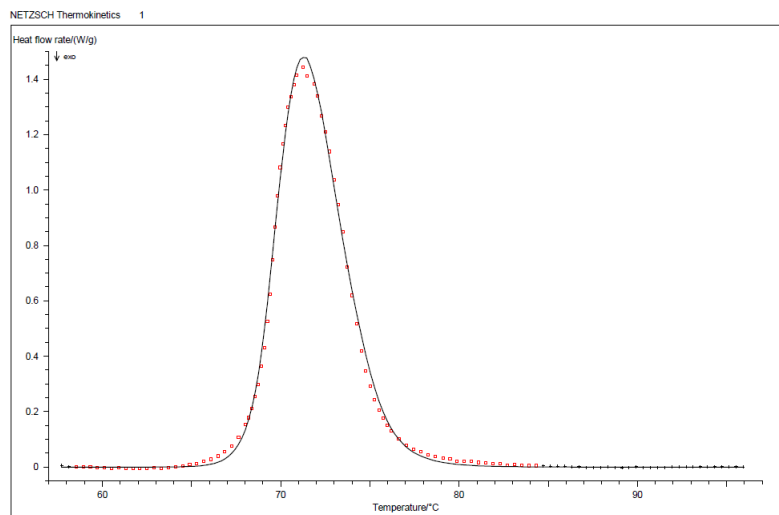

## NETZSCH Thermokinetics

Date/Time: 03.10.2016 at 14:09

Project: 1

Model 1: n-th order with autocatalysis by B

A → B

Start evaluation: 0.00050

Measurement type: DSC

Fine evaluation: 0.99950

SCAN 1

Identity:

OP 320 10.11.2015 12:52:35/Segm.S1/1

Transfer Corr: 204\_F1.kcr

Min. Temp/°C: 57.7203

Min. Time/min: 0.0

Max. Temp/°C: 95.9370

Max. Time/min: 4.2651

Heating rate/(K/min): 8.960

Sampling time/s: 1.340

Sample mass/mg: 4.960

Base line type: tangent area prop.

LeftPts: 40 RightPts: 50

## PARAMETERS AND STANDARD DEVIATIONS

| # | Parameter              | Initial Val. | Optimum Val. | Minimum | Maximum | Sign | t*Std.Dev. |
|---|------------------------|--------------|--------------|---------|---------|------|------------|
| 0 | log A1/s <sup>-1</sup> | 62.7548      | 198.4512     |         |         |      | 0.5069     |
| 1 | E1 kJ/mol              | 423.2783     | 1312.6495    |         |         | +    | 3.5380     |
| 2 | React.ord. 1           | 1.5889       | 2.9619       |         |         | +    | 0.1734     |
| 3 | log Kcat 1             | 0.4500       | -2.3904      |         |         |      | 45.1319    |
| 4 | Area 1/(J/g)           | 47.1725      | 47.1725      |         |         |      | constant   |

## STATISTICS

|                          |            |                       |          |
|--------------------------|------------|-----------------------|----------|
| Least squares:           | 1.59459    | Number of cycles:     | 50       |
| Mean of residues:        | 9.11327E-2 | Max.No of cycles:     | 50       |
| Correlation coefficient: | 0.998783   | Rel. precision:       | 0.001000 |
| Durbin-Watson Value:     | 0.200      | t-critical(0.95;127): | 1.970    |
| Durbin-Watson Factor:    | 2.295      |                       |          |

## F-TEST ON FIT-QUALITY

| #  | Code | Fexp   | Fcrit(0.95) | f-act | Type 1 | Type 2 | Type 3 | Type 4 | Type 5 | Type 6 |
|----|------|--------|-------------|-------|--------|--------|--------|--------|--------|--------|
| 0  | s:   | 1.00   | 1.34        | 127   | Bna    |        |        |        |        |        |
| 1  | s:   | 1.08   | 1.34        | 128   | Fn     |        |        |        |        |        |
| 2  | s:   | 1.09   | 1.34        | 127   | Cn B   |        |        |        |        |        |
| 3  | s:   | 2.27   | 1.34        | 129   | B1     |        |        |        |        |        |
| 4  | s:   | 3.25   | 1.34        | 128   | C1 B   |        |        |        |        |        |
| 5  | s:   | 3.63   | 1.34        | 129   | F2     |        |        |        |        |        |
| 6  | s:   | 11.04  | 1.34        | 128   | An     |        |        |        |        |        |
| 7  | s:   | 15.05  | 1.34        | 129   | A2     |        |        |        |        |        |
| 8  | s:   | 21.49  | 1.34        | 129   | F1     |        |        |        |        |        |
| 9  | s:   | 38.83  | 1.34        | 129   | R3     |        |        |        |        |        |
| 10 | s:   | 46.27  | 1.34        | 129   | D1F    |        |        |        |        |        |
| 11 | s:   | 49.84  | 1.34        | 129   | D3F    |        |        |        |        |        |
| 12 | s:   | 51.16  | 1.34        | 129   | D3     |        |        |        |        |        |
| 13 | s:   | 54.03  | 1.34        | 129   | R2     |        |        |        |        |        |
| 14 | s:   | 73.45  | 1.34        | 129   | D4     |        |        |        |        |        |
| 15 | s:   | 95.51  | 1.34        | 129   | D2     |        |        |        |        |        |
| 16 | s:   | 141.04 | 1.34        | 129   | D1     |        |        |        |        |        |
| 17 | s:   | 224.28 | 1.34        | 129   | A3     |        |        |        |        |        |

# Sample 10 / cycle 4 / CnB

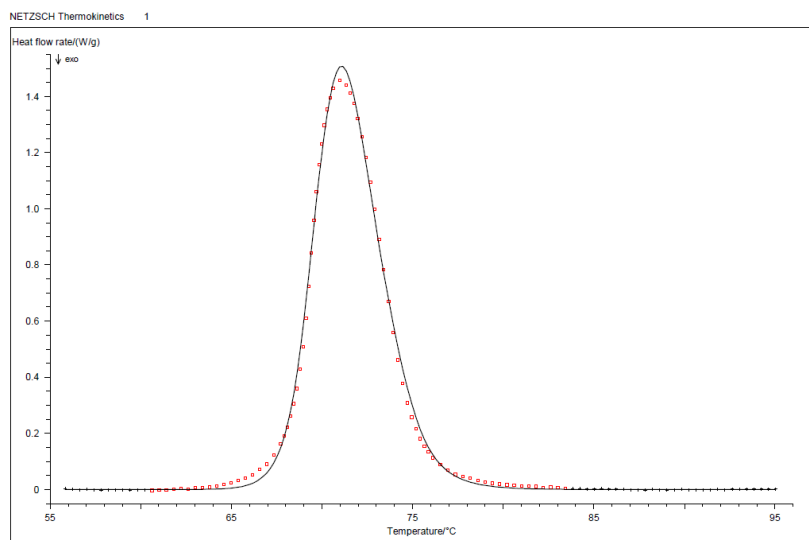

## NETZSCH Thermokinetics

Date/Time: 03.10.2016 at 14:11

Project: 1

Model 1: n-th order with autocatalysis by B

A → 1 → B

Start evaluation: 0.00050

Measurement type: DSC

Fine evaluation: 0.99950

SCAN 1

Identity:

OP 320 10.11.2015 13:42:51/Segm.S1/1

Transfer Corr: 204\_F1.kcr

Min. Temp/°C: 55.8306

Min. Time/min: 0.0

Max. Temp/°C: 95.0378

Max. Time/min: 4.3764

Heating rate/(K/min): 8.959

Sampling time/s: 1.340

Sample mass/mg: 4.960

Base line type: tangent area prop.

LeftPts: 40 RightPts: 50

## PARAMETERS AND STANDARD DEVIATIONS

| # | Parameter              | Initial Val. | Optimum Val. | Minimum | Maximum | Sign | t*Std.Dev. |
|---|------------------------|--------------|--------------|---------|---------|------|------------|
| 0 | log A1/s <sup>-1</sup> | 66.9980      | 180.5794     |         |         |      | 0.8291     |
| 1 | E1 kJ/mol              | 450.8694     | 1194.6979    |         |         | +    | 5.9225     |
| 2 | React.ord. 1           | 1.6180       | 2.7926       |         |         | +    | 0.2143     |
| 3 | log Kcat 1             | 0.4500       | -0.5035      |         |         |      | 1.2490     |
| 4 | Area 1/(J/g)           | 48.4120      | 48.4120      |         |         |      | constant   |

## STATISTICS

|                          |            |                       |          |
|--------------------------|------------|-----------------------|----------|
| Least squares:           | 1.79563    | Number of cycles:     | 32       |
| Mean of residues:        | 9.54718E-2 | Max.No of cycles:     | 50       |
| Correlation coefficient: | 0.998564   | Rel. precision:       | 0.001000 |
| Durbin-Watson Value:     | 0.121      | t-critical(0.95;111): | 1.973    |
| Durbin-Watson Factor:    | 2.923      |                       |          |

## F-TEST ON FIT-QUALITY

| #  | Code | Fexp   | Fcrit(0.95) | f-act | Type 1 | Type 2 | Type 3 | Type 4 | Type 5 | Type 6 |
|----|------|--------|-------------|-------|--------|--------|--------|--------|--------|--------|
| 0  | s:   | 1.00   | 1.37        | 111   | Bna    |        |        |        |        |        |
| 1  | s:   | 1.18   | 1.37        | 111   | Cn B   |        |        |        |        |        |
| 2  | s:   | 1.19   | 1.37        | 112   | Fn     |        |        |        |        |        |
| 3  | s:   | 2.38   | 1.37        | 112   | C1 B   |        |        |        |        |        |
| 4  | s:   | 2.95   | 1.37        | 113   | F2     |        |        |        |        |        |
| 5  | s:   | 8.23   | 1.37        | 113   | B1     |        |        |        |        |        |
| 6  | s:   | 10.26  | 1.37        | 112   | An     |        |        |        |        |        |
| 7  | s:   | 13.02  | 1.37        | 113   | A2     |        |        |        |        |        |
| 8  | s:   | 18.93  | 1.37        | 113   | F1     |        |        |        |        |        |
| 9  | s:   | 35.15  | 1.37        | 113   | R3     |        |        |        |        |        |
| 10 | s:   | 41.72  | 1.37        | 113   | D1F    |        |        |        |        |        |
| 11 | s:   | 45.50  | 1.37        | 113   | D3F    |        |        |        |        |        |
| 12 | s:   | 46.87  | 1.37        | 113   | D3     |        |        |        |        |        |
| 13 | s:   | 47.61  | 1.37        | 113   | R2     |        |        |        |        |        |
| 14 | s:   | 68.23  | 1.37        | 113   | D4     |        |        |        |        |        |
| 15 | s:   | 86.83  | 1.37        | 113   | D2     |        |        |        |        |        |
| 16 | s:   | 131.55 | 1.37        | 113   | D1     |        |        |        |        |        |
| 17 | s:   | 153.42 | 1.37        | 113   | A3     |        |        |        |        |        |

# Sample 10 / cycle 5 / CnB

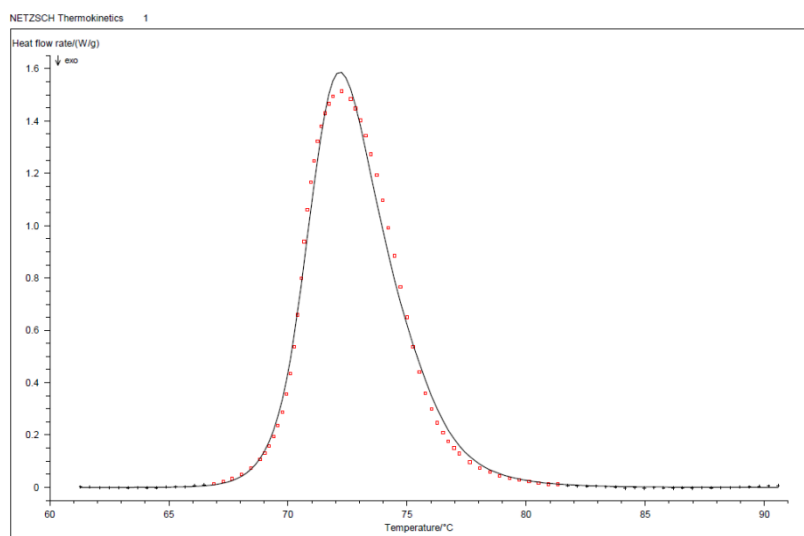

## NETZSCH Thermokinetics

Date/Time: 03.10.2016 at 14:29

Project: 1

Model 1: n-th order with autocatalysis by B

A → 1 → B

Start evaluation: 0.00050

Measurement type: DSC

Fine evaluation: 0.99950

SCAN 1

Identity:

OP 320 13.11.2015 11:11:38/Segm.S1/1

Transfer Corr: 204\_F1.kcr

Min. Temp/°C: 61.2856

Min. Time/min: 0.0

Max. Temp/°C: 90.5785

Max. Time/min: 3.2610

Heating rate/(K/min): 8.983

Sampling time/s: 1.340

Sample mass/mg: 4.880

Base line type: tangent area prop.

LeftPts: 25 RightPts: 40

## PARAMETERS AND STANDARD DEVIATIONS

| # | Parameter              | Initial Val. | Optimum Val. | Minimum | Maximum | Sign | t*Std.Dev. |
|---|------------------------|--------------|--------------|---------|---------|------|------------|
| 0 | log A1/s <sup>-1</sup> | 36.7256      | 182.6888     |         |         |      | 0.4430     |
| 1 | E1 kJ/mol              | 253.1038     | 1213.3336    |         |         | +    | 4.0331     |
| 2 | React.ord. 1           | 1.1768       | 3.1567       |         |         | +    | 0.2421     |
| 3 | log Kcat 1             | 0.4500       | 0.2175       |         |         |      | 0.6574     |
| 4 | Area 1/(J/g)           | 48.7560      | 48.7560      |         |         |      | constant   |

## STATISTICS

Least squares: 4.98360 Number of cycles: 50

Mean of residues: 0.18413 Max.No of cycles: 50

Correlation coefficient: 0.996520 Rel. precision: 0.001000

Durbin-Watson Value: 0.141 t-critical(0.95;70): 1.985

Durbin-Watson Factor: 2.712

## F-TEST ON FIT-QUALITY

| #  | Code | Fexp   | Fcrit(0.95) | f-act | Type 1 | Type 2 | Type 3 | Type 4 | Type 5 | Type 6 |
|----|------|--------|-------------|-------|--------|--------|--------|--------|--------|--------|
| 0  | s:   | 1.00   | 1.37        | 110   | Bna    |        |        |        |        |        |
| 1  | s:   | 1.03   | 1.37        | 111   | Fn     |        |        |        |        |        |
| 2  | s:   | 3.07   | 1.37        | 112   | B1     |        |        |        |        |        |
| 3  | s:   | 3.60   | 1.44        | 70    | Cn B   |        |        |        |        |        |
| 4  | s:   | 4.03   | 1.37        | 111   | C1 B   |        |        |        |        |        |
| 5  | s:   | 5.12   | 1.37        | 112   | F2     |        |        |        |        |        |
| 6  | s:   | 11.24  | 1.37        | 111   | An     |        |        |        |        |        |
| 7  | s:   | 16.08  | 1.37        | 112   | A2     |        |        |        |        |        |
| 8  | s:   | 22.79  | 1.37        | 112   | F1     |        |        |        |        |        |
| 9  | s:   | 38.52  | 1.37        | 112   | R3     |        |        |        |        |        |
| 10 | s:   | 46.56  | 1.37        | 112   | D1F    |        |        |        |        |        |
| 11 | s:   | 49.61  | 1.37        | 112   | D3F    |        |        |        |        |        |
| 12 | s:   | 50.66  | 1.37        | 112   | D3     |        |        |        |        |        |
| 13 | s:   | 52.17  | 1.37        | 112   | R2     |        |        |        |        |        |
| 14 | s:   | 70.27  | 1.37        | 112   | D4     |        |        |        |        |        |
| 15 | s:   | 86.99  | 1.37        | 112   | D2     |        |        |        |        |        |
| 16 | s:   | 113.28 | 1.37        | 112   | A3     |        |        |        |        |        |
| 17 | s:   | 129.15 | 1.37        | 112   | D1     |        |        |        |        |        |

# Sample 10 / cycle 6 / CnB

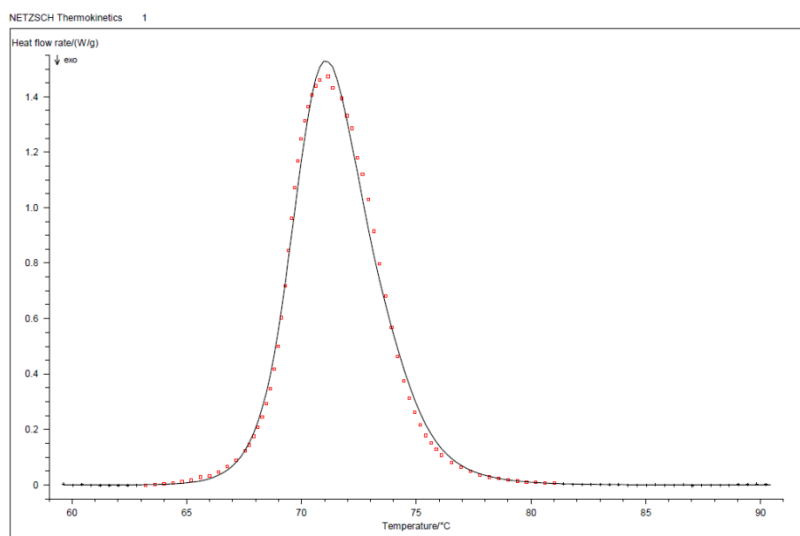

## NETZSCH Thermokinetics

Date/Time: 03.10.2016 at 14:31

Project: 1

Model 1: n-th order with autocatalysis by B

A → 1 → B

Start evaluation: 0.00050

Measurement type:

DSC

Fine evaluation: 0.99950

SCAN 1

Identity:

OP 320 13.11.2015 11:42:50/Segm.S1/1

Transfer Corr: 204\_F1.kcr

Min. Temp/°C: 59.6247

Min. Time/min:

0.0

Max. Temp/°C: 90.4359

Max. Time/min:

3.4390

Heating rate/(K/min): 8.959

Sampling time/s:

1.340

Sample mass/mg: 4.880

Base line type: tangent area prop.

LeftPts: 25

RightPts: 40

## PARAMETERS AND STANDARD DEVIATIONS

| # | Parameter              | Initial Val. | Optimum Val. | Minimum | Maximum | Sign | t*Std.Dev. |
|---|------------------------|--------------|--------------|---------|---------|------|------------|
| 0 | log A1/s <sup>-1</sup> | 42.2469      | 161.4637     |         |         |      | 1.5885     |
| 1 | E1 kJ/mol              | 288.5165     | 1069.9045    |         |         | +    | 11.3670    |
| 2 | React.ord. 1           | 1.2299       | 2.7628       |         |         | +    | 0.2168     |
| 3 | log Kcat 1             | 0.4500       | 0.1710       |         |         |      | 0.6099     |
| 4 | Area 1/(J/g)           | 47.8679      | 47.8679      |         |         |      | constant   |

## STATISTICS

Least squares: 3.47052

Number of cycles:

50

Mean of residues: 0.14963

Max.No of cycles:

50

Correlation coefficient: 0.997607

Rel. precision:

0.001000

Durbin-Watson Value: 0.186

t-critical(0.95;86):

1.979

Durbin-Watson Factor: 2.377

## F-TEST ON FIT-QUALITY

| #  | Code | Fexp   | Fcrit(0.95) | f-act | Type 1 | Type 2 | Type 3 | Type 4 | Type 5 | Type 6 |
|----|------|--------|-------------|-------|--------|--------|--------|--------|--------|--------|
| 0  | s:   | 1.00   | 1.43        | 86    | Bna    |        |        |        |        |        |
| 1  | s:   | 1.14   | 1.43        | 87    | Fn     |        |        |        |        |        |
| 2  | s:   | 1.85   | 1.43        | 86    | Cn B   |        |        |        |        |        |
| 3  | s:   | 2.37   | 1.43        | 88    | B1     |        |        |        |        |        |
| 4  | s:   | 2.42   | 1.43        | 87    | C1 B   |        |        |        |        |        |
| 5  | s:   | 3.24   | 1.43        | 88    | F2     |        |        |        |        |        |
| 6  | s:   | 8.43   | 1.43        | 87    | An     |        |        |        |        |        |
| 7  | s:   | 13.85  | 1.43        | 88    | A2     |        |        |        |        |        |
| 8  | s:   | 20.61  | 1.43        | 88    | F1     |        |        |        |        |        |
| 9  | s:   | 37.86  | 1.43        | 88    | R3     |        |        |        |        |        |
| 10 | s:   | 45.89  | 1.43        | 88    | D1F    |        |        |        |        |        |
| 11 | s:   | 49.26  | 1.43        | 88    | D3F    |        |        |        |        |        |
| 12 | s:   | 50.35  | 1.43        | 88    | D3     |        |        |        |        |        |
| 13 | s:   | 50.92  | 1.43        | 88    | R2     |        |        |        |        |        |
| 14 | s:   | 73.56  | 1.43        | 88    | D4     |        |        |        |        |        |
| 15 | s:   | 91.62  | 1.43        | 88    | D2     |        |        |        |        |        |
| 16 | s:   | 100.59 | 1.43        | 88    | A3     |        |        |        |        |        |
| 17 | s:   | 136.16 | 1.43        | 88    | D1     |        |        |        |        |        |

# Sample 10 / cycle 7 / CnB

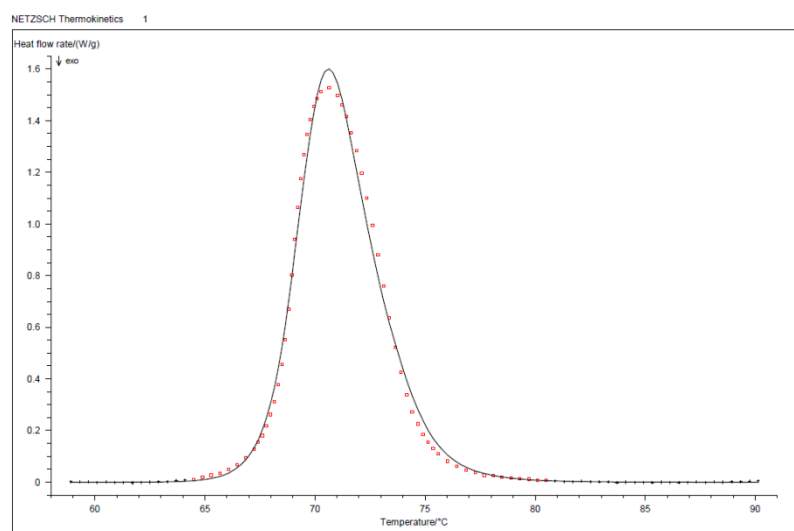

## NETZSCH Thermokinetics

Date/Time: 03.10.2016 at 14:32

Project: 1

Model 1: n-th order with autocatalysis by B

A → 1 → B

Start evaluation: 0.00050

Measurement type: DSC

Fine evaluation: 0.99950

SCAN 1 Identity:

OP 320 16.11.2015 12:05:47/Segm.S1/1

Transfer Corr: 204\_F1.kcr

Min. Temp/°C: 58.9123

Min. Time/min: 0.0

Max. Temp/°C: 90.1313

Max. Time/min: 3.4841

Heating rate/(K/min): 8.960

Sampling time/s: 1.340

Sample mass/mg: 4.830

Base line type: tangent area prop.

LeftPts: 25 RightPts: 40

## PARAMETERS AND STANDARD DEVIATIONS

| # | Parameter              | Initial Val. | Optimum Val. | Minimum | Maximum | Sign | t*Std.Dev. |
|---|------------------------|--------------|--------------|---------|---------|------|------------|
| 0 | log A1/s <sup>-1</sup> | 42.7965      | 167.4181     |         |         |      | 0.7189     |
| 1 | E1 kJ/mol              | 291.7231     | 1107.6489    |         |         | +    | 5.7049     |
| 2 | React.ord. 1           | 1.2320       | 2.8614       |         |         | +    | 0.2088     |
| 3 | log Kcat 1             | 0.4500       | 0.2228       |         |         |      | 0.5825     |
| 4 | Area 1/(J/g)           | 49.2580      | 49.2580      |         |         |      | constant   |

## STATISTICS

|                          |          |                      |          |
|--------------------------|----------|----------------------|----------|
| Least squares:           | 4.61835  | Number of cycles:    | 50       |
| Mean of residues:        | 0.17151  | Max.No of cycles:    | 50       |
| Correlation coefficient: | 0.996858 | Rel. precision:      | 0.001000 |
| Durbin-Watson Value:     | 0.138    | t-critical(0.95;78): | 1.982    |
| Durbin-Watson Factor:    | 2.736    |                      |          |

## F-TEST ON FIT-QUALITY

| #  | Code | Fexp   | Fcrit(0.95) | f-act | Type 1 | Type 2 | Type 3 | Type 4 | Type 5 | Type 6 |
|----|------|--------|-------------|-------|--------|--------|--------|--------|--------|--------|
| 0  | s:   | 1.00   | 1.43        | 86    | Bna    |        |        |        |        |        |
| 1  | s:   | 1.14   | 1.43        | 87    | Fn     |        |        |        |        |        |
| 2  | s:   | 2.37   | 1.43        | 88    | B1     |        |        |        |        |        |
| 3  | s:   | 2.42   | 1.43        | 87    | C1 B   |        |        |        |        |        |
| 4  | s:   | 2.72   | 1.45        | 78    | Cn B   |        |        |        |        |        |
| 5  | s:   | 3.24   | 1.43        | 88    | F2     |        |        |        |        |        |
| 6  | s:   | 8.43   | 1.43        | 87    | An     |        |        |        |        |        |
| 7  | s:   | 13.85  | 1.43        | 88    | A2     |        |        |        |        |        |
| 8  | s:   | 20.61  | 1.43        | 88    | F1     |        |        |        |        |        |
| 9  | s:   | 37.86  | 1.43        | 88    | R3     |        |        |        |        |        |
| 10 | s:   | 45.89  | 1.43        | 88    | D1F    |        |        |        |        |        |
| 11 | s:   | 49.26  | 1.43        | 88    | D3F    |        |        |        |        |        |
| 12 | s:   | 50.35  | 1.43        | 88    | D3     |        |        |        |        |        |
| 13 | s:   | 50.92  | 1.43        | 88    | R2     |        |        |        |        |        |
| 14 | s:   | 73.56  | 1.43        | 88    | D4     |        |        |        |        |        |
| 15 | s:   | 91.62  | 1.43        | 88    | D2     |        |        |        |        |        |
| 16 | s:   | 100.59 | 1.43        | 88    | A3     |        |        |        |        |        |
| 17 | s:   | 136.16 | 1.43        | 88    | D1     |        |        |        |        |        |

# Sample 10 / cycle 8 / CnB

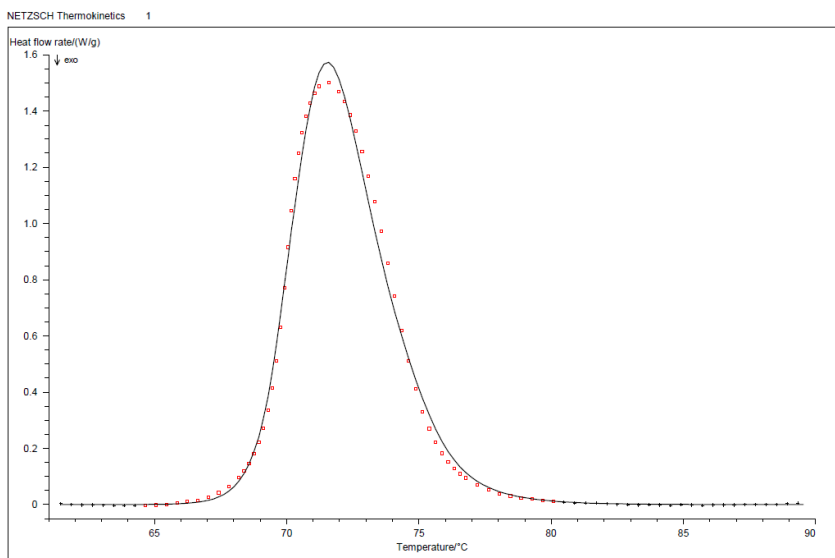

## NETZSCH Thermokinetics

Date/Time: 03.10.2016 at 14:38

Project: 1

Model 1: n-th order with autocatalysis by B

A → B

Start evaluation: 0.00050

Measurement type: DSC

Fine evaluation: 0.99950

SCAN 1

Identity:

OP 320 16.11.2015 10:59:19/Segm.S1/2

Transfer Cor: 204\_F1.kcr

Min. Temp/°C: 61.4655

Min. Time/min: 0.0

Max. Temp/°C: 89.5271

Max. Time/min: 3.1371

Heating rate/(K/min): 8.945

Sampling time/s: 1.344

Sample mass/mg: 4.960

Base line type: tangent area prop.

LeftPts: 25

RightPts: 40

## PARAMETERS AND STANDARD DEVIATIONS

| # | Parameter              | Initial Val. | Optimum Val. | Minimum | Maximum | Sign | t*Std.Dev. |
|---|------------------------|--------------|--------------|---------|---------|------|------------|
| 0 | log A1/s <sup>-1</sup> | 29.1559      | 217.1536     |         |         |      | 0.7047     |
| 1 | E1 kJ/mol              | 202.8362     | 1437.0117    |         |         | +    | 5.4361     |
| 2 | React.ord. 1           | 1.0561       | 3.3075       |         |         | +    | 0.3575     |
| 3 | log Kcat 1             | 0.4500       | -0.2838      |         |         |      | 1.3574     |
| 4 | Area 1/(J/g)           | 47.5138      | 47.5138      |         |         |      | constant   |

## STATISTICS

|                          |          |                      |          |
|--------------------------|----------|----------------------|----------|
| Least squares:           | 4.27825  | Number of cycles:    | 50       |
| Mean of residues:        | 0.17419  | Max.No of cycles:    | 50       |
| Correlation coefficient: | 0.997287 | Rel. precision:      | 0.001000 |
| Durbin-Watson Value:     | 0.156    | t-critical(0.95;76): | 1.983    |
| Durbin-Watson Factor:    | 2.584    |                      |          |

## F-TEST ON FIT-QUALITY

| #  | Code | Fexp   | Fcrit(0.95) | f-act | Type 1 | Type 2 | Type 3 | Type 4 | Type 5 | Type 6 |
|----|------|--------|-------------|-------|--------|--------|--------|--------|--------|--------|
| 0  | s:   | 1.00   | 1.43        | 86    | Bna    |        |        |        |        |        |
| 1  | s:   | 1.14   | 1.43        | 87    | Fn     |        |        |        |        |        |
| 2  | s:   | 2.37   | 1.43        | 88    | B1     |        |        |        |        |        |
| 3  | s:   | 2.42   | 1.43        | 87    | C1 B   |        |        |        |        |        |
| 4  | s:   | 2.59   | 1.45        | 76    | Cn B   |        |        |        |        |        |
| 5  | s:   | 3.24   | 1.43        | 88    | F2     |        |        |        |        |        |
| 6  | s:   | 8.43   | 1.43        | 87    | An     |        |        |        |        |        |
| 7  | s:   | 13.85  | 1.43        | 88    | A2     |        |        |        |        |        |
| 8  | s:   | 20.61  | 1.43        | 88    | F1     |        |        |        |        |        |
| 9  | s:   | 37.86  | 1.43        | 88    | R3     |        |        |        |        |        |
| 10 | s:   | 45.89  | 1.43        | 88    | D1F    |        |        |        |        |        |
| 11 | s:   | 49.26  | 1.43        | 88    | D3F    |        |        |        |        |        |
| 12 | s:   | 50.35  | 1.43        | 88    | D3     |        |        |        |        |        |
| 13 | s:   | 50.92  | 1.43        | 88    | R2     |        |        |        |        |        |
| 14 | s:   | 73.56  | 1.43        | 88    | D4     |        |        |        |        |        |
| 15 | s:   | 91.62  | 1.43        | 88    | D2     |        |        |        |        |        |
| 16 | s:   | 100.59 | 1.43        | 88    | A3     |        |        |        |        |        |
| 17 | s:   | 136.16 | 1.43        | 88    | D1     |        |        |        |        |        |

# Sample 10 / cycle 9 / CnB

NETZSCH Thermokinetics 1

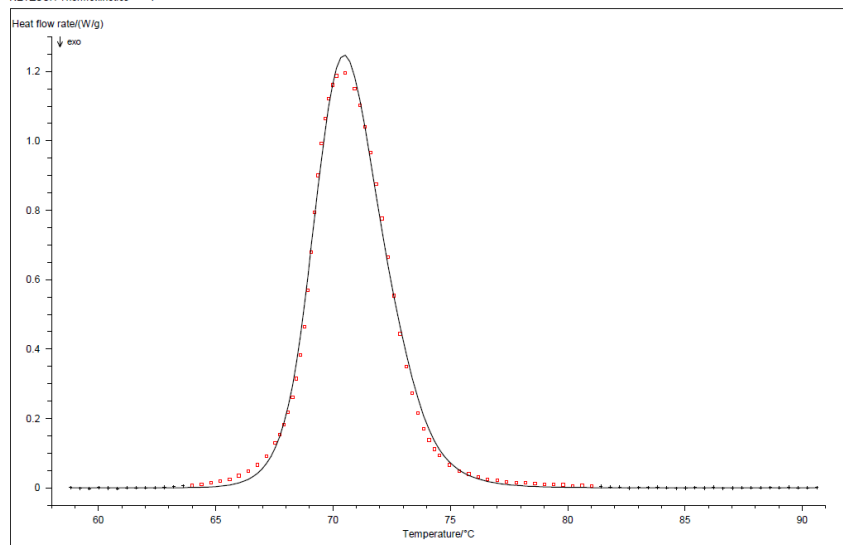

## NETZSCH Thermokinetics

Date/Time: 03.10.2016 at 14:34

Project: 1

Model 1: n-th order with autocatalysis by B

A → B

Start evaluation: 0.00050

Measurement type: DSC

Fine evaluation: 0.99950

SCAN 1

Identity:

OP 320 16.11.2015 12:37:39/Segm.S1/1

Transfer Corr: 204\_F1.kcr

Min. Temp/°C: 58.8196

Min. Time/min: 0.0

Max. Temp/°C: 90.6281

Max. Time/min: 5.3235

Heating rate/(K/min): 5.975

Sampling time/s: 2.009

Sample mass/mg: 4.830

Base line type: tangent area prop.

LeftPts: 20 RightPts: 40

## PARAMETERS AND STANDARD DEVIATIONS

| # | Parameter              | Initial Val. | Optimum Val. | Minimum | Maximum | Sign | t*Std.Dev. |
|---|------------------------|--------------|--------------|---------|---------|------|------------|
| 0 | log A1/s <sup>-1</sup> | 83.2593      | 198.4490     |         |         |      | 2.3612     |
| 1 | E1 kJ/mol              | 557.5248     | 1311.3948    |         |         | +    | 16.5442    |
| 2 | React.ord. 1           | 1.6531       | 2.7134       |         |         | +    | 0.2948     |
| 3 | log Kcat 1             | 0.4500       | -6.9987E-2   |         |         |      | 1.0641     |
| 4 | Area 1/(J/g)           | 49.2407      | 49.2407      |         |         |      | constant   |

## STATISTICS

Least squares: 1.40438

Number of cycles: 24

Mean of residues: 9.36878E-2

Max.No of cycles: 50

Correlation coefficient: 0.998291

Rel. precision: 0.001000

Durbin-Watson Value: 0.179

t-critical(0.95;84): 1.980

Durbin-Watson Factor: 2.415

## F-TEST ON FIT-QUALITY

| #  | Code | Fexp   | Fcrit(0.95) | f-act | Type 1 | Type 2 | Type 3 | Type 4 | Type 5 | Type 6 |
|----|------|--------|-------------|-------|--------|--------|--------|--------|--------|--------|
| 0  | s:   | 1.00   | 1.44        | 84    | Cn B   |        |        |        |        |        |
| 1  | s:   | 1.30   | 1.43        | 86    | Bna    |        |        |        |        |        |
| 2  | s:   | 1.48   | 1.43        | 87    | Fn     |        |        |        |        |        |
| 3  | s:   | 3.09   | 1.43        | 88    | B1     |        |        |        |        |        |
| 4  | s:   | 3.15   | 1.43        | 87    | C1 B   |        |        |        |        |        |
| 5  | s:   | 4.21   | 1.43        | 88    | F2     |        |        |        |        |        |
| 6  | s:   | 10.98  | 1.43        | 87    | An     |        |        |        |        |        |
| 7  | s:   | 18.04  | 1.43        | 88    | A2     |        |        |        |        |        |
| 8  | s:   | 26.84  | 1.43        | 88    | F1     |        |        |        |        |        |
| 9  | s:   | 49.31  | 1.43        | 88    | R3     |        |        |        |        |        |
| 10 | s:   | 59.76  | 1.43        | 88    | D1F    |        |        |        |        |        |
| 11 | s:   | 64.16  | 1.43        | 88    | D3F    |        |        |        |        |        |
| 12 | s:   | 65.58  | 1.43        | 88    | D3     |        |        |        |        |        |
| 13 | s:   | 66.32  | 1.43        | 88    | R2     |        |        |        |        |        |
| 14 | s:   | 95.80  | 1.43        | 88    | D4     |        |        |        |        |        |
| 15 | s:   | 119.33 | 1.43        | 88    | D2     |        |        |        |        |        |
| 16 | s:   | 131.01 | 1.43        | 88    | A3     |        |        |        |        |        |
| 17 | s:   | 177.33 | 1.43        | 88    | D1     |        |        |        |        |        |

# Sample 10 / cycle 10 / CnB

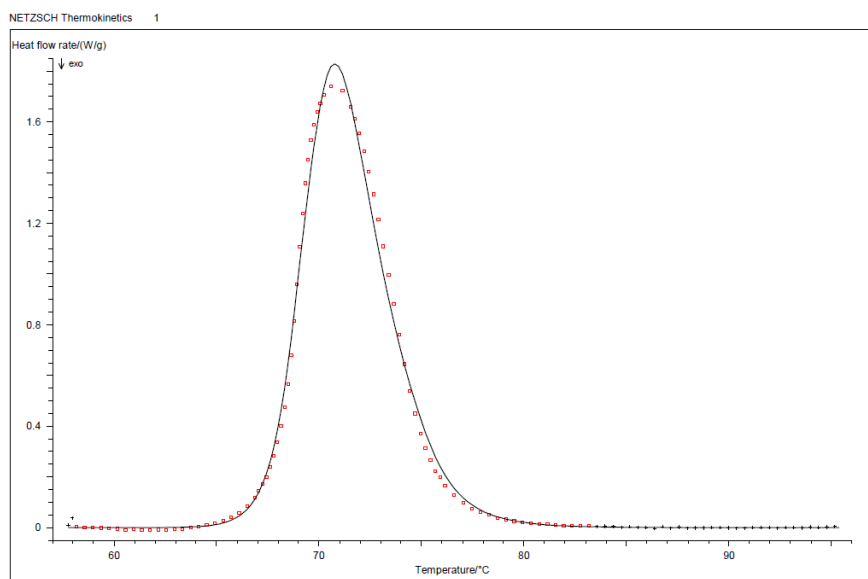

## NETZSCH Thermokinetics

Date/Time: 03.10.2016 at 14:39

Project: 1

Model 1: n-th order with autocatalysis by B

A → 1 → B

Start evaluation: 0.00050

Measurement type: DSC

Fine evaluation: 0.99950

SCAN 1 Identity: OP 320 16.11.2015 13:22:15/Segm.S1/1

Transfer Corr: 204\_F1.kcr

Min. Temp/°C: 57.7655

Min. Time/min: 0.0

Max. Temp/°C: 95.3703

Max. Time/min: 3.1468

Heating rate/(K/min): 11.950

Sampling time/s: 1.004

Sample mass/mg: 4.830

Base line type: tangent area prop.

LeftPts: 40 RightPts: 50

## PARAMETERS AND STANDARD DEVIATIONS

| # | Parameter              | Initial Val. | Optimum Val. | Minimum | Maximum | Sign | t*Std.Dev. |
|---|------------------------|--------------|--------------|---------|---------|------|------------|
| 0 | log A1/s <sup>-1</sup> | 22.1401      | 171.0874     |         |         |      | 0.9772     |
| 1 | E1 kJ/mol              | 155.8758     | 1130.7518    |         |         | +    | 7.3654     |
| 2 | React.ord. 1           | 1.0209       | 3.1185       |         |         | +    | 0.3182     |
| 3 | log Kcat 1             | 0.4500       | -9.7555E-2   |         |         |      | 1.0560     |
| 4 | Area 1/(J/g)           | 48.2557      | 48.2557      |         |         |      | constant   |

## STATISTICS

Least squares: 5.60612 Number of cycles: 50

Mean of residues: 0.17223 Max.No of cycles: 50

Correlation coefficient: 0.997437 Rel. precision: 0.001000

Durbin-Watson Value: 0.117 t-critical(0.95;123): 1.970

Durbin-Watson Factor: 2.968

## F-TEST ON FIT-QUALITY

| #  | Code | Fexp   | Fcrit(0.95) | f-act | Type 1 | Type 2 | Type 3 | Type 4 | Type 5 | Type 6 |
|----|------|--------|-------------|-------|--------|--------|--------|--------|--------|--------|
| 0  | s:   | 1.00   | 1.43        | 86    | Bna    |        |        |        |        |        |
| 1  | s:   | 1.14   | 1.43        | 87    | Fn     |        |        |        |        |        |
| 2  | s:   | 2.09   | 1.38        | 123   | Cn B   |        |        |        |        |        |
| 3  | s:   | 2.37   | 1.43        | 88    | B1     |        |        |        |        |        |
| 4  | s:   | 2.42   | 1.43        | 87    | C1 B   |        |        |        |        |        |
| 5  | s:   | 3.24   | 1.43        | 88    | F2     |        |        |        |        |        |
| 6  | s:   | 8.43   | 1.43        | 87    | An     |        |        |        |        |        |
| 7  | s:   | 13.85  | 1.43        | 88    | A2     |        |        |        |        |        |
| 8  | s:   | 20.61  | 1.43        | 88    | F1     |        |        |        |        |        |
| 9  | s:   | 37.86  | 1.43        | 88    | R3     |        |        |        |        |        |
| 10 | s:   | 45.89  | 1.43        | 88    | D1F    |        |        |        |        |        |
| 11 | s:   | 49.26  | 1.43        | 88    | D3F    |        |        |        |        |        |
| 12 | s:   | 50.35  | 1.43        | 88    | D3     |        |        |        |        |        |
| 13 | s:   | 50.92  | 1.43        | 88    | R2     |        |        |        |        |        |
| 14 | s:   | 73.56  | 1.43        | 88    | D4     |        |        |        |        |        |
| 15 | s:   | 91.62  | 1.43        | 88    | D2     |        |        |        |        |        |
| 16 | s:   | 100.59 | 1.43        | 88    | A3     |        |        |        |        |        |
| 17 | s:   | 136.16 | 1.43        | 88    | D1     |        |        |        |        |        |

## NETZSCH Thermokinetics

Date/Time: 02.10.2016 at 16:44

Project: 1

Model 1: n-th order with autocatalysis by B

A → 1 → B

Start evaluation: 0.00050

Measurement type: DSC

Fine evaluation: 0.99950

SCAN 1 Identity: 204\_F1.kcr OP320 21.04.2016 17:11:05/Segm.S2/3

Transfer Corr: 204\_F1.kcr

Min. Temp/°C: 62.4091

Min. Time/min: 0.0

Max. Temp/°C: 90.6858

Max. Time/min: 3.1457

Heating rate/(K/min): 8.989

Sampling time/s: 1.339

Sample mass/mg: 3.870

Base line type: tangent area prop.

LeftPts: 30

RightPts: 40

## PARAMETERS AND STANDARD DEVIATIONS

| # | Parameter              | Initial Val. | Optimum Val. | Minimum | Maximum | Sign | t*Std.Dev. |
|---|------------------------|--------------|--------------|---------|---------|------|------------|
| 0 | log A1/s <sup>-1</sup> | 30.4715      | 210.4873     |         |         |      | 2.4210E-2  |
| 1 | E1 kJ/mol              | 212.4624     | 1399.5238    |         |         | +    | 0.3253     |
| 2 | React.ord. 1           | 0.9910       | 2.7788       |         |         | +    | 0.1696     |
| 3 | log Kcat 1             | 0.4500       | -4.0000      |         |         |      | constant   |
| 4 | Area 1/(J/g)           | 51.5822      | 51.5822      |         |         |      | constant   |

## STATISTICS

Least squares: 4.58571 Number of cycles: 21

Mean of residues: 0.17970 Max.No of cycles: 50

Correlation coefficient: 0.997695 Rel. precision: 0.001000

Durbin-Watson Value: 0.203 t-critical(0.95;76): 1.983

Durbin-Watson Factor: 2.278

## F-TEST ON FIT-QUALITY

| #  | Code | Fexp  | Fcrit(0.95) | f-act | Type 1 | Type 2 | Type 3 | Type 4 | Type 5 | Type 6 |
|----|------|-------|-------------|-------|--------|--------|--------|--------|--------|--------|
| 0  | s:   | 1.00  | 1.46        | 76    | Cn B   |        |        |        |        |        |
| 1  | s:   | 1.32  | 1.46        | 80    | Fn     |        |        |        |        |        |
| 2  | s:   | 2.54  | 1.49        | 67    | F2     |        |        |        |        |        |
| 3  | s:   | 3.06  | 1.49        | 66    | C1 B   |        |        |        |        |        |
| 4  | s:   | 3.20  | 1.49        | 67    | B1     |        |        |        |        |        |
| 5  | s:   | 5.83  | 1.49        | 66    | An     |        |        |        |        |        |
| 6  | s:   | 8.54  | 1.49        | 67    | A3     |        |        |        |        |        |
| 7  | s:   | 10.04 | 1.49        | 67    | A2     |        |        |        |        |        |
| 8  | s:   | 14.54 | 1.49        | 67    | F1     |        |        |        |        |        |
| 9  | s:   | 26.50 | 1.49        | 67    | R3     |        |        |        |        |        |
| 10 | s:   | 32.96 | 1.49        | 67    | D1F    |        |        |        |        |        |
| 11 | s:   | 34.10 | 1.49        | 67    | D3F    |        |        |        |        |        |
| 12 | s:   | 34.71 | 1.49        | 67    | D3     |        |        |        |        |        |
| 13 | s:   | 35.58 | 1.49        | 67    | R2     |        |        |        |        |        |
| 14 | s:   | 49.95 | 1.49        | 67    | D4     |        |        |        |        |        |
| 15 | s:   | 65.24 | 1.49        | 67    | D2     |        |        |        |        |        |
| 16 | s:   | 95.97 | 1.49        | 67    | D1     |        |        |        |        |        |
| 17 | s:   | 95.97 | 1.49        | 67    | D1     |        |        |        |        |        |

# Sample 11 / cycle 2 / CnB

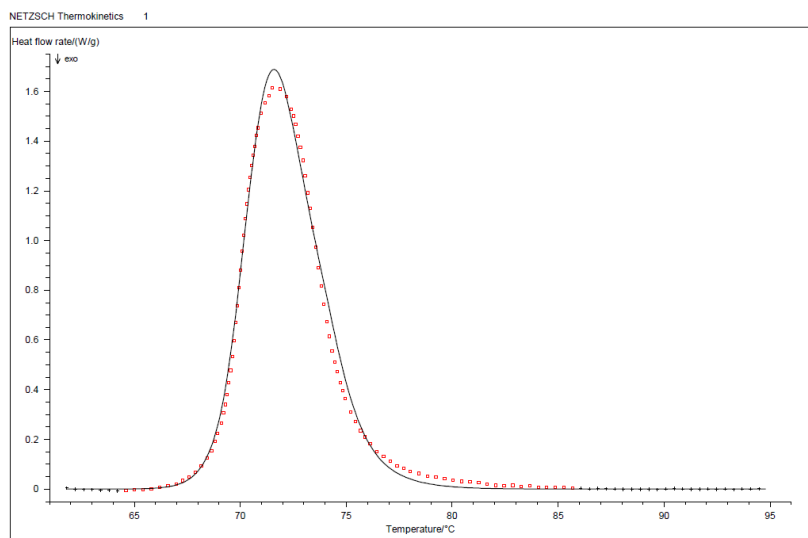

## NETZSCH Thermokinetics

Date/Time: 02.10.2016 at 16:52

Project: 1

Model 1: n-th order with autocatalysis by B

A → B

Start evaluation: 0.00050

Measurement type: DSC

Fine evaluation: 0.99950

SCAN 1

Identity:

OP320 22.04.2016 12:59:05/Segm.S1/2

Transfer Corr: 204\_F1.kcr

Min. Temp/°C: 61.8096

Min. Time/min: 0.0

Max. Temp/°C: 94.7741

Max. Time/min: 3.6858

Heating rate/(K/min): 8.944

Sampling time/s: 0.672

Sample mass/mg: 3.870

Base line type: tangent area prop.

LeftPts: 50 RightPts: 70

## PARAMETERS AND STANDARD DEVIATIONS

| # | Parameter              | Initial Val. | Optimum Val. | Minimum | Maximum | Sign | t*Std.Dev. |
|---|------------------------|--------------|--------------|---------|---------|------|------------|
| 0 | log A1/s <sup>-1</sup> | 55.7595      | 206.8957     |         |         |      | 0.3211     |
| 1 | E1 kJ/mol              | 377.7323     | 1369.7622    |         |         | +    | 2.3391     |
| 2 | React.ord. 1           | 1.4398       | 2.9825       |         |         | +    | 0.1688     |
| 3 | log Kcat 1             | 0.4500       | -0.8532      |         |         |      | 1.5406     |
| 4 | Area 1/(J/g)           | 50.2248      | 50.2248      |         |         |      | constant   |

## STATISTICS

Least squares: 3.97028

Number of cycles: 23

Mean of residues: 0.10969

Max.No of cycles: 50

Correlation coefficient: 0.997668

Rel. precision: 0.001000

Durbin-Watson Value: 0.046

t-critical(0.95;208): 1.963

Durbin-Watson Factor: 4.668

## F-TEST ON FIT-QUALITY

| #  | Code | Fexp  | Fcrit(0.95) | f-act | Type 1 | Type 2 | Type 3 | Type 4 | Type 5 | Type 6 |
|----|------|-------|-------------|-------|--------|--------|--------|--------|--------|--------|
| 0  | s:   | 1.00  | 1.26        | 208   | Cn B   |        |        |        |        |        |
| 1  | s:   | 1.00  | 1.26        | 209   | Fn     |        |        |        |        |        |
| 2  | s:   | 1.01  | 1.26        | 208   | Bna    |        |        |        |        |        |
| 3  | s:   | 1.58  | 1.26        | 209   | C1 B   |        |        |        |        |        |
| 4  | s:   | 1.72  | 1.26        | 210   | B1     |        |        |        |        |        |
| 5  | s:   | 2.38  | 1.26        | 210   | F2     |        |        |        |        |        |
| 6  | s:   | 5.59  | 1.26        | 209   | An     |        |        |        |        |        |
| 7  | s:   | 8.61  | 1.26        | 210   | A2     |        |        |        |        |        |
| 8  | s:   | 11.66 | 1.26        | 210   | F1     |        |        |        |        |        |
| 9  | s:   | 20.32 | 1.26        | 210   | R3     |        |        |        |        |        |
| 10 | s:   | 23.43 | 1.26        | 210   | D1F    |        |        |        |        |        |
| 11 | s:   | 24.90 | 1.26        | 210   | D3F    |        |        |        |        |        |
| 12 | s:   | 25.61 | 1.26        | 210   | D3     |        |        |        |        |        |
| 13 | s:   | 26.93 | 1.26        | 210   | R2     |        |        |        |        |        |
| 14 | s:   | 37.18 | 1.26        | 210   | D4     |        |        |        |        |        |
| 15 | s:   | 46.87 | 1.26        | 210   | D2     |        |        |        |        |        |
| 16 | s:   | 70.87 | 1.26        | 210   | D1     |        |        |        |        |        |
| 17 | s:   | 82.55 | 1.26        | 210   | A3     |        |        |        |        |        |

# Sample 11 / cycle 3 / CnB

NETZSCH Thermokinetics 1

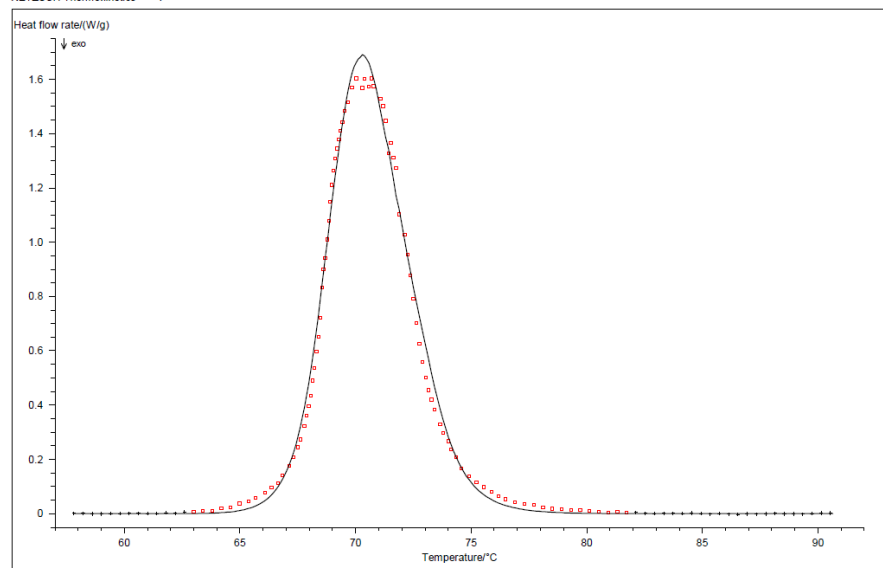

## NETZSCH Thermokinetics

Date/Time: 02.10.2016 at 16:56

Project: 1

Model 1: n-th order with autocatalysis by B

A → 1 → B

Start evaluation: 0.00050

Measurement type: DSC

Fine evaluation: 0.99950

SCAN 1 Identity:

OP320 22.04.2016 13:30:23/Segm.S1/2

Transfer Corr: 204\_F1.kcr

Min. Temp/°C: 57.8146

Min. Time/min: 0.0

Max. Temp/°C: 90.6392

Max. Time/min: 3.6649

Heating rate/(K/min): 8.956

Sampling time/s: 0.670

Sample mass/mg: 3.870

Base line type: tangent area prop.

LeftPts: 40 RightPts: 70

## PARAMETERS AND STANDARD DEVIATIONS

| # | Parameter              | Initial Val. | Optimum Val. | Minimum | Maximum | Sign | t*Std.Dev. |
|---|------------------------|--------------|--------------|---------|---------|------|------------|
| 0 | log A1/s <sup>-1</sup> | 35.4660      | 187.0035     |         |         |      | 279.0263   |
| 1 | E1 kJ/mol              | 243.4855     | 1234.0123    |         |         | +    | 3.9091E-2  |
| 2 | React.ord. 1           | 1.0595       | 2.5373       |         |         | +    | 19.8637    |
| 3 | log Kcat 1             | 0.4500       | -4.0000      |         |         |      | constant   |
| 4 | Area 1/(J/g)           | 50.1469      | 50.1469      |         |         |      | constant   |

## STATISTICS

|                          |          |                       |          |
|--------------------------|----------|-----------------------|----------|
| Least squares:           | 4.38011  | Number of cycles:     | 11       |
| Mean of residues:        | 0.11538  | Max.No of cycles:     | 50       |
| Correlation coefficient: | 0.997323 | Rel. precision:       | 0.001000 |
| Durbin-Watson Value:     | 0.195    | t-critical(0.95;186): | 1.964    |
| Durbin-Watson Factor:    | 2.319    |                       |          |

## F-TEST ON FIT-QUALITY

| #  | Code | Fexp  | Fcrit(0.95) | f-act | Type 1 | Type 2 | Type 3 | Type 4 | Type 5 | Type 6 |
|----|------|-------|-------------|-------|--------|--------|--------|--------|--------|--------|
| 0  | s:   | 1.00  | 1.28        | 186   | Cn B   |        |        |        |        |        |
| 1  | s:   | 1.35  | 1.27        | 188   | B1     |        |        |        |        |        |
| 2  | s:   | 1.37  | 1.27        | 187   | C1 B   |        |        |        |        |        |
| 3  | s:   | 1.45  | 1.27        | 188   | F2     |        |        |        |        |        |
| 4  | s:   | 4.59  | 1.27        | 187   | An     |        |        |        |        |        |
| 5  | s:   | 5.35  | 1.27        | 188   | A3     |        |        |        |        |        |
| 6  | s:   | 6.02  | 1.27        | 188   | A2     |        |        |        |        |        |
| 7  | s:   | 8.18  | 1.27        | 188   | F1     |        |        |        |        |        |
| 8  | s:   | 15.27 | 1.27        | 188   | R3     |        |        |        |        |        |
| 9  | s:   | 18.08 | 1.27        | 188   | D1F    |        |        |        |        |        |
| 10 | s:   | 19.19 | 1.27        | 188   | D3F    |        |        |        |        |        |
| 11 | s:   | 19.69 | 1.27        | 188   | D3     |        |        |        |        |        |
| 12 | s:   | 20.92 | 1.27        | 188   | R2     |        |        |        |        |        |
| 13 | s:   | 29.99 | 1.27        | 188   | D4     |        |        |        |        |        |
| 14 | s:   | 38.82 | 1.27        | 188   | D2     |        |        |        |        |        |
| 15 | s:   | 58.36 | 1.27        | 188   | D1     |        |        |        |        |        |
| 16 | s:   | 58.36 | 1.27        | 188   | D1     |        |        |        |        |        |
| 17 | s:   | 58.36 | 1.27        | 188   | D1     |        |        |        |        |        |

# Sample 11 / cycle 4 / CnB

NETZSCH Thermokinetics 1

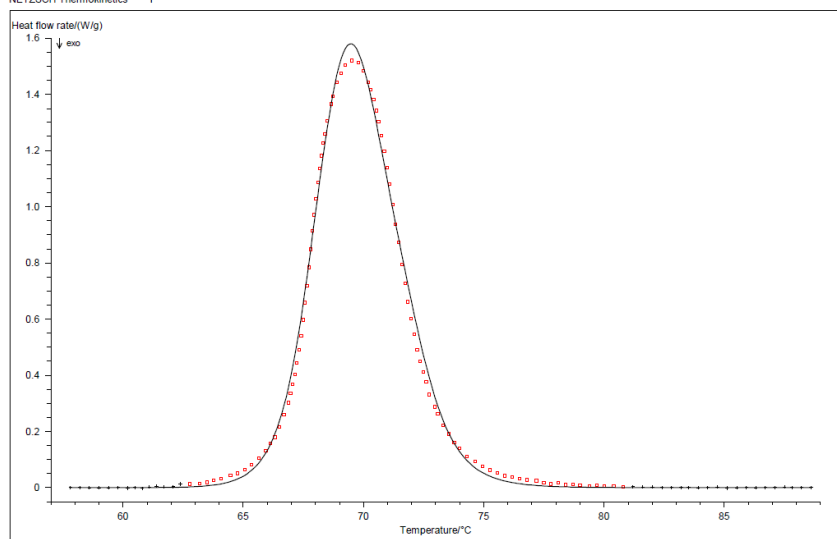

## NETZSCH Thermokinetics

Date/Time: 02.10.2016 at 17:01

Project: 1

Model: 1: n-th order with autocatalysis by B

A → 1 → B

Start evaluation: 0.00050

Measurement type: DSC

Fine evaluation: 0.99950

SCAN 1

Identity:

OP320 22.04.2016 14:15:05/Segm.S1/2

Transfer Corr: 204\_F1.kcr

Min. Temp/°C: 57.8050

Min. Time/min: 0.0

Max. Temp/°C: 88.6123

Max. Time/min: 3.4425

Heating rate/(K/min): 8.949

Sampling time/s: 0.671

Sample mass/mg: 3.870

Base line type: tangent area prop.

LeftPts: 40

RightPts: 50

## PARAMETERS AND STANDARD DEVIATIONS

| # | Parameter              | Initial Val. | Optimum Val. | Minimum | Maximum | Sign | t*Std.Dev. |
|---|------------------------|--------------|--------------|---------|---------|------|------------|
| 0 | log A1/s <sup>-1</sup> | 46.1695      | 175.2195     |         |         |      | 2.3999E-2  |
| 1 | E1 kJ/mol              | 312.8187     | 1154.1392    |         |         | +    | 0.5621     |
| 2 | React.ord. 1           | 1.2099       | 2.4175       |         |         | +    | 9.4369E-2  |
| 3 | log Kcat 1             | 0.4500       | -1.3026      |         |         |      | 3.0527     |
| 4 | Area 1/(J/g)           | 47.5889      | 47.5889      |         |         |      | constant   |

## STATISTICS

Least squares: 2.51844

Number of cycles: 23

Mean of residues: 9.02790E-2

Max.No of cycles: 50

Correlation coefficient: 0.998356

Rel. precision: 0.001000

Durbin-Watson Value: 0.052

t-critical(0.95;183): 1.964

Durbin-Watson Factor: 4.414

## F-TEST ON FIT-QUALITY

| #  | Code | Fexp  | Fcrit(0.95) | f-act | Type 1 | Type 2 | Type 3 | Type 4 | Type 5 | Type 6 |
|----|------|-------|-------------|-------|--------|--------|--------|--------|--------|--------|
| 0  | s:   | 1.00  | 1.28        | 183   | Cn B   |        |        |        |        |        |
| 1  | s:   | 2.31  | 1.28        | 188   | B1     |        |        |        |        |        |
| 2  | s:   | 2.35  | 1.28        | 187   | C1 B   |        |        |        |        |        |
| 3  | s:   | 2.47  | 1.28        | 188   | F2     |        |        |        |        |        |
| 4  | s:   | 7.85  | 1.28        | 187   | An     |        |        |        |        |        |
| 5  | s:   | 9.15  | 1.28        | 188   | A3     |        |        |        |        |        |
| 6  | s:   | 10.29 | 1.28        | 188   | A2     |        |        |        |        |        |
| 7  | s:   | 13.99 | 1.28        | 188   | F1     |        |        |        |        |        |
| 8  | s:   | 26.12 | 1.28        | 188   | R3     |        |        |        |        |        |
| 9  | s:   | 30.93 | 1.28        | 188   | D1F    |        |        |        |        |        |
| 10 | s:   | 32.83 | 1.28        | 188   | D3F    |        |        |        |        |        |
| 11 | s:   | 33.70 | 1.28        | 188   | D3     |        |        |        |        |        |
| 12 | s:   | 35.79 | 1.28        | 188   | R2     |        |        |        |        |        |
| 13 | s:   | 51.32 | 1.28        | 188   | D4     |        |        |        |        |        |
| 14 | s:   | 66.42 | 1.28        | 188   | D2     |        |        |        |        |        |
| 15 | s:   | 99.86 | 1.28        | 188   | D1     |        |        |        |        |        |
| 16 | s:   | 99.86 | 1.28        | 188   | D1     |        |        |        |        |        |
| 17 | s:   | 99.86 | 1.28        | 188   | D1     |        |        |        |        |        |

# Sample 11 / cycle 5 / CnB

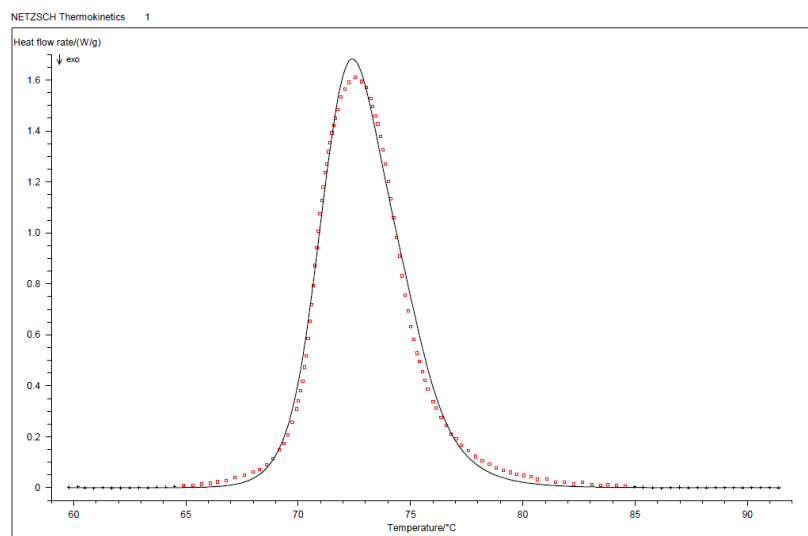

## NETZSCH Thermokinetics

Date/Time: 02.10.2016 at 17:08

Project: 1

Model 1: n-th order with autocatalysis by B

A → 1 → B

Start evaluation: 0.00050

Measurement type:

DSC

Fine evaluation: 0.99950

SCAN 1

Identity:

OP320 26.04.2016 11:13:10/Segm.S1/2

Transfer Corr: 204\_F1.kcr

Min. Temp/°C: 59.7870

Min. Time/min: 0.0

Max. Temp/°C: 91.4874

Max. Time/min: 3.5324

Heating rate/(K/min): 8.974

Sampling time/s: 0.671

Sample mass/mg: 3.870

Base line type: tangent area prop.

LeftPts: 40

RightPts: 50

## PARAMETERS AND STANDARD DEVIATIONS

| # | Parameter              | Initial Val. | Optimum Val. | Minimum | Maximum | Sign | t*Std.Dev. |
|---|------------------------|--------------|--------------|---------|---------|------|------------|
| 0 | log A1/s <sup>-1</sup> | 53.0579      | 185.3183     |         |         |      | 2.4293E-2  |
| 1 | E1 kJ/mol              | 360.9123     | 1230.8709    |         |         | +    | 0.6147     |
| 2 | React.ord. 1           | 1.3857       | 2.8544       |         |         | +    | 0.1158     |
| 3 | log Kcat 1             | 0.4500       | -0.4033      |         |         |      | 0.5190     |
| 4 | Area 1/(J/g)           | 51.6822      | 51.6822      |         |         |      | constant   |

## STATISTICS

Least squares: 4.71235

Number of cycles:

23

Mean of residues: 0.12192

Max.No of cycles:

50

Correlation coefficient: 0.997255

Rel. precision:

0.001000

Durbin-Watson Value: 0.047

t-critical(0.95;195):

1.963

Durbin-Watson Factor: 4.621

## F-TEST ON FIT-QUALITY

| #  | Code | Fexp   | Fcrit(0.95) | f-act | Type 1 | Type 2 | Type 3 | Type 4 | Type 5 | Type 6 |
|----|------|--------|-------------|-------|--------|--------|--------|--------|--------|--------|
| 0  | s:   | 1.00   | 1.27        | 195   | Cn B   |        |        |        |        |        |
| 1  | s:   | 1.02   | 1.27        | 195   | Bna    |        |        |        |        |        |
| 2  | s:   | 1.02   | 1.27        | 196   | Fn     |        |        |        |        |        |
| 3  | s:   | 1.37   | 1.27        | 197   | B1     |        |        |        |        |        |
| 4  | s:   | 1.63   | 1.27        | 196   | C1 B   |        |        |        |        |        |
| 5  | s:   | 2.00   | 1.27        | 197   | F2     |        |        |        |        |        |
| 6  | s:   | 5.95   | 1.27        | 196   | An     |        |        |        |        |        |
| 7  | s:   | 7.46   | 1.27        | 197   | A2     |        |        |        |        |        |
| 8  | s:   | 9.78   | 1.27        | 197   | F1     |        |        |        |        |        |
| 9  | s:   | 17.21  | 1.27        | 197   | R3     |        |        |        |        |        |
| 10 | s:   | 19.49  | 1.27        | 197   | D1F    |        |        |        |        |        |
| 11 | s:   | 20.89  | 1.27        | 197   | D3F    |        |        |        |        |        |
| 12 | s:   | 21.60  | 1.27        | 197   | D3     |        |        |        |        |        |
| 13 | s:   | 22.92  | 1.27        | 197   | R2     |        |        |        |        |        |
| 14 | s:   | 31.67  | 1.27        | 197   | D4     |        |        |        |        |        |
| 15 | s:   | 39.31  | 1.27        | 197   | D2     |        |        |        |        |        |
| 16 | s:   | 55.14  | 1.27        | 185   | D1     |        |        |        |        |        |
| 17 | s:   | 275.20 | 1.27        | 197   | A3     |        |        |        |        |        |

# Sample 11 / cycle 6 / CnB

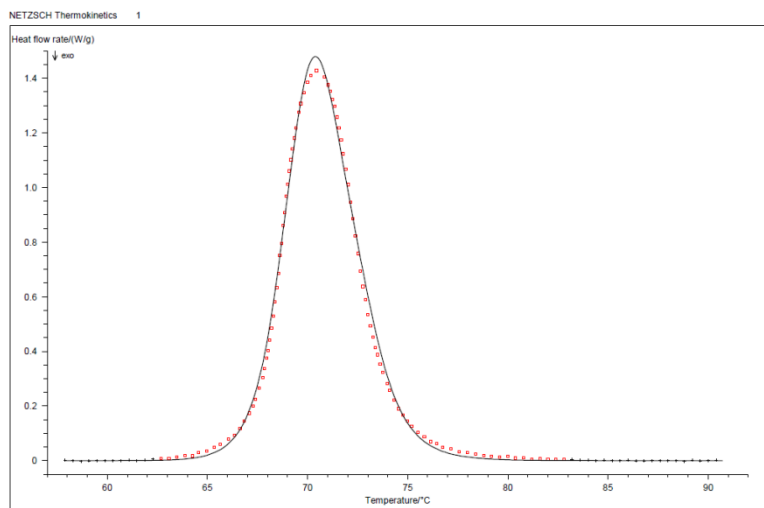

## NETZSCH Thermokinetics

Date/Time: 02.10.2016 at 17:11

Project: 1

Model 1: n-th order with autocatalysis by B

A → B

Start evaluation: 0.00050

Measurement type: DSC

Fine evaluation: 0.99950

SCAN 1 Identity: 204\_F1.kcr OP320 26.04.2016 13:08:26/Segm.S1/2

Transfer Corr: 204\_F1.kcr

Min. Temp/°C: 57.8856

Min. Time/min: 0.0

Max. Temp/°C: 90.7023

Max. Time/min: 3.6638

Heating rate/(K/min): 8.957

Sampling time/s: 0.670

Sample mass/mg: 3.870

Base line type: tangent area prop.

LeftPts: 40

RightPts: 50

## PARAMETERS AND STANDARD DEVIATIONS

| # | Parameter              | Initial Val. | Optimum Val. | Minimum | Maximum | Sign | t*Std.Dev. |
|---|------------------------|--------------|--------------|---------|---------|------|------------|
| 0 | log A1/s <sup>-1</sup> | 57.3191      | 155.3846     |         |         |      | 1.8160     |
| 1 | E1 kJ/mol              | 386.6725     | 1027.5903    |         |         | +    | 12.6136    |
| 2 | React.ord. 1           | 1.4157       | 2.4459       |         |         | +    | 0.1887     |
| 3 | log Kcat 1             | 0.4500       | -0.2153      |         |         |      | 0.9090     |
| 4 | Area 1/(J/g)           | 45.8075      | 45.8075      |         |         |      | constant   |

## STATISTICS

Least squares: 1.95139

Number of cycles: 12

Mean of residues: 7.70148E-2

Max.No of cycles: 50

Correlation coefficient: 0.998509

Rel. precision: 0.001000

Durbin-Watson Value: 0.061

t-critical(0.95;201): 1.963

Durbin-Watson Factor: 4.087

## F-TEST ON FIT-QUALITY

| #  | Code | Fexp   | Fcrit(0.95) | f-act | Type 1 | Type 2 | Type 3 | Type 4 | Type 5 | Type 6 |
|----|------|--------|-------------|-------|--------|--------|--------|--------|--------|--------|
| 0  | s:   | 1.00   | 1.26        | 201   | Cn B   |        |        |        |        |        |
| 1  | s:   | 1.09   | 1.26        | 201   | Bna    |        |        |        |        |        |
| 2  | s:   | 1.10   | 1.26        | 202   | Fn     |        |        |        |        |        |
| 3  | s:   | 1.28   | 1.26        | 203   | B1     |        |        |        |        |        |
| 4  | s:   | 1.43   | 1.26        | 202   | C1 B   |        |        |        |        |        |
| 5  | s:   | 1.68   | 1.26        | 203   | F2     |        |        |        |        |        |
| 6  | s:   | 7.39   | 1.26        | 202   | An     |        |        |        |        |        |
| 7  | s:   | 9.18   | 1.26        | 203   | A3     |        |        |        |        |        |
| 8  | s:   | 10.36  | 1.26        | 203   | A2     |        |        |        |        |        |
| 9  | s:   | 13.66  | 1.26        | 203   | F1     |        |        |        |        |        |
| 10 | s:   | 26.69  | 1.26        | 203   | R3     |        |        |        |        |        |
| 11 | s:   | 29.83  | 1.26        | 203   | D1F    |        |        |        |        |        |
| 12 | s:   | 31.92  | 1.26        | 203   | D3F    |        |        |        |        |        |
| 13 | s:   | 33.10  | 1.26        | 203   | D3     |        |        |        |        |        |
| 14 | s:   | 37.01  | 1.26        | 203   | R2     |        |        |        |        |        |
| 15 | s:   | 51.77  | 1.26        | 203   | D4     |        |        |        |        |        |
| 16 | s:   | 67.24  | 1.26        | 203   | D2     |        |        |        |        |        |
| 17 | s:   | 105.16 | 1.26        | 203   | D1     |        |        |        |        |        |

# Sample 11 / cycle 7 / CnB

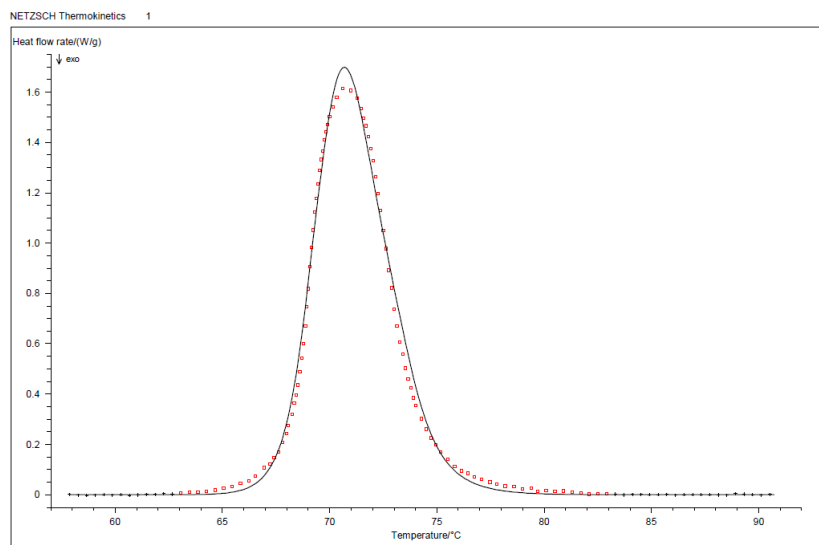

## NETZSCH Thermokinetics

Date/Time: 02.10.2016 at 17:15

Project: 1

Model 1: n-th order with autocatalysis by B

A → B

Start evaluation: 0.00050

Measurement type: DSC

Fine evaluation: 0.99950

SCAN 1

Identity:

OP320 26.04.2016 13:49:33/Segm.S2/3

Transfer Cor: 204\_F1.kcr

Min. Temp°C: 57.8659

Min. Time/min: 0.0

Max. Temp°C: 90.7190

Max. Time/min: 3.6591

Heating rate/(K/min): 8.979

Sampling time/s: 0.669

Sample mass/mg: 3.770

Base line type: tangent area prop.

LeftPts: 40

RightPts: 50

## PARAMETERS AND STANDARD DEVIATIONS

| # | Parameter              | Initial Val. | Optimum Val. | Minimum | Maximum | Sign | t*Std.Dev. |
|---|------------------------|--------------|--------------|---------|---------|------|------------|
| 0 | log A1/s <sup>-1</sup> | 42.5377      | 192.8894     |         |         |      | 1.0182     |
| 1 | E1 kJ/mol              | 290.0923     | 1274.2121    |         |         | +    | 6.9993     |
| 2 | React.ord. 1           | 1.1984       | 2.7396       |         |         | +    | 0.1942     |
| 3 | log Kcat 1             | 0.4500       | -0.9027      |         |         |      | 2.1714     |
| 4 | Area 1/(J/g)           | 50.4484      | 50.4484      |         |         |      | constant   |

## STATISTICS

Least squares: 4.34548

Number of cycles: 44

Mean of residues: 0.11493

Max.No of cycles: 50

Correlation coefficient: 0.997420

Rel. precision: 0.001000

Durbin-Watson Value: 0.055

t-critical(0.95;197): 1.963

Durbin-Watson Factor: 4.291

## F-TEST ON FIT-QUALITY

| #  | Code | Fexp   | Fcrit(0.95) | f-act | Type 1 | Type 2 | Type 3 | Type 4 | Type 5 | Type 6 |
|----|------|--------|-------------|-------|--------|--------|--------|--------|--------|--------|
| 0  | s:   | 1.00   | 1.27        | 197   | Cn B   |        |        |        |        |        |
| 1  | s:   | 1.39   | 1.27        | 199   | B1     |        |        |        |        |        |
| 2  | s:   | 1.42   | 1.27        | 198   | C1 B   |        |        |        |        |        |
| 3  | s:   | 1.77   | 1.27        | 199   | F2     |        |        |        |        |        |
| 4  | s:   | 5.50   | 1.27        | 198   | An     |        |        |        |        |        |
| 5  | s:   | 6.99   | 1.27        | 199   | A2     |        |        |        |        |        |
| 6  | s:   | 9.33   | 1.27        | 199   | F1     |        |        |        |        |        |
| 7  | s:   | 16.89  | 1.27        | 199   | R3     |        |        |        |        |        |
| 8  | s:   | 19.59  | 1.27        | 199   | D1F    |        |        |        |        |        |
| 9  | s:   | 20.90  | 1.27        | 199   | D3F    |        |        |        |        |        |
| 10 | s:   | 21.52  | 1.27        | 199   | D3     |        |        |        |        |        |
| 11 | s:   | 22.77  | 1.27        | 199   | R2     |        |        |        |        |        |
| 12 | s:   | 32.02  | 1.27        | 199   | D4     |        |        |        |        |        |
| 13 | s:   | 40.79  | 1.27        | 199   | D2     |        |        |        |        |        |
| 14 | s:   | 62.90  | 1.27        | 199   | D1     |        |        |        |        |        |
| 15 | s:   | 285.74 | 1.27        | 199   | A3     |        |        |        |        |        |
| 16 | s:   | 285.74 | 1.27        | 199   | A3     |        |        |        |        |        |
| 17 | s:   | 285.74 | 1.27        | 199   | A3     |        |        |        |        |        |

# Sample 11 / cycle 8 / CnB

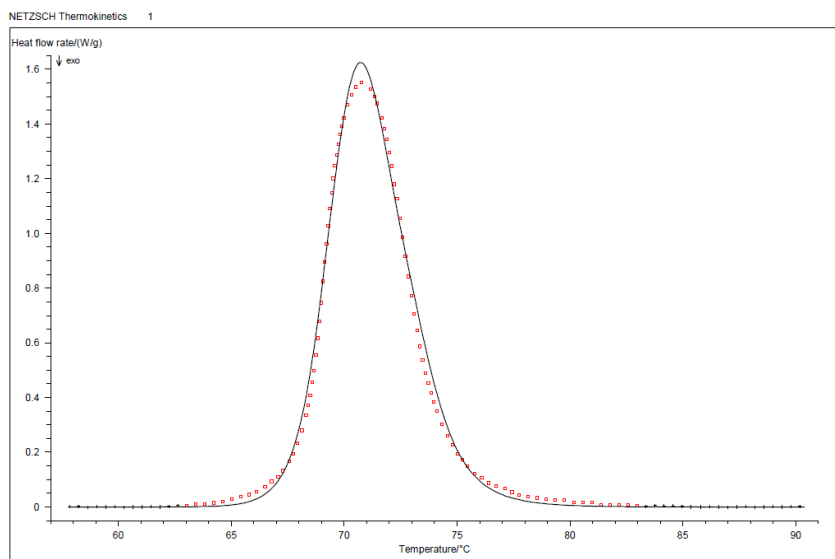

## NETZSCH Thermokinetics

Date/Time: 02.10.2016 at 17:21

Project: 1

Model 1: n-th order with autocatalysis by B

A → 1 → B

Start evaluation: 0.00050

Measurement type: DSC

Fine evaluation: 0.99950

SCAN 1

Identity:

OP320 27.04.2016 15:05:36/Segm.S1/2

Transfer Corr: 204\_F1.kcr

Min. Temp/°C: 57.8311

Min. Time/min: 0.0

Max. Temp/°C: 90.3805

Max. Time/min: 3.6398

Heating rate/(K/min): 8.943

Sampling time/s: 0.672

Sample mass/mg: 3.770

Base line type:

tangent area prop.

LeftPts: 40

RightPts: 50

## PARAMETERS AND STANDARD DEVIATIONS

| # | Parameter              | Initial Val. | Optimum Val. | Minimum | Maximum | Sign | t*Std.Dev. |
|---|------------------------|--------------|--------------|---------|---------|------|------------|
| 0 | log A1/s <sup>-1</sup> | 48.6870      | 181.3198     |         |         |      | 1.1613     |
| 1 | E1 kJ/mol              | 330.4463     | 1198.6221    |         |         | +    | 8.1193     |
| 2 | React.ord. 1           | 1.3152       | 2.7625       |         |         | +    | 0.2070     |
| 3 | log Kcat 1             | 0.4500       | -0.3900      |         |         |      | 1.0141     |
| 4 | Area 1/(J/g)           | 49.2841      | 49.2841      |         |         |      | constant   |

## STATISTICS

Least squares: 3.58504

Number of cycles: 29

Mean of residues: 0.10487

Max.No of cycles: 50

Correlation coefficient: 0.997708

Rel. precision: 0.001000

Durbin-Watson Value: 0.047

t-critical(0.95;200): 1.963

Durbin-Watson Factor: 4.624

## F-TEST ON FIT-QUALITY

| #  | Code | Fexp   | Fcrit(0.95) | f-act | Type 1 | Type 2 | Type 3 | Type 4 | Type 5 | Type 6 |
|----|------|--------|-------------|-------|--------|--------|--------|--------|--------|--------|
| 0  | s:   | 1.00   | 1.26        | 200   | Cn B   |        |        |        |        |        |
| 1  | s:   | 1.03   | 1.26        | 201   | Fn     |        |        |        |        |        |
| 2  | s:   | 1.37   | 1.26        | 202   | B1     |        |        |        |        |        |
| 3  | s:   | 1.67   | 1.26        | 201   | C1 B   |        |        |        |        |        |
| 4  | s:   | 1.97   | 1.26        | 202   | F2     |        |        |        |        |        |
| 5  | s:   | 6.58   | 1.26        | 201   | An     |        |        |        |        |        |
| 6  | s:   | 8.16   | 1.26        | 202   | A2     |        |        |        |        |        |
| 7  | s:   | 10.75  | 1.26        | 202   | F1     |        |        |        |        |        |
| 8  | s:   | 19.44  | 1.26        | 202   | R3     |        |        |        |        |        |
| 9  | s:   | 22.06  | 1.26        | 202   | D1F    |        |        |        |        |        |
| 10 | s:   | 23.67  | 1.26        | 202   | D3F    |        |        |        |        |        |
| 11 | s:   | 24.43  | 1.26        | 202   | D3     |        |        |        |        |        |
| 12 | s:   | 26.20  | 1.26        | 202   | R2     |        |        |        |        |        |
| 13 | s:   | 36.75  | 1.26        | 202   | D4     |        |        |        |        |        |
| 14 | s:   | 46.87  | 1.26        | 202   | D2     |        |        |        |        |        |
| 15 | s:   | 68.84  | 1.26        | 202   | D1     |        |        |        |        |        |
| 16 | s:   | 323.22 | 1.26        | 202   | A3     |        |        |        |        |        |
| 17 | s:   | 323.22 | 1.26        | 202   | A3     |        |        |        |        |        |

# Sample 11 / cycle 9 / CnB

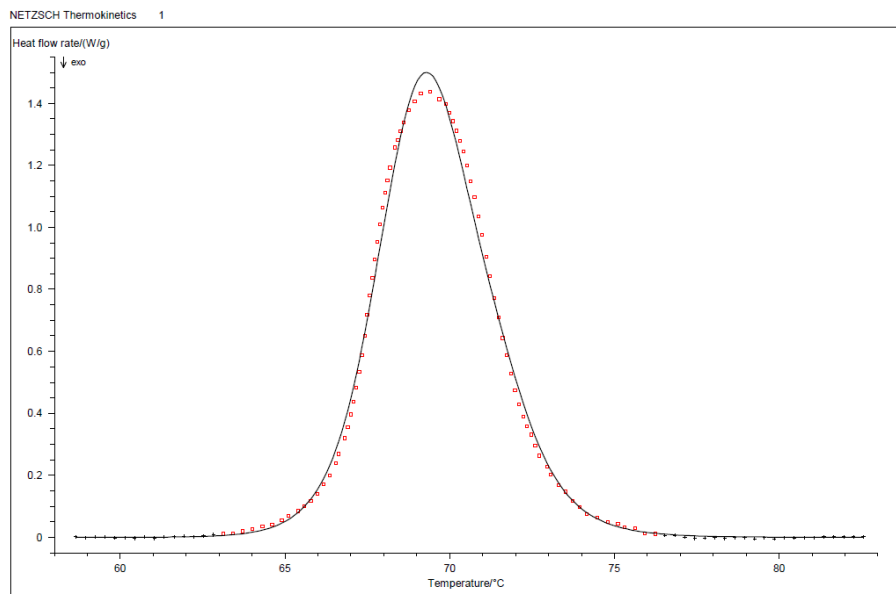

## NETZSCH Thermokinetics

Date/Time: 02.10.2016 at 17:25

Project: 1

Model 1: n-th order with autocatalysis by B

A → 1 → B

Start evaluation: 0.00050

Measurement type: DSC

Fine evaluation: 0.99950

SCAN 1

Identity:

OP320 27.04.2016 15:44:57/Segm.S1/2

Transfer Corr: 204\_F1.kcr

Min. Temp/°C: 58.6448

Min. Time/min: 0.0

Max. Temp/°C: 82.5611

Max. Time/min: 2.6763

Heating rate/(K/min): 8.936

Sampling time/s: 0.672

Sample mass/mg: 3.770

Base line type: tangent area prop.

LeftPts: 40

RightPts: 50

## PARAMETERS AND STANDARD DEVIATIONS

| # | Parameter              | Initial Val. | Optimum Val. | Minimum | Maximum | Sign | t*Std.Dev. |
|---|------------------------|--------------|--------------|---------|---------|------|------------|
| 0 | log A1/s <sup>-1</sup> | 30.4333      | 167.3393     |         |         |      | 1.5886     |
| 1 | E1 kJ/mol              | 209.9103     | 1102.2646    |         |         | +    | 11.3627    |
| 2 | React.ord. 1           | 0.9666       | 2.3670       |         |         | +    | 0.2750     |
| 3 | log Kcat 1             | 0.4500       | -0.4730      |         |         |      | 2.0916     |
| 4 | Area 1/(J/g)           | 43.9080      | 43.9080      |         |         |      | constant   |

## STATISTICS

|                          |          |                       |          |
|--------------------------|----------|-----------------------|----------|
| Least squares:           | 3.11408  | Number of cycles:     | 50       |
| Mean of residues:        | 0.11391  | Max.No of cycles:     | 50       |
| Correlation coefficient: | 0.997836 | Rel. precision:       | 0.001000 |
| Durbin-Watson Value:     | 0.064    | t-critical(0.95;130): | 1.969    |
| Durbin-Watson Factor:    | 3.993    |                       |          |

## F-TEST ON FIT-QUALITY

| #  | Code | Fexp  | Fcrit(0.95) | f-act | Type 1 | Type 2 | Type 3 | Type 4 | Type 5 | Type 6 |
|----|------|-------|-------------|-------|--------|--------|--------|--------|--------|--------|
| 0  | s:   | 1.00  | 1.34        | 130   | Cn B   |        |        |        |        |        |
| 1  | s:   | 3.80  | 1.30        | 183   | An     |        |        |        |        |        |
| 2  | s:   | 5.33  | 1.30        | 184   | A2     |        |        |        |        |        |
| 3  | s:   | 7.12  | 1.30        | 184   | F1     |        |        |        |        |        |
| 4  | s:   | 12.03 | 1.30        | 184   | A3     |        |        |        |        |        |
| 5  | s:   | 13.75 | 1.30        | 184   | R3     |        |        |        |        |        |
| 6  | s:   | 15.83 | 1.30        | 184   | D1F    |        |        |        |        |        |
| 7  | s:   | 16.71 | 1.30        | 184   | D3F    |        |        |        |        |        |
| 8  | s:   | 17.18 | 1.30        | 184   | D3     |        |        |        |        |        |
| 9  | s:   | 19.00 | 1.30        | 184   | R2     |        |        |        |        |        |
| 10 | s:   | 26.30 | 1.30        | 184   | D4     |        |        |        |        |        |
| 11 | s:   | 33.64 | 1.30        | 184   | D2     |        |        |        |        |        |
| 12 | s:   | 52.00 | 1.30        | 184   | D1     |        |        |        |        |        |
| 13 | s:   | 52.00 | 1.30        | 184   | D1     |        |        |        |        |        |
| 14 | s:   | 52.00 | 1.30        | 184   | D1     |        |        |        |        |        |
| 15 | s:   | 52.00 | 1.30        | 184   | D1     |        |        |        |        |        |
| 16 | s:   | 52.00 | 1.30        | 184   | D1     |        |        |        |        |        |
| 17 | s:   | 52.00 | 1.30        | 184   | D1     |        |        |        |        |        |

# Sample 11 / cycle 10 / CnB

NETZSCH Thermokinetics 1

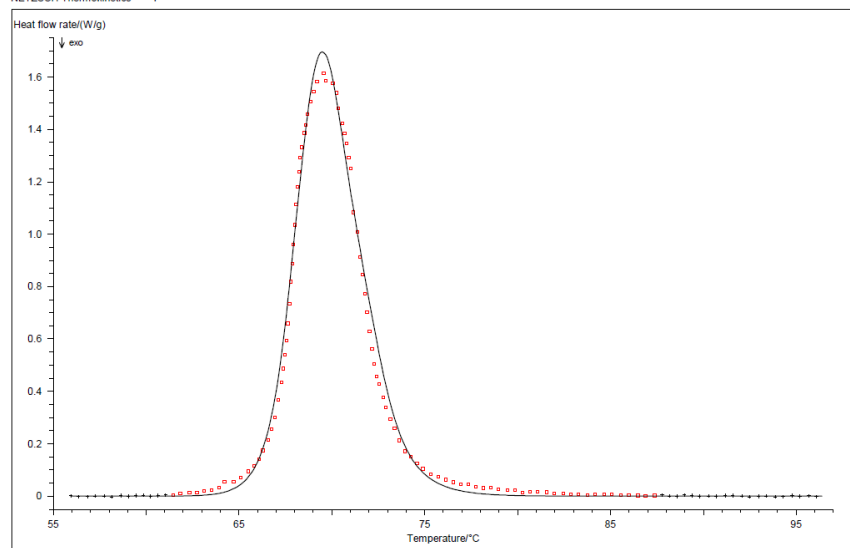

NETZSCH Thermokinetics

Date/Time: 02.10.2016 at 17:29

Project: 1

Model 1: n-th order with autocatalysis by B

A → B

Start evaluation: 0.00050

Measurement type: DSC

Fine evaluation: 0.99950

SCAN 1

Identity:

OP320 27.04.2016 17:04:37/Segm.S2/3

Transfer Corr: 204\_F1.kcr

Min. Temp/°C: 55.9491

Min. Time/min: 0.0

Max. Temp/°C: 96.3809

Max. Time/min: 4.5064

Heating rate/(K/min): 8.972

Sampling time/s: 0.669

Sample mass/mg: 3.770

Base line type: tangent area prop.

LeftPts: 40

RightPts: 50

## PARAMETERS AND STANDARD DEVIATIONS

| # | Parameter              | Initial Val. | Optimum Val. | Minimum | Maximum | Sign | t*Std.Dev. |
|---|------------------------|--------------|--------------|---------|---------|------|------------|
| 0 | log A1/s <sup>-1</sup> | 46.8888      | 172.9063     |         |         |      | 1.7329     |
| 1 | E1 kJ/mol              | 317.4964     | 1139.4052    |         |         | +    | 12.1518    |
| 2 | React.ord. 1           | 1.3138       | 2.7248       |         |         | +    | 0.2607     |
| 3 | log Kcat 1             | 0.4500       | -0.1786      |         |         |      | 1.0367     |
| 4 | Area 1/(J/g)           | 51.5264      | 51.5264      |         |         |      | constant   |

## STATISTICS

Least squares: 5.21589

Number of cycles: 31

Mean of residues: 0.11348

Max.No of cycles: 50

Correlation coefficient: 0.996516

Rel. precision: 0.001000

Durbin-Watson Value: 0.105

t-critical(0.95;261): 1.960

Durbin-Watson Factor: 3.129

## F-TEST ON FIT-QUALITY

| #  | Code | Fexp  | Fcrit(0.95) | f-act | Type 1 | Type 2 | Type 3 | Type 4 | Type 5 | Type 6 |
|----|------|-------|-------------|-------|--------|--------|--------|--------|--------|--------|
| 0  | s:   | 1.00  | 1.34        | 130   | Bna    |        |        |        |        |        |
| 1  | s:   | 1.00  | 1.34        | 131   | Fn     |        |        |        |        |        |
| 2  | s:   | 1.01  | 1.28        | 261   | Cn B   |        |        |        |        |        |
| 3  | s:   | 1.37  | 1.34        | 132   | F2     |        |        |        |        |        |
| 4  | s:   | 2.17  | 1.34        | 132   | B1     |        |        |        |        |        |
| 5  | s:   | 2.19  | 1.34        | 131   | C1 B   |        |        |        |        |        |
| 6  | s:   | 5.94  | 1.34        | 131   | An     |        |        |        |        |        |
| 7  | s:   | 8.12  | 1.34        | 132   | A3     |        |        |        |        |        |
| 8  | s:   | 9.49  | 1.34        | 132   | A2     |        |        |        |        |        |
| 9  | s:   | 13.05 | 1.34        | 132   | F1     |        |        |        |        |        |
| 10 | s:   | 26.36 | 1.34        | 132   | R3     |        |        |        |        |        |
| 11 | s:   | 31.36 | 1.34        | 132   | D1F    |        |        |        |        |        |
| 12 | s:   | 32.55 | 1.34        | 132   | D3F    |        |        |        |        |        |
| 13 | s:   | 33.23 | 1.34        | 132   | D3     |        |        |        |        |        |
| 14 | s:   | 36.93 | 1.34        | 132   | R2     |        |        |        |        |        |
| 15 | s:   | 52.56 | 1.34        | 132   | D4     |        |        |        |        |        |
| 16 | s:   | 62.67 | 1.30        | 184   | D1     |        |        |        |        |        |
| 17 | s:   | 62.67 | 1.30        | 184   | D1     |        |        |        |        |        |

# Sample 11 / cycle 11 / CnB

NETZSCH Thermokinetics 1

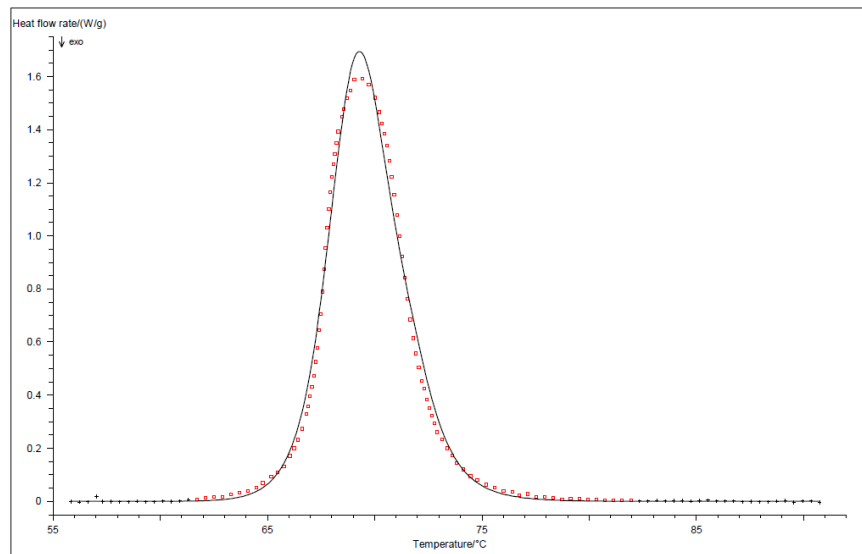

## NETZSCH Thermokinetics

Date/Time: 02.10.2016 at 17:32

Project: 1

Model 1: n-th order with autocatalysis by B

A → B

Start evaluation: 0.00050

Measurement type: DSC

Fine evaluation: 0.99950

SCAN 1

Identity:

OP320 27.04.2016 17:44:40/Segm.S2/3

Transfer Corr: 204\_F1.kcr

Min. Temp/°C: 55.8315

Min. Time/min: 0.0

Max. Temp/°C: 90.7496

Max. Time/min: 3.8941

Heating rate/(K/min): 8.967

Sampling time/s: 0.669

Sample mass/mg: 3.770

Base line type: tangent area prop.

LeftPts: 40 RightPts: 50

## PARAMETERS AND STANDARD DEVIATIONS

| # | Parameter              | Initial Val. | Optimum Val. | Minimum | Maximum | Sign | t*Std.Dev. |
|---|------------------------|--------------|--------------|---------|---------|------|------------|
| 0 | log A1/s <sup>-1</sup> | 34.6351      | 151.1998     |         |         |      | 0.4708     |
| 1 | E1 kJ/mol              | 237.3469     | 997.4848     |         |         | +    | 3.6265     |
| 2 | React.ord. 1           | 1.0605       | 2.4664       |         |         | +    | 0.1049     |
| 3 | log Kcat 1             | 0.4500       | 0.1725       |         |         |      | 0.3362     |
| 4 | Area 1/(J/g)           | 50.0209      | 50.0209      |         |         |      | constant   |

## STATISTICS

|                          |          |                       |          |
|--------------------------|----------|-----------------------|----------|
| Least squares:           | 5.22036  | Number of cycles:     | 50       |
| Mean of residues:        | 0.12213  | Max.No of cycles:     | 50       |
| Correlation coefficient: | 0.996692 | Rel. precision:       | 0.001000 |
| Durbin-Watson Value:     | 0.058    | t-critical(0.95;202): | 1.963    |
| Durbin-Watson Factor:    | 4.167    |                       |          |

## F-TEST ON FIT-QUALITY

| #  | Code | Fexp  | Fcrit(0.95) | f-act | Type 1 | Type 2 | Type 3 | Type 4 | Type 5 | Type 6 |
|----|------|-------|-------------|-------|--------|--------|--------|--------|--------|--------|
| 0  | s:   | 1.00  | 1.23        | 261   | Bna    |        |        |        |        |        |
| 1  | s:   | 1.07  | 1.23        | 262   | Fn     |        |        |        |        |        |
| 2  | s:   | 1.16  | 1.23        | 263   | B1     |        |        |        |        |        |
| 3  | s:   | 1.34  | 1.25        | 202   | Cn B   |        |        |        |        |        |
| 4  | s:   | 1.38  | 1.23        | 262   | C1 B   |        |        |        |        |        |
| 5  | s:   | 1.59  | 1.23        | 263   | F2     |        |        |        |        |        |
| 6  | s:   | 4.27  | 1.23        | 262   | An     |        |        |        |        |        |
| 7  | s:   | 4.62  | 1.23        | 263   | A3     |        |        |        |        |        |
| 8  | s:   | 5.10  | 1.23        | 263   | A2     |        |        |        |        |        |
| 9  | s:   | 6.68  | 1.23        | 263   | F1     |        |        |        |        |        |
| 10 | s:   | 11.78 | 1.23        | 263   | R3     |        |        |        |        |        |
| 11 | s:   | 13.42 | 1.23        | 263   | D1F    |        |        |        |        |        |
| 12 | s:   | 14.44 | 1.23        | 263   | D3F    |        |        |        |        |        |
| 13 | s:   | 14.91 | 1.23        | 263   | D3     |        |        |        |        |        |
| 14 | s:   | 15.79 | 1.23        | 263   | R2     |        |        |        |        |        |
| 15 | s:   | 22.22 | 1.23        | 263   | D4     |        |        |        |        |        |
| 16 | s:   | 28.19 | 1.23        | 263   | D2     |        |        |        |        |        |
| 17 | s:   | 42.00 | 1.23        | 263   | D1     |        |        |        |        |        |

# Sample 11 / cycle 12 / CnB

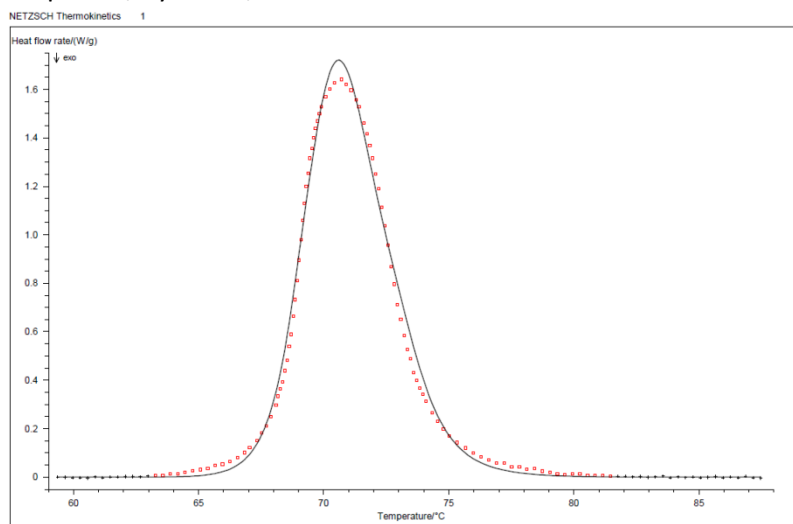

## NETZSCH Thermokinetics

Date/Time: 02.10.2016 at 17:38

Project: 1

Model 1: n-th order with autocatalysis by B

A → B

Start evaluation: 0.00050

Measurement type: DSC

Fine evaluation: 0.99950

SCAN 1

Identity:

OP320 28.04.2016 12:45:11/Segm.S2/3

Transfer Corr: 204\_F1.kcr

Min. Temp/°C: 59.3591

Min. Time/min: 0.0

Max. Temp/°C: 87.4660

Max. Time/min: 3.1264

Heating rate/(K/min): 8.990

Sampling time/s: 0.670

Sample mass/mg: 3.770

Base line type: tangent area prop.

LeftPts: 30

RightPts: 40

## PARAMETERS AND STANDARD DEVIATIONS

| # | Parameter              | Initial Val. | Optimum Val. | Minimum | Maximum | Sign | t*Std.Dev. |
|---|------------------------|--------------|--------------|---------|---------|------|------------|
| 0 | log A1/s <sup>-1</sup> | 39.8349      | 192.9430     |         |         |      | 1.3465     |
| 1 | E1 kJ/mol              | 272.2654     | 1274.2760    |         |         | +    | 9.2567     |
| 2 | React.ord. 1           | 1.1552       | 2.7576       |         |         | +    | 0.2210     |
| 3 | log Kcat 1             | 0.4500       | -0.6066      |         |         |      | 1.4470     |
| 4 | Area 1/(J/g)           | 50.4243      | 50.4243      |         |         |      | constant   |

## STATISTICS

Least squares: 5.54808

Number of cycles: 30

Mean of residues: 0.14051

Max.No of cycles: 50

Correlation coefficient: 0.997094

Rel. precision: 0.001000

Durbin-Watson Value: 0.055

t-critical(0.95;179): 1.964

Durbin-Watson Factor: 4.313

## F-TEST ON FIT-QUALITY

| #  | Code | Fexp  | Fcrit(0.95) | f-act | Type 1 | Type 2 | Type 3 | Type 4 | Type 5 | Type 6 |
|----|------|-------|-------------|-------|--------|--------|--------|--------|--------|--------|
| 0  | s:   | 1.00  | 1.26        | 202   | Bna    |        |        |        |        |        |
| 1  | s:   | 1.06  | 1.26        | 203   | Fn     |        |        |        |        |        |
| 2  | s:   | 1.31  | 1.26        | 204   | B1     |        |        |        |        |        |
| 3  | s:   | 1.33  | 1.26        | 203   | C1 B   |        |        |        |        |        |
| 4  | s:   | 1.46  | 1.26        | 204   | F2     |        |        |        |        |        |
| 5  | s:   | 1.48  | 1.27        | 179   | Cn B   |        |        |        |        |        |
| 6  | s:   | 4.68  | 1.26        | 203   | An     |        |        |        |        |        |
| 7  | s:   | 5.78  | 1.26        | 204   | A2     |        |        |        |        |        |
| 8  | s:   | 7.80  | 1.26        | 204   | F1     |        |        |        |        |        |
| 9  | s:   | 14.61 | 1.26        | 204   | R3     |        |        |        |        |        |
| 10 | s:   | 17.19 | 1.26        | 204   | D1F    |        |        |        |        |        |
| 11 | s:   | 18.26 | 1.26        | 204   | D3F    |        |        |        |        |        |
| 12 | s:   | 18.78 | 1.26        | 204   | D3     |        |        |        |        |        |
| 13 | s:   | 20.05 | 1.26        | 204   | R2     |        |        |        |        |        |
| 14 | s:   | 28.51 | 1.26        | 204   | D4     |        |        |        |        |        |
| 15 | s:   | 31.31 | 1.26        | 204   | A3     |        |        |        |        |        |
| 16 | s:   | 37.27 | 1.26        | 204   | D2     |        |        |        |        |        |
| 17 | s:   | 57.65 | 1.26        | 204   | D1     |        |        |        |        |        |

# Sample 11 / cycle 13 / CnB

NETZSCH Thermokinetics 1

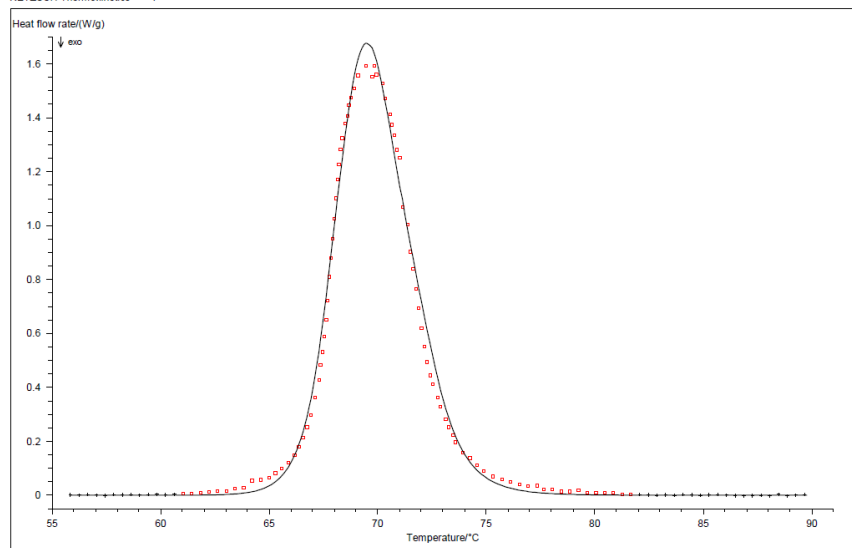

## NETZSCH Thermokinetics

Date/Time: 02.10.2016 at 17:44

Project: 1

Model 1: n-th order with autocatalysis by B

A → 1 → B

Start evaluation: 0.00050

Measurement type: DSC

Fine evaluation: 0.99950

SCAN 1

Identity:

OP320 27.04.2016 17:04:37/Segm.S2/3

Transfer Corr: 204\_F1.kcr

Min. Temp/°C: 55.8393

Min. Time/min: 0.0

Max. Temp/°C: 89.7693

Max. Time/min: 3.7815

Heating rate/(K/min): 8.973

Sampling time/s: 0.669

Sample mass/mg: 3.770

Base line type: tangent area prop.

LeftPts: 40 RightPts: 50

## PARAMETERS AND STANDARD DEVIATIONS

| # | Parameter              | Initial Val. | Optimum Val. | Minimum | Maximum | Sign | t*Std.Dev. |
|---|------------------------|--------------|--------------|---------|---------|------|------------|
| 0 | log A1/s <sup>-1</sup> | 30.6365      | 183.1905     |         |         |      | 0.8524     |
| 1 | E1 kJ/mol              | 211.3916     | 1206.3381    |         |         | +    | 6.0023     |
| 2 | React.ord. 1           | 1.0131       | 2.5993       |         |         | +    | 0.2163     |
| 3 | log Kcat 1             | 0.4500       | -0.9058      |         |         |      | 2.7266     |
| 4 | Area 1/(J/g)           | 50.1685      | 50.1685      |         |         |      | constant   |

## STATISTICS

Least squares: 5.09135

Number of cycles: 35

Mean of residues: 0.12237

Max.No of cycles: 50

Correlation coefficient: 0.996852

Rel. precision: 0.001000

Durbin-Watson Value: 0.139

t-critical(0.95;205): 1.963

Durbin-Watson Factor: 2.732

## F-TEST ON FIT-QUALITY

| #  | Code | Fexp  | Fcrit(0.95) | f-act | Type 1 | Type 2 | Type 3 | Type 4 | Type 5 | Type 6 |
|----|------|-------|-------------|-------|--------|--------|--------|--------|--------|--------|
| 0  | s:   | 1.00  | 1.26        | 205   | Cn B   |        |        |        |        |        |
| 1  | s:   | 1.18  | 1.27        | 179   | Bna    |        |        |        |        |        |
| 2  | s:   | 1.25  | 1.27        | 180   | Fn     |        |        |        |        |        |
| 3  | s:   | 1.49  | 1.27        | 181   | B1     |        |        |        |        |        |
| 4  | s:   | 1.58  | 1.27        | 180   | C1 B   |        |        |        |        |        |
| 5  | s:   | 2.16  | 1.27        | 181   | F2     |        |        |        |        |        |
| 6  | s:   | 5.59  | 1.27        | 180   | An     |        |        |        |        |        |
| 7  | s:   | 7.89  | 1.27        | 181   | A2     |        |        |        |        |        |
| 8  | s:   | 10.76 | 1.27        | 181   | F1     |        |        |        |        |        |
| 9  | s:   | 19.37 | 1.27        | 181   | R3     |        |        |        |        |        |
| 10 | s:   | 22.52 | 1.27        | 181   | D1F    |        |        |        |        |        |
| 11 | s:   | 24.15 | 1.27        | 181   | D3F    |        |        |        |        |        |
| 12 | s:   | 24.87 | 1.27        | 181   | D3     |        |        |        |        |        |
| 13 | s:   | 26.12 | 1.27        | 181   | R2     |        |        |        |        |        |
| 14 | s:   | 36.94 | 1.27        | 181   | D4     |        |        |        |        |        |
| 15 | s:   | 46.99 | 1.27        | 181   | D2     |        |        |        |        |        |
| 16 | s:   | 58.06 | 1.27        | 181   | A3     |        |        |        |        |        |
| 17 | s:   | 69.70 | 1.27        | 181   | D1     |        |        |        |        |        |

# Sample 11 / cycle 14 / CnB

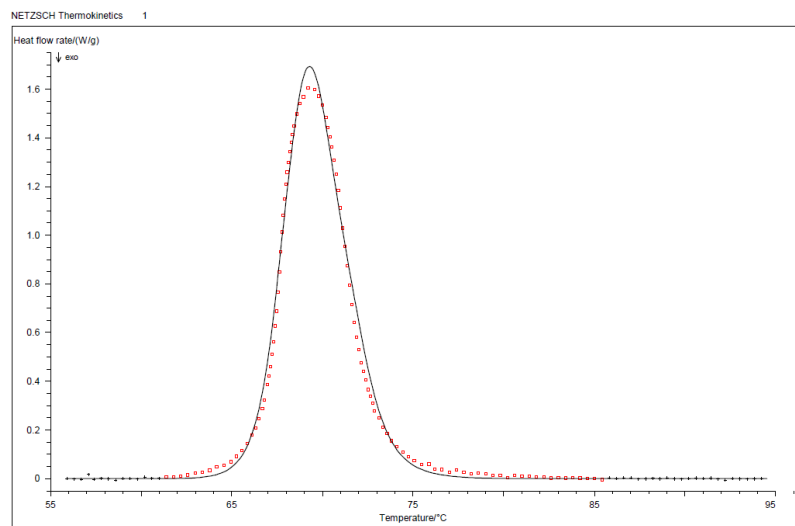

## NETZSCH Thermokinetics

Date/Time: 02.10.2016 at 17:48

Project: 1

Model 1: n-th order with autocatalysis by B

A → 1 → B

Start evaluation: 0.00050

Measurement type: DSC

Fine evaluation: 0.99950

SCAN 1

Identity:

OP320 27.04.2016 17:44:40/Segm.S2/3

Transfer Corr: 204\_F1.kcr

Min. Temp/°C:

Min. Time/min: 0.0

Max. Temp/°C: 94.5206

Max. Time/min: 4.3069

Heating rate/(K/min):

Sampling time/s: 0.669

Sample mass/mg: 3.770

Base line type: tangent area prop.

LeftPts: 40

RightPts: 50

## PARAMETERS AND STANDARD DEVIATIONS

| # | Parameter              | Initial Val. | Optimum Val. | Minimum | Maximum | Sign | t*Std.Dev. |
|---|------------------------|--------------|--------------|---------|---------|------|------------|
| 0 | log A1/s <sup>-1</sup> | 39.1792      | 178.8506     |         |         |      | 1.4534     |
| 1 | E1 kJ/mol              | 266.9950     | 1177.3514    |         |         | +    | 9.9749     |
| 2 | React.ord. 1           | 1.1534       | 2.5906       |         |         | +    | 0.2131     |
| 3 | log Kcat 1             | 0.4500       | -0.5882      |         |         |      | 1.4840     |
| 4 | Area 1/(J/g)           | 50.6936      | 50.6936      |         |         |      | constant   |

## STATISTICS

Least squares: 4.50257

Number of cycles: 34

Mean of residues: 0.10786

Max.No of cycles: 50

Correlation coefficient: 0.997052

Rel. precision: 0.001000

Durbin-Watson Value: 0.054

t-critical(0.95;237): 1.961

Durbin-Watson Factor: 4.347

## F-TEST ON FIT-QUALITY

| #  | Code | Fexp   | Fcrit(0.95) | f-act | Type 1 | Type 2 | Type 3 | Type 4 | Type 5 | Type 6 |
|----|------|--------|-------------|-------|--------|--------|--------|--------|--------|--------|
| 0  | s:   | 1.00   | 1.24        | 237   | Cn B   |        |        |        |        |        |
| 1  | s:   | 1.24   | 1.25        | 205   | Bna    |        |        |        |        |        |
| 2  | s:   | 1.30   | 1.25        | 206   | Fn     |        |        |        |        |        |
| 3  | s:   | 1.57   | 1.25        | 207   | B1     |        |        |        |        |        |
| 4  | s:   | 1.75   | 1.25        | 206   | C1 B   |        |        |        |        |        |
| 5  | s:   | 1.86   | 1.25        | 207   | F2     |        |        |        |        |        |
| 6  | s:   | 5.72   | 1.25        | 206   | An     |        |        |        |        |        |
| 7  | s:   | 6.88   | 1.25        | 207   | A2     |        |        |        |        |        |
| 8  | s:   | 9.17   | 1.25        | 207   | F1     |        |        |        |        |        |
| 9  | s:   | 16.78  | 1.25        | 207   | R3     |        |        |        |        |        |
| 10 | s:   | 19.63  | 1.25        | 207   | D1F    |        |        |        |        |        |
| 11 | s:   | 20.87  | 1.25        | 207   | D3F    |        |        |        |        |        |
| 12 | s:   | 21.47  | 1.25        | 207   | D3     |        |        |        |        |        |
| 13 | s:   | 22.88  | 1.25        | 207   | R2     |        |        |        |        |        |
| 14 | s:   | 32.38  | 1.25        | 207   | D4     |        |        |        |        |        |
| 15 | s:   | 41.41  | 1.25        | 207   | D2     |        |        |        |        |        |
| 16 | s:   | 62.66  | 1.25        | 207   | D1     |        |        |        |        |        |
| 17 | s:   | 302.01 | 1.25        | 207   | A3     |        |        |        |        |        |

## Sample 11 / cycle 15 / CnB

NETZSCH Thermokinetics 1

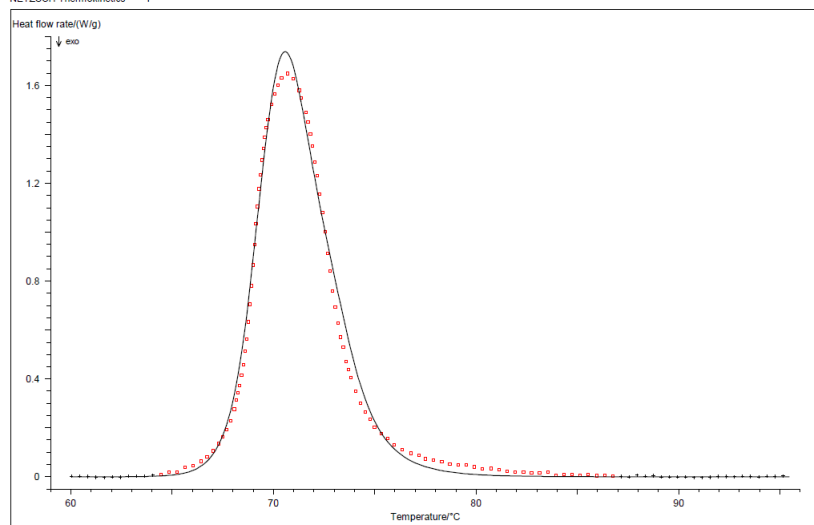

## NETZSCH Thermokinetics

Date/Time: 02.10.2016 at 17:53

Project: 1

Model 1: n-th order with autocatalysis by B

A → 1 → B

Start evaluation: 0.00050

Measurement type: DSC

Fine evaluation: 0.99950

SCAN 1

Identity:

OP320 28.04.2016 12:45:11/Segm.S2/3

Transfer Corr: 204 F1.kcr

Min. Temp/°C: 60.0415

Min. Time/min: 0.0

Max. Temp/°C: 95.4517

Max. Time/min: 3.9418

Heating rate/(K/min): 8.983

Sampling time/s: 0.670

Sample mass/mg: 3.770

Base line type: tangent area prop.

LeftPts: 40

RightPts: 70

## PARAMETERS AND STANDARD DEVIATIONS

| # | Parameter              | Initial Val. | Optimum Val. | Minimum | Maximum | Sign | t*Std.Dev. |
|---|------------------------|--------------|--------------|---------|---------|------|------------|
| 0 | log A1/s <sup>-1</sup> | 59.4713      | 187.3538     |         |         |      | 0.7175     |
| 1 | E1 kJ/mol              | 400.8909     | 1237.9731    |         |         | +    | 5.3929     |
| 2 | React.ord. 1           | 1.5630       | 3.0769       |         |         | +    | 0.2411     |
| 3 | log Kcat 1             | 0.4500       | -1.3129E-2   |         |         |      | 0.6783     |
| 4 | Area 1/(J/g)           | 52.0740      | 52.0740      |         |         |      | constant   |

## STATISTICS

|                          |          |                       |          |
|--------------------------|----------|-----------------------|----------|
| Least squares:           | 5.98057  | Number of cycles:     | 4        |
| Mean of residues:        | 0.12998  | Max.No of cycles:     | 50       |
| Correlation coefficient: | 0.996389 | Rel. precision:       | 0.001000 |
| Durbin-Watson Value:     | 0.044    | t-critical(0.95;219): | 1.962    |
| Durbin-Watson Factor:    | 4.767    |                       |          |

## F-TEST ON FIT-QUALITY

| #  | Code | Fexp  | Fcrit(0.95) | f-act | Type 1 | Type 2 | Type 3 | Type 4 | Type 5 | Type 6 |
|----|------|-------|-------------|-------|--------|--------|--------|--------|--------|--------|
| 0  | s:   | 1.00  | 1.25        | 219   | Cn B   |        |        |        |        |        |
| 1  | s:   | 1.05  | 1.25        | 219   | Bna    |        |        |        |        |        |
| 2  | s:   | 1.07  | 1.25        | 220   | Fn     |        |        |        |        |        |
| 3  | s:   | 1.16  | 1.25        | 221   | B1     |        |        |        |        |        |
| 4  | s:   | 2.11  | 1.25        | 221   | F2     |        |        |        |        |        |
| 5  | s:   | 2.73  | 1.25        | 220   | C1 B   |        |        |        |        |        |
| 6  | s:   | 4.27  | 1.25        | 220   | An     |        |        |        |        |        |
| 7  | s:   | 6.08  | 1.25        | 221   | A2     |        |        |        |        |        |
| 8  | s:   | 8.00  | 1.25        | 221   | F1     |        |        |        |        |        |
| 9  | s:   | 13.36 | 1.25        | 221   | R3     |        |        |        |        |        |
| 10 | s:   | 14.84 | 1.25        | 221   | D1F    |        |        |        |        |        |
| 11 | s:   | 16.19 | 1.25        | 221   | D3F    |        |        |        |        |        |
| 12 | s:   | 16.76 | 1.25        | 221   | D3     |        |        |        |        |        |
| 13 | s:   | 17.45 | 1.25        | 221   | R2     |        |        |        |        |        |
| 14 | s:   | 24.04 | 1.25        | 221   | D4     |        |        |        |        |        |
| 15 | s:   | 29.58 | 1.25        | 221   | D2     |        |        |        |        |        |
| 16 | s:   | 38.73 | 1.25        | 221   | A3     |        |        |        |        |        |
| 17 | s:   | 42.98 | 1.25        | 221   | D1     |        |        |        |        |        |

# Sample 11 / cycle 16 / CnB

NETZSCH Thermokinetics 1

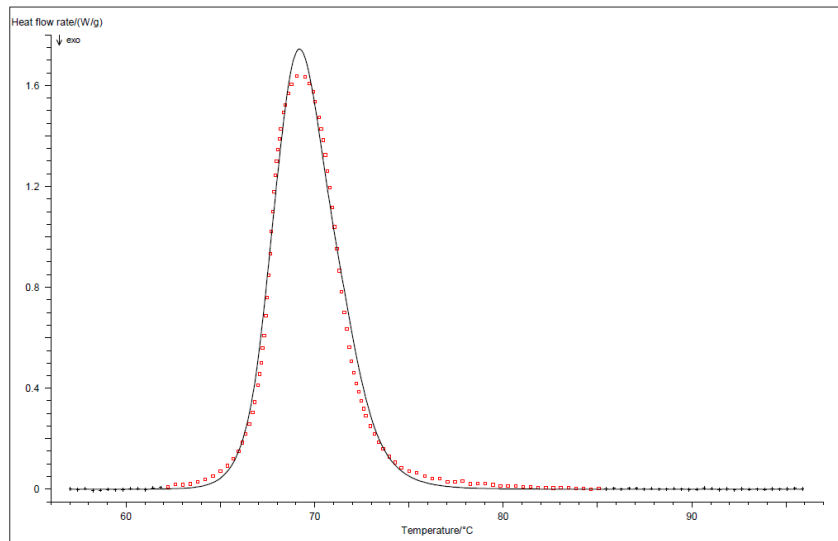

## NETZSCH Thermokinetics

Date/Time: 02.10.2016 at 17:57

Project: 1

Model 1: n-th order with autocatalysis by B

A → 1 → B

Start evaluation: 0.00050

Measurement type: DSC

Fine evaluation: 0.99950

SCAN 1

Identity:

OP320 28.04.2016 13:26:28/Segm.S2/3

Transfer Corr: 204\_F1.kcr

Min. Temp/°C: 57.0347

Min. Time/min: 0.0

Max. Temp/°C: 95.8662

Max. Time/min: 4.3287

Heating rate/(K/min): 8.971

Sampling time/s: 0.669

Sample mass/mg: 3.770

Base line type: tangent area prop.

LeftPts: 40

RightPts: 70

## PARAMETERS AND STANDARD DEVIATIONS

| # | Parameter              | Initial Val. | Optimum Val. | Minimum | Maximum | Sign | t*Std.Dev. |
|---|------------------------|--------------|--------------|---------|---------|------|------------|
| 0 | log A1/s <sup>-1</sup> | 36.3941      | 189.4939     |         |         |      | 0.7881     |
| 1 | E1 kJ/mol              | 248.6875     | 1246.5521    |         |         | +    | 5.6927     |
| 2 | React.ord. 1           | 1.1184       | 2.7016       |         |         | +    | 0.2286     |
| 3 | log Kcat 1             | 0.4500       | -0.5424      |         |         |      | 1.5076     |
| 4 | Area 1/(J/g)           | 51.0304      | 51.0304      |         |         |      | constant   |

## STATISTICS

|                          |          |                       |          |
|--------------------------|----------|-----------------------|----------|
| Least squares:           | 5.06572  | Number of cycles:     | 50       |
| Mean of residues:        | 0.11412  | Max.No of cycles:     | 50       |
| Correlation coefficient: | 0.996776 | Rel. precision:       | 0.001000 |
| Durbin-Watson Value:     | 0.055    | t-critical(0.95;228): | 1.961    |
| Durbin-Watson Factor:    | 4.306    |                       |          |

## F-TEST ON FIT-QUALITY

| #  | Code | Fexp   | Fcrit(0.95) | f-act | Type 1 | Type 2 | Type 3 | Type 4 | Type 5 | Type 6 |
|----|------|--------|-------------|-------|--------|--------|--------|--------|--------|--------|
| 0  | s:   | 1.00   | 1.25        | 228   | Bna    |        |        |        |        |        |
| 1  | s:   | 1.06   | 1.24        | 229   | Fn     |        |        |        |        |        |
| 2  | s:   | 1.07   | 1.25        | 228   | Cn B   |        |        |        |        |        |
| 3  | s:   | 1.28   | 1.24        | 230   | B1     |        |        |        |        |        |
| 4  | s:   | 1.30   | 1.24        | 229   | C1 B   |        |        |        |        |        |
| 5  | s:   | 1.59   | 1.24        | 230   | F2     |        |        |        |        |        |
| 6  | s:   | 4.24   | 1.24        | 229   | An     |        |        |        |        |        |
| 7  | s:   | 5.36   | 1.24        | 230   | A2     |        |        |        |        |        |
| 8  | s:   | 7.29   | 1.24        | 230   | F1     |        |        |        |        |        |
| 9  | s:   | 13.13  | 1.24        | 230   | R3     |        |        |        |        |        |
| 10 | s:   | 15.48  | 1.24        | 230   | D1F    |        |        |        |        |        |
| 11 | s:   | 16.53  | 1.24        | 230   | D3F    |        |        |        |        |        |
| 12 | s:   | 16.99  | 1.24        | 230   | D3     |        |        |        |        |        |
| 13 | s:   | 17.78  | 1.24        | 230   | R2     |        |        |        |        |        |
| 14 | s:   | 25.20  | 1.24        | 230   | D4     |        |        |        |        |        |
| 15 | s:   | 31.45  | 1.24        | 230   | D2     |        |        |        |        |        |
| 16 | s:   | 47.95  | 1.24        | 230   | D1     |        |        |        |        |        |
| 17 | s:   | 229.14 | 1.24        | 230   | A3     |        |        |        |        |        |

# Sample 11 / cycle 17 / CnB

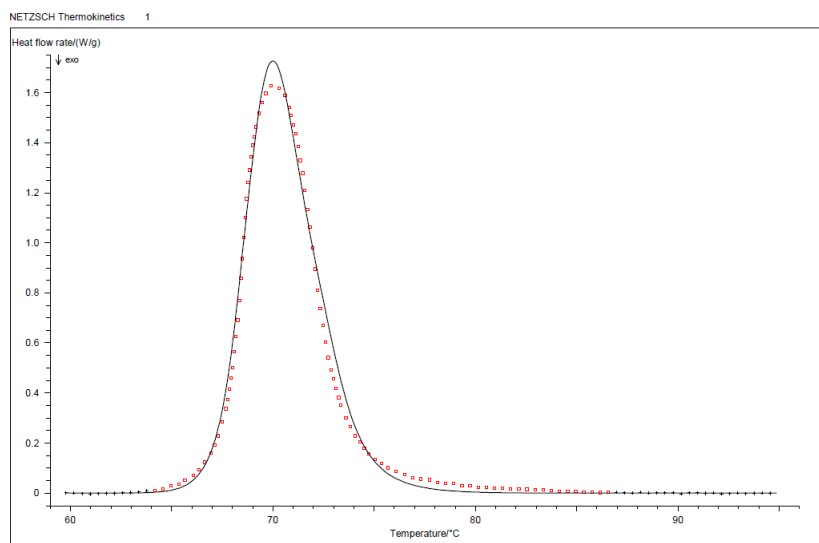

## NETZSCH Thermokinetics

Date/Time: 02.10.2016 at 17:59

Project: 1

Model 1: n-th order with autocatalysis by B

A → 1 → B

Start evaluation: 0.00050

Measurement type: DSC

Fine evaluation: 0.99950

SCAN 1

Identity:

OP320 28.04.2016 16:37:10/Segm.S1/2

Transfer Corr: 204\_F1.kcr

Min. Temp/°C: 59.7814

Min. Time/min: 0.0

Max. Temp/°C: 94.8563

Max. Time/min: 3.9119

Heating rate/(K/min): 8.966

Sampling time/s: 0.671

Sample mass/mg: 3.770

Base line type:

tangent area prop.

LeftPts: 40

RightPts: 50

## PARAMETERS AND STANDARD DEVIATIONS

| # | Parameter              | Initial Val. | Optimum Val. | Minimum | Maximum | Sign | t*Std.Dev. |
|---|------------------------|--------------|--------------|---------|---------|------|------------|
| 0 | log A1/s <sup>-1</sup> | 53.9354      | 195.0287     |         |         |      | 1.2010     |
| 1 | E1 kJ/mol              | 363.9683     | 1285.8932    |         |         | +    | 8.4660     |
| 2 | React.ord. 1           | 1.4522       | 3.0102       |         |         | +    | 0.2460     |
| 3 | log Kcat 1             | 0.4500       | -0.2241      |         |         |      | 0.8915     |
| 4 | Area 1/(J/g)           | 50.9006      | 50.9006      |         |         |      | constant   |

## STATISTICS

Least squares: 5.68664

Number of cycles: 29

Mean of residues: 0.12728

Max.No of cycles: 50

Correlation coefficient: 0.996587

Rel. precision: 0.001000

Durbin-Watson Value: 0.045

t-critical(0.95;223): 1.962

Durbin-Watson Factor: 4.747

## F-TEST ON FIT-QUALITY

| #  | Code | Fexp   | Fcrit(0.95) | f-act | Type 1 | Type 2 | Type 3 | Type 4 | Type 5 | Type 6 |
|----|------|--------|-------------|-------|--------|--------|--------|--------|--------|--------|
| 0  | s:   | 1.00   | 1.25        | 228   | Bna    |        |        |        |        |        |
| 1  | s:   | 1.06   | 1.24        | 229   | Fn     |        |        |        |        |        |
| 2  | s:   | 1.23   | 1.25        | 223   | Cn B   |        |        |        |        |        |
| 3  | s:   | 1.28   | 1.24        | 230   | B1     |        |        |        |        |        |
| 4  | s:   | 1.30   | 1.24        | 229   | C1 B   |        |        |        |        |        |
| 5  | s:   | 1.59   | 1.24        | 230   | F2     |        |        |        |        |        |
| 6  | s:   | 4.24   | 1.24        | 229   | An     |        |        |        |        |        |
| 7  | s:   | 5.36   | 1.24        | 230   | A2     |        |        |        |        |        |
| 8  | s:   | 7.29   | 1.24        | 230   | F1     |        |        |        |        |        |
| 9  | s:   | 13.13  | 1.24        | 230   | R3     |        |        |        |        |        |
| 10 | s:   | 15.48  | 1.24        | 230   | D1F    |        |        |        |        |        |
| 11 | s:   | 16.53  | 1.24        | 230   | D3F    |        |        |        |        |        |
| 12 | s:   | 16.99  | 1.24        | 230   | D3     |        |        |        |        |        |
| 13 | s:   | 17.78  | 1.24        | 230   | R2     |        |        |        |        |        |
| 14 | s:   | 25.20  | 1.24        | 230   | D4     |        |        |        |        |        |
| 15 | s:   | 31.45  | 1.24        | 230   | D2     |        |        |        |        |        |
| 16 | s:   | 47.95  | 1.24        | 230   | D1     |        |        |        |        |        |
| 17 | s:   | 229.14 | 1.24        | 230   | A3     |        |        |        |        |        |

# Sample 12 / cycle 1 / CnB

NETZSCH Thermokinetics 1

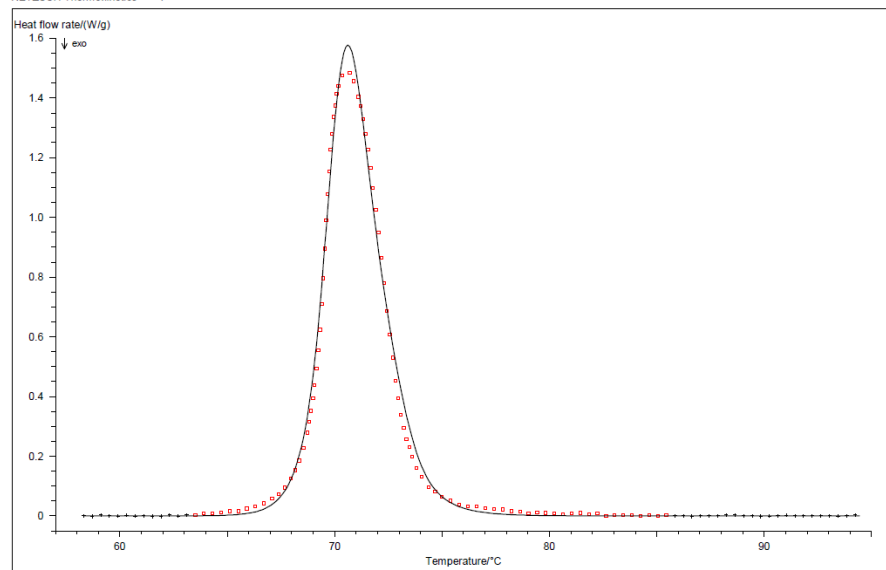

NETZSCH Thermokinetics

Date/Time: 02.10.2016 at 18:17

Project: 1

Model 1: n-th order with autocatalysis by B

A → B

Start evaluation: 0.00050

Measurement type: DSC

Fine evaluation: 0.99950

SCAN 1

Identity:

OP320 08.05.2016 16:43:02/Segm.S2/3

Transfer Corr: 204\_F1.kcr

Min. Temp/°C: 58.3092

Min. Time/min: 0.0

Max. Temp/°C: 94.4401

Max. Time/min: 6.0408

Heating rate/(K/min): 5.981

Sampling time/s: 1.004

Sample mass/mg: 3.580

Base line type: tangent area prop.

LeftPts: 40

RightPts: 50

## PARAMETERS AND STANDARD DEVIATIONS

| # | Parameter              | Initial Val. | Optimum Val. | Minimum | Maximum | Sign | t*Std.Dev. |
|---|------------------------|--------------|--------------|---------|---------|------|------------|
| 0 | log A1/s <sup>-1</sup> | 111.2664     | 190.7843     |         |         |      | 0.2817     |
| 1 | E1 kJ/mol              | 741.3758     | 1263.1556    |         |         | +    | 2.1976     |
| 2 | React.ord. 1           | 1.8374       | 2.5795       |         |         | +    | 7.3778E-2  |
| 3 | log Kcat 1             | 0.4500       | 0.5034       |         |         |      | 0.1442     |
| 4 | Area 1/(J/g)           | 53.1013      | 53.1013      |         |         |      | constant   |

## STATISTICS

|                          |            |                       |          |
|--------------------------|------------|-----------------------|----------|
| Least squares:           | 2.88370    | Number of cycles:     | 30       |
| Mean of residues:        | 8.92526E-2 | Max.No of cycles:     | 50       |
| Correlation coefficient: | 0.997413   | Rel. precision:       | 0.001000 |
| Durbin-Watson Value:     | 0.075      | t-critical(0.95;221): | 1.962    |
| Durbin-Watson Factor:    | 3.693      |                       |          |

## F-TEST ON FIT-QUALITY

| #  | Code | Fexp   | Fcrit(0.95) | f-act | Type 1 | Type 2 | Type 3 | Type 4 | Type 5 | Type 6 |
|----|------|--------|-------------|-------|--------|--------|--------|--------|--------|--------|
| 0  | s:   | 1.00   | 1.25        | 221   | Cn B   |        |        |        |        |        |
| 1  | s:   | 1.59   | 1.25        | 228   | Bna    |        |        |        |        |        |
| 2  | s:   | 1.69   | 1.25        | 229   | Fn     |        |        |        |        |        |
| 3  | s:   | 2.04   | 1.25        | 230   | B1     |        |        |        |        |        |
| 4  | s:   | 2.07   | 1.25        | 229   | C1 B   |        |        |        |        |        |
| 5  | s:   | 2.53   | 1.25        | 230   | F2     |        |        |        |        |        |
| 6  | s:   | 6.75   | 1.25        | 229   | An     |        |        |        |        |        |
| 7  | s:   | 8.53   | 1.25        | 230   | A2     |        |        |        |        |        |
| 8  | s:   | 11.60  | 1.25        | 230   | F1     |        |        |        |        |        |
| 9  | s:   | 20.89  | 1.25        | 230   | R3     |        |        |        |        |        |
| 10 | s:   | 24.63  | 1.25        | 230   | D1F    |        |        |        |        |        |
| 11 | s:   | 26.32  | 1.25        | 230   | D3F    |        |        |        |        |        |
| 12 | s:   | 27.04  | 1.25        | 230   | D3     |        |        |        |        |        |
| 13 | s:   | 28.30  | 1.25        | 230   | R2     |        |        |        |        |        |
| 14 | s:   | 40.12  | 1.25        | 230   | D4     |        |        |        |        |        |
| 15 | s:   | 50.07  | 1.25        | 230   | D2     |        |        |        |        |        |
| 16 | s:   | 76.34  | 1.25        | 230   | D1     |        |        |        |        |        |
| 17 | s:   | 364.77 | 1.25        | 230   | A3     |        |        |        |        |        |

# Sample 12 / cycle 2 / CnB

NETZSCH Thermokinetics 1

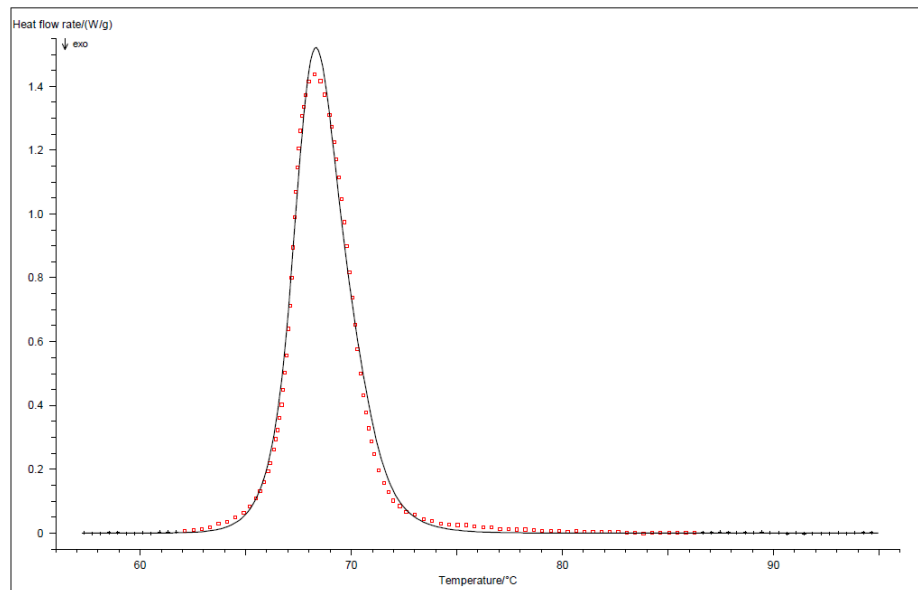

## NETZSCH Thermokinetics

Date/Time: 02.10.2016 at 18:18

Project: 1

Model 1: n-th order with autocatalysis by B

A → B

Start evaluation: 0.00050

Measurement type: DSC

Fine evaluation: 0.99950

SCAN 1

Identity:

OP320 08.05.2016 17:31:51/Segm.S2/3

Transfer Corr: 204\_F1.kcr

Min. Temp/°C: 57.3295

Min. Time/min: 0.0

Max. Temp/°C: 94.9516

Max. Time/min: 6.2932

Heating rate/(K/min): 5.978

Sampling time/s: 1.004

Sample mass/mg: 3.510

Base line type: tangent area prop.

LeftPts: 40

RightPts: 50

## PARAMETERS AND STANDARD DEVIATIONS

| # | Parameter              | Initial Val. | Optimum Val. | Minimum | Maximum | Sign | t*Std.Dev. |
|---|------------------------|--------------|--------------|---------|---------|------|------------|
| 0 | log A1/s <sup>-1</sup> | 103.4500     | 177.0302     |         |         |      | 0.2624     |
| 1 | E1 kJ/mol              | 685.4585     | 1165.1359    |         |         | +    | 2.0285     |
| 2 | React.ord. 1           | 1.8157       | 2.5081       |         |         | +    | 6.8714E-2  |
| 3 | log Kcat 1             | 0.4500       | 0.5328       |         |         |      | 0.1287     |
| 4 | Area 1/(J/g)           | 51.9763      | 51.9763      |         |         |      | constant   |

## STATISTICS

Least squares: 2.66993

Number of cycles: 46

Mean of residues: 8.41549E-2

Max.No of cycles: 50

Correlation coefficient: 0.997387

Rel. precision: 0.001000

Durbin-Watson Value: 0.073

t-critical(0.95;239): 1.961

Durbin-Watson Factor: 3.727

## F-TEST ON FIT-QUALITY

| #  | Code | Fexp   | Fcrit(0.95) | f-act | Type 1 | Type 2 | Type 3 | Type 4 | Type 5 | Type 6 |
|----|------|--------|-------------|-------|--------|--------|--------|--------|--------|--------|
| 0  | s:   | 1.00   | 1.24        | 239   | Cn B   |        |        |        |        |        |
| 1  | s:   | 1.86   | 1.24        | 228   | Bna    |        |        |        |        |        |
| 2  | s:   | 1.97   | 1.24        | 229   | Fn     |        |        |        |        |        |
| 3  | s:   | 2.38   | 1.24        | 230   | B1     |        |        |        |        |        |
| 4  | s:   | 2.42   | 1.24        | 229   | C1 B   |        |        |        |        |        |
| 5  | s:   | 2.96   | 1.24        | 230   | F2     |        |        |        |        |        |
| 6  | s:   | 7.89   | 1.24        | 229   | An     |        |        |        |        |        |
| 7  | s:   | 9.97   | 1.24        | 230   | A2     |        |        |        |        |        |
| 8  | s:   | 13.55  | 1.24        | 230   | F1     |        |        |        |        |        |
| 9  | s:   | 24.41  | 1.24        | 230   | R3     |        |        |        |        |        |
| 10 | s:   | 28.77  | 1.24        | 230   | D1F    |        |        |        |        |        |
| 11 | s:   | 30.74  | 1.24        | 230   | D3F    |        |        |        |        |        |
| 12 | s:   | 31.59  | 1.24        | 230   | D3     |        |        |        |        |        |
| 13 | s:   | 33.05  | 1.24        | 230   | R2     |        |        |        |        |        |
| 14 | s:   | 46.86  | 1.24        | 230   | D4     |        |        |        |        |        |
| 15 | s:   | 58.48  | 1.24        | 230   | D2     |        |        |        |        |        |
| 16 | s:   | 89.16  | 1.24        | 230   | D1     |        |        |        |        |        |
| 17 | s:   | 426.06 | 1.24        | 230   | A3     |        |        |        |        |        |

# Sample 12 / cycle 3 / CnB

NETZSCH Thermokinetics 1

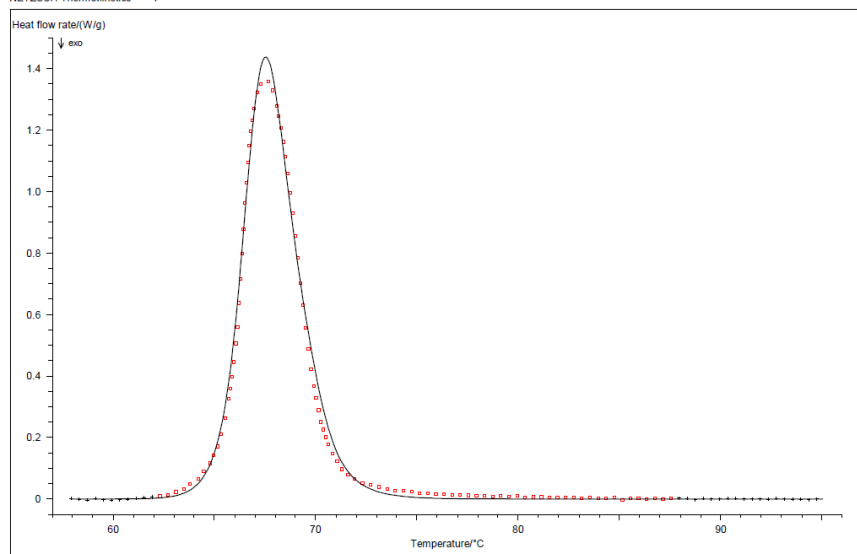

## NETZSCH Thermokinetics

Date/Time: 02.10.2016 at 18:20

Project: 1

Model 1: n-th order with autocatalysis by B

A → B

Start evaluation: 0.00050

Measurement type: DSC

Fine evaluation: 0.99950

SCAN 1

Identity:

OP320 08.05.2016 18:14:53/Segm.S2/3

Transfer Corr: 204 F1.kcr

Min. Temp/°C: 57.9281

Min. Time/min: 0.0

Max. Temp/°C: 95.0449

Max. Time/min: 6.2092

Heating rate/(K/min): 5.978

Sampling time/s: 1.004

Sample mass/mg: 3.510

Base line type: tangent area prop.

LeftPts: 40

RightPts: 50

## PARAMETERS AND STANDARD DEVIATIONS

| # | Parameter              | Initial Val. | Optimum Val. | Minimum | Maximum | Sign | t*Std.Dev. |
|---|------------------------|--------------|--------------|---------|---------|------|------------|
| 0 | log A1/s <sup>-1</sup> | 100.0134     | 198.6281     |         |         |      | 0.5749     |
| 1 | E1 kJ/mol              | 661.5171     | 1302.1281    |         |         | +    | 4.1965     |
| 2 | React.ord. 1           | 1.8310       | 2.6760       |         |         | +    | 9.4951E-2  |
| 3 | log Kcat 1             | 0.4500       | 0.2779       |         |         |      | 0.2501     |
| 4 | Area 1/(J/g)           | 50.0664      | 50.0664      |         |         |      | constant   |

## STATISTICS

Least squares: 2.22262

Number of cycles: 36

Mean of residues: 7.72967E-2

Max.No of cycles: 50

Correlation coefficient: 0.997662

Rel. precision: 0.001000

Durbin-Watson Value: 0.069

t-critical(0.95;250): 1.961

Durbin-Watson Factor: 3.835

## F-TEST ON FIT-QUALITY

| #  | Code | Fexp   | Fcrit(0.95) | f-act | Type 1 | Type 2 | Type 3 | Type 4 | Type 5 | Type 6 |
|----|------|--------|-------------|-------|--------|--------|--------|--------|--------|--------|
| 0  | s:   | 1.00   | 1.23        | 250   | Cn B   |        |        |        |        |        |
| 1  | s:   | 2.34   | 1.24        | 228   | Bna    |        |        |        |        |        |
| 2  | s:   | 2.47   | 1.24        | 229   | Fn     |        |        |        |        |        |
| 3  | s:   | 2.99   | 1.24        | 230   | B1     |        |        |        |        |        |
| 4  | s:   | 3.04   | 1.24        | 229   | C1 B   |        |        |        |        |        |
| 5  | s:   | 3.72   | 1.24        | 230   | F2     |        |        |        |        |        |
| 6  | s:   | 9.91   | 1.24        | 229   | An     |        |        |        |        |        |
| 7  | s:   | 12.53  | 1.24        | 230   | A2     |        |        |        |        |        |
| 8  | s:   | 17.02  | 1.24        | 230   | F1     |        |        |        |        |        |
| 9  | s:   | 30.67  | 1.24        | 230   | R3     |        |        |        |        |        |
| 10 | s:   | 36.16  | 1.24        | 230   | D1F    |        |        |        |        |        |
| 11 | s:   | 38.62  | 1.24        | 230   | D3F    |        |        |        |        |        |
| 12 | s:   | 39.69  | 1.24        | 230   | D3     |        |        |        |        |        |
| 13 | s:   | 41.53  | 1.24        | 230   | R2     |        |        |        |        |        |
| 14 | s:   | 58.88  | 1.24        | 230   | D4     |        |        |        |        |        |
| 15 | s:   | 73.48  | 1.24        | 230   | D2     |        |        |        |        |        |
| 16 | s:   | 112.04 | 1.24        | 230   | D1     |        |        |        |        |        |
| 17 | s:   | 535.36 | 1.24        | 230   | A3     |        |        |        |        |        |

# Sample 12 / cycle 4 / CnB

NETZSCH Thermokinetics 1

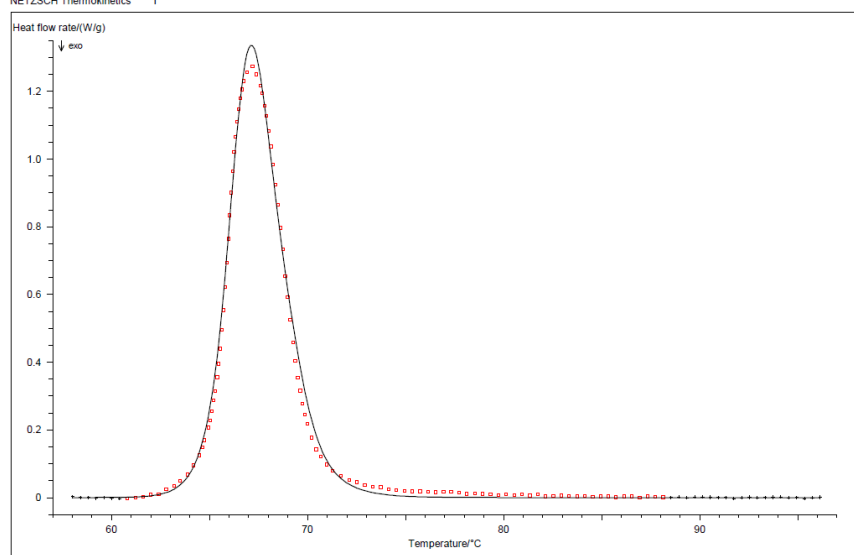

## NETZSCH Thermokinetics

Date/Time: 02.10.2016 at 18:21

Project: 1

Model 1: n-th order with autocatalysis by B

A → B

Start evaluation: 0.00050

Measurement type: DSC

Fine evaluation: 0.99950

SCAN 1

Identity:

OP320 08.05.2016 18:56:23/Segm.S2/3

Transfer Corr: 204\_F1.kcr

Min. Temp/°C: 58.0196

Min. Time/min: 0.0

Max. Temp/°C: 96.1368

Max. Time/min: 6.3765

Heating rate/(K/min): 5.978

Sampling time/s: 1.004

Sample mass/mg: 3.590

Base line type: tangent area prop.

LeftPts: 40

RightPts: 50

## PARAMETERS AND STANDARD DEVIATIONS

| # | Parameter              | Initial Val. | Optimum Val. | Minimum | Maximum | Sign | t*Std.Dev. |
|---|------------------------|--------------|--------------|---------|---------|------|------------|
| 0 | log A1/s <sup>-1</sup> | 113.1644     | 190.2537     |         |         |      | 0.4485     |
| 1 | E1 kJ/mol              | 746.0846     | 1246.1773    |         |         | +    | 3.3226     |
| 2 | React.ord. 1           | 2.0548       | 2.6422       |         |         | +    | 8.3800E-2  |
| 3 | log Kcat 1             | 0.4500       | 0.2699       |         |         |      | 0.2246     |
| 4 | Area 1/(J/g)           | 47.4723      | 47.4723      |         |         |      | constant   |

## STATISTICS

Least squares: 1.75318

Number of cycles: 38

Mean of residues: 6.77457E-2

Max.No of cycles: 50

Correlation coefficient: 0.997867

Rel. precision: 0.001000

Durbin-Watson Value: 0.059

t-critical(0.95;272): 1.960

Durbin-Watson Factor: 4.137

## F-TEST ON FIT-QUALITY

| #  | Code | Fexp   | Fcrit(0.95) | f-act | Type 1 | Type 2 | Type 3 | Type 4 | Type 5 | Type 6 |
|----|------|--------|-------------|-------|--------|--------|--------|--------|--------|--------|
| 0  | s:   | 1.00   | 1.22        | 272   | Cn B   |        |        |        |        |        |
| 1  | s:   | 3.22   | 1.24        | 228   | Bna    |        |        |        |        |        |
| 2  | s:   | 3.41   | 1.24        | 229   | Fn     |        |        |        |        |        |
| 3  | s:   | 4.12   | 1.23        | 230   | B1     |        |        |        |        |        |
| 4  | s:   | 4.20   | 1.24        | 229   | C1 B   |        |        |        |        |        |
| 5  | s:   | 5.13   | 1.23        | 230   | F2     |        |        |        |        |        |
| 6  | s:   | 13.67  | 1.24        | 229   | An     |        |        |        |        |        |
| 7  | s:   | 17.28  | 1.23        | 230   | A2     |        |        |        |        |        |
| 8  | s:   | 23.48  | 1.23        | 230   | F1     |        |        |        |        |        |
| 9  | s:   | 42.30  | 1.23        | 230   | R3     |        |        |        |        |        |
| 10 | s:   | 49.87  | 1.23        | 230   | D1F    |        |        |        |        |        |
| 11 | s:   | 53.28  | 1.23        | 230   | D3F    |        |        |        |        |        |
| 12 | s:   | 54.75  | 1.23        | 230   | D3     |        |        |        |        |        |
| 13 | s:   | 57.29  | 1.23        | 230   | R2     |        |        |        |        |        |
| 14 | s:   | 81.21  | 1.23        | 230   | D4     |        |        |        |        |        |
| 15 | s:   | 101.36 | 1.23        | 230   | D2     |        |        |        |        |        |
| 16 | s:   | 154.54 | 1.23        | 230   | D1     |        |        |        |        |        |
| 17 | s:   | 738.44 | 1.23        | 230   | A3     |        |        |        |        |        |

# Sample 12 / cycle 5 / CnB

NETZSCH Thermokinetics 1

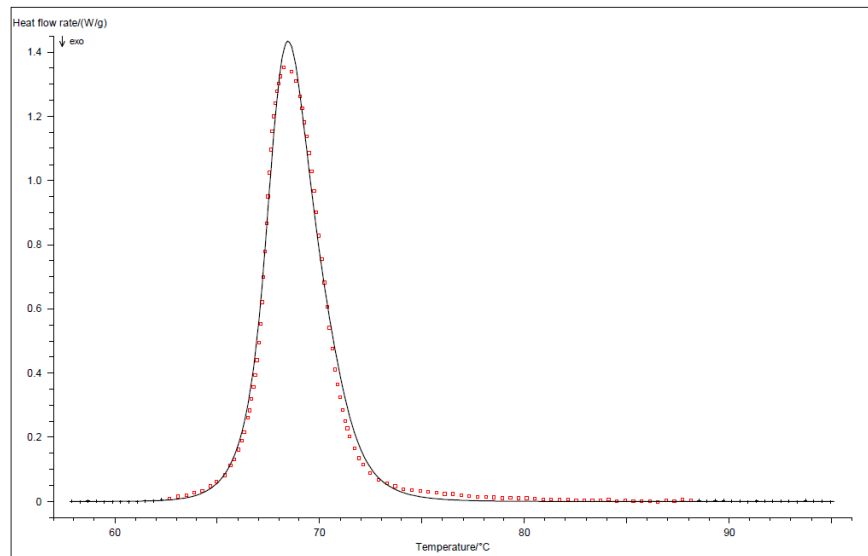

NETZSCH Thermokinetics

Date/Time: 02.10.2016 at 18:22

Project:

1

Model 1: n-th order with autocatalysis by B

A → B

Start evaluation: 0.00050

Measurement type: DSC

Fine evaluation: 0.99950

SCAN 1

Identity:

OP320 10.05.2016 11:06:30/Segm.S2/3

Transfer Corr: 204\_F1.kcr

Min. Temp/°C: 57.8882

Min. Time/min: 0.0

Max. Temp/°C: 95.1155

Max. Time/min: 6.2262

Heating rate/(K/min): 5.979

Sampling time/s: 1.004

Sample mass/mg: 3.590

Base line type: tangent area prop.

LeftPts: 40

RightPts: 50

## PARAMETERS AND STANDARD DEVIATIONS

| # | Parameter              | Initial Val. | Optimum Val. | Minimum | Maximum | Sign | t*Std.Dev. |
|---|------------------------|--------------|--------------|---------|---------|------|------------|
| 0 | log A1/s <sup>-1</sup> | 118.6294     | 151.5184     |         |         |      | 0.1179     |
| 1 | E1 kJ/mol              | 784.6287     | 1000.0203    |         |         | +    | 1.0079     |
| 2 | React.ord. 1           | 2.0816       | 2.4330       |         |         | +    | 5.7120E-2  |
| 3 | log Kcat 1             | 0.4500       | 0.7524       |         |         |      | 8.4728E-2  |
| 4 | Area 1/(J/g)           | 49.9103      | 49.9103      |         |         |      | constant   |

## STATISTICS

|                          |            |                       |          |
|--------------------------|------------|-----------------------|----------|
| Least squares:           | 2.24752    | Number of cycles:     | 40       |
| Mean of residues:        | 7.76243E-2 | Max.No of cycles:     | 50       |
| Correlation coefficient: | 0.997581   | Rel. precision:       | 0.001000 |
| Durbin-Watson Value:     | 0.068      | t-critical(0.95;254): | 1.960    |
| Durbin-Watson Factor:    | 3.874      |                       |          |

## F-TEST ON FIT-QUALITY

| #  | Code | Fexp   | Fcrit(0.95) | f-act | Type 1 | Type 2 | Type 3 | Type 4 | Type 5 | Type 6 |
|----|------|--------|-------------|-------|--------|--------|--------|--------|--------|--------|
| 0  | s:   | 1.00   | 1.23        | 254   | Cn B   |        |        |        |        |        |
| 1  | s:   | 2.35   | 1.24        | 228   | Bna    |        |        |        |        |        |
| 2  | s:   | 2.49   | 1.24        | 229   | Fn     |        |        |        |        |        |
| 3  | s:   | 3.00   | 1.24        | 230   | B1     |        |        |        |        |        |
| 4  | s:   | 3.06   | 1.24        | 229   | C1 B   |        |        |        |        |        |
| 5  | s:   | 3.73   | 1.24        | 230   | F2     |        |        |        |        |        |
| 6  | s:   | 9.96   | 1.24        | 229   | An     |        |        |        |        |        |
| 7  | s:   | 12.59  | 1.24        | 230   | A2     |        |        |        |        |        |
| 8  | s:   | 17.10  | 1.24        | 230   | F1     |        |        |        |        |        |
| 9  | s:   | 30.81  | 1.24        | 230   | R3     |        |        |        |        |        |
| 10 | s:   | 36.33  | 1.24        | 230   | D1F    |        |        |        |        |        |
| 11 | s:   | 38.81  | 1.24        | 230   | D3F    |        |        |        |        |        |
| 12 | s:   | 39.88  | 1.24        | 230   | D3     |        |        |        |        |        |
| 13 | s:   | 41.73  | 1.24        | 230   | R2     |        |        |        |        |        |
| 14 | s:   | 59.16  | 1.24        | 230   | D4     |        |        |        |        |        |
| 15 | s:   | 73.83  | 1.24        | 230   | D2     |        |        |        |        |        |
| 16 | s:   | 112.57 | 1.24        | 230   | D1     |        |        |        |        |        |
| 17 | s:   | 537.90 | 1.24        | 230   | A3     |        |        |        |        |        |

# Sample 12 / cycle 6 / CnB

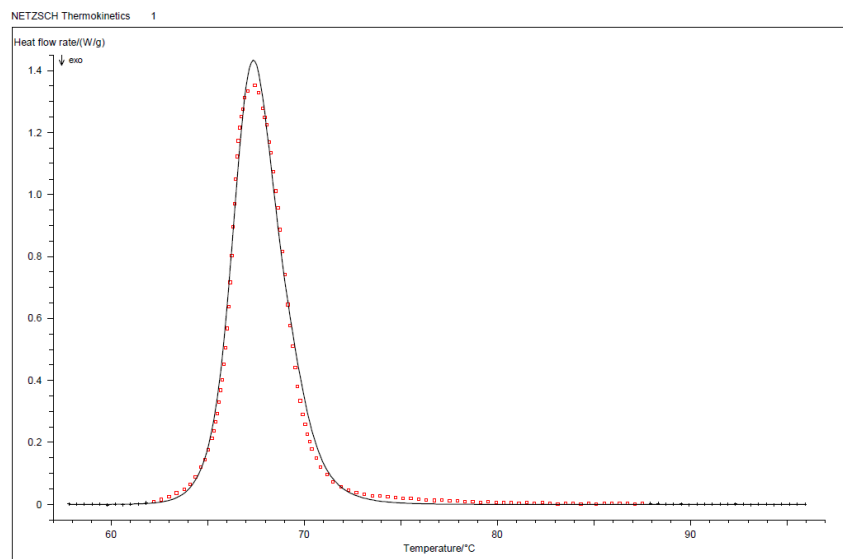

## NETZSCH Thermokinetics

Date/Time: 02.10.2016 at 18:24

Project: 1  
 Model 1: n-th order with autocatalysis by B A → 1 → B  
 Start evaluation: 0.00050 Measurement type: DSC  
 Fine evaluation: 0.99950  
 SCAN 1 Identity: OP320 10.05.2016 12:19:04/Segm.S2/3  
 Transfer Corr: 204\_F1.kcr  
 Min. Temp/°C: 57.8150 Min. Time/min: 0.0  
 Max. Temp/°C: 95.9355 Max. Time/min: 6.3773  
 Heating rate/(K/min): 5.978 Sampling time/s: 1.004  
 Sample mass/mg: 3.590  
 Base line type: tangent area prop. LeftPts: 40 RightPts: 50

## PARAMETERS AND STANDARD DEVIATIONS

| # | Parameter              | Initial Val. | Optimum Val. | Minimum | Maximum | Sign | t*Std.Dev. |
|---|------------------------|--------------|--------------|---------|---------|------|------------|
| 0 | log A1/s <sup>-1</sup> | 106.8482     | 191.2357     |         |         |      | 0.3828     |
| 1 | E1 kJ/mol              | 705.5683     | 1253.7668    |         |         | +    | 2.8795     |
| 2 | React.ord. 1           | 1.9044       | 2.6390       |         |         | +    | 8.1459E-2  |
| 3 | log Kcat 1             | 0.4500       | 0.4068       |         |         |      | 0.1806     |
| 4 | Area 1/(J/g)           | 49.1861      | 49.1861      |         |         |      | constant   |

## STATISTICS

Least squares: 2.42868 Number of cycles: 46  
 Mean of residues: 7.97358E-2 Max.No of cycles: 50  
 Correlation coefficient: 0.997326 Rel. precision: 0.001000  
 Durbin-Watson Value: 0.083 t-critical(0.95;251): 1.961  
 Durbin-Watson Factor: 3.507

## F-TEST ON FIT-QUALITY

| #  | Code | Fexp   | Fcrit(0.95) | f-act | Type 1 | Type 2 | Type 3 | Type 4 | Type 5 | Type 6 |
|----|------|--------|-------------|-------|--------|--------|--------|--------|--------|--------|
| 0  | s:   | 1.00   | 1.23        | 251   | Cn B   |        |        |        |        |        |
| 1  | s:   | 2.15   | 1.24        | 228   | Bna    |        |        |        |        |        |
| 2  | s:   | 2.27   | 1.24        | 229   | Fn     |        |        |        |        |        |
| 3  | s:   | 2.74   | 1.24        | 230   | B1     |        |        |        |        |        |
| 4  | s:   | 2.80   | 1.24        | 229   | C1 B   |        |        |        |        |        |
| 5  | s:   | 3.42   | 1.24        | 230   | F2     |        |        |        |        |        |
| 6  | s:   | 9.11   | 1.24        | 229   | An     |        |        |        |        |        |
| 7  | s:   | 11.51  | 1.24        | 230   | A2     |        |        |        |        |        |
| 8  | s:   | 15.64  | 1.24        | 230   | F1     |        |        |        |        |        |
| 9  | s:   | 28.18  | 1.24        | 230   | R3     |        |        |        |        |        |
| 10 | s:   | 33.22  | 1.24        | 230   | D1F    |        |        |        |        |        |
| 11 | s:   | 35.49  | 1.24        | 230   | D3F    |        |        |        |        |        |
| 12 | s:   | 36.47  | 1.24        | 230   | D3     |        |        |        |        |        |
| 13 | s:   | 38.16  | 1.24        | 230   | R2     |        |        |        |        |        |
| 14 | s:   | 54.10  | 1.24        | 230   | D4     |        |        |        |        |        |
| 15 | s:   | 67.52  | 1.24        | 230   | D2     |        |        |        |        |        |
| 16 | s:   | 102.94 | 1.24        | 230   | D1     |        |        |        |        |        |
| 17 | s:   | 491.90 | 1.24        | 230   | A3     |        |        |        |        |        |

# Sample 12 / cycle 7 / CnB

NETZSCH Thermokinetics 1

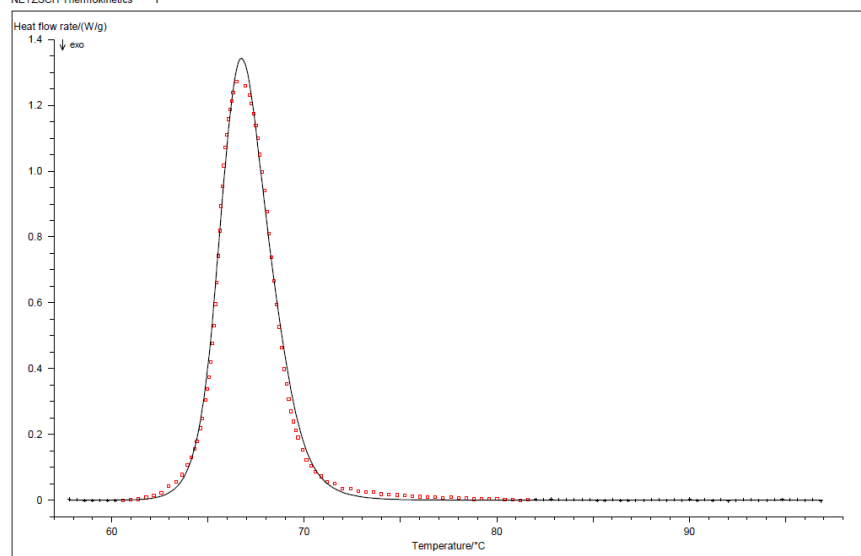

NETZSCH Thermokinetics

Date/Time: 02.10.2016 at 18:25

Project: 1

Model 1: n-th order with autocatalysis by B

A → 1 → B

Start evaluation: 0.00050

Measurement type: DSC

Fine evaluation: 0.99950

SCAN 1

Identity:

OP320 10.05.2016 13:07:36/Segm.S2/3

Transfer Corr: 204\_F1.kcr

Min. Temp/°C: 57.8006

Min. Time/min: 0.0

Max. Temp/°C: 96.9202

Max. Time/min: 6.5456

Heating rate/(K/min): 5.976

Sampling time/s: 1.004

Sample mass/mg: 3.590

Base line type: tangent area prop.

LeftPts: 40

RightPts: 50

## PARAMETERS AND STANDARD DEVIATIONS

| # | Parameter              | Initial Val. | Optimum Val. | Minimum | Maximum | Sign | t*Std.Dev. |
|---|------------------------|--------------|--------------|---------|---------|------|------------|
| 0 | log A1/s <sup>-1</sup> | 96.0626      | 217.3859     |         |         |      | 1.3840     |
| 1 | E1 kJ/mol              | 634.3342     | 1420.2485    |         |         | +    | 9.7384     |
| 2 | React.ord. 1           | 1.7644       | 2.6963       |         |         | +    | 0.1934     |
| 3 | log Kcat 1             | 0.4500       | -3.4406E-2   |         |         |      | 0.7069     |
| 4 | Area 1/(J/g)           | 46.5225      | 46.5225      |         |         |      | constant   |

## STATISTICS

|                          |            |                       |          |
|--------------------------|------------|-----------------------|----------|
| Least squares:           | 1.46878    | Number of cycles:     | 28       |
| Mean of residues:        | 6.12118E-2 | Max.No of cycles:     | 50       |
| Correlation coefficient: | 0.998079   | Rel. precision:       | 0.001000 |
| Durbin-Watson Value:     | 0.074      | t-critical(0.95;213): | 1.962    |
| Durbin-Watson Factor:    | 3.713      |                       |          |

## F-TEST ON FIT-QUALITY

| #  | Code | Fexp   | Fcrit(0.95) | f-act | Type 1 | Type 2 | Type 3 | Type 4 | Type 5 | Type 6 |
|----|------|--------|-------------|-------|--------|--------|--------|--------|--------|--------|
| 0  | s:   | 1.00   | 1.25        | 213   | Cn B   |        |        |        |        |        |
| 1  | s:   | 3.01   | 1.25        | 228   | Bna    |        |        |        |        |        |
| 2  | s:   | 3.19   | 1.25        | 229   | Fn     |        |        |        |        |        |
| 3  | s:   | 3.85   | 1.25        | 230   | B1     |        |        |        |        |        |
| 4  | s:   | 3.92   | 1.25        | 229   | C1 B   |        |        |        |        |        |
| 5  | s:   | 4.79   | 1.25        | 230   | F2     |        |        |        |        |        |
| 6  | s:   | 12.78  | 1.25        | 229   | An     |        |        |        |        |        |
| 7  | s:   | 16.15  | 1.25        | 230   | A2     |        |        |        |        |        |
| 8  | s:   | 21.95  | 1.25        | 230   | F1     |        |        |        |        |        |
| 9  | s:   | 39.54  | 1.25        | 230   | R3     |        |        |        |        |        |
| 10 | s:   | 46.62  | 1.25        | 230   | D1F    |        |        |        |        |        |
| 11 | s:   | 49.80  | 1.25        | 230   | D3F    |        |        |        |        |        |
| 12 | s:   | 51.17  | 1.25        | 230   | D3     |        |        |        |        |        |
| 13 | s:   | 53.55  | 1.25        | 230   | R2     |        |        |        |        |        |
| 14 | s:   | 75.91  | 1.25        | 230   | D4     |        |        |        |        |        |
| 15 | s:   | 94.74  | 1.25        | 230   | D2     |        |        |        |        |        |
| 16 | s:   | 144.45 | 1.25        | 230   | D1     |        |        |        |        |        |
| 17 | s:   | 690.24 | 1.25        | 230   | A3     |        |        |        |        |        |

# Sample 12 / cycle 8 / CnB

NETZSCH Thermokinetics 1

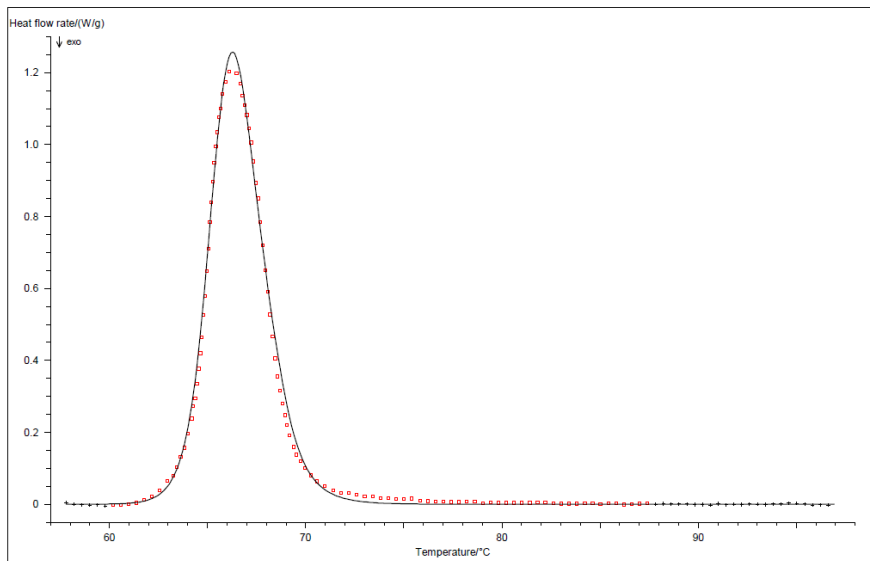

## NETZSCH Thermokinetics

Date/Time: 02.10.2016 at 18:26

Project: 1

Model 1: n-th order with autocatalysis by B

A → 1 → B

Start evaluation: 0.00050

Measurement type: DSC

Fine evaluation: 0.99950

SCAN 1

Identity:

OP320 10.05.2016 13:49:34/Segm.S2/3

Transfer Corr: 204\_F1.kcr

Min. Temp/°C: 57.8028

Min. Time/min: 0.0

Max. Temp/°C: 96.9197

Max. Time/min: 6.5454

Heating rate/(K/min): 5.976

Sampling time/s: 1.004

Sample mass/mg: 3.590

Base line type: tangent area prop.

LeftPts: 40

RightPts: 50

## PARAMETERS AND STANDARD DEVIATIONS

| # | Parameter              | Initial Val. | Optimum Val. | Minimum | Maximum | Sign | t*Std.Dev. |
|---|------------------------|--------------|--------------|---------|---------|------|------------|
| 0 | log A1/s <sup>-1</sup> | 100.6290     | 208.9708     |         |         |      | 1.2333     |
| 1 | E1 kJ/mol              | 663.0398     | 1363.6365    |         |         | +    | 8.6475     |
| 2 | React.ord. 1           | 1.8819       | 2.6377       |         |         | +    | 0.1816     |
| 3 | log Kcat 1             | 0.4500       | -0.1521      |         |         |      | 0.7660     |
| 4 | Area 1/(J/g)           | 44.8269      | 44.8269      |         |         |      | constant   |

## STATISTICS

Least squares: 1.17668

Number of cycles: 38

Mean of residues: 5.47880E-2

Max.No of cycles: 50

Correlation coefficient: 0.998380

Rel. precision: 0.001000

Durbin-Watson Value: 0.083

t-critical(0.95;271): 1.960

Durbin-Watson Factor: 3.517

## F-TEST ON FIT-QUALITY

| #  | Code | Fexp    | Fcrit(0.95) | f-act | Type 1 | Type 2 | Type 3 | Type 4 | Type 5 | Type 6 |
|----|------|---------|-------------|-------|--------|--------|--------|--------|--------|--------|
| 0  | s:   | 1.00    | 1.22        | 271   | Cn B   |        |        |        |        |        |
| 1  | s:   | 4.78    | 1.24        | 228   | Bna    |        |        |        |        |        |
| 2  | s:   | 5.07    | 1.24        | 229   | Fn     |        |        |        |        |        |
| 3  | s:   | 6.12    | 1.23        | 230   | B1     |        |        |        |        |        |
| 4  | s:   | 6.23    | 1.24        | 229   | C1 B   |        |        |        |        |        |
| 5  | s:   | 7.61    | 1.23        | 230   | F2     |        |        |        |        |        |
| 6  | s:   | 20.29   | 1.24        | 229   | An     |        |        |        |        |        |
| 7  | s:   | 25.65   | 1.23        | 230   | A2     |        |        |        |        |        |
| 8  | s:   | 34.86   | 1.23        | 230   | F1     |        |        |        |        |        |
| 9  | s:   | 62.79   | 1.23        | 230   | R3     |        |        |        |        |        |
| 10 | s:   | 74.03   | 1.23        | 230   | D1F    |        |        |        |        |        |
| 11 | s:   | 79.09   | 1.23        | 230   | D3F    |        |        |        |        |        |
| 12 | s:   | 81.27   | 1.23        | 230   | D3     |        |        |        |        |        |
| 13 | s:   | 85.04   | 1.23        | 230   | R2     |        |        |        |        |        |
| 14 | s:   | 120.55  | 1.23        | 230   | D4     |        |        |        |        |        |
| 15 | s:   | 150.46  | 1.23        | 230   | D2     |        |        |        |        |        |
| 16 | s:   | 229.41  | 1.23        | 230   | D1     |        |        |        |        |        |
| 17 | s:   | 1096.19 | 1.23        | 230   | A3     |        |        |        |        |        |

# Sample 12 / cycle 9 / CnB

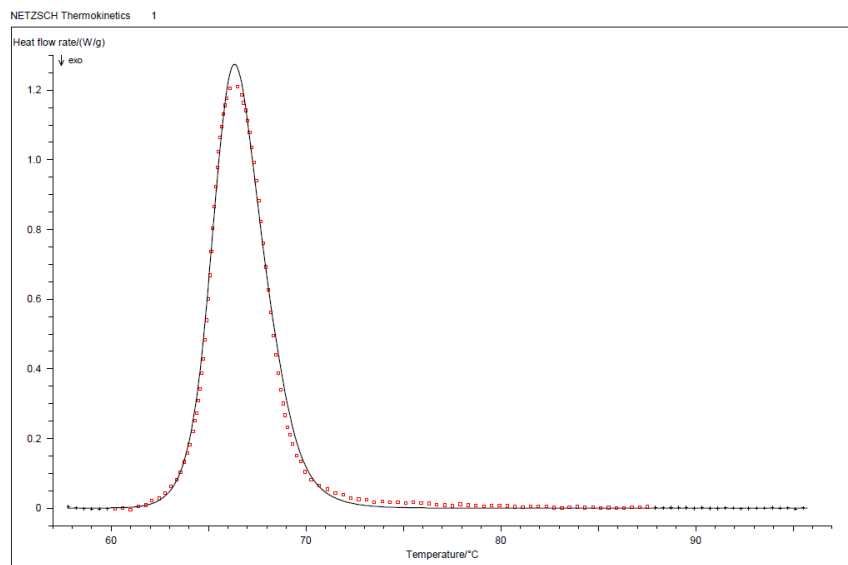

## NETZSCH Thermokinetics

Date/Time: 02.10.2016 at 18:28

Project: 1

Model 1: n-th order with autocatalysis by B

A → B

Start evaluation: 0.00050

Measurement type: DSC

Fine evaluation: 0.99950

SCAN 1

Identity:

OP320 10.05.2016 14:30:57/Segm.S2/3

Transfer Corr: 204\_F1.kcr

Min. Temp/°C: 57.8058

Min. Time/min: 0.0

Max. Temp/°C: 95.7260

Max. Time/min: 6.3420

Heating rate/(K/min): 5.979

Sampling time/s: 1.004

Sample mass/mg: 3.590

Base line type: tangent area prop.

LeftPts: 40

RightPts: 50

## PARAMETERS AND STANDARD DEVIATIONS

| # | Parameter              | Initial Val. | Optimum Val. | Minimum | Maximum | Sign | t*Std.Dev. |
|---|------------------------|--------------|--------------|---------|---------|------|------------|
| 0 | log A1/s <sup>-1</sup> | 101.4546     | 204.7274     |         |         |      | 0.9988     |
| 1 | E1 kJ/mol              | 668.4994     | 1336.5919    |         |         | +    | 7.0905     |
| 2 | React.ord. 1           | 1.9040       | 2.6810       |         |         | +    | 0.1450     |
| 3 | log Kcat 1             | 0.4500       | 3.1726E-2    |         |         |      | 0.5059     |
| 4 | Area 1/(J/g)           | 45.2092      | 45.2092      |         |         |      | constant   |

## STATISTICS

Least squares: 1.38530

Number of cycles: 34

Mean of residues: 6.03783E-2

Max.No of cycles: 50

Correlation coefficient: 0.998176

Rel. precision: 0.001000

Durbin-Watson Value: 0.065

t-critical(0.95;272): 1.960

Durbin-Watson Factor: 3.949

## F-TEST ON FIT-QUALITY

| #  | Code | Fexp   | Fcrit(0.95) | f-act | Type 1 | Type 2 | Type 3 | Type 4 | Type 5 | Type 6 |
|----|------|--------|-------------|-------|--------|--------|--------|--------|--------|--------|
| 0  | s:   | 1.00   | 1.22        | 272   | Cn B   |        |        |        |        |        |
| 1  | s:   | 4.08   | 1.24        | 228   | Bna    |        |        |        |        |        |
| 2  | s:   | 4.32   | 1.24        | 229   | Fn     |        |        |        |        |        |
| 3  | s:   | 5.21   | 1.23        | 230   | B1     |        |        |        |        |        |
| 4  | s:   | 5.31   | 1.24        | 229   | C1 B   |        |        |        |        |        |
| 5  | s:   | 6.49   | 1.23        | 230   | F2     |        |        |        |        |        |
| 6  | s:   | 17.30  | 1.24        | 229   | An     |        |        |        |        |        |
| 7  | s:   | 21.87  | 1.23        | 230   | A2     |        |        |        |        |        |
| 8  | s:   | 29.72  | 1.23        | 230   | F1     |        |        |        |        |        |
| 9  | s:   | 53.53  | 1.23        | 230   | R3     |        |        |        |        |        |
| 10 | s:   | 63.11  | 1.23        | 230   | D1F    |        |        |        |        |        |
| 11 | s:   | 67.42  | 1.23        | 230   | D3F    |        |        |        |        |        |
| 12 | s:   | 69.29  | 1.23        | 230   | D3     |        |        |        |        |        |
| 13 | s:   | 72.50  | 1.23        | 230   | R2     |        |        |        |        |        |
| 14 | s:   | 102.78 | 1.23        | 230   | D4     |        |        |        |        |        |
| 15 | s:   | 128.27 | 1.23        | 230   | D2     |        |        |        |        |        |
| 16 | s:   | 195.58 | 1.23        | 230   | D1     |        |        |        |        |        |
| 17 | s:   | 934.54 | 1.23        | 230   | A3     |        |        |        |        |        |

# Sample 13 / cycle 1 / CnB

NETZSCH Thermokinetics 1

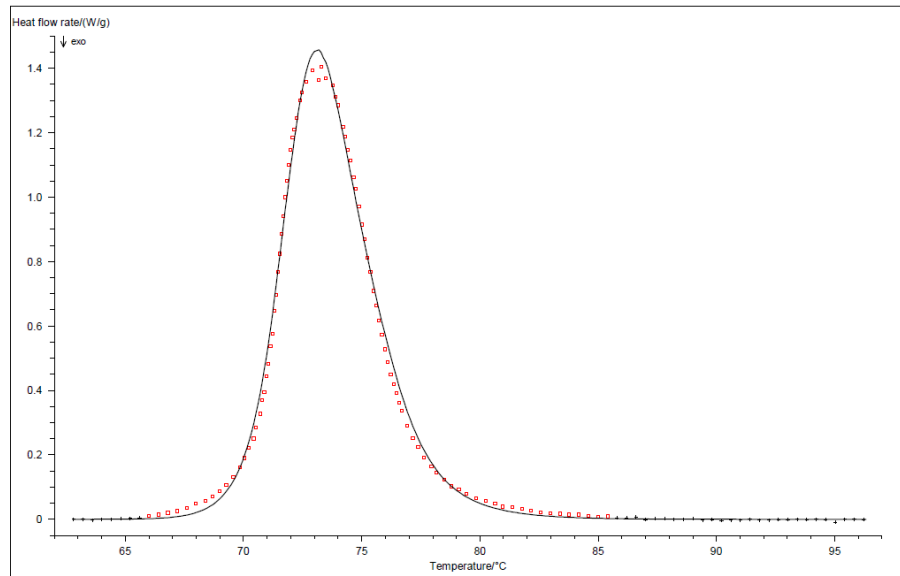

## NETZSCH Thermokinetics

Date/Time: 02.10.2016 at 14:48

Project: 1

Model 1: n-th order with autocatalysis by B

A → B

Start evaluation: 0.00050

Measurement type: DSC

Fine evaluation: 0.99950

SCAN 1

Identity:

OP320 27.06.2016 15:34:13/Segm.S1/3

Transfer Corr: 204\_F1.kcr

Min. Temp/°C: 62.8057

Min. Time/min: 0.0

Max. Temp/°C: 96.3237

Max. Time/min: 3.7324

Heating rate/(K/min): 8.980

Sampling time/s: 0.670

Sample mass/mg: 4.100

Base line type:

LeftPts: 30

RightPts: 30

## PARAMETERS AND STANDARD DEVIATIONS

| # | Parameter              | Initial Val. | Optimum Val. | Minimum | Maximum | Sign | t*Std.Dev. |
|---|------------------------|--------------|--------------|---------|---------|------|------------|
| 0 | log A1/s <sup>-1</sup> | 65.9868      | 163.1361     |         |         |      | 1.3743E-2  |
| 1 | E1 kJ/mol              | 446.8769     | 1087.3034    |         |         | +    | 0.3219     |
| 2 | React.ord. 1           | 1.7090       | 2.9823       |         |         | +    | 8.8537E-2  |
| 3 | log Kcat 1             | 0.4500       | 0.1307       |         |         |      | 0.1023     |
| 4 | Area 1/(J/g)           | 46.7341      | 46.7341      |         |         |      | constant   |

## STATISTICS

|                          |            |                       |          |
|--------------------------|------------|-----------------------|----------|
| Least squares:           | 2.12728    | Number of cycles:     | 21       |
| Mean of residues:        | 7.96875E-2 | Max.No of cycles:     | 50       |
| Correlation coefficient: | 0.998245   | Rel. precision:       | 0.001000 |
| Durbin-Watson Value:     | 0.109      | t-critical(0.95;194): | 1.963    |
| Durbin-Watson Factor:    | 3.066      |                       |          |

## F-TEST ON FIT-QUALITY

| #  | Code | Fexp   | Fcrit(0.95) | f-act | Type 1 | Type 2 | Type 3 | Type 4 | Type 5 | Type 6 |
|----|------|--------|-------------|-------|--------|--------|--------|--------|--------|--------|
| 0  | s:   | 1.00   | 1.27        | 194   | Cn B   |        |        |        |        |        |
| 1  | s:   | 1.23   | 1.27        | 195   | Fn     |        |        |        |        |        |
| 2  | s:   | 1.40   | 1.27        | 195   | C1 B   |        |        |        |        |        |
| 3  | s:   | 3.53   | 1.27        | 196   | F2     |        |        |        |        |        |
| 4  | s:   | 7.98   | 1.27        | 195   | An     |        |        |        |        |        |
| 5  | s:   | 13.22  | 1.27        | 196   | A2     |        |        |        |        |        |
| 6  | s:   | 17.59  | 1.27        | 196   | F1     |        |        |        |        |        |
| 7  | s:   | 20.84  | 1.27        | 196   | A3     |        |        |        |        |        |
| 8  | s:   | 30.61  | 1.27        | 196   | R3     |        |        |        |        |        |
| 9  | s:   | 33.50  | 1.27        | 196   | D1F    |        |        |        |        |        |
| 10 | s:   | 36.50  | 1.27        | 196   | D3F    |        |        |        |        |        |
| 11 | s:   | 37.73  | 1.27        | 196   | D3     |        |        |        |        |        |
| 12 | s:   | 40.50  | 1.27        | 196   | R2     |        |        |        |        |        |
| 13 | s:   | 54.64  | 1.27        | 196   | D4     |        |        |        |        |        |
| 14 | s:   | 68.70  | 1.27        | 196   | D2     |        |        |        |        |        |
| 15 | s:   | 100.64 | 1.27        | 196   | D1     |        |        |        |        |        |

## NETZSCH Thermokinetics

Date/Time: 02.10.2016 at 14:54

Project: 1

Model 1: n-th order with autocatalysis by B

A → 1 → B

Start evaluation: 0.00050

Measurement type: DSC

Fine evaluation: 0.99950

SCAN 1 Identity: 204\_F1.kcr OP320 27.06.2016 16:05:07/Segm.S1/3

Transfer Corr: 58.2038

Min. Temp/°C: 58.2038

Min. Time/min: 0.0

Max. Temp/°C: 88.5867

Max. Time/min: 3.4067

Heating rate/(K/min): 8.918

Sampling time/s: 0.670

Sample mass/mg: 4.100

Base line type: LeftPts: 102

RightPts: 100

## PARAMETERS AND STANDARD DEVIATIONS

| # | Parameter              | Initial Val. | Optimum Val. | Minimum | Maximum | Sign | t*Std.Dev. |
|---|------------------------|--------------|--------------|---------|---------|------|------------|
| 0 | log A1/s <sup>-1</sup> | 60.6060      | 162.1685     |         |         |      | 1.5287E-2  |
| 1 | E1 kJ/mol              | 409.7811     | 1076.3667    |         |         | +    | 0.3501     |
| 2 | React.ord. 1           | 1.3847       | 2.4198       |         |         | +    | 0.1018     |
| 3 | log Kcat 1             | 0.4500       | -0.1509      |         |         |      | 0.1351     |
| 4 | Area 1/(J/g)           | 48.2167      | 48.2167      |         |         |      | constant   |

## STATISTICS

|                          |            |                       |          |
|--------------------------|------------|-----------------------|----------|
| Least squares:           | 2.22038    | Number of cycles:     | 23       |
| Mean of residues:        | 8.51830E-2 | Max.No of cycles:     | 50       |
| Correlation coefficient: | 0.998626   | Rel. precision:       | 0.001000 |
| Durbin-Watson Value:     | 0.032      | t-critical(0.95;193): | 1.963    |
| Durbin-Watson Factor:    | 5.599      |                       |          |

## F-TEST ON FIT-QUALITY

| #  | Code | Fexp   | Fcrit(0.95) | f-act | Type 1 | Type 2 | Type 3 | Type 4 | Type 5 | Type 6 |
|----|------|--------|-------------|-------|--------|--------|--------|--------|--------|--------|
| 0  | s:   | 1.00   | 1.27        | 193   | Cn B   |        |        |        |        |        |
| 1  | s:   | 1.10   | 1.27        | 194   | Fn     |        |        |        |        |        |
| 2  | s:   | 1.23   | 1.27        | 195   | B1     |        |        |        |        |        |
| 3  | s:   | 1.29   | 1.27        | 194   | C1 B   |        |        |        |        |        |
| 4  | s:   | 1.66   | 1.27        | 195   | F2     |        |        |        |        |        |
| 5  | s:   | 6.38   | 1.27        | 193   | Bna    |        |        |        |        |        |
| 6  | s:   | 7.51   | 1.27        | 194   | An     |        |        |        |        |        |
| 7  | s:   | 9.90   | 1.27        | 195   | A2     |        |        |        |        |        |
| 8  | s:   | 14.16  | 1.27        | 195   | F1     |        |        |        |        |        |
| 9  | s:   | 17.58  | 1.27        | 195   | A3     |        |        |        |        |        |
| 10 | s:   | 28.27  | 1.27        | 195   | R3     |        |        |        |        |        |
| 11 | s:   | 33.04  | 1.27        | 195   | D1F    |        |        |        |        |        |
| 12 | s:   | 35.90  | 1.27        | 195   | D3F    |        |        |        |        |        |
| 13 | s:   | 37.15  | 1.27        | 195   | D3     |        |        |        |        |        |
| 14 | s:   | 39.59  | 1.27        | 195   | R2     |        |        |        |        |        |
| 15 | s:   | 57.00  | 1.27        | 195   | D4     |        |        |        |        |        |
| 16 | s:   | 74.62  | 1.27        | 195   | D2     |        |        |        |        |        |
| 17 | s:   | 116.62 | 1.27        | 195   | D1     |        |        |        |        |        |

# Sample 13 / cycle 3 / CnB

NETZSCH Thermokinetics 1

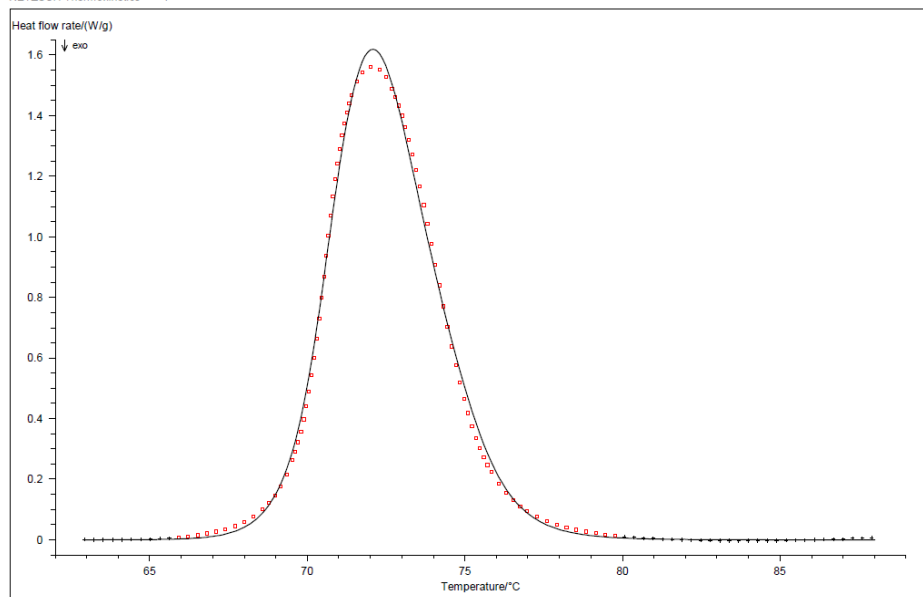

NETZSCH Thermokinetics

Date/Time: 02.10.2016 at 15:07

Project: 1

Model 1: Prout-Tompkins n-th order, a autocat

A → B

Start evaluation: 0.00050

Measurement type: DSC

Fine evaluation: 0.99950

SCAN 1

Identity:

OP320 27.06.2016 17:55:36/Segm.S1/3

Transfer Corr: 204\_F1.kcr

Min. Temp/°C: 62.9208

Min. Time/min: 0.0

Max. Temp/°C: 88.0067

Max. Time/min: 2.7997

Heating rate/(K/min): 8.960

Sampling time/s: 0.672

Sample mass/mg: 4.100

Base line type: tangent area prop.

LeftPts: 20

RightPts: 70

## PARAMETERS AND STANDARD DEVIATIONS

| # | Parameter              | Initial Val. | Optimum Val. | Minimum | Maximum | Sign | t*Std.Dev. |
|---|------------------------|--------------|--------------|---------|---------|------|------------|
| 0 | log A1/s <sup>-1</sup> | 25.0106      | 151.0600     |         |         |      | 2.3748E-2  |
| 1 | E1 kJ/mol              | 172.2698     | 1003.1475    |         |         | +    | 0.1558     |
| 2 | React.ord. 1           | 0.8687       | 2.1999       |         |         | +    | 9.3763E-2  |
| 3 | Exponent a1            | 0.5205       | 0.2204       |         |         | +    | 2.7768E-2  |
| 4 | Area 1/(J/g)           | 46.8653      | 46.8653      |         |         |      | constant   |

## STATISTICS

|                          |            |                       |          |
|--------------------------|------------|-----------------------|----------|
| Least squares:           | 2.21469    | Number of cycles:     | 17       |
| Mean of residues:        | 9.39332E-2 | Max.No of cycles:     | 50       |
| Correlation coefficient: | 0.998691   | Rel. precision:       | 0.001000 |
| Durbin-Watson Value:     | 0.044      | t-critical(0.95;138): | 1.968    |
| Durbin-Watson Factor:    | 4.801      |                       |          |

## F-TEST ON FIT-QUALITY

| #  | Code | Fexp   | Fcrit(0.95) | f-act | Type 1 | Type 2 | Type 3 | Type 4 | Type 5 | Type 6 |
|----|------|--------|-------------|-------|--------|--------|--------|--------|--------|--------|
| 0  | s:   | 1.00   | 1.33        | 138   | Bna    |        |        |        |        |        |
| 1  | s:   | 1.04   | 1.33        | 139   | Fn     |        |        |        |        |        |
| 2  | s:   | 2.08   | 1.33        | 138   | Cn B   |        |        |        |        |        |
| 3  | s:   | 2.77   | 1.33        | 139   | C1 B   |        |        |        |        |        |
| 4  | s:   | 2.83   | 1.32        | 140   | F2     |        |        |        |        |        |
| 5  | s:   | 4.73   | 1.32        | 140   | B1     |        |        |        |        |        |
| 6  | s:   | 7.26   | 1.33        | 139   | An     |        |        |        |        |        |
| 7  | s:   | 14.08  | 1.32        | 140   | A2     |        |        |        |        |        |
| 8  | s:   | 21.08  | 1.32        | 140   | F1     |        |        |        |        |        |
| 9  | s:   | 39.67  | 1.32        | 140   | R3     |        |        |        |        |        |
| 10 | s:   | 47.67  | 1.32        | 140   | D1F    |        |        |        |        |        |
| 11 | s:   | 50.94  | 1.32        | 140   | D3F    |        |        |        |        |        |
| 12 | s:   | 52.21  | 1.32        | 140   | D3     |        |        |        |        |        |
| 13 | s:   | 54.24  | 1.32        | 140   | R2     |        |        |        |        |        |
| 14 | s:   | 60.29  | 1.32        | 140   | A3     |        |        |        |        |        |
| 15 | s:   | 78.17  | 1.32        | 140   | D4     |        |        |        |        |        |
| 16 | s:   | 97.99  | 1.32        | 140   | D2     |        |        |        |        |        |
| 17 | s:   | 145.20 | 1.32        | 140   | D1     |        |        |        |        |        |

# Sample 13 / cycle 4 / CnB

NETZSCH Thermokinetics 1

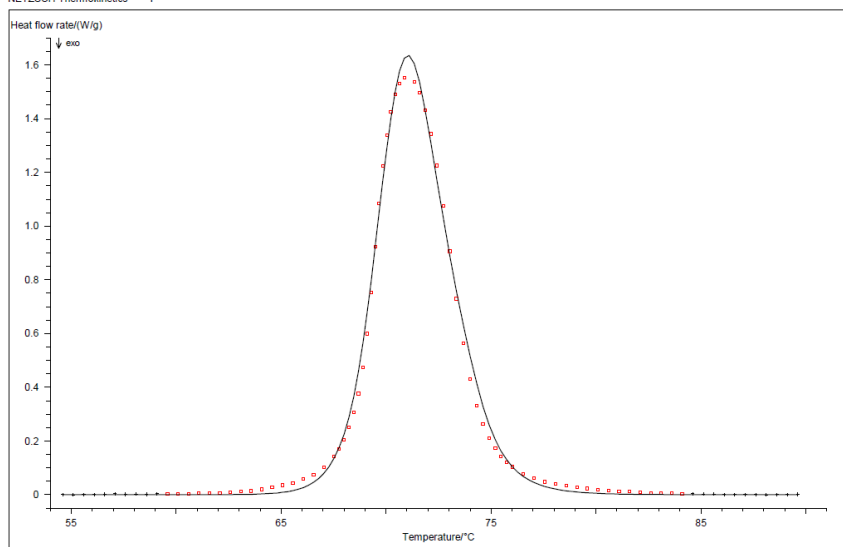

NETZSCH Thermokinetics

Date/Time: 02.10.2016 at 15:11

Project: 1

Model 1: n-th order with autocatalysis by B

A → B

Start evaluation: 0.00050

Measurement type: DSC

Fine evaluation: 0.99950

SCAN 1

Identity:

OP320 27.06.2016 18:34:46/Segm.S1/3

Transfer Corr: 204\_F1.kcr

Min. Temp/°C: 54.6004

Min. Time/min: 0.0

Max. Temp/°C: 89.6176

Max. Time/min: 3.9143

Heating rate/(K/min): 8.946

Sampling time/s: 1.678

Sample mass/mg: 4.100

Base line type: tangent area prop.

LeftPts: 5

RightPts: 5

## PARAMETERS AND STANDARD DEVIATIONS

| # | Parameter              | Initial Val. | Optimum Val. | Minimum | Maximum | Sign | t*Std.Dev. |
|---|------------------------|--------------|--------------|---------|---------|------|------------|
| 0 | log A1/s <sup>-1</sup> | 71.7332      | 163.2366     |         |         |      | 2.5427E-2  |
| 1 | E1 kJ/mol              | 481.8720     | 1081.2562    |         |         | +    | 0.5760     |
| 2 | React.ord. 1           | 1.5971       | 2.5488       |         |         | +    | 0.1805     |
| 3 | log Kcat 1             | 0.4500       | -4.7244E-3   |         |         |      | 0.1813     |
| 4 | Area 1/(J/g)           | 49.1561      | 49.1561      |         |         |      | constant   |

## STATISTICS

|                          |          |                      |          |
|--------------------------|----------|----------------------|----------|
| Least squares:           | 3.61527  | Number of cycles:    | 21       |
| Mean of residues:        | 0.16013  | Max.No of cycles:    | 50       |
| Correlation coefficient: | 0.997697 | Rel. precision:      | 0.001000 |
| Durbin-Watson Value:     | 0.195    | t-critical(0.95;96): | 1.976    |
| Durbin-Watson Factor:    | 2.322    |                      |          |

## F-TEST ON FIT-QUALITY

| #  | Code | Fexp    | Fcrit(0.95) | f-act | Type 1 | Type 2 | Type 3 | Type 4 | Type 5 | Type 6 |
|----|------|---------|-------------|-------|--------|--------|--------|--------|--------|--------|
| 0  | s:   | 1.00    | 1.40        | 96    | Cn B   |        |        |        |        |        |
| 1  | s:   | 1.08    | 1.40        | 97    | Fn     |        |        |        |        |        |
| 2  | s:   | 1.10    | 1.40        | 98    | B1     |        |        |        |        |        |
| 3  | s:   | 1.19    | 1.40        | 97    | C1 B   |        |        |        |        |        |
| 4  | s:   | 1.58    | 1.40        | 98    | F2     |        |        |        |        |        |
| 5  | s:   | 5.09    | 1.40        | 97    | An     |        |        |        |        |        |
| 6  | s:   | 6.05    | 1.40        | 98    | A2     |        |        |        |        |        |
| 7  | s:   | 8.50    | 1.40        | 98    | F1     |        |        |        |        |        |
| 8  | s:   | 15.90   | 1.40        | 98    | A3     |        |        |        |        |        |
| 9  | s:   | 15.99   | 1.40        | 98    | R3     |        |        |        |        |        |
| 10 | s:   | 18.54   | 1.40        | 98    | D1F    |        |        |        |        |        |
| 11 | s:   | 20.30   | 1.40        | 98    | D3F    |        |        |        |        |        |
| 12 | s:   | 20.96   | 1.40        | 98    | D3     |        |        |        |        |        |
| 13 | s:   | 22.29   | 1.40        | 98    | R2     |        |        |        |        |        |
| 14 | s:   | 31.40   | 1.40        | 98    | D4     |        |        |        |        |        |
| 15 | s:   | 45.12   | 1.40        | 98    | D2     |        |        |        |        |        |
| 16 | s:   | 62.61   | 1.40        | 98    | D1     |        |        |        |        |        |
| 17 | s:   | 1064.75 | 1.40        | 96    | Bna    |        |        |        |        |        |

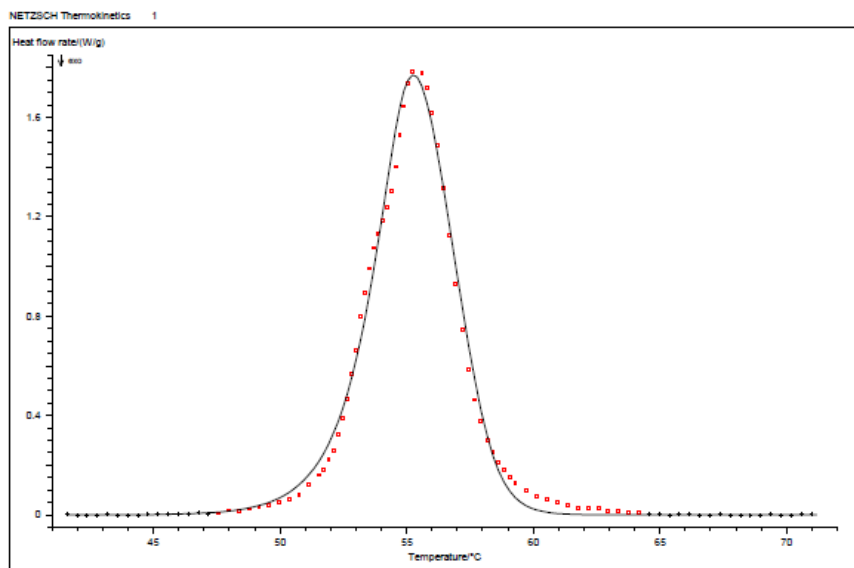

## NETZSCH Thermokinetics

Date/Time: 04.10.2016 at 14:08

Project: 1

Model 1: n-th order with autocatalysis by B

A → 1 → B

Start evaluation: 0.00050

Measurement type: DSC

Fine evaluation: 0.99950

SCAN 1

Identity:

OP320 08.04.2016 12:36:46/Segm.S1/3

Transfer Corr:

204\_F1.kcr

Min. Temp/°C:

41.5858

Min. Time/min:

0.0

Max. Temp/°C:

71.1736

Max. Time/min:

3.3078

Heating rate/(K/min):

8.945

Sampling time/s:

1.341

Sample mass/mg:

2.800

Base line type:

tangent area prop.

LeftPts: 25

RightPts: 25

## PARAMETERS AND STANDARD DEVIATIONS

| # | Parameter              | Initial Val. | Optimum Val. | Minimum | Maximum | Sign | t*Std.Dev. |
|---|------------------------|--------------|--------------|---------|---------|------|------------|
| 0 | log A1/s <sup>-1</sup> | 77.9509      | 100.9311     |         |         |      | 4.9770E-2  |
| 1 | E1 kJ/mol              | 498.9482     | 642.0715     |         |         | +    | 0.9274     |
| 2 | React.ord. 1           | 1.3512       | 1.5018       |         |         | +    | 0.4545     |
| 3 | log Kcat 1             | 0.4500       | 0.2302       |         |         |      | 6.3181E-2  |
| 4 | Area 1/(J/g)           | 49.7760      | 49.7760      |         |         |      | constant   |

## STATISTICS

Least squares:

7.51554

Number of cycles:

19

Mean of residues:

0.22459

Max.No of cycles:

50

Correlation coefficient:

0.995799

Rel. precision:

0.001000

Durbin-Watson Value:

0.164

t-critical(0.95;82):

1.980

Durbin-Watson Factor:

2.525

## F-TEST ON FIT-QUALITY

| #  | Code | Fexp  | Fcrit(0.95) | f-act | Type 1 | Type 2 | Type 3 | Type 4 | Type 5 | Type 6 |
|----|------|-------|-------------|-------|--------|--------|--------|--------|--------|--------|
| 0  | s:   | 1.00  | 1.44        | 82    | Cn B   |        |        |        |        |        |
| 1  | s:   | 1.10  | 1.44        | 83    | C1 B   |        |        |        |        |        |
| 2  | s:   | 1.27  | 1.44        | 83    | Fn     |        |        |        |        |        |
| 3  | s:   | 1.53  | 1.44        | 83    | An     |        |        |        |        |        |
| 4  | s:   | 1.54  | 1.44        | 84    | B1     |        |        |        |        |        |
| 5  | s:   | 1.63  | 1.44        | 84    | A3     |        |        |        |        |        |
| 6  | s:   | 1.78  | 1.44        | 84    | A2     |        |        |        |        |        |
| 7  | s:   | 1.95  | 1.44        | 84    | F2     |        |        |        |        |        |
| 8  | s:   | 2.25  | 1.44        | 84    | F1     |        |        |        |        |        |
| 9  | s:   | 5.28  | 1.44        | 84    | R3     |        |        |        |        |        |
| 10 | s:   | 5.52  | 1.44        | 84    | D1F    |        |        |        |        |        |
| 11 | s:   | 5.96  | 1.44        | 84    | D3F    |        |        |        |        |        |
| 12 | s:   | 6.55  | 1.44        | 84    | D3     |        |        |        |        |        |
| 13 | s:   | 8.19  | 1.44        | 84    | R2     |        |        |        |        |        |
| 14 | s:   | 11.80 | 1.44        | 84    | D4     |        |        |        |        |        |
| 15 | s:   | 16.35 | 1.44        | 84    | D2     |        |        |        |        |        |
| 16 | s:   | 29.83 | 1.44        | 84    | D1     |        |        |        |        |        |

# Sample 15 / cycle 3 / CnB

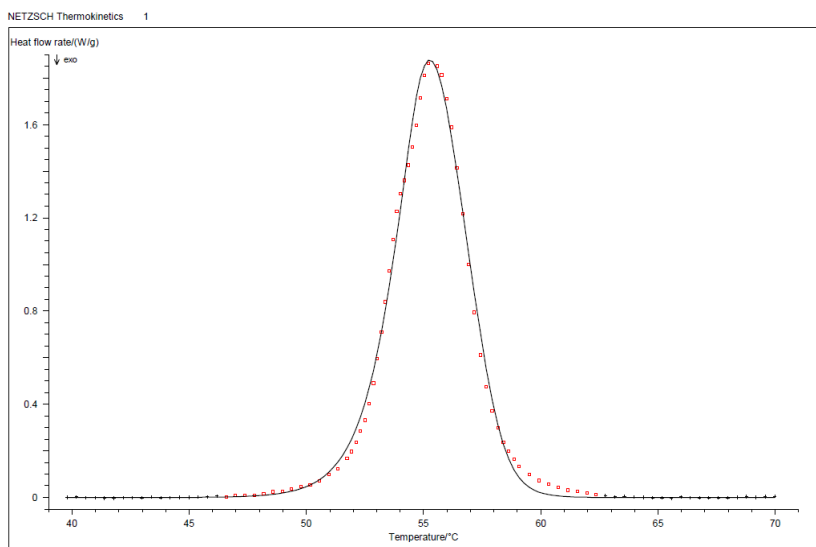

## NETZSCH Thermokinetics

Date/Time: 04.10.2016 at 14:06

Project: 1

Model 1: n-th order with autocatalysis by B

A → B

Start evaluation: 0.00050

Measurement type: DSC

Fine evaluation: 0.99950

SCAN 1

Identity:

OP320 08.04.2016 13:16:26/Segm.S1/3

Transfer Corr: 204\_F1.kcr

Min. Temp/°C: 39.7895

Min. Time/min: 0.0

Max. Temp/°C: 69.9776

Max. Time/min: 3.3746

Heating rate/(K/min): 8.946

Sampling time/s: 1.341

Sample mass/mg: 2.800

Base line type: tangent area prop.

LeftPts: 30

RightPts: 30

## PARAMETERS AND STANDARD DEVIATIONS

| # | Parameter              | Initial Val. | Optimum Val. | Minimum | Maximum | Sign | t*Std.Dev. |
|---|------------------------|--------------|--------------|---------|---------|------|------------|
| 0 | log A1/s <sup>-1</sup> | 55.7714      | 121.6263     |         |         |      | 6.7202E-2  |
| 1 | E1 kJ/mol              | 360.0400     | 771.2089     |         |         | +    | 0.9924     |
| 2 | React.ord. 1           | 1.0651       | 1.5842       |         |         | +    | 0.1768     |
| 3 | log Kcat 1             | 0.4500       | -4.6182E-2   |         |         |      | 0.3075     |
| 4 | Area 1/(J/g)           | 50.8102      | 50.8102      |         |         |      | constant   |

## STATISTICS

Least squares: 5.13259

Number of cycles: 20

Mean of residues: 0.18376

Max.No of cycles: 50

Correlation coefficient: 0.997313

Rel. precision: 0.001000

Durbin-Watson Value: 0.197

t-critical(0.95;77): 1.982

Durbin-Watson Factor: 2.312

## F-TEST ON FIT-QUALITY

| #  | Code | Fexp  | Fcrit(0.95) | f-act | Type 1 | Type 2 | Type 3 | Type 4 | Type 5 | Type 6 |
|----|------|-------|-------------|-------|--------|--------|--------|--------|--------|--------|
| 0  | s:   | 1.00  | 1.46        | 77    | Cn B   |        |        |        |        |        |
| 1  | s:   | 1.16  | 1.46        | 78    | Fn     |        |        |        |        |        |
| 2  | s:   | 1.28  | 1.46        | 78    | C1 B   |        |        |        |        |        |
| 3  | s:   | 1.69  | 1.46        | 79    | B1     |        |        |        |        |        |
| 4  | s:   | 1.84  | 1.46        | 79    | F2     |        |        |        |        |        |
| 5  | s:   | 2.12  | 1.46        | 78    | An     |        |        |        |        |        |
| 6  | s:   | 2.14  | 1.46        | 79    | A3     |        |        |        |        |        |
| 7  | s:   | 2.33  | 1.46        | 79    | A2     |        |        |        |        |        |
| 8  | s:   | 3.13  | 1.46        | 79    | F1     |        |        |        |        |        |
| 9  | s:   | 8.27  | 1.46        | 79    | R3     |        |        |        |        |        |
| 10 | s:   | 9.33  | 1.46        | 79    | D1F    |        |        |        |        |        |
| 11 | s:   | 9.86  | 1.46        | 79    | D3F    |        |        |        |        |        |
| 12 | s:   | 10.57 | 1.46        | 79    | D3     |        |        |        |        |        |
| 13 | s:   | 12.90 | 1.46        | 79    | R2     |        |        |        |        |        |
| 14 | s:   | 19.06 | 1.46        | 79    | D4     |        |        |        |        |        |
| 15 | s:   | 25.43 | 1.46        | 79    | D2     |        |        |        |        |        |
| 16 | s:   | 47.72 | 1.46        | 79    | D1     |        |        |        |        |        |

# Sample 15 / cycle 4 / CnB

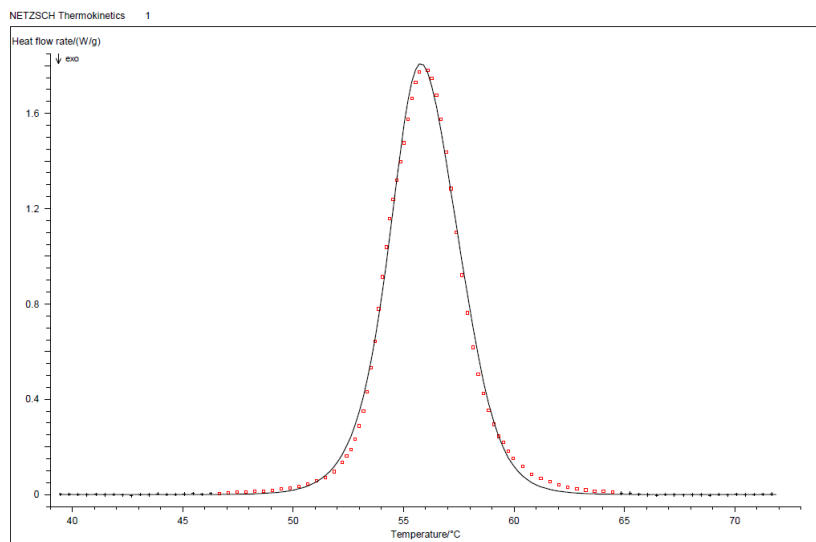

## NETZSCH Thermokinetics

Date/Time: 04.10.2016 at 14:04

Project: 1

Model 1: n-th order with autocatalysis by B

A → B

Start evaluation: 0.00050

Measurement type: DSC

Fine evaluation: 0.99950

SCAN 1

Identity:

OP320 11.04.2016 14:04:20/Segm.S1/1

Transfer Corr:

204 F1.kor

Min. Temp/°C:

39.4751

Min. Time/min:

0.0

Max. Temp/°C:

71.8624

Max. Time/min:

3.6230

Heating rate/(K/min):

8.939

Sampling time/s:

1.342

Sample mass/mg:

2.800

Base line type:

tangent area prop.

LeftPts: 30

RightPts: 30

## PARAMETERS AND STANDARD DEVIATIONS

| # | Parameter              | Initial Val. | Optimum Val. | Minimum | Maximum | Sign | t*Std.Dev. |
|---|------------------------|--------------|--------------|---------|---------|------|------------|
| 0 | log A1/s <sup>-1</sup> | 83.2931      | 136.8992     |         |         |      | 2.9766E-2  |
| 1 | E1 kJ/mol              | 533.0454     | 868.1465     |         |         | +    | 0.6075     |
| 2 | React.ord. 1           | 1.6039       | 2.0037       |         |         | +    | 0.2204     |
| 3 | log Kcat 1             | 0.4500       | -6.1090E-2   |         |         |      | 0.1516     |
| 4 | Area 1/(J/g)           | 51.1448      | 51.1448      |         |         |      | constant   |

## STATISTICS

Least squares:

3.56840

Number of cycles:

21

Mean of residues:

0.14796

Max.No of cycles:

50

Correlation coefficient:

0.997992

Rel. precision:

0.001000

Durbin-Watson Value:

0.175

t-critical(0.95;86):

1.979

Durbin-Watson Factor:

2.448

## F-TEST ON FIT-QUALITY

| #  | Code | Fexp  | Fcrit(0.95) | f-act | Type 1 | Type 2 | Type 3 | Type 4 | Type 5 | Type 6 |
|----|------|-------|-------------|-------|--------|--------|--------|--------|--------|--------|
| 0  | s:   | 1.00  | 1.43        | 86    | Cn B   |        |        |        |        |        |
| 1  | s:   | 1.16  | 1.43        | 88    | F2     |        |        |        |        |        |
| 2  | s:   | 1.17  | 1.43        | 87    | Fn     |        |        |        |        |        |
| 3  | s:   | 1.19  | 1.43        | 88    | B1     |        |        |        |        |        |
| 4  | s:   | 1.24  | 1.43        | 87    | C1 B   |        |        |        |        |        |
| 5  | s:   | 5.21  | 1.43        | 87    | An     |        |        |        |        |        |
| 6  | s:   | 5.26  | 1.43        | 88    | A3     |        |        |        |        |        |
| 7  | s:   | 5.64  | 1.43        | 88    | A2     |        |        |        |        |        |
| 8  | s:   | 7.27  | 1.43        | 88    | F1     |        |        |        |        |        |
| 9  | s:   | 15.93 | 1.43        | 88    | R3     |        |        |        |        |        |
| 10 | s:   | 17.55 | 1.43        | 88    | D1F    |        |        |        |        |        |
| 11 | s:   | 18.68 | 1.43        | 88    | D3F    |        |        |        |        |        |
| 12 | s:   | 19.63 | 1.43        | 88    | D3     |        |        |        |        |        |
| 13 | s:   | 23.68 | 1.43        | 88    | R2     |        |        |        |        |        |
| 14 | s:   | 31.70 | 1.43        | 88    | D4     |        |        |        |        |        |
| 15 | s:   | 43.28 | 1.43        | 88    | D2     |        |        |        |        |        |
| 16 | s:   | 70.70 | 1.43        | 88    | D1     |        |        |        |        |        |

# Sample 15 / cycle 5 / CnB

NETZSCH Thermokinetics 1

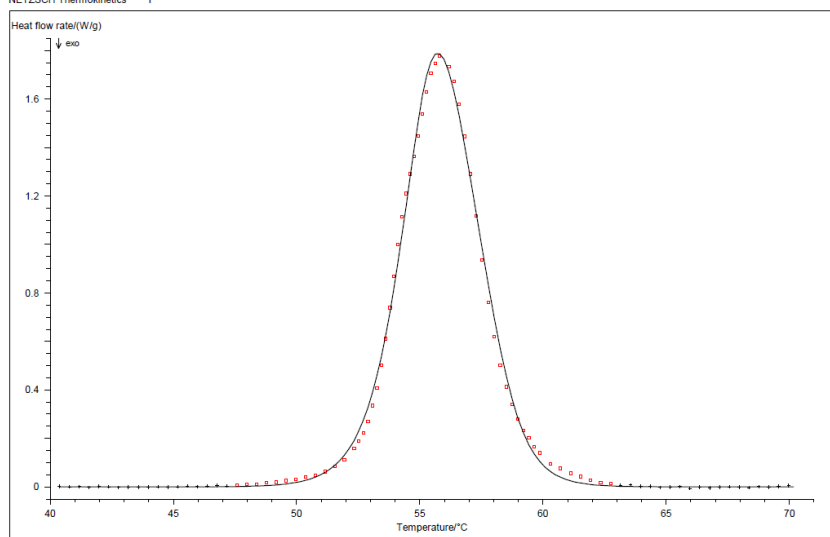

NETZSCH Thermokinetics

Date/Time: 04.10.2016 at 14:02

Project: 1

Model 1: n-th order with autocatalysis by B

A-1→B

Start evaluation: 0.00050

Measurement type: DSC

Fine evaluation: 0.99950

SCAN 1

Identity:

OP320 12.04.2016 10:38:01/Segm.S1/1

Transfer Corr: 204\_F1.kcr

Min. Temp/°C: 40.3786

Min. Time/min: 0.0

Max. Temp/°C: 70.1669

Max. Time/min: 3.3347

Heating rate/(K/min): 8.933

Sampling time/s: 1.343

Sample mass/mg: 2.800

Base line type: tangent area prop.

LeftPts: 30

RightPts: 30

## PARAMETERS AND STANDARD DEVIATIONS

| # | Parameter              | Initial Val. | Optimum Val. | Minimum | Maximum | Sign | t*Std.Dev. |
|---|------------------------|--------------|--------------|---------|---------|------|------------|
| 0 | log A1/s <sup>-1</sup> | 69.9847      | 139.1724     |         |         |      | 0.2408     |
| 1 | E1 kJ/mol              | 449.5754     | 882.1656     |         |         | +    | 2.4608     |
| 2 | React.ord. 1           | 1.3663       | 1.9223       |         |         | +    | 0.1003     |
| 3 | log Kcat 1             | 0.4500       | -0.1881      |         |         |      | 0.9867     |
| 4 | Area 1/(J/g)           | 49.8439      | 49.8439      |         |         |      | constant   |

## STATISTICS

|                          |          |                      |          |
|--------------------------|----------|----------------------|----------|
| Least squares:           | 3.08812  | Number of cycles:    | 21       |
| Mean of residues:        | 0.14348  | Max.No of cycles:    | 50       |
| Correlation coefficient: | 0.998252 | Rel. precision:      | 0.001000 |
| Durbin-Watson Value:     | 0.184    | t-critical(0.95;75): | 1.983    |
| Durbin-Watson Factor:    | 2.386    |                      |          |

## F-TEST ON FIT-QUALITY

| #  | Code | Fexp  | Fcrit(0.95) | f-act | Type 1 | Type 2 | Type 3 | Type 4 | Type 5 | Type 6 |
|----|------|-------|-------------|-------|--------|--------|--------|--------|--------|--------|
| 0  | s:   | 1.00  | 1.47        | 75    | Cn B   |        |        |        |        |        |
| 1  | s:   | 1.13  | 1.47        | 76    | Fn     |        |        |        |        |        |
| 2  | s:   | 1.17  | 1.46        | 77    | F2     |        |        |        |        |        |
| 3  | s:   | 1.37  | 1.46        | 77    | B1     |        |        |        |        |        |
| 4  | s:   | 1.42  | 1.47        | 76    | C1 B   |        |        |        |        |        |
| 5  | s:   | 5.39  | 1.47        | 76    | An     |        |        |        |        |        |
| 6  | s:   | 5.47  | 1.46        | 77    | A3     |        |        |        |        |        |
| 7  | s:   | 5.90  | 1.46        | 77    | A2     |        |        |        |        |        |
| 8  | s:   | 7.75  | 1.46        | 77    | F1     |        |        |        |        |        |
| 9  | s:   | 18.00 | 1.46        | 77    | R3     |        |        |        |        |        |
| 10 | s:   | 20.16 | 1.46        | 77    | D1F    |        |        |        |        |        |
| 11 | s:   | 21.30 | 1.46        | 77    | D3F    |        |        |        |        |        |
| 12 | s:   | 22.36 | 1.46        | 77    | D3     |        |        |        |        |        |
| 13 | s:   | 27.25 | 1.46        | 77    | R2     |        |        |        |        |        |
| 14 | s:   | 36.96 | 1.46        | 77    | D4     |        |        |        |        |        |
| 15 | s:   | 49.87 | 1.46        | 77    | D2     |        |        |        |        |        |
| 16 | s:   | 83.58 | 1.46        | 77    | D1     |        |        |        |        |        |

# Sample 15 / cycle 6 / CnB

NETZSCH Thermokinetics 1

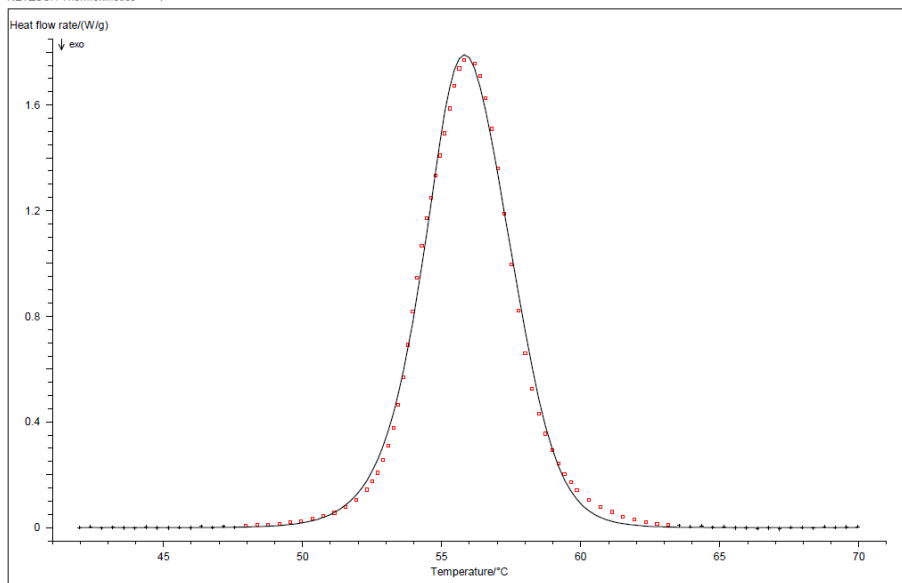

NETZSCH Thermokinetics

Date/Time: 04.10.2016 at 14:00

Project:

1

Model 1: n-th order with autocatalysis by B

A → 1 → B

Start evaluation: 0.00050

Measurement type:

DSC

Fine evaluation: 0.99950

SCAN 1

Identity:

OP320 12.04.2016 12:20:03/Segm.S1/3

Transfer Corr: 204\_F1.kcr

Min. Temp/°C: 41.9711

Min. Time/min:

0.0

Max. Temp/°C: 69.9583

Max. Time/min:

3.1325

Heating rate/(K/min): 8.934

Sampling time/s:

1.343

Sample mass/mg: 2.800

Base line type: tangent area prop.

LeftPts: 25

RightPts: 25

## PARAMETERS AND STANDARD DEVIATIONS

| # | Parameter              | Initial Val. | Optimum Val. | Minimum | Maximum | Sign | t*Std.Dev. |
|---|------------------------|--------------|--------------|---------|---------|------|------------|
| 0 | log A1/s <sup>-1</sup> | 68.9758      | 137.3423     |         |         |      | 9.1658E-2  |
| 1 | E1 kJ/mol              | 443.3497     | 870.8960     |         |         | +    | 1.3776     |
| 2 | React.ord. 1           | 1.3483       | 1.8746       |         |         | +    | 0.1189     |
| 3 | log Kcat 1             | 0.4500       | -0.1921      |         |         |      | 0.6922     |
| 4 | Area 1/(J/g)           | 49.6585      | 49.6585      |         |         |      | constant   |

## STATISTICS

Least squares: 3.61456

Number of cycles:

20

Mean of residues: 0.16011

Max.No of cycles:

50

Correlation coefficient: 0.998061

Rel. precision:

0.001000

Durbin-Watson Value: 0.182

t-critical(0.95;74):

1.983

Durbin-Watson Factor: 2.399

## F-TEST ON FIT-QUALITY

| #  | Code | Fexp  | Fcrit(0.95) | f-act | Type 1 | Type 2 | Type 3 | Type 4 | Type 5 | Type 6 |
|----|------|-------|-------------|-------|--------|--------|--------|--------|--------|--------|
| 0  | s:   | 1.00  | 1.47        | 74    | Cn B   |        |        |        |        |        |
| 1  | s:   | 1.12  | 1.47        | 75    | Fn     |        |        |        |        |        |
| 2  | s:   | 1.21  | 1.47        | 76    | F2     |        |        |        |        |        |
| 3  | s:   | 1.39  | 1.47        | 75    | C1 B   |        |        |        |        |        |
| 4  | s:   | 1.44  | 1.47        | 76    | B1     |        |        |        |        |        |
| 5  | s:   | 4.33  | 1.47        | 75    | An     |        |        |        |        |        |
| 6  | s:   | 4.61  | 1.47        | 76    | A3     |        |        |        |        |        |
| 7  | s:   | 5.03  | 1.47        | 76    | A2     |        |        |        |        |        |
| 8  | s:   | 6.62  | 1.47        | 76    | F1     |        |        |        |        |        |
| 9  | s:   | 15.58 | 1.47        | 76    | R3     |        |        |        |        |        |
| 10 | s:   | 17.56 | 1.47        | 76    | D1F    |        |        |        |        |        |
| 11 | s:   | 18.46 | 1.47        | 76    | D3F    |        |        |        |        |        |
| 12 | s:   | 19.50 | 1.47        | 76    | D3     |        |        |        |        |        |
| 13 | s:   | 23.25 | 1.47        | 76    | R2     |        |        |        |        |        |
| 14 | s:   | 32.55 | 1.47        | 76    | D4     |        |        |        |        |        |
| 15 | s:   | 44.50 | 1.47        | 76    | D2     |        |        |        |        |        |
| 16 | s:   | 74.08 | 1.47        | 76    | D1     |        |        |        |        |        |

# Sample 15 / cycle 7 / CnB

NETZSCH Thermokinetics 1

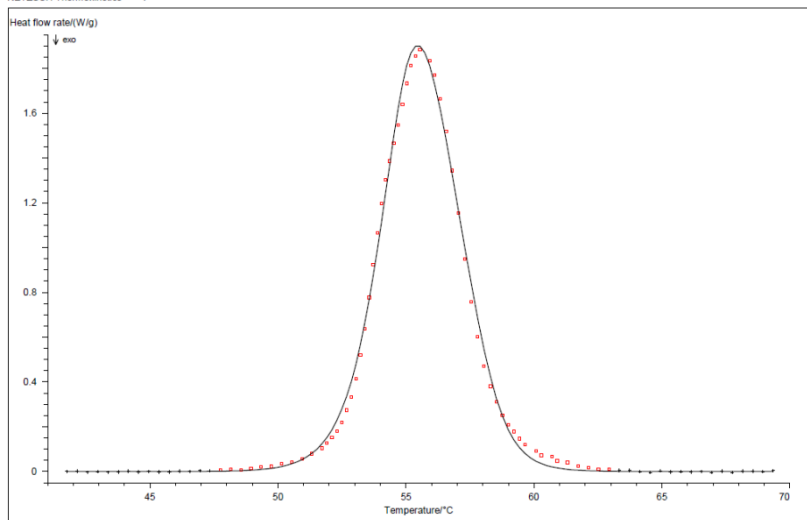

## NETZSCH Thermokinetics

Date/Time: 04.10.2016 at 13:58

Project: 1

Model 1: n-th order with autocatalysis by B

A → 1 → B

Start evaluation: 0.00050

Measurement type: DSC

Fine evaluation: 0.99950

SCAN 1

Identity:

OP320 13.04.2016 11:49:44/Segm.S1/3

Transfer Corr: 204\_F1.kcr

Min. Temp/°C: 41.7555

Min. Time/min: 0.0

Max. Temp/°C: 69.3435

Max. Time/min: 3.0976

Heating rate/(K/min): 8.906

Sampling time/s: 1.347

Sample mass/mg: 2.800

Base line type: tangent area prop.

LeftPts: 25

RightPts: 25

## PARAMETERS AND STANDARD DEVIATIONS

| # | Parameter              | Initial Val. | Optimum Val. | Minimum | Maximum | Sign | t*Std.Dev. |
|---|------------------------|--------------|--------------|---------|---------|------|------------|
| 0 | log A1/s <sup>-1</sup> | 62.6322      | 150.6634     |         |         |      | 3.7122E-2  |
| 1 | E1 kJ/mol              | 403.1482     | 953.2817     |         |         | +    | 0.7483     |
| 2 | React.ord. 1           | 1.2389       | 1.8828       |         |         | +    | 0.2630     |
| 3 | log Kcat 1             | 0.4500       | -0.5363      |         |         |      | 0.3977     |
| 4 | Area 1/(J/g)           | 51.8524      | 51.8524      |         |         |      | constant   |

## STATISTICS

Least squares: 4.21886

Number of cycles: 22

Mean of residues: 0.17422

Max.No of cycles: 50

Correlation coefficient: 0.998023

Rel. precision: 0.001000

Durbin-Watson Value: 0.189

t-critical(0.95;73): 1.984

Durbin-Watson Factor: 2.357

## F-TEST ON FIT-QUALITY

| #  | Code | Fexp  | Fcrit(0.95) | f-act | Type 1 | Type 2 | Type 3 | Type 4 | Type 5 | Type 6 |
|----|------|-------|-------------|-------|--------|--------|--------|--------|--------|--------|
| 0  | s:   | 1.00  | 1.48        | 73    | Cn B   |        |        |        |        |        |
| 1  | s:   | 1.02  | 1.47        | 74    | Fn     |        |        |        |        |        |
| 2  | s:   | 1.08  | 1.47        | 75    | F2     |        |        |        |        |        |
| 3  | s:   | 1.65  | 1.47        | 74    | C1 B   |        |        |        |        |        |
| 4  | s:   | 1.66  | 1.47        | 75    | B1     |        |        |        |        |        |
| 5  | s:   | 4.28  | 1.47        | 74    | An     |        |        |        |        |        |
| 6  | s:   | 4.38  | 1.47        | 75    | A3     |        |        |        |        |        |
| 7  | s:   | 4.78  | 1.47        | 75    | A2     |        |        |        |        |        |
| 8  | s:   | 6.44  | 1.47        | 75    | F1     |        |        |        |        |        |
| 9  | s:   | 15.20 | 1.47        | 75    | R3     |        |        |        |        |        |
| 10 | s:   | 17.76 | 1.47        | 75    | D1F    |        |        |        |        |        |
| 11 | s:   | 18.55 | 1.47        | 75    | D3F    |        |        |        |        |        |
| 12 | s:   | 19.41 | 1.47        | 75    | D3     |        |        |        |        |        |
| 13 | s:   | 22.42 | 1.47        | 75    | R2     |        |        |        |        |        |
| 14 | s:   | 31.86 | 1.47        | 75    | D4     |        |        |        |        |        |
| 15 | s:   | 42.23 | 1.47        | 75    | D2     |        |        |        |        |        |
| 16 | s:   | 73.18 | 1.47        | 75    | D1     |        |        |        |        |        |

## Sample 18 / cycle 1 / CnB

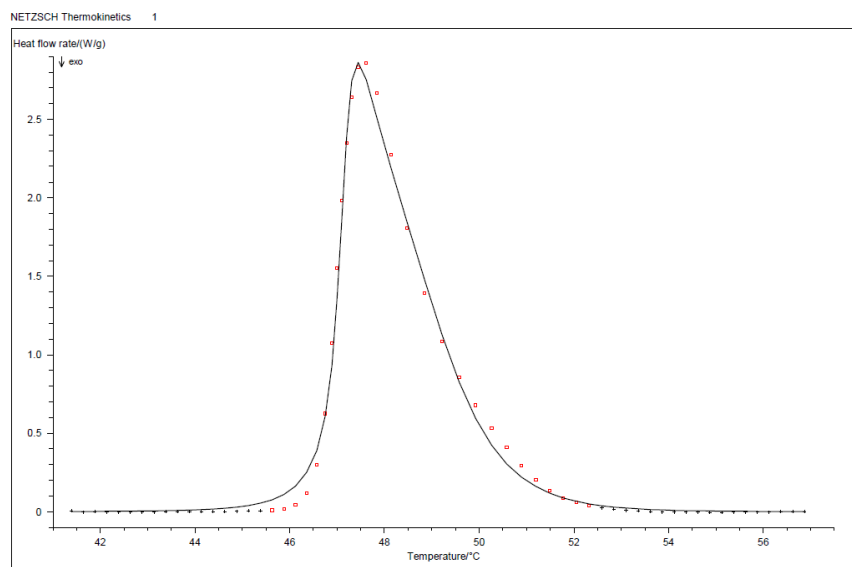

## NETZSCH Thermokinetics

Date/Time: 10.07.2016 at 13:11

Project: 1

Model 1: n-th order with autocatalysis by B

A → 1 → B

Start evaluation: 0.00050

Measurement type: DSC

Fine evaluation: 0.99950

SCAN 1

Identity:

OP320 27.05.2016 10:30:06/Segm.S1/3

Transfer Corr: 204\_F1.kcr

Min. Temp/°C: 41.3865

Min. Time/min: 0.0

Max. Temp/°C: 56.8716

Max. Time/min: 1.7359

Heating rate/(K/min): 8.921

Sampling time/s: 1.680

Sample mass/mg: 3.360

Base line type:

LeftPts: 20

RightPts: 10

## PARAMETERS AND STANDARD DEVIATIONS

| # | Parameter              | Initial Val. | Optimum Val. | Minimum | Maximum | Sign | t*Std.Dev. |
|---|------------------------|--------------|--------------|---------|---------|------|------------|
| 0 | log A1/s <sup>-1</sup> | 257.3350     | 102.6031     |         |         |      | 7.4801E-2  |
| 1 | E1 kJ/mol              | 1594.9076    | 645.5202     |         |         | +    | 0.2797     |
| 2 | React.ord. 1           | 1.2145       | 1.9406       |         |         | +    | 0.1333     |
| 3 | log Kcat 1             | 0.4500       | 2.1765       |         |         |      | 0.1275     |
| 4 | Area 1/(J/g)           | 48.6894      | 48.6894      |         |         |      | constant   |

## STATISTICS

Least squares: 17.21880

Number of cycles: 19

Mean of residues: 0.52279

Max.No of cycles: 50

Correlation coefficient: 0.995851

Rel. precision: 0.001000

Durbin-Watson Value: 0.566

t-critical(0.95;24): 2.055

Durbin-Watson Factor: 1.434

## F-TEST ON FIT-QUALITY

| #  | Code | Fexp  | Fcrit(0.95) | f-act | Type 1 | Type 2 | Type 3 | Type 4 | Type 5 | Type 6 |
|----|------|-------|-------------|-------|--------|--------|--------|--------|--------|--------|
| 0  | s:   | 1.00  | 1.99        | 24    | Cn B   |        |        |        |        |        |
| 1  | s:   | 1.88  | 1.95        | 26    | B1     |        |        |        |        |        |
| 2  | s:   | 2.21  | 1.97        | 25    | C1 B   |        |        |        |        |        |
| 3  | s:   | 2.21  | 1.99        | 24    | Bna    |        |        |        |        |        |
| 4  | s:   | 6.41  | 1.97        | 25    | Fn     |        |        |        |        |        |
| 5  | s:   | 8.69  | 1.97        | 25    | An     |        |        |        |        |        |
| 6  | s:   | 12.00 | 1.95        | 26    | A3     |        |        |        |        |        |
| 7  | s:   | 15.28 | 1.95        | 26    | F2     |        |        |        |        |        |
| 8  | s:   | 26.43 | 1.95        | 26    | F1     |        |        |        |        |        |
| 9  | s:   | 32.71 | 1.95        | 26    | R3     |        |        |        |        |        |
| 10 | s:   | 39.07 | 1.95        | 26    | D1F    |        |        |        |        |        |
| 11 | s:   | 41.36 | 1.95        | 26    | R2     |        |        |        |        |        |
| 12 | s:   | 47.31 | 1.95        | 26    | D3F    |        |        |        |        |        |
| 13 | s:   | 49.03 | 1.95        | 26    | D3     |        |        |        |        |        |
| 14 | s:   | 53.21 | 1.95        | 26    | D4     |        |        |        |        |        |
| 15 | s:   | 56.25 | 1.95        | 26    | D2     |        |        |        |        |        |
| 16 | s:   | 73.48 | 1.95        | 26    | D1     |        |        |        |        |        |
| 17 | s:   | 96.93 | 1.95        | 26    | A2     |        |        |        |        |        |

# Sample 18 / cycle 2 / CnB

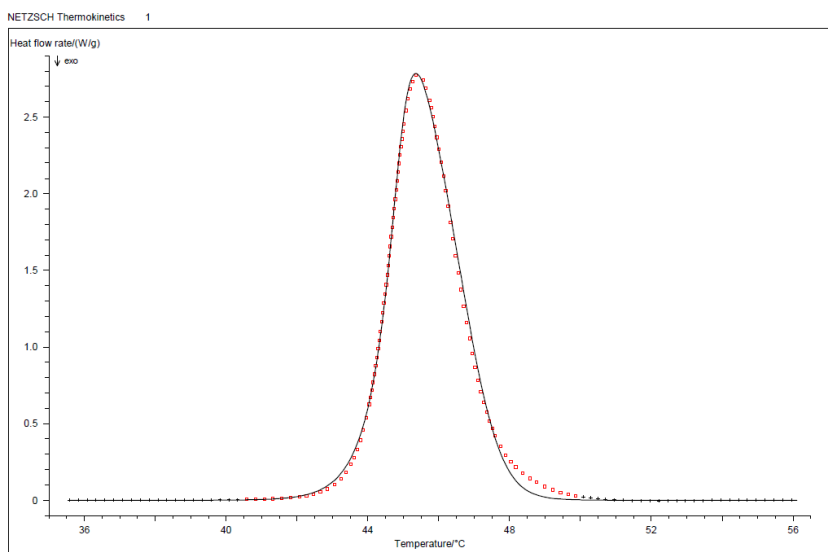

## NETZSCH Thermokinetics

Date/Time: 10.07.2016 at 13:23

Project: 1

Model 1: n-th order with autocatalysis by B

A → 1 → B

Start evaluation: 0.00050

Measurement type: DSC

Fine evaluation: 0.99950

SCAN 1

Identity:

OP320 27.05.2016 11:00:44/Segm.S1/3

Transfer Corr: 204\_F1.kcr

Min. Temp/°C: 35.5835

Min. Time/min: 0.0

Max. Temp/°C: 56.1072

Max. Time/min: 2.2997

Heating rate/(K/min): 8.925

Sampling time/s: 0.336

Sample mass/mg: 3.360

LeftPts: 9

RightPts: 10

## PARAMETERS AND STANDARD DEVIATIONS

| # | Parameter              | Initial Val. | Optimum Val. | Minimum | Maximum | Sign | t*Std.Dev. |
|---|------------------------|--------------|--------------|---------|---------|------|------------|
| 0 | log A1/s <sup>-1</sup> | 197.5139     | 216.8037     |         |         |      | 7.3589E-3  |
| 1 | E1 kJ/mol              | 1211.0123    | 1328.2264    |         |         | +    | 0.1382     |
| 2 | React.ord. 1           | 1.7406       | 1.8283       |         |         | +    | 6.8937E-2  |
| 3 | log Kcat 1             | 0.4500       | 0.4443       |         |         |      | 1.6778E-2  |
| 4 | Area 1/(J/g)           | 52.0572      | 52.0572      |         |         |      | constant   |

## STATISTICS

Least squares: 4.00618

Number of cycles: 21

Mean of residues: 9.86090E-2

Max.No of cycles: 50

Correlation coefficient: 0.999046

Rel. precision: 0.001000

Durbin-Watson Value: 0.015

t-critical(0.95;189): 1.964

Durbin-Watson Factor: 8.060

## F-TEST ON FIT-QUALITY

| #  | Code | Fexp     | Fcrit(0.95) | f-act | Type 1 | Type 2 | Type 3 | Type 4 | Type 5 | Type 6 |
|----|------|----------|-------------|-------|--------|--------|--------|--------|--------|--------|
| 0  | s:   | 1.00     | 1.27        | 189   | Cn B   |        |        |        |        |        |
| 1  | s:   | 2.85     | 1.27        | 190   | C1 B   |        |        |        |        |        |
| 2  | s:   | 3.72     | 1.27        | 191   | F2     |        |        |        |        |        |
| 3  | s:   | 3.74     | 1.27        | 190   | Fn     |        |        |        |        |        |
| 4  | s:   | 4.19     | 1.27        | 191   | B1     |        |        |        |        |        |
| 5  | s:   | 5.28     | 1.27        | 190   | An     |        |        |        |        |        |
| 6  | s:   | 5.66     | 1.27        | 191   | A3     |        |        |        |        |        |
| 7  | s:   | 7.60     | 1.27        | 191   | A2     |        |        |        |        |        |
| 8  | s:   | 18.00    | 1.27        | 191   | F1     |        |        |        |        |        |
| 9  | s:   | 37.75    | 1.27        | 191   | R3     |        |        |        |        |        |
| 10 | s:   | 48.12    | 1.27        | 191   | D1F    |        |        |        |        |        |
| 11 | s:   | 53.95    | 1.27        | 191   | R2     |        |        |        |        |        |
| 12 | s:   | 58.23    | 1.27        | 191   | D3F    |        |        |        |        |        |
| 13 | s:   | 63.93    | 1.27        | 191   | D3     |        |        |        |        |        |
| 14 | s:   | 95.93    | 1.27        | 191   | D4     |        |        |        |        |        |
| 15 | s:   | 122.38   | 1.27        | 191   | D2     |        |        |        |        |        |
| 16 | s:   | 178.08   | 1.27        | 191   | D1     |        |        |        |        |        |
| 17 | s:   | 11326.85 | 1.27        | 189   | Bna    |        |        |        |        |        |

# Sample 18 / cycle 3 / CnB

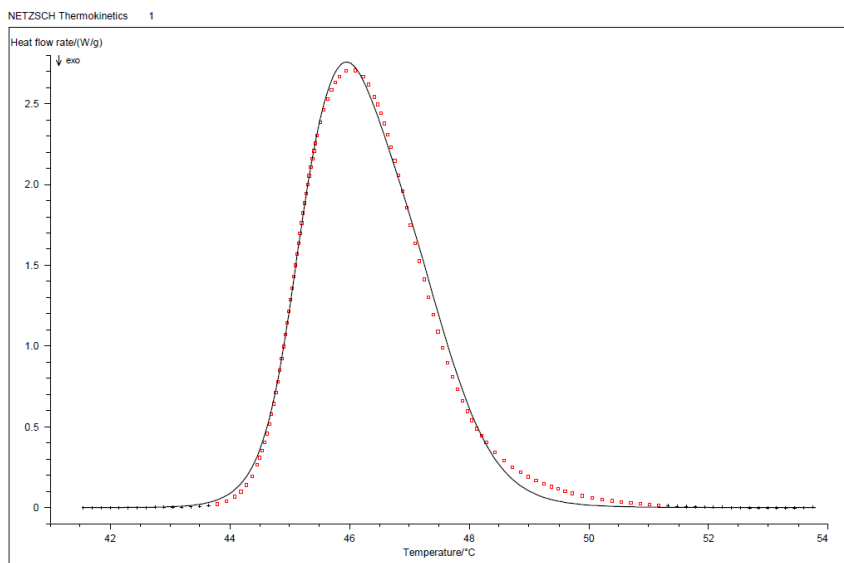

## NETZSCH Thermokinetics

Date/Time: 10.07.2016 at 13:39

Project: 1

Model 1: n-th order with autocatalysis by B

A—1→B

Start evaluation: 0.00050

Measurement type: DSC

Fine evaluation: 0.99950

SCAN 1

Identity:

OP320 30.05.2016 11:22:18/Segm.S1/3

Transfer Corr: 204\_F1.kcr

Min. Temp/°C: 41.5527

Min. Time/min: 0.0

Max. Temp/°C: 53.7886

Max. Time/min: 1.3727

Heating rate/(K/min): 8.914

Sampling time/s: 0.336

Sample mass/mg: 3.360

LeftPts: 20

RightPts: 20

## PARAMETERS AND STANDARD DEVIATIONS

| # | Parameter              | Initial Val. | Optimum Val. | Minimum | Maximum | Sign | t*Std.Dev. |
|---|------------------------|--------------|--------------|---------|---------|------|------------|
| 0 | log A1/s <sup>-1</sup> | 82.0888      | 397.8131     |         |         |      | 122.9451   |
| 1 | E1 kJ/mol              | 509.6797     | 2432.2384    |         |         | +    | 3.2639E-2  |
| 2 | React.ord. 1           | 1.0698       | 2.7541       |         |         | +    | 16.4516    |
| 3 | log Kcat 1             | 0.4500       | -4.0000      |         |         |      | constant   |
| 4 | Area 1/(J/g)           | 52.1588      | 52.1588      |         |         |      | constant   |

## STATISTICS

Least squares: 7.73456

Number of cycles: 11

Mean of residues: 0.17732

Max.No of cycles: 50

Correlation coefficient: 0.998718

Rel. precision: 0.001000

Durbin-Watson Value: 0.021

t-critical(0.95;148): 1.967

Durbin-Watson Factor: 6.917

## F-TEST ON FIT-QUALITY

| #  | Code | Fexp   | Fcrit(0.95) | f-act | Type 1 | Type 2 | Type 3 | Type 4 | Type 5 | Type 6 |
|----|------|--------|-------------|-------|--------|--------|--------|--------|--------|--------|
| 0  | s:   | 1.00   | 1.31        | 148   | Cn B   |        |        |        |        |        |
| 1  | s:   | 3.22   | 1.31        | 150   | F2     |        |        |        |        |        |
| 2  | s:   | 4.81   | 1.31        | 149   | An     |        |        |        |        |        |
| 3  | s:   | 6.53   | 1.31        | 149   | C1 B   |        |        |        |        |        |
| 4  | s:   | 6.89   | 1.31        | 150   | A3     |        |        |        |        |        |
| 5  | s:   | 10.35  | 1.31        | 150   | A2     |        |        |        |        |        |
| 6  | s:   | 23.26  | 1.31        | 150   | F1     |        |        |        |        |        |
| 7  | s:   | 42.27  | 1.31        | 150   | R3     |        |        |        |        |        |
| 8  | s:   | 44.62  | 1.31        | 150   | B1     |        |        |        |        |        |
| 9  | s:   | 55.86  | 1.31        | 150   | D1F    |        |        |        |        |        |
| 10 | s:   | 56.54  | 1.31        | 150   | R2     |        |        |        |        |        |
| 11 | s:   | 65.22  | 1.31        | 150   | D3F    |        |        |        |        |        |
| 12 | s:   | 69.44  | 1.31        | 150   | D3     |        |        |        |        |        |
| 13 | s:   | 96.68  | 1.31        | 150   | D4     |        |        |        |        |        |
| 14 | s:   | 121.40 | 1.31        | 150   | D2     |        |        |        |        |        |
| 15 | s:   | 160.19 | 1.31        | 150   | D1     |        |        |        |        |        |
| 16 | s:   | 160.19 | 1.31        | 150   | D1     |        |        |        |        |        |
| 17 | s:   | 160.19 | 1.31        | 150   | D1     |        |        |        |        |        |

# Sample 19 / cycle 1 / CnB

NETZSCH Thermokinetics 1

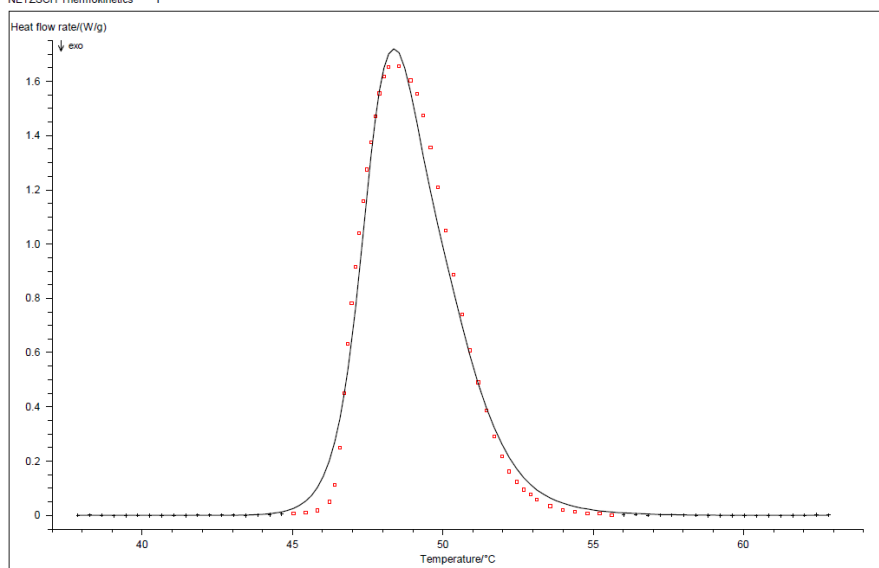

NETZSCH Thermokinetics

Date/Time: 04.10.2016 at 14:36

Project: 1

Model 1: n-th order with autocatalysis by B

A → B

Start evaluation: 0.00050

Measurement type: DSC

Fine evaluation: 0.99950

SCAN 1

Identity:

OP320 14.04.2016 13:48:15/Segm.S1/3

Transfer Corr: 204\_F1.kcr

Min. Temp/°C: 37.8548

Min. Time/min: 0.0

Max. Temp/°C: 62.8357

Max. Time/min: 2.7966

Heating rate/(K/min): 8.933

Sampling time/s: 1.342

Sample mass/mg: 4.660

Base line type: tangent area prop.

LeftPts: 25

RightPts: 25

## PARAMETERS AND STANDARD DEVIATIONS

| # | Parameter              | Initial Val. | Optimum Val. | Minimum | Maximum | Sign | t*Std.Dev. |
|---|------------------------|--------------|--------------|---------|---------|------|------------|
| 0 | log A1/s <sup>-1</sup> | 41.5030      | 236.0575     |         |         |      | 0.5910     |
| 1 | E1 kJ/mol              | 264.6496     | 1457.4773    |         |         | +    | 5.2821     |
| 2 | React.ord. 1           | 1.0837       | 3.3292       |         |         | +    | 0.3867     |
| 3 | log Kcat 1             | 0.4500       | 0.2742       |         |         |      | 0.9697     |
| 4 | Area 1/(J/g)           | 43.0038      | 43.0038      |         |         |      | constant   |

## STATISTICS

|                          |          |                      |          |
|--------------------------|----------|----------------------|----------|
| Least squares:           | 11.70089 | Number of cycles:    | 50       |
| Mean of residues:        | 0.30474  | Max.No of cycles:    | 50       |
| Correlation coefficient: | 0.992816 | Rel. precision:      | 0.001000 |
| Durbin-Watson Value:     | 0.164    | t-critical(0.95;51): | 1.998    |
| Durbin-Watson Factor:    | 2.519    |                      |          |

## F-TEST ON FIT-QUALITY

| #  | Code | Fexp   | Fcrit(0.95) | f-act | Type 1 | Type 2 | Type 3 | Type 4 | Type 5 | Type 6 |
|----|------|--------|-------------|-------|--------|--------|--------|--------|--------|--------|
| 0  | s:   | 1.00   | 1.59        | 52    | Fn     |        |        |        |        |        |
| 1  | s:   | 2.03   | 1.59        | 51    | Cn B   |        |        |        |        |        |
| 2  | s:   | 3.00   | 1.58        | 53    | B1     |        |        |        |        |        |
| 3  | s:   | 3.33   | 1.58        | 53    | F2     |        |        |        |        |        |
| 4  | s:   | 3.52   | 1.59        | 52    | C1 B   |        |        |        |        |        |
| 5  | s:   | 6.64   | 1.59        | 52    | An     |        |        |        |        |        |
| 6  | s:   | 8.45   | 1.58        | 53    | A2     |        |        |        |        |        |
| 7  | s:   | 12.62  | 1.58        | 53    | F1     |        |        |        |        |        |
| 8  | s:   | 20.36  | 1.58        | 53    | R3     |        |        |        |        |        |
| 9  | s:   | 24.62  | 1.58        | 53    | D1F    |        |        |        |        |        |
| 10 | s:   | 25.64  | 1.58        | 53    | R2     |        |        |        |        |        |
| 11 | s:   | 27.01  | 1.58        | 53    | D3F    |        |        |        |        |        |
| 12 | s:   | 27.83  | 1.58        | 53    | D3     |        |        |        |        |        |
| 13 | s:   | 36.87  | 1.58        | 53    | D4     |        |        |        |        |        |
| 14 | s:   | 42.39  | 1.58        | 53    | D2     |        |        |        |        |        |
| 15 | s:   | 42.70  | 1.59        | 51    | Bna    |        |        |        |        |        |
| 16 | s:   | 59.45  | 1.58        | 53    | D1     |        |        |        |        |        |
| 17 | s:   | 255.25 | 1.58        | 53    | A3     |        |        |        |        |        |

# Sample 19 / cycle 2 / CnB

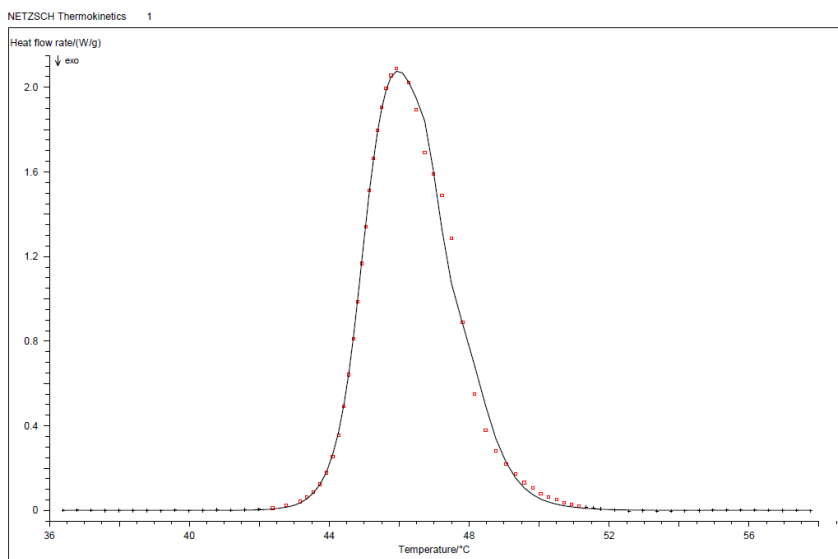

## NETZSCH Thermokinetics

Date/Time: 04.10.2016 at 14:34

Project: 1

Model 1: n-th order with autocatalysis by B

A → 1 → B

Start evaluation: 0.00050

Measurement type: DSC

Fine evaluation: 0.99950

SCAN 1

Identity:

OP320 14.04.2016 15:04:45/Segm.S1/3

Transfer Corr: 204\_F1.kcr

Min. Temp/°C: 36.3948

Min. Time/min: 0.0

Max. Temp/°C: 57.7620

Max. Time/min: 2.3946

Heating rate/(K/min): 8.923

Sampling time/s: 1.343

Sample mass/mg: 4.660

Base line type: tangent area prop.

LeftPts: 25

RightPts: 25

## PARAMETERS AND STANDARD DEVIATIONS

| # | Parameter              | Initial Val. | Optimum Val. | Minimum | Maximum | Sign | t*Std.Dev. |
|---|------------------------|--------------|--------------|---------|---------|------|------------|
| 0 | log A1/s <sup>-1</sup> | 196.3712     | 296.7796     |         |         |      | 0.3380     |
| 1 | E1 kJ/mol              | 1205.5300    | 1816.0537    |         |         | +    | 3.0440     |
| 2 | React.ord. 1           | 2.3392       | 2.8237       |         |         | +    | 0.3658     |
| 3 | log Kcat 1             | 0.4500       | -0.2593      |         |         |      | 1.6076     |
| 4 | Area 1/(J/g)           | 46.6629      | 46.6629      |         |         |      | constant   |

## STATISTICS

Least squares: 6.17527

Number of cycles: 22

Mean of residues: 0.23912

Max.No of cycles: 50

Correlation coefficient: 0.997335

Rel. precision: 0.001000

Durbin-Watson Value: 0.981

t-critical(0.95;41): 2.010

Durbin-Watson Factor: 1.162

## F-TEST ON FIT-QUALITY

| #  | Code | Fexp   | Fcrit(0.95) | f-act | Type 1 | Type 2 | Type 3 | Type 4 | Type 5 | Type 6 |
|----|------|--------|-------------|-------|--------|--------|--------|--------|--------|--------|
| 0  | s:   | 1.00   | 1.69        | 41    | Cn B   |        |        |        |        |        |
| 1  | s:   | 1.02   | 1.68        | 42    | Fn     |        |        |        |        |        |
| 2  | s:   | 2.29   | 1.67        | 43    | F2     |        |        |        |        |        |
| 3  | s:   | 2.83   | 1.67        | 43    | B1     |        |        |        |        |        |
| 4  | s:   | 2.86   | 1.68        | 42    | C1 B   |        |        |        |        |        |
| 5  | s:   | 4.28   | 1.68        | 42    | An     |        |        |        |        |        |
| 6  | s:   | 4.68   | 1.67        | 43    | A3     |        |        |        |        |        |
| 7  | s:   | 5.94   | 1.67        | 43    | A2     |        |        |        |        |        |
| 8  | s:   | 12.26  | 1.67        | 43    | F1     |        |        |        |        |        |
| 9  | s:   | 21.64  | 1.67        | 43    | R3     |        |        |        |        |        |
| 10 | s:   | 28.77  | 1.67        | 43    | R2     |        |        |        |        |        |
| 11 | s:   | 29.66  | 1.67        | 43    | D1F    |        |        |        |        |        |
| 12 | s:   | 34.65  | 1.67        | 43    | D3F    |        |        |        |        |        |
| 13 | s:   | 36.13  | 1.67        | 43    | D3     |        |        |        |        |        |
| 14 | s:   | 51.22  | 1.67        | 43    | D4     |        |        |        |        |        |
| 15 | s:   | 57.06  | 1.67        | 43    | D2     |        |        |        |        |        |
| 16 | s:   | 82.57  | 1.67        | 43    | D1     |        |        |        |        |        |
| 17 | s:   | 399.97 | 1.69        | 41    | Bna    |        |        |        |        |        |

## NETZSCH Thermokinetics

Date/Time: 04.10.2016 at 14:18

Project: 1

Model 1: n-th order with autocatalysis by B

A → 1 → B

Start evaluation: 0.00050

Measurement type: DSC

Fine evaluation: 0.99950

SCAN 1 Identity: 204\_F1.kcr OP320 14.04.2016 16:11:03/Segm.S1/3

Transfer Corr: 34.8614

Min. Time/min: 0.0

Min. Temp/°C: 59.5753

Max. Time/min: 2.7683

Max. Temp/°C: 8.927

Sampling time/s: 1.678

Heating rate/(K/min): 4.660

Sample mass/mg: tangent area prop.

LeftPts: 25 RightPts: 25

## PARAMETERS AND STANDARD DEVIATIONS

| # | Parameter              | Initial Val. | Optimum Val. | Minimum | Maximum | Sign | t*Std.Dev. |
|---|------------------------|--------------|--------------|---------|---------|------|------------|
| 0 | log A1/s <sup>-1</sup> | 169.7908     | 301.4746     |         |         |      | 173.0669   |
| 1 | E1 kJ/mol              | 1043.6406    | 1844.3835    |         |         | +    | 0.3586     |
| 2 | React.ord. 1           | 2.1842       | 2.7850       |         |         | +    | 18.8609    |
| 3 | log Kcat 1             | 0.4500       | -4.0000      |         |         |      | constant   |
| 4 | Area 1/(J/g)           | 46.6244      | 46.6244      |         |         |      | constant   |

## STATISTICS

Least squares: 6.78102 Number of cycles: 40

Mean of residues: 0.26040 Max.No of cycles: 50

Correlation coefficient: 0.996266 Rel. precision: 0.001000

Durbin-Watson Value: 1.206 t-critical(0.95;30): 2.033

Durbin-Watson Factor: 1.089

## F-TEST ON FIT-QUALITY

| #  | Code | Fexp   | Fcrit(0.95) | f-act | Type 1 | Type 2 | Type 3 | Type 4 | Type 5 | Type 6 |
|----|------|--------|-------------|-------|--------|--------|--------|--------|--------|--------|
| 0  | s:   | 1.00   | 1.83        | 31    | Fn     |        |        |        |        |        |
| 1  | s:   | 1.01   | 1.58        | 93    | A3     |        |        |        |        |        |
| 2  | s:   | 1.03   | 1.84        | 30    | Cn B   |        |        |        |        |        |
| 3  | s:   | 1.82   | 1.82        | 32    | F2     |        |        |        |        |        |
| 4  | s:   | 2.45   | 1.83        | 31    | C1 B   |        |        |        |        |        |
| 5  | s:   | 2.51   | 1.82        | 32    | B1     |        |        |        |        |        |
| 6  | s:   | 3.57   | 1.83        | 31    | An     |        |        |        |        |        |
| 7  | s:   | 4.50   | 1.82        | 32    | A2     |        |        |        |        |        |
| 8  | s:   | 8.99   | 1.82        | 32    | F1     |        |        |        |        |        |
| 9  | s:   | 15.75  | 1.82        | 32    | R3     |        |        |        |        |        |
| 10 | s:   | 20.27  | 1.82        | 32    | R2     |        |        |        |        |        |
| 11 | s:   | 21.55  | 1.82        | 32    | D1F    |        |        |        |        |        |
| 12 | s:   | 25.03  | 1.82        | 32    | D3F    |        |        |        |        |        |
| 13 | s:   | 25.63  | 1.82        | 32    | D3     |        |        |        |        |        |
| 14 | s:   | 34.34  | 1.82        | 32    | D4     |        |        |        |        |        |
| 15 | s:   | 40.37  | 1.82        | 32    | D2     |        |        |        |        |        |
| 16 | s:   | 61.36  | 1.82        | 32    | D1     |        |        |        |        |        |
| 17 | s:   | 279.61 | 1.84        | 30    | Bna    |        |        |        |        |        |

# Sample 10 / cycle 3 / Fn

NETZSCH Thermokinetics 1

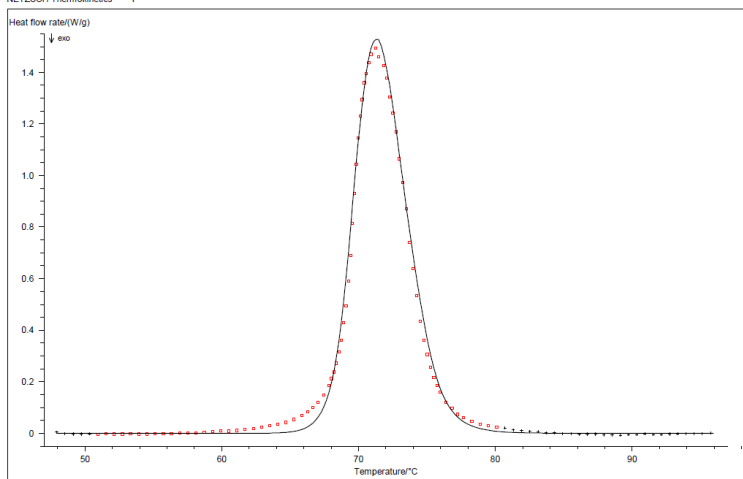

## NETZSCH Thermokinetics

Date/Time: 30.11.2016 at 12:32

Project: 1  
Model 1: n-th order

A—1→B

Start evaluation: 0.00050  
Fine evaluation: 0.99950  
SCAN 1 Identity:  
Transfer Corr: 204 F1.kcr  
Min. Temp/°C: 47.9367  
Max. Temp/°C: 95.9370  
Heating rate/(K/min): 8.952  
Sample mass/mg: 4.960  
Base line type:

Measurement type: DSC  
OP 320 10.11.2015 12:52:35/Segm.S1/1  
Min. Time/min: 0.0  
Max. Time/min: 5.3622  
Sampling time/s: 1.341  
LeftPts: 80 RightPts: 80

## PARAMETERS AND STANDARD DEVIATIONS

| # | Parameter              | Initial Val. | Optimum Val. | Minimum | Maximum | Sign | t*Std.Dev. |
|---|------------------------|--------------|--------------|---------|---------|------|------------|
| 0 | log A1/s <sup>-1</sup> | 177.9284     | 176.7113     |         |         |      | 0.4344     |
| 1 | E1 kJ/mol              | 1177.3919    | 1169.7892    |         |         | +    | 2.8894     |
| 2 | React.ord. 1           | 2.7923       | 2.6705       |         |         | +    | 7.5347E-2  |
| 3 | Area 1/(J/g)           | 51.0687      | 51.0687      |         |         |      | constant   |

## STATISTICS

Least squares: 3.20546 Number of cycles: 11  
Mean of residues: 0.11533 Max.No of cycles: 50  
Correlation coefficient: 0.997243 Rel. precision: 0.001000  
Durbin-Watson Value: 0.090 t-critical(0.95;146): 1.967  
Durbin-Watson Factor: 3.378

## F-TEST ON FIT-QUALITY

| #  | Code | Fexp  | Fcrit(0.95) | f-act | Type 1 | Type 2 | Type 3 | Type 4 | Type 5 | Type 6 |
|----|------|-------|-------------|-------|--------|--------|--------|--------|--------|--------|
| 0  | s:   | 1.00  | 1.32        | 145   | Cn B   |        |        |        |        |        |
| 1  | s:   | 1.06  | 1.32        | 147   | B1     |        |        |        |        |        |
| 2  | s:   | 1.25  | 1.32        | 146   | C1 B   |        |        |        |        |        |
| 3  | s:   | 1.38  | 1.32        | 146   | Fn     |        |        |        |        |        |
| 4  | s:   | 2.11  | 1.32        | 147   | F2     |        |        |        |        |        |
| 5  | s:   | 6.15  | 1.32        | 146   | An     |        |        |        |        |        |
| 6  | s:   | 7.09  | 1.32        | 147   | A2     |        |        |        |        |        |
| 7  | s:   | 10.28 | 1.32        | 147   | F1     |        |        |        |        |        |
| 8  | s:   | 18.86 | 1.32        | 147   | R3     |        |        |        |        |        |
| 9  | s:   | 21.59 | 1.32        | 147   | D1F    |        |        |        |        |        |
| 10 | s:   | 24.29 | 1.32        | 147   | D3F    |        |        |        |        |        |
| 11 | s:   | 25.29 | 1.32        | 147   | D3     |        |        |        |        |        |
| 12 | s:   | 26.23 | 1.32        | 147   | R2     |        |        |        |        |        |
| 13 | s:   | 38.04 | 1.32        | 147   | D4     |        |        |        |        |        |
| 14 | s:   | 50.51 | 1.32        | 147   | D2     |        |        |        |        |        |
| 15 | s:   | 76.55 | 1.32        | 147   | D1     |        |        |        |        |        |
| 16 | s:   | 96.86 | 1.32        | 147   | A3     |        |        |        |        |        |

Sample 10 / cycle 4 / Fn

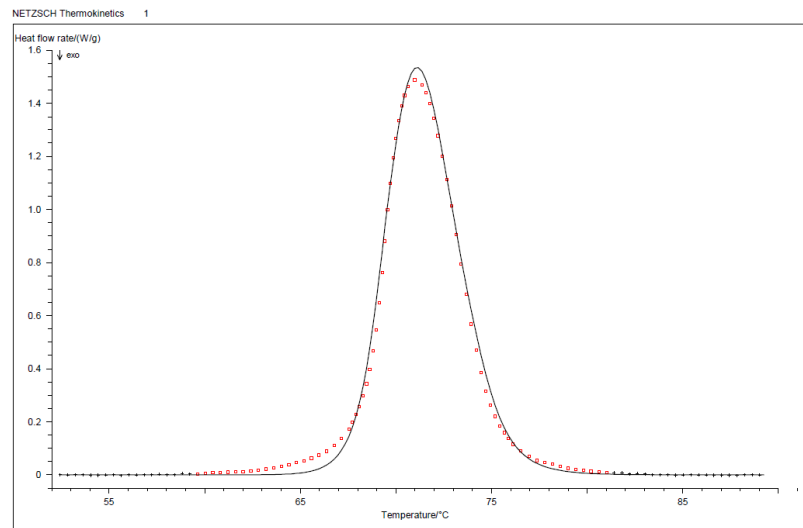

NETZSCH Thermokinetics  
Project: 1  
Model 1: n-th order  
Date/Time: 30.11.2016 at 12:39  
A-1→B  
Start evaluation: 0.00050  
Fine evaluation: 0.99950  
Measurement type: DSC  
SCAN 1 Identity: 204\_F1.kcr OP 320 10.11.2015 13:42:51/Segm.S1/1  
Transfer Corr: 0.00050  
Min. Temp/°C: 52.4361  
Max. Temp/°C: 89.2324  
Heating rate/(K/min): 8.955  
Sample mass/mg: 4.960  
Base line type: LeftPts: 40 RightPts: 40  
Min. Time/min: 0.0  
Max. Time/min: 4.1090  
Sampling time/s: 1.340

PARAMETERS AND STANDARD DEVIATIONS

| # | Parameter              | Initial Val. | Optimum Val. | Minimum | Maximum | Sign | t*Std.Dev. |
|---|------------------------|--------------|--------------|---------|---------|------|------------|
| 0 | log A1/s <sup>-1</sup> | 175.2464     | 175.2460     |         |         |      | 3.1265E-2  |
| 1 | E1 kJ/mol              | 1159.4749    | 1159.4718    |         |         | +    | 0.2569     |
| 2 | React.ord. 1           | 2.6002       | 2.6002       |         |         | +    | 9.2144E-2  |
| 3 | Area 1/(J/g)           | 50.7802      | 50.7802      |         |         |      | constant   |

STATISTICS  
Least squares: 3.54625  
Mean of residues: 0.13845  
Correlation coefficient: 0.997356  
Durbin-Watson Value: 0.068  
Durbin-Watson Factor: 3.872  
Number of cycles: 4  
Max.No of cycles: 50  
Rel. precision: 0.001000  
t-critical(0.95;106): 1.974

F-TEST ON FIT-QUALITY

| #  | Code | Fexp  | Fcrit(0.95) | f-act | Type 1 | Type 2 | Type 3 | Type 4 | Type 5 | Type 6 |
|----|------|-------|-------------|-------|--------|--------|--------|--------|--------|--------|
| 0  | s:   | 1.00  | 1.38        | 107   | B1     |        |        |        |        |        |
| 1  | s:   | 1.03  | 1.38        | 105   | Cn B   |        |        |        |        |        |
| 2  | s:   | 1.15  | 1.38        | 106   | C1 B   |        |        |        |        |        |
| 3  | s:   | 1.31  | 1.38        | 106   | Fn     |        |        |        |        |        |
| 4  | s:   | 2.00  | 1.38        | 107   | F2     |        |        |        |        |        |
| 5  | s:   | 6.14  | 1.38        | 106   | An     |        |        |        |        |        |
| 6  | s:   | 7.45  | 1.38        | 107   | A2     |        |        |        |        |        |
| 7  | s:   | 11.00 | 1.38        | 107   | F1     |        |        |        |        |        |
| 8  | s:   | 20.65 | 1.38        | 107   | R3     |        |        |        |        |        |
| 9  | s:   | 23.94 | 1.38        | 107   | D1F    |        |        |        |        |        |
| 10 | s:   | 26.81 | 1.38        | 107   | D3F    |        |        |        |        |        |
| 11 | s:   | 27.91 | 1.38        | 107   | D3     |        |        |        |        |        |
| 12 | s:   | 28.55 | 1.38        | 107   | R2     |        |        |        |        |        |
| 13 | s:   | 41.03 | 1.38        | 107   | D4     |        |        |        |        |        |
| 14 | s:   | 54.44 | 1.38        | 107   | D2     |        |        |        |        |        |
| 15 | s:   | 80.83 | 1.38        | 107   | D1     |        |        |        |        |        |
| 16 | s:   | 91.57 | 1.38        | 107   | A3     |        |        |        |        |        |

# Sample 10 / cycle 5 / Fn

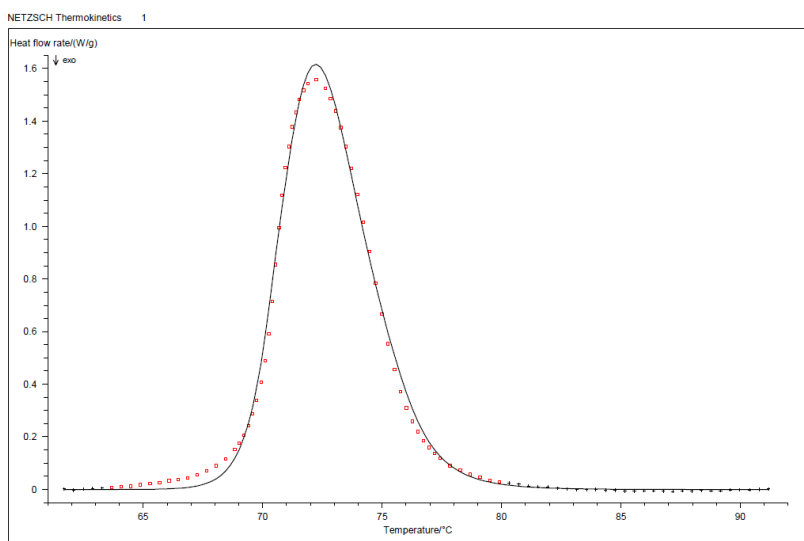

## NETZSCH Thermokinetics

Date/Time: 30.11.2016 at 12:45

Project: 1

Model 1: n-th order

A—1→B

Start evaluation: 0.00050

Measurement type: DSC

Fine evaluation: 0.99950

SCAN 1

Identity:

OP 320 13.11.2015 11:11:38/Segm.S1/1

Transfer Corr: 204 F1.kcr

Min. Temp/°C: 61.6857

Min. Time/min: 0.0

Max. Temp/°C: 91.1796

Max. Time/min: 3.2833

Heating rate/(K/min): 8.983

Sampling time/s: 1.340

Sample mass/mg: 4.880

Base line type:

LeftPts: 20

RightPts: 40

## PARAMETERS AND STANDARD DEVIATIONS

| # | Parameter              | Initial Val. | Optimum Val. | Minimum | Maximum | Sign | t*Std.Dev. |
|---|------------------------|--------------|--------------|---------|---------|------|------------|
| 0 | log A1/s <sup>-1</sup> | 155.6530     | 205.2837     |         |         |      | 2.2675E-2  |
| 1 | E1 kJ/mol              | 1034.3960    | 1361.2047    |         |         | +    | 0.2673     |
| 2 | React.ord. 1           | 2.3412       | 3.0575       |         |         | +    | 0.1436     |
| 3 | Area 1/(J/g)           | 51.7808      | 51.7808      |         |         |      | constant   |

## STATISTICS

Least squares: 3.66961

Number of cycles: 21

Mean of residues: 0.15746

Max.No of cycles: 50

Correlation coefficient: 0.997701

Rel. precision: 0.001000

Durbin-Watson Value: 0.127

t-critical(0.95;79): 1.981

Durbin-Watson Factor: 2.854

## F-TEST ON FIT-QUALITY

| #  | Code | Fexp  | Fcrit(0.95) | f-act | Type 1 | Type 2 | Type 3 | Type 4 | Type 5 | Type 6 |
|----|------|-------|-------------|-------|--------|--------|--------|--------|--------|--------|
| 0  | s:   | 1.00  | 1.45        | 79    | Fn     |        |        |        |        |        |
| 1  | s:   | 1.01  | 1.46        | 78    | Cn B   |        |        |        |        |        |
| 2  | s:   | 1.66  | 1.45        | 79    | C1 B   |        |        |        |        |        |
| 3  | s:   | 1.66  | 1.45        | 80    | B1     |        |        |        |        |        |
| 4  | s:   | 2.73  | 1.45        | 80    | F2     |        |        |        |        |        |
| 5  | s:   | 4.76  | 1.45        | 79    | An     |        |        |        |        |        |
| 6  | s:   | 9.03  | 1.45        | 80    | A2     |        |        |        |        |        |
| 7  | s:   | 13.77 | 1.45        | 80    | F1     |        |        |        |        |        |
| 8  | s:   | 24.37 | 1.45        | 80    | R3     |        |        |        |        |        |
| 9  | s:   | 29.12 | 1.45        | 80    | D1F    |        |        |        |        |        |
| 10 | s:   | 31.83 | 1.45        | 80    | D3F    |        |        |        |        |        |
| 11 | s:   | 32.35 | 1.45        | 80    | R2     |        |        |        |        |        |
| 12 | s:   | 32.79 | 1.45        | 80    | D3     |        |        |        |        |        |
| 13 | s:   | 46.47 | 1.45        | 80    | D4     |        |        |        |        |        |
| 14 | s:   | 47.59 | 1.45        | 80    | A3     |        |        |        |        |        |
| 15 | s:   | 59.28 | 1.45        | 80    | D2     |        |        |        |        |        |
| 16 | s:   | 87.05 | 1.45        | 80    | D1     |        |        |        |        |        |

Sample 10 / cycle 6 / Fn

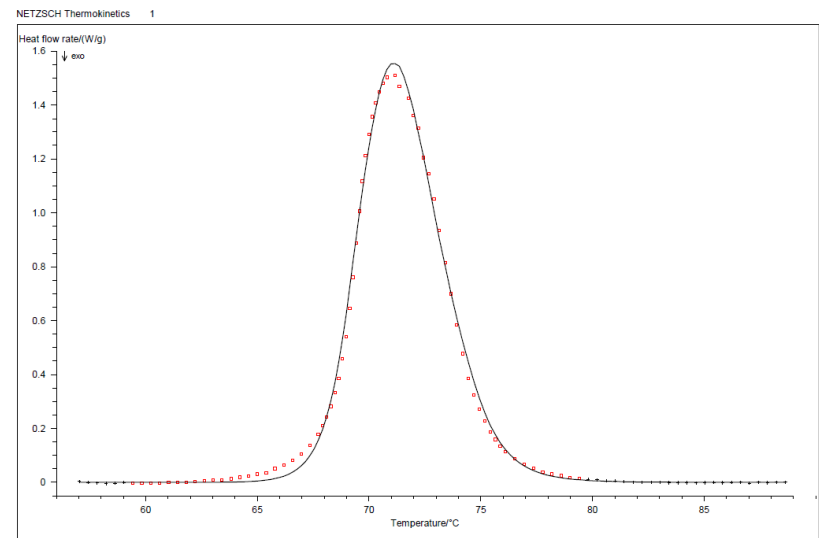

NETZSCH Thermokinetics Date/Time: 30.11.2016 at 12:48  
Project: 1  
Model 1: n-th order A—1→B  
Start evaluation: 0.00050 Measurement type: DSC  
Fine evaluation: 0.99950  
SCAN 1 Identity: OP 320 13.11.2015 11:42:50/Segm.S1/1  
Transfer Corr: 204 F1.kcr  
Min. Temp/°C: 57.0308 Min. Time/min: 0.0  
Max. Temp/°C: 88.6342 Max. Time/min: 3.5286  
Heating rate/(K/min): 8.956 Sampling time/s: 1.340  
Sample mass/mg: 4.880  
Base line type: LeftPts: 40 RightPts: 40

PARAMETERS AND STANDARD DEVIATIONS

| # | Parameter              | Initial Val. | Optimum Val. | Minimum | Maximum | Sign | t*Std.Dev. |
|---|------------------------|--------------|--------------|---------|---------|------|------------|
| 0 | log A1/s <sup>-1</sup> | 155.6719     | 184.8069     |         |         |      | 9.3586E-2  |
| 1 | E1 kJ/mol              | 1030.9880    | 1222.2482    |         |         | +    | 0.6458     |
| 2 | React.ord. 1           | 2.3271       | 2.7066       |         |         | +    | 7.0618E-2  |
| 3 | Area 1/(J/g)           | 50.1975      | 50.1975      |         |         |      | constant   |

STATISTICS

Least squares: 2.76174 Number of cycles: 22  
Mean of residues: 0.13179 Max.No of cycles: 50  
Correlation coefficient: 0.998270 Rel. precision: 0.001000  
Durbin-Watson Value: 0.177 t-critical(0.95;100): 1.975  
Durbin-Watson Factor: 2.429

F-TEST ON FIT-QUALITY

| #  | Code | Fexp  | Fcrit(0.95) | f-act | Type 1 | Type 2 | Type 3 | Type 4 | Type 5 | Type 6 |
|----|------|-------|-------------|-------|--------|--------|--------|--------|--------|--------|
| 0  | s:   | 1.00  | 1.39        | 100   | Fn     |        |        |        |        |        |
| 1  | s:   | 1.01  | 1.40        | 99    | Cn B   |        |        |        |        |        |
| 2  | s:   | 1.36  | 1.39        | 101   | B1     |        |        |        |        |        |
| 3  | s:   | 1.46  | 1.39        | 100   | C1 B   |        |        |        |        |        |
| 4  | s:   | 2.09  | 1.39        | 101   | F2     |        |        |        |        |        |
| 5  | s:   | 6.73  | 1.39        | 100   | An     |        |        |        |        |        |
| 6  | s:   | 9.11  | 1.39        | 101   | A2     |        |        |        |        |        |
| 7  | s:   | 13.49 | 1.39        | 101   | F1     |        |        |        |        |        |
| 8  | s:   | 25.28 | 1.39        | 101   | R3     |        |        |        |        |        |
| 9  | s:   | 30.45 | 1.39        | 101   | D1F    |        |        |        |        |        |
| 10 | s:   | 33.08 | 1.39        | 101   | D3F    |        |        |        |        |        |
| 11 | s:   | 34.00 | 1.39        | 101   | D3     |        |        |        |        |        |
| 12 | s:   | 34.93 | 1.39        | 101   | R2     |        |        |        |        |        |
| 13 | s:   | 49.62 | 1.39        | 101   | A3     |        |        |        |        |        |
| 14 | s:   | 49.66 | 1.39        | 101   | D4     |        |        |        |        |        |
| 15 | s:   | 65.36 | 1.39        | 101   | D2     |        |        |        |        |        |
| 16 | s:   | 98.69 | 1.39        | 101   | D1     |        |        |        |        |        |

# Sample 10 / cycle 7 / Fn

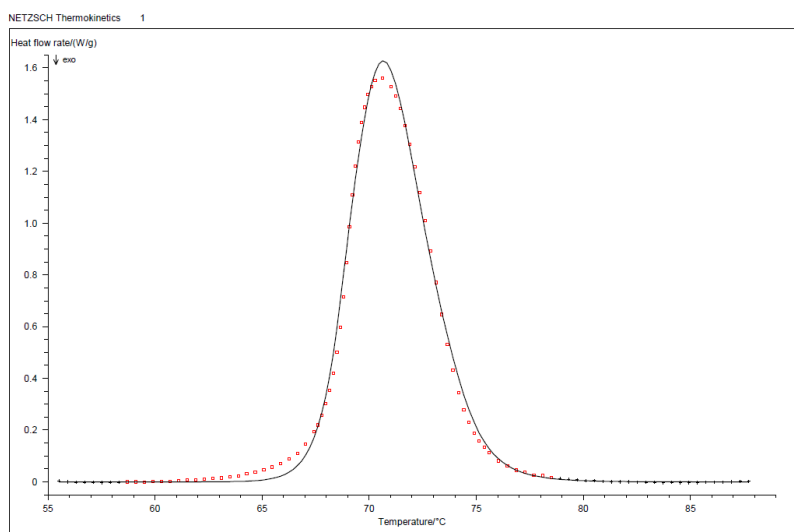

## NETZSCH Thermokinetics

Date/Time: 30.11.2016 at 12:51

Project: 1

Model 1: n-th order

A—1→B

Start evaluation: 0.00050

Measurement type: DSC

Fine evaluation: 0.99950

SCAN 1

Identity:

OP 320 16.11.2015 12:05:47/Segm.S1/1

Transfer Corr: 204 F1.kcr

Min. Temp/°C: 55.5185

Min. Time/min: 0.0

Max. Temp/°C: 87.7296

Max. Time/min: 3.5961

Heating rate/(K/min): 8.957

Sampling time/s: 1.340

Sample mass/mg: 4.830

LeftPts: 40

RightPts: 40

## PARAMETERS AND STANDARD DEVIATIONS

| # | Parameter              | Initial Val. | Optimum Val. | Minimum | Maximum | Sign | t*Std.Dev. |
|---|------------------------|--------------|--------------|---------|---------|------|------------|
| 0 | log A1/s <sup>-1</sup> | 151.1933     | 193.7903     |         |         |      | 2.1445E-2  |
| 1 | E1 kJ/mol              | 1000.3192    | 1279.5762    |         |         | +    | 0.2594     |
| 2 | React.ord. 1           | 2.2206       | 2.7909       |         |         | +    | 0.1352     |
| 3 | Area 1/(J/g)           | 51.5447      | 51.5447      |         |         |      | constant   |

## STATISTICS

Least squares: 3.78766

Number of cycles: 23

Mean of residues: 0.15291

Max.No of cycles: 50

Correlation coefficient: 0.997733

Rel. precision: 0.001000

Durbin-Watson Value: 0.119

t-critical(0.95;98): 1.975

Durbin-Watson Factor: 2.944

## F-TEST ON FIT-QUALITY

| #  | Code | Fexp  | Fcrit(0.95) | f-act | Type 1 | Type 2 | Type 3 | Type 4 | Type 5 | Type 6 |
|----|------|-------|-------------|-------|--------|--------|--------|--------|--------|--------|
| 0  | s:   | 1.00  | 1.40        | 98    | Fn     |        |        |        |        |        |
| 1  | s:   | 1.24  | 1.40        | 99    | B1     |        |        |        |        |        |
| 2  | s:   | 1.33  | 1.40        | 97    | Cn B   |        |        |        |        |        |
| 3  | s:   | 1.44  | 1.40        | 98    | C1 B   |        |        |        |        |        |
| 4  | s:   | 1.96  | 1.40        | 99    | F2     |        |        |        |        |        |
| 5  | s:   | 5.58  | 1.40        | 98    | An     |        |        |        |        |        |
| 6  | s:   | 7.16  | 1.40        | 99    | A2     |        |        |        |        |        |
| 7  | s:   | 10.79 | 1.40        | 99    | F1     |        |        |        |        |        |
| 8  | s:   | 19.87 | 1.40        | 99    | R3     |        |        |        |        |        |
| 9  | s:   | 24.04 | 1.40        | 99    | D1F    |        |        |        |        |        |
| 10 | s:   | 26.36 | 1.40        | 99    | D3F    |        |        |        |        |        |
| 11 | s:   | 26.98 | 1.40        | 99    | R2     |        |        |        |        |        |
| 12 | s:   | 27.19 | 1.40        | 99    | D3     |        |        |        |        |        |
| 13 | s:   | 39.34 | 1.40        | 99    | D4     |        |        |        |        |        |
| 14 | s:   | 51.69 | 1.40        | 99    | D2     |        |        |        |        |        |
| 15 | s:   | 75.24 | 1.40        | 99    | D1     |        |        |        |        |        |
| 16 | s:   | 77.18 | 1.40        | 99    | A3     |        |        |        |        |        |

# Sample 10 / cycle 8 / Fn

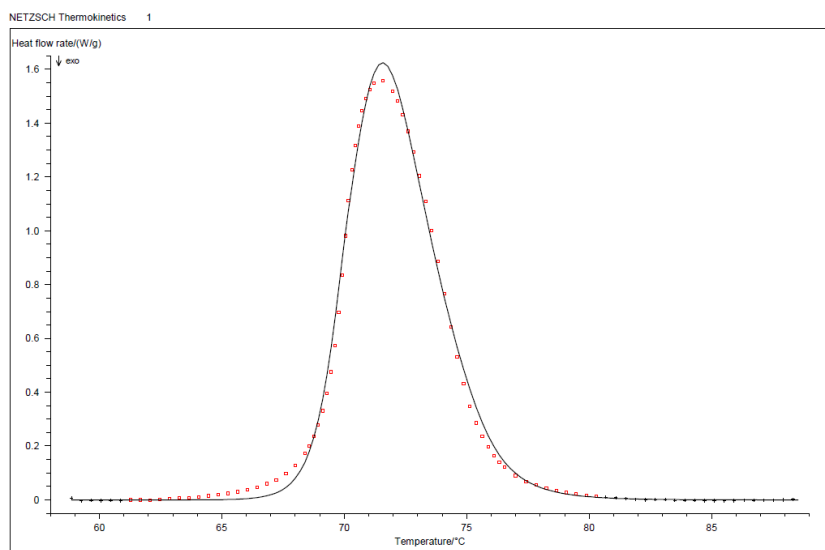

## NETZSCH Thermokinetics

Date/Time: 30.11.2016 at 12:53

Project: 1

Model 1: n-th order

A-1→B

Start evaluation: 0.00050

Measurement type: DSC

Fine evaluation: 0.99950

SCAN 1

Identity:

OP 320 16.11.2015 10:59:19/Segm.S1/2

Transfer Corr: 204 F1.kcr

Min. Temp/°C: 58.8685

Min. Time/min: 0.0

Max. Temp/°C: 88.5249

Max. Time/min: 3.3168

Heating rate/(K/min): 8.941

Sampling time/s: 1.345

Sample mass/mg: 4.960

LeftPts: 40

RightPts: 30

## PARAMETERS AND STANDARD DEVIATIONS

| # | Parameter              | Initial Val. | Optimum Val. | Minimum | Maximum | Sign | t*Std.Dev. |
|---|------------------------|--------------|--------------|---------|---------|------|------------|
| 0 | log A1/s <sup>-1</sup> | 160.3514     | 214.1834     |         |         |      | 2.2114E-2  |
| 1 | E1 kJ/mol              | 1063.2886    | 1417.1191    |         |         | +    | 0.2656     |
| 2 | React.ord. 1           | 2.3791       | 3.1199       |         |         | +    | 0.1441     |
| 3 | Area 1/(J/g)           | 51.1472      | 51.1472      |         |         |      | constant   |

## STATISTICS

|                          |          |                      |          |
|--------------------------|----------|----------------------|----------|
| Least squares:           | 4.10163  | Number of cycles:    | 22       |
| Mean of residues:        | 0.16591  | Max.No of cycles:    | 50       |
| Correlation coefficient: | 0.997667 | Rel. precision:      | 0.001000 |
| Durbin-Watson Value:     | 0.134    | t-critical(0.95;93): | 1.977    |
| Durbin-Watson Factor:    | 2.774    |                      |          |

## F-TEST ON FIT-QUALITY

| #  | Code | Fexp  | Fcrit(0.95) | f-act | Type 1 | Type 2 | Type 3 | Type 4 | Type 5 | Type 6 |
|----|------|-------|-------------|-------|--------|--------|--------|--------|--------|--------|
| 0  | s:   | 1.00  | 1.41        | 93    | Fn     |        |        |        |        |        |
| 1  | s:   | 1.01  | 1.41        | 92    | Cn B   |        |        |        |        |        |
| 2  | s:   | 1.40  | 1.41        | 94    | B1     |        |        |        |        |        |
| 3  | s:   | 1.75  | 1.41        | 93    | C1 B   |        |        |        |        |        |
| 4  | s:   | 2.63  | 1.41        | 94    | F2     |        |        |        |        |        |
| 5  | s:   | 5.61  | 1.41        | 93    | An     |        |        |        |        |        |
| 6  | s:   | 8.25  | 1.41        | 94    | A2     |        |        |        |        |        |
| 7  | s:   | 12.44 | 1.41        | 94    | F1     |        |        |        |        |        |
| 8  | s:   | 21.84 | 1.41        | 94    | R3     |        |        |        |        |        |
| 9  | s:   | 26.41 | 1.41        | 94    | D1F    |        |        |        |        |        |
| 10 | s:   | 28.93 | 1.41        | 94    | D3F    |        |        |        |        |        |
| 11 | s:   | 29.12 | 1.41        | 94    | R2     |        |        |        |        |        |
| 12 | s:   | 29.77 | 1.41        | 94    | D3     |        |        |        |        |        |
| 13 | s:   | 42.14 | 1.41        | 94    | D4     |        |        |        |        |        |
| 14 | s:   | 54.08 | 1.41        | 94    | D2     |        |        |        |        |        |
| 15 | s:   | 79.96 | 1.41        | 94    | D1     |        |        |        |        |        |
| 16 | s:   | 80.16 | 1.41        | 94    | A3     |        |        |        |        |        |

# Sample 10 / cycle 9 / Fn

NETZSCH Thermokinetics 1

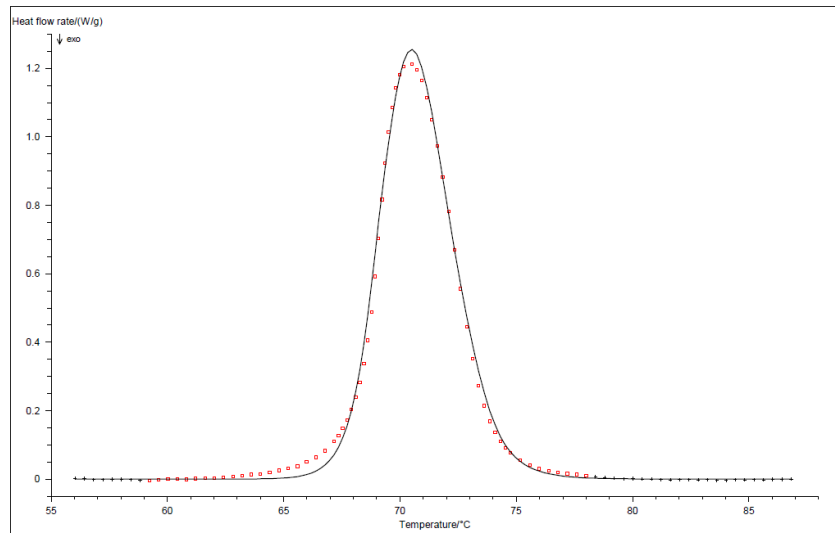

## NETZSCH Thermokinetics

Date/Time: 30.11.2016 at 12:58

Project: 1  
Model 1: n-th order

A—1→B

Start evaluation: 0.00050  
Fine evaluation: 0.99950  
SCAN 1 Identity:  
Transfer Corr: 204 F1.kcr  
Min. Temp/°C: 56.0229  
Max. Temp/°C: 86.8257  
Heating rate/(K/min): 5.975  
Sample mass/mg: 4.830  
Base line type:

Measurement type: DSC  
OP 320 16.11.2015 12:37:39/Segm.S1/1  
Min. Time/min: 0.0  
Max. Time/min: 5.1556  
Sampling time/s: 2.009  
LeftPts: 40 RightPts: 40

## PARAMETERS AND STANDARD DEVIATIONS

| # | Parameter              | Initial Val. | Optimum Val. | Minimum | Maximum | Sign | t*Std.Dev. |
|---|------------------------|--------------|--------------|---------|---------|------|------------|
| 0 | log A1/s <sup>-1</sup> | 218.2198     | 211.1602     |         |         |      | 0.3882     |
| 1 | E1 kJ/mol              | 1440.1318    | 1394.2123    |         |         | +    | 2.5890     |
| 2 | React.ord. 1           | 2.7456       | 2.5691       |         |         | +    | 8.4735E-2  |
| 3 | Area 1/(J/g)           | 50.4471      | 50.4471      |         |         |      | constant   |

## STATISTICS

Least squares: 2.05934 Number of cycles: 10  
Mean of residues: 0.11527 Max.No of cycles: 50  
Correlation coefficient: 0.997733 Rel. precision: 0.001000  
Durbin-Watson Value: 0.118 t-critical(0.95;93): 1.977  
Durbin-Watson Factor: 2.955

## F-TEST ON FIT-QUALITY

| #  | Code | Fexp  | Fcrit(0.95) | f-act | Type 1 | Type 2 | Type 3 | Type 4 | Type 5 | Type 6 |
|----|------|-------|-------------|-------|--------|--------|--------|--------|--------|--------|
| 0  | s:   | 1.00  | 1.41        | 94    | B1     |        |        |        |        |        |
| 1  | s:   | 1.11  | 1.41        | 93    | C1 B   |        |        |        |        |        |
| 2  | s:   | 1.18  | 1.41        | 92    | Cn B   |        |        |        |        |        |
| 3  | s:   | 1.44  | 1.41        | 93    | Fn     |        |        |        |        |        |
| 4  | s:   | 2.20  | 1.41        | 94    | F2     |        |        |        |        |        |
| 5  | s:   | 6.71  | 1.41        | 93    | An     |        |        |        |        |        |
| 6  | s:   | 7.53  | 1.41        | 94    | A3     |        |        |        |        |        |
| 7  | s:   | 8.72  | 1.41        | 94    | A2     |        |        |        |        |        |
| 8  | s:   | 13.16 | 1.41        | 94    | F1     |        |        |        |        |        |
| 9  | s:   | 25.17 | 1.41        | 94    | R3     |        |        |        |        |        |
| 10 | s:   | 29.38 | 1.41        | 94    | D1F    |        |        |        |        |        |
| 11 | s:   | 32.75 | 1.41        | 94    | D3F    |        |        |        |        |        |
| 12 | s:   | 33.95 | 1.41        | 94    | D3     |        |        |        |        |        |
| 13 | s:   | 35.45 | 1.41        | 94    | R2     |        |        |        |        |        |
| 14 | s:   | 49.83 | 1.41        | 94    | D4     |        |        |        |        |        |
| 15 | s:   | 62.41 | 1.41        | 94    | D2     |        |        |        |        |        |
| 16 | s:   | 98.12 | 1.41        | 94    | D1     |        |        |        |        |        |

## Sample 10 / cycle 10 / Fn

## NETZSCH Thermokinetics

Date/Time: 30.11.2016 at 13:12

Project: 1  
Model 1: n-th order

A-1→B

Start evaluation: 0.00050 Measurement type: DSC  
 Fine evaluation: 0.99950  
 SCAN 1 Identity: OP 320 16.11.2015 13:22:15/Segm.S1/1  
 Transfer Corr: 204\_F1.kcr  
 Min. Temp/°C: 55.3712 Min. Time/min: 0.0  
 Max. Temp/°C: 91.3669 Max. Time/min: 3.0129  
 Heating rate/(K/min): 11.947 Sampling time/s: 1.004  
 Sample mass/mg: 4.830  
 Base line type: LeftPts: 40 RightPts: 40

## PARAMETERS AND STANDARD DEVIATIONS

| # | Parameter              | Initial Val. | Optimum Val. | Minimum | Maximum | Sign | t*Std.Dev. |
|---|------------------------|--------------|--------------|---------|---------|------|------------|
| 0 | log A1/s <sup>-1</sup> | 127.9042     | 172.2243     |         |         |      | 0.1140     |
| 1 | E1 kJ/mol              | 847.2056     | 1137.6793    |         |         | +    | 0.7803     |
| 2 | React.ord. 1           | 2.1922       | 2.8824       |         |         | +    | 7.8872E-2  |
| 3 | Area 1/(J/g)           | 52.1064      | 52.1064      |         |         |      | constant   |

## STATISTICS

Least squares: 5.86180 Number of cycles: 21  
 Mean of residues: 0.17996 Max.No of cycles: 50  
 Correlation coefficient: 0.997525 Rel. precision: 0.001000  
 Durbin-Watson Value: 0.099 t-critical(0.95;117): 1.971  
 Durbin-Watson Factor: 3.221

## F-TEST ON FIT-QUALITY

| #  | Code | Fexp  | Fcrit(0.95) | f-act | Type 1 | Type 2 | Type 3 | Type 4 | Type 5 | Type 6 |
|----|------|-------|-------------|-------|--------|--------|--------|--------|--------|--------|
| 0  | s:   | 1.00  | 1.36        | 117   | Fn     |        |        |        |        |        |
| 1  | s:   | 1.32  | 1.36        | 116   | Cn B   |        |        |        |        |        |
| 2  | s:   | 1.44  | 1.36        | 117   | C1 B   |        |        |        |        |        |
| 3  | s:   | 2.04  | 1.36        | 118   | F2     |        |        |        |        |        |
| 4  | s:   | 5.22  | 1.36        | 117   | An     |        |        |        |        |        |
| 5  | s:   | 5.23  | 1.36        | 118   | B1     |        |        |        |        |        |
| 6  | s:   | 6.98  | 1.36        | 118   | A2     |        |        |        |        |        |
| 7  | s:   | 10.33 | 1.36        | 118   | F1     |        |        |        |        |        |
| 8  | s:   | 18.68 | 1.36        | 118   | R3     |        |        |        |        |        |
| 9  | s:   | 22.51 | 1.36        | 118   | D1F    |        |        |        |        |        |
| 10 | s:   | 24.61 | 1.36        | 118   | D3F    |        |        |        |        |        |
| 11 | s:   | 25.12 | 1.36        | 118   | R2     |        |        |        |        |        |
| 12 | s:   | 25.31 | 1.36        | 118   | D3     |        |        |        |        |        |
| 13 | s:   | 36.47 | 1.36        | 118   | D4     |        |        |        |        |        |
| 14 | s:   | 48.03 | 1.36        | 118   | D2     |        |        |        |        |        |
| 15 | s:   | 64.38 | 1.36        | 118   | A3     |        |        |        |        |        |
| 16 | s:   | 70.47 | 1.36        | 118   | D1     |        |        |        |        |        |

# Sample 11 / cycle 1 / Fn

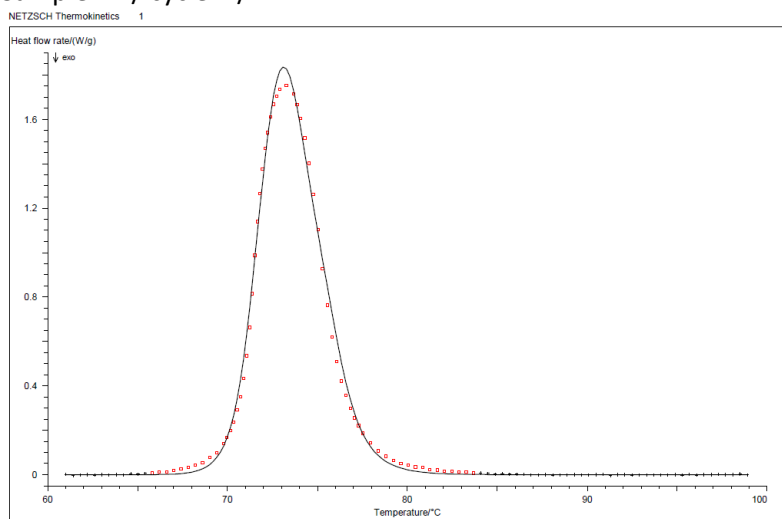

## NETZSCH Thermokinetics

Date/Time: 30.11.2016 at 13:48

Project: 1

Model 1: n-th order

A—1→B

Start evaluation: 0.00050

Measurement type: DSC

Fine evaluation: 0.99950

SCAN 1 Identity:

OP320 21.04.2016 17:11:05/Segm.S2/3

Transfer Corr: 204 F1.kcr

Min. Temp/°C: 61.0056

Min. Time/min: 0.0

Max. Temp/°C: 98.8907

Max. Time/min: 4.2167

Heating rate/(K/min): 8.984

Sampling time/s: 1.339

Sample mass/mg: 3.870

LeftPts: 25

RightPts: 25

## PARAMETERS AND STANDARD DEVIATIONS

| # | Parameter              | Initial Val. | Optimum Val. | Minimum | Maximum | Sign | t*Std.Dev. |
|---|------------------------|--------------|--------------|---------|---------|------|------------|
| 0 | log A1/s <sup>-1</sup> | 148.9849     | 200.9381     |         |         |      | 2.2954E-2  |
| 1 | E1 kJ/mol              | 993.3331     | 1336.3436    |         |         | +    | 0.3001     |
| 2 | React.ord. 1           | 2.0858       | 2.7147       |         |         | +    | 0.1550     |
| 3 | Area 1/(J/g)           | 54.5068      | 54.5068      |         |         |      | constant   |

## STATISTICS

Least squares: 3.90971

Number of cycles: 23

Mean of residues: 0.14345

Max.No of cycles: 50

Correlation coefficient: 0.997630

Rel. precision: 0.001000

Durbin-Watson Value: 0.171

t-critical(0.95;88): 1.978

Durbin-Watson Factor: 2.473

## F-TEST ON FIT-QUALITY

| #  | Code | Fexp  | Fcrit(0.95) | f-act | Type 1 | Type 2 | Type 3 | Type 4 | Type 5 | Type 6 |
|----|------|-------|-------------|-------|--------|--------|--------|--------|--------|--------|
| 0  | s:   | 1.00  | 1.43        | 88    | Fn     |        |        |        |        |        |
| 1  | s:   | 1.28  | 1.43        | 87    | Cn B   |        |        |        |        |        |
| 2  | s:   | 1.55  | 1.42        | 89    | B1     |        |        |        |        |        |
| 3  | s:   | 1.59  | 1.43        | 88    | C1 B   |        |        |        |        |        |
| 4  | s:   | 1.83  | 1.42        | 89    | F2     |        |        |        |        |        |
| 5  | s:   | 5.46  | 1.43        | 88    | An     |        |        |        |        |        |
| 6  | s:   | 7.32  | 1.42        | 89    | A2     |        |        |        |        |        |
| 7  | s:   | 10.31 | 1.42        | 89    | F1     |        |        |        |        |        |
| 8  | s:   | 16.62 | 1.42        | 89    | A3     |        |        |        |        |        |
| 9  | s:   | 18.86 | 1.42        | 89    | R3     |        |        |        |        |        |
| 10 | s:   | 22.46 | 1.42        | 89    | D1F    |        |        |        |        |        |
| 11 | s:   | 24.05 | 1.42        | 89    | D3F    |        |        |        |        |        |
| 12 | s:   | 24.76 | 1.42        | 89    | D3     |        |        |        |        |        |
| 13 | s:   | 25.25 | 1.42        | 89    | R2     |        |        |        |        |        |
| 14 | s:   | 35.83 | 1.42        | 89    | D4     |        |        |        |        |        |
| 15 | s:   | 44.65 | 1.42        | 89    | D2     |        |        |        |        |        |
| 16 | s:   | 69.13 | 1.42        | 89    | D1     |        |        |        |        |        |

# Sample 11 / cycle 2 / Fn

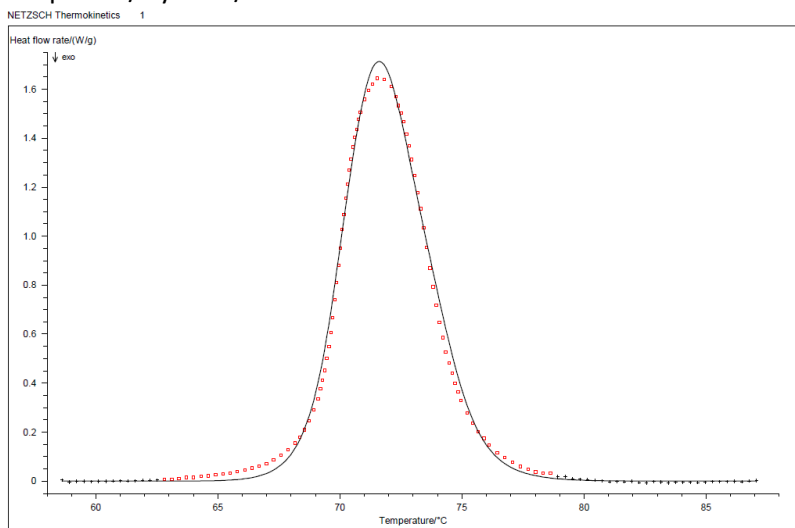

NETZSCH Thermokinetics

Date/Time: 30.11.2016 at 13:58

Project: 1

Model 1: n-th order

A—1→B

Start evaluation: 0.00050

Measurement type: DSC

Fine evaluation: 0.99950

SCAN 1

Identity:

OP320 22.04.2016 12:59:05/Segm.S1/2

Transfer Corr: 204 F1.kcr

Min. Temp/°C: 58.6101

Min. Time/min: 0.0

Max. Temp/°C: 87.0675

Max. Time/min: 3.1823

Heating rate/(K/min): 8.943

Sampling time/s: 0.672

Sample mass/mg: 3.870

Base line type:

LeftPts: 80

RightPts: 60

## PARAMETERS AND STANDARD DEVIATIONS

| # | Parameter              | Initial Val. | Optimum Val. | Minimum | Maximum | Sign | t*Std.Dev. |
|---|------------------------|--------------|--------------|---------|---------|------|------------|
| 0 | log A1/s <sup>-1</sup> | 138.1023     | 183.2205     |         |         |      | 7.9662E-2  |
| 1 | E1 kJ/mol              | 917.4334     | 1213.9596    |         |         | +    | 0.5554     |
| 2 | React.ord. 1           | 1.8396       | 2.4320       |         |         | +    | 6.1316E-2  |
| 3 | Area 1/(J/g)           | 51.2669      | 51.2669      |         |         |      | constant   |

## STATISTICS

|                          |          |                       |          |
|--------------------------|----------|-----------------------|----------|
| Least squares:           | 4.28818  | Number of cycles:     | 18       |
| Mean of residues:        | 0.12266  | Max.No of cycles:     | 50       |
| Correlation coefficient: | 0.997585 | Rel. precision:       | 0.001000 |
| Durbin-Watson Value:     | 0.044    | t-critical(0.95;159): | 1.966    |
| Durbin-Watson Factor:    | 4.800    |                       |          |

## F-TEST ON FIT-QUALITY

| #  | Code | Fexp  | Fcrit(0.95) | f-act | Type 1 | Type 2 | Type 3 | Type 4 | Type 5 | Type 6 |
|----|------|-------|-------------|-------|--------|--------|--------|--------|--------|--------|
| 0  | s:   | 1.00  | 1.30        | 159   | Fn     |        |        |        |        |        |
| 1  | s:   | 1.21  | 1.30        | 160   | B1     |        |        |        |        |        |
| 2  | s:   | 1.28  | 1.30        | 159   | C1 B   |        |        |        |        |        |
| 3  | s:   | 1.38  | 1.30        | 160   | F2     |        |        |        |        |        |
| 4  | s:   | 1.48  | 1.30        | 158   | Cn B   |        |        |        |        |        |
| 5  | s:   | 5.07  | 1.30        | 159   | An     |        |        |        |        |        |
| 6  | s:   | 5.76  | 1.30        | 160   | A3     |        |        |        |        |        |
| 7  | s:   | 6.53  | 1.30        | 160   | A2     |        |        |        |        |        |
| 8  | s:   | 9.16  | 1.30        | 160   | F1     |        |        |        |        |        |
| 9  | s:   | 17.75 | 1.30        | 160   | R3     |        |        |        |        |        |
| 10 | s:   | 20.83 | 1.30        | 160   | D1F    |        |        |        |        |        |
| 11 | s:   | 22.45 | 1.30        | 160   | D3F    |        |        |        |        |        |
| 12 | s:   | 23.23 | 1.30        | 160   | D3     |        |        |        |        |        |
| 13 | s:   | 24.64 | 1.30        | 160   | R2     |        |        |        |        |        |
| 14 | s:   | 35.59 | 1.30        | 160   | D4     |        |        |        |        |        |
| 15 | s:   | 46.30 | 1.30        | 160   | D2     |        |        |        |        |        |
| 16 | s:   | 71.50 | 1.30        | 160   | D1     |        |        |        |        |        |

## Sample 11 / cycle 3 / Fn

NETZSCH Thermokinetics 1

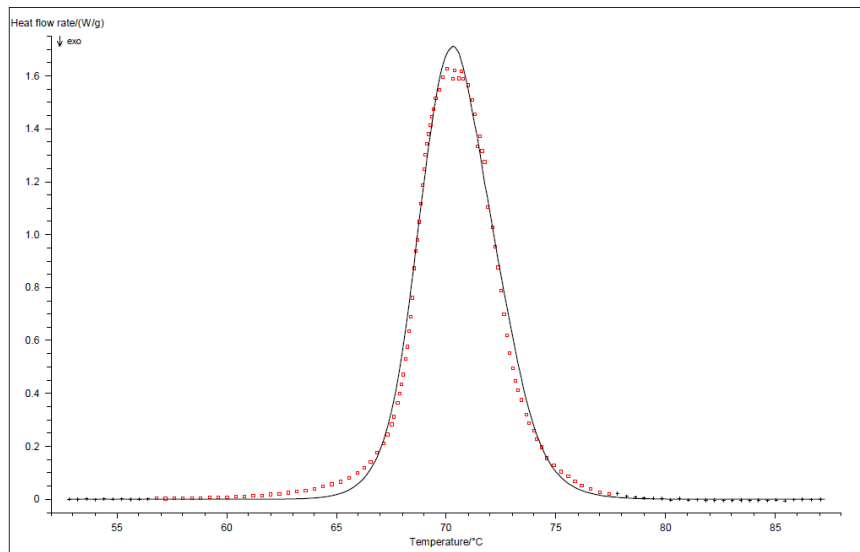

## NETZSCH Thermokinetics

Date/Time: 30.11.2016 at 14:01

Project: 1  
Model 1: n-th order

A—1→B

Start evaluation: 0.00050 Measurement type: DSC  
 Fine evaluation: 0.99950  
 SCAN 1 Identity: OP320 22.04.2016 13:30:23/Segm.S1/2  
 Transfer Corr: 204 F1.kcr  
 Min. Temp/°C: 52.8214 Min. Time/min: 0.0  
 Max. Temp/°C: 87.2370 Max. Time/min: 3.8442  
 Heating rate/(K/min): 8.953 Sampling time/s: 0.671  
 Sample mass/mg: 3.870  
 Base line type: LeftPts: 80 RightPts: 80

## PARAMETERS AND STANDARD DEVIATIONS

| # | Parameter              | Initial Val. | Optimum Val. | Minimum | Maximum | Sign | t*Std.Dev. |
|---|------------------------|--------------|--------------|---------|---------|------|------------|
| 0 | log A1/s <sup>-1</sup> | 128.1791     | 173.4898     |         |         |      | 8.7350E-2  |
| 1 | E1 kJ/mol              | 848.8379     | 1145.4713    |         |         | +    | 0.6070     |
| 2 | React.ord. 1           | 1.7230       | 2.3204       |         |         | +    | 6.4286E-2  |
| 3 | Area 1/(J/g)           | 51.6411      | 51.6411      |         |         |      | constant   |

## STATISTICS

Least squares: 5.11376 Number of cycles: 14  
 Mean of residues: 0.12175 Max.No of cycles: 50  
 Correlation coefficient: 0.996928 Rel. precision: 0.001000  
 Durbin-Watson Value: 0.158 t-critical(0.95;204): 1.963  
 Durbin-Watson Factor: 2.569

## F-TEST ON FIT-QUALITY

| #  | Code | Fexp  | Fcrit(0.95) | f-act | Type 1 | Type 2 | Type 3 | Type 4 | Type 5 | Type 6 |
|----|------|-------|-------------|-------|--------|--------|--------|--------|--------|--------|
| 0  | s:   | 1.00  | 1.26        | 204   | Fn     |        |        |        |        |        |
| 1  | s:   | 1.02  | 1.26        | 205   | B1     |        |        |        |        |        |
| 2  | s:   | 1.04  | 1.26        | 204   | C1 B   |        |        |        |        |        |
| 3  | s:   | 1.15  | 1.26        | 205   | F2     |        |        |        |        |        |
| 4  | s:   | 1.19  | 1.26        | 203   | Cn B   |        |        |        |        |        |
| 5  | s:   | 3.86  | 1.26        | 204   | An     |        |        |        |        |        |
| 6  | s:   | 3.97  | 1.26        | 205   | A3     |        |        |        |        |        |
| 7  | s:   | 4.35  | 1.26        | 205   | A2     |        |        |        |        |        |
| 8  | s:   | 6.00  | 1.26        | 205   | F1     |        |        |        |        |        |
| 9  | s:   | 11.60 | 1.26        | 205   | R3     |        |        |        |        |        |
| 10 | s:   | 13.64 | 1.26        | 205   | D1F    |        |        |        |        |        |
| 11 | s:   | 14.72 | 1.26        | 205   | D3F    |        |        |        |        |        |
| 12 | s:   | 15.21 | 1.26        | 205   | D3     |        |        |        |        |        |
| 13 | s:   | 16.19 | 1.26        | 205   | R2     |        |        |        |        |        |
| 14 | s:   | 23.66 | 1.26        | 205   | D4     |        |        |        |        |        |
| 15 | s:   | 31.39 | 1.26        | 205   | D2     |        |        |        |        |        |
| 16 | s:   | 49.08 | 1.26        | 205   | D1     |        |        |        |        |        |

# Sample 11 / cycle 4 / Fn

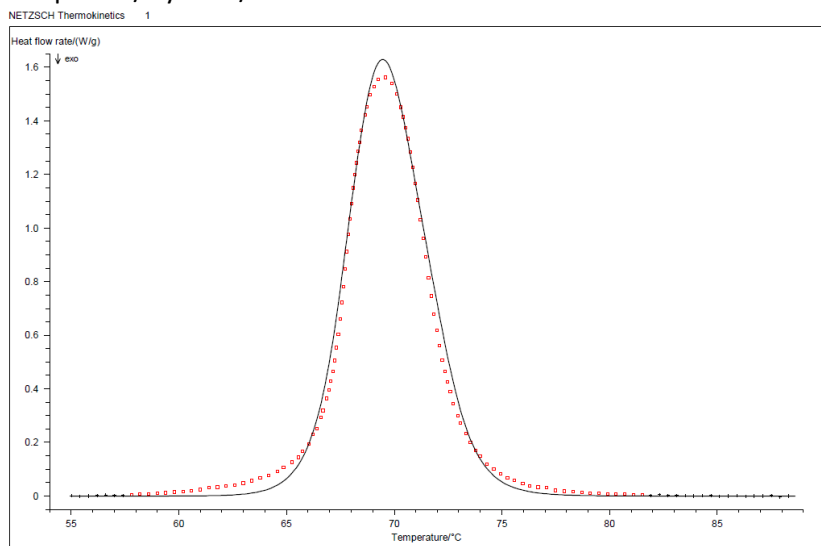

## NETZSCH Thermokinetics

Date/Time: 30.11.2016 at 14:06

Project: 1  
Model 1: n-th order

A—1→B

Start evaluation: 0.00050  
Fine evaluation: 0.99950  
SCAN 1 Identity: 204 F1.kcr  
Transfer Corr: 55.0104  
Min. Temp/°C: 88.6123  
Max. Temp/°C: 8.946  
Heating rate/(K/min): 3.870  
Sample mass/mg:  
Base line type:

Measurement type: DSC  
OP320 22.04.2016 14:15:05/Segm.S1/2  
Min. Time/min: 0.0  
Max. Time/min: 3.7561  
Sampling time/s: 0.671  
LeftPts: 40 RightPts: 40

## PARAMETERS AND STANDARD DEVIATIONS

| # | Parameter              | Initial Val. | Optimum Val. | Minimum | Maximum | Sign | t*Std.Dev. |
|---|------------------------|--------------|--------------|---------|---------|------|------------|
| 0 | log A1/s <sup>-1</sup> | 143.7636     | 159.3734     |         |         |      | 0.2045     |
| 1 | E1 kJ/mol              | 948.5039     | 1050.4797    |         |         | +    | 1.3778     |
| 2 | React.ord. 1           | 2.0385       | 2.2334       |         |         | +    | 6.5431E-2  |
| 3 | Area 1/(J/g)           | 51.6792      | 51.6792      |         |         |      | constant   |

## STATISTICS

Least squares: 5.55452  
Mean of residues: 0.12838  
Correlation coefficient: 0.996625  
Durbin-Watson Value: 0.024  
Durbin-Watson Factor: 6.487

Number of cycles: 7  
Max.No of cycles: 50  
Rel. precision: 0.001000  
t-critical(0.95;237): 1.961

## F-TEST ON FIT-QUALITY

| #  | Code | Fexp  | Fcrit(0.95) | f-act | Type 1 | Type 2 | Type 3 | Type 4 | Type 5 | Type 6 |
|----|------|-------|-------------|-------|--------|--------|--------|--------|--------|--------|
| 0  | s:   | 1.00  | 1.24        | 237   | C1 B   |        |        |        |        |        |
| 1  | s:   | 1.01  | 1.24        | 238   | B1     |        |        |        |        |        |
| 2  | s:   | 1.05  | 1.24        | 236   | Cn B   |        |        |        |        |        |
| 3  | s:   | 1.44  | 1.24        | 237   | Fn     |        |        |        |        |        |
| 4  | s:   | 1.54  | 1.24        | 238   | F2     |        |        |        |        |        |
| 5  | s:   | 4.03  | 1.24        | 237   | An     |        |        |        |        |        |
| 6  | s:   | 4.71  | 1.24        | 238   | A3     |        |        |        |        |        |
| 7  | s:   | 5.31  | 1.24        | 238   | A2     |        |        |        |        |        |
| 8  | s:   | 7.28  | 1.24        | 238   | F1     |        |        |        |        |        |
| 9  | s:   | 14.27 | 1.24        | 238   | R3     |        |        |        |        |        |
| 10 | s:   | 15.78 | 1.24        | 238   | D1F    |        |        |        |        |        |
| 11 | s:   | 17.52 | 1.24        | 238   | D3F    |        |        |        |        |        |
| 12 | s:   | 18.40 | 1.24        | 238   | D3     |        |        |        |        |        |
| 13 | s:   | 20.03 | 1.24        | 238   | R2     |        |        |        |        |        |
| 14 | s:   | 29.21 | 1.24        | 238   | D4     |        |        |        |        |        |
| 15 | s:   | 37.71 | 1.24        | 238   | D2     |        |        |        |        |        |
| 16 | s:   | 58.72 | 1.24        | 238   | D1     |        |        |        |        |        |

# Sample 11 / cycle 5 / Fn

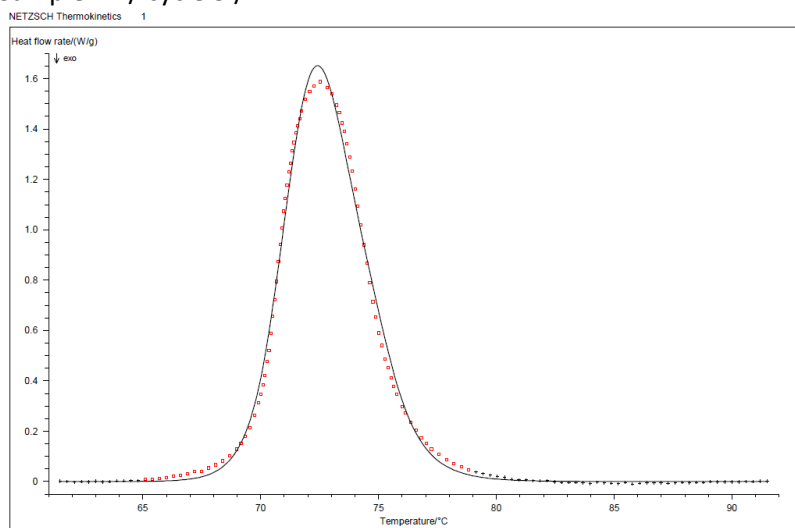

## NETZSCH Thermokinetics

Date/Time: 30.11.2016 at 14:13

Project: 1  
Model: 1: n-th order

A → B

Start evaluation: 0.00050 Measurement type: DSC  
Fine evaluation: 0.99950  
SCAN 1 Identity: OP320 26.04.2016 11:13:10/Segm.S1/2  
Transfer Corr: 204\_F1.kcr  
Min. Temp/°C: 61.4923 Min. Time/min: 0.0  
Max. Temp/°C: 91.4874 Max. Time/min: 3.3423  
Heating rate/(K/min): 8.974 Sampling time/s: 0.671  
Sample mass/mg: 3.870  
Base line type: LeftPts: 30 RightPts: 80

## PARAMETERS AND STANDARD DEVIATIONS

| # | Parameter              | Initial Val. | Optimum Val. | Minimum | Maximum | Sign | t*Std.Dev. |
|---|------------------------|--------------|--------------|---------|---------|------|------------|
| 0 | log A1/s <sup>-1</sup> | 187.3333     | 187.3333     |         |         |      | 1.7556E-2  |
| 1 | E1 kJ/mol              | 1243.9742    | 1243.9742    |         |         | +    | 0.2293     |
| 2 | React.ord. 1           | 2.5402       | 2.5402       |         |         | +    | 0.1159     |
| 3 | Area 1/(J/g)           | 49.1985      | 49.1985      |         |         |      | constant   |

## STATISTICS

Least squares: 3.51731 Number of cycles: 14  
Mean of residues: 0.10828 Max.No of cycles: 50  
Correlation coefficient: 0.997558 Rel. precision: 0.001000  
Durbin-Watson Value: 0.058 t-critical(0.95;137): 1.968  
Durbin-Watson Factor: 4.180

## F-TEST ON FIT-QUALITY

| #  | Code | Fexp  | Fcrit(0.95) | f-act | Type 1 | Type 2 | Type 3 | Type 4 | Type 5 | Type 6 |
|----|------|-------|-------------|-------|--------|--------|--------|--------|--------|--------|
| 0  | s:   | 1.00  | 1.33        | 136   | Bna    |        |        |        |        |        |
| 1  | s:   | 1.01  | 1.33        | 137   | Fn     |        |        |        |        |        |
| 2  | s:   | 1.01  | 1.33        | 136   | Cn B   |        |        |        |        |        |
| 3  | s:   | 1.64  | 1.33        | 138   | F2     |        |        |        |        |        |
| 4  | s:   | 1.65  | 1.33        | 138   | B1     |        |        |        |        |        |
| 5  | s:   | 1.84  | 1.33        | 137   | C1 B   |        |        |        |        |        |
| 6  | s:   | 5.61  | 1.33        | 137   | An     |        |        |        |        |        |
| 7  | s:   | 6.96  | 1.33        | 138   | A3     |        |        |        |        |        |
| 8  | s:   | 8.06  | 1.33        | 138   | A2     |        |        |        |        |        |
| 9  | s:   | 11.08 | 1.33        | 138   | F1     |        |        |        |        |        |
| 10 | s:   | 20.95 | 1.33        | 138   | R3     |        |        |        |        |        |
| 11 | s:   | 24.77 | 1.33        | 138   | D1F    |        |        |        |        |        |
| 12 | s:   | 26.06 | 1.33        | 138   | D3F    |        |        |        |        |        |
| 13 | s:   | 26.76 | 1.33        | 138   | D3     |        |        |        |        |        |
| 14 | s:   | 28.67 | 1.33        | 138   | R2     |        |        |        |        |        |
| 15 | s:   | 40.24 | 1.33        | 138   | D4     |        |        |        |        |        |
| 16 | s:   | 53.45 | 1.33        | 138   | D2     |        |        |        |        |        |
| 17 | s:   | 80.13 | 1.33        | 138   | D1     |        |        |        |        |        |

## Sample 11 / cycle 6 / Fn

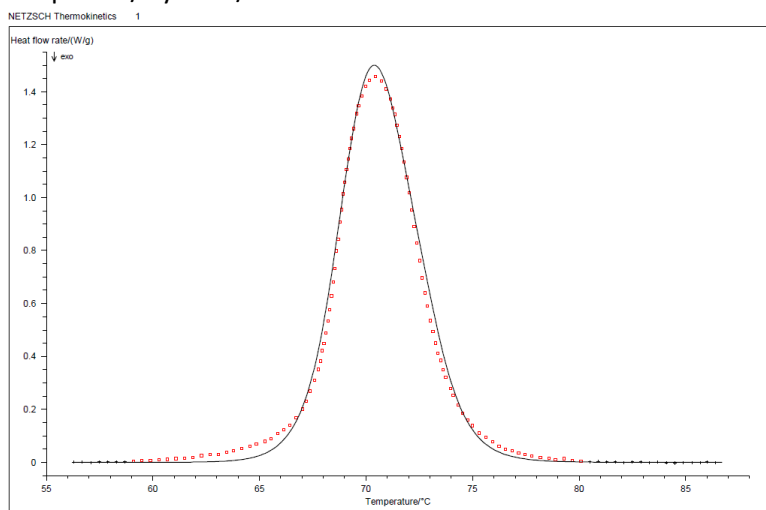

## NETZSCH Thermokinetics

Date/Time: 30.11.2016 at 14:17

Project: 1  
Model 1: n-th order

A—1→B

Start evaluation: 0.00050

Measurement type: DSC

Fine evaluation: 0.99950

SCAN 1 Identity:

OP320 26.04.2016 13:08:26/Segm.S1/2

Transfer Corr: 204 F1.kcr

Min. Temp/°C: 55.9890

Min. Time/min: 0.0

Max. Temp/°C: 86.4000

Max. Time/min: 3.3963

Heating rate/(K/min): 8.954

Sampling time/s: 0.670

Sample mass/mg: 3.870

Base line type:

LeftPts: 70

RightPts: 25

## PARAMETERS AND STANDARD DEVIATIONS

| # | Parameter              | Initial Val. | Optimum Val. | Minimum | Maximum | Sign | t*Std.Dev. |
|---|------------------------|--------------|--------------|---------|---------|------|------------|
| 0 | log A1/s <sup>-1</sup> | 141.7254     | 153.5169     |         |         |      | 0.1854     |
| 1 | E1 kJ/mol              | 937.6999     | 1014.9295    |         |         | +    | 1.2548     |
| 2 | React.ord. 1           | 2.0389       | 2.2035       |         |         | +    | 6.2383E-2  |
| 3 | Area 1/(J/g)           | 48.3202      | 48.3202      |         |         |      | constant   |

## STATISTICS

Least squares: 4.34836

Number of cycles: 6

Mean of residues: 0.11940

Max.No of cycles: 50

Correlation coefficient: 0.997120

Rel. precision: 0.001000

Durbin-Watson Value: 0.028

t-critical(0.95;217): 1.962

Durbin-Watson Factor: 5.945

## F-TEST ON FIT-QUALITY

| #  | Code | Fexp  | Fcrit(0.95) | f-act | Type 1 | Type 2 | Type 3 | Type 4 | Type 5 | Type 6 |
|----|------|-------|-------------|-------|--------|--------|--------|--------|--------|--------|
| 0  | s:   | 1.00  | 1.25        | 217   | C1 B   |        |        |        |        |        |
| 1  | s:   | 1.01  | 1.25        | 218   | B1     |        |        |        |        |        |
| 2  | s:   | 1.04  | 1.25        | 216   | Cn B   |        |        |        |        |        |
| 3  | s:   | 1.56  | 1.25        | 217   | Fn     |        |        |        |        |        |
| 4  | s:   | 1.67  | 1.25        | 218   | F2     |        |        |        |        |        |
| 5  | s:   | 1.98  | 1.30        | 136   | Bna    |        |        |        |        |        |
| 6  | s:   | 5.34  | 1.25        | 217   | An     |        |        |        |        |        |
| 7  | s:   | 6.29  | 1.25        | 218   | A3     |        |        |        |        |        |
| 8  | s:   | 7.05  | 1.25        | 218   | A2     |        |        |        |        |        |
| 9  | s:   | 9.44  | 1.25        | 218   | F1     |        |        |        |        |        |
| 10 | s:   | 18.95 | 1.25        | 218   | R3     |        |        |        |        |        |
| 11 | s:   | 20.54 | 1.25        | 218   | D1F    |        |        |        |        |        |
| 12 | s:   | 22.67 | 1.25        | 218   | D3F    |        |        |        |        |        |
| 13 | s:   | 23.83 | 1.25        | 218   | D3     |        |        |        |        |        |
| 14 | s:   | 26.76 | 1.25        | 218   | R2     |        |        |        |        |        |
| 15 | s:   | 37.49 | 1.25        | 218   | D4     |        |        |        |        |        |
| 16 | s:   | 49.12 | 1.25        | 218   | D2     |        |        |        |        |        |
| 17 | s:   | 78.10 | 1.25        | 218   | D1     |        |        |        |        |        |

# Sample 11 / cycle 7 / Fn

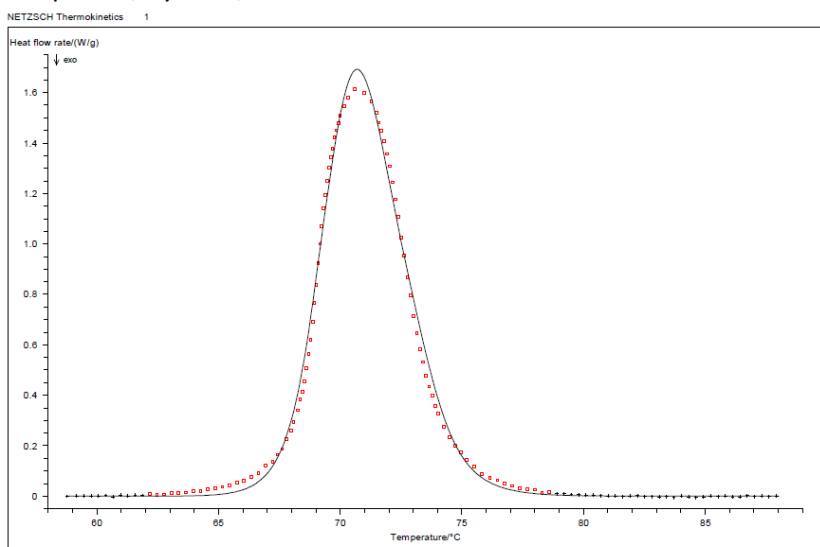

## NETZSCH Thermokinetics

Date/Time: 30.11.2016 at 14:19

Project: 1  
Model 1: n-th order

A—1→B

Start evaluation: 0.00050 Measurement type: DSC  
Fine evaluation: 0.99950  
SCAN 1 Identity: OP320 26.04.2016 13:49:33/Segm.S2/3  
Transfer Corr: 204 F1.kcr  
Min. Temp/°C: 58.7664 Min. Time/min: 0.0  
Max. Temp/°C: 88.0168 Max. Time/min: 3.2574  
Heating rate/(K/min): 8.980 Sampling time/s: 0.669  
Sample mass/mg: 3.770  
Base line type: LeftPts: 25 RightPts: 45

## PARAMETERS AND STANDARD DEVIATIONS

| # | Parameter              | Initial Val. | Optimum Val. | Minimum | Maximum | Sign | t*Std.Dev. |
|---|------------------------|--------------|--------------|---------|---------|------|------------|
| 0 | log A1/s <sup>-1</sup> | 186.5360     | 186.5360     |         |         |      | 1.7208E-2  |
| 1 | E1 kJ/mol              | 1232.4762    | 1232.4762    |         |         | +    | 0.2275     |
| 2 | React.ord. 1           | 2.4867       | 2.4867       |         |         | +    | 0.1146     |
| 3 | Area 1/(J/g)           | 49.7442      | 49.7442      |         |         |      | constant   |

## STATISTICS

Least squares: 4.31777 Number of cycles: 14  
Mean of residues: 0.12139 Max.No of cycles: 50  
Correlation coefficient: 0.997483 Rel. precision: 0.001000  
Durbin-Watson Value: 0.058 t-critical(0.95;163): 1.966  
Durbin-Watson Factor: 4.196

## F-TEST ON FIT-QUALITY

| #  | Code | Fexp  | Fcrit(0.95) | f-act | Type 1 | Type 2 | Type 3 | Type 4 | Type 5 | Type 6 |
|----|------|-------|-------------|-------|--------|--------|--------|--------|--------|--------|
| 0  | s:   | 1.00  | 1.30        | 162   | Bna    |        |        |        |        |        |
| 1  | s:   | 1.11  | 1.30        | 163   | Fn     |        |        |        |        |        |
| 2  | s:   | 1.12  | 1.30        | 162   | Cn B   |        |        |        |        |        |
| 3  | s:   | 1.53  | 1.30        | 164   | B1     |        |        |        |        |        |
| 4  | s:   | 1.60  | 1.30        | 164   | F2     |        |        |        |        |        |
| 5  | s:   | 1.63  | 1.30        | 163   | C1 B   |        |        |        |        |        |
| 6  | s:   | 5.54  | 1.30        | 163   | An     |        |        |        |        |        |
| 7  | s:   | 6.34  | 1.30        | 164   | A3     |        |        |        |        |        |
| 8  | s:   | 7.22  | 1.30        | 164   | A2     |        |        |        |        |        |
| 9  | s:   | 9.99  | 1.30        | 164   | F1     |        |        |        |        |        |
| 10 | s:   | 19.10 | 1.30        | 164   | R3     |        |        |        |        |        |
| 11 | s:   | 22.70 | 1.30        | 164   | D1F    |        |        |        |        |        |
| 12 | s:   | 24.07 | 1.30        | 164   | D3F    |        |        |        |        |        |
| 13 | s:   | 24.74 | 1.30        | 164   | D3     |        |        |        |        |        |
| 14 | s:   | 26.36 | 1.30        | 164   | R2     |        |        |        |        |        |
| 15 | s:   | 37.47 | 1.30        | 164   | D4     |        |        |        |        |        |
| 16 | s:   | 50.09 | 1.30        | 164   | D2     |        |        |        |        |        |
| 17 | s:   | 76.35 | 1.30        | 164   | D1     |        |        |        |        |        |

# Sample 11 / cycle 8 / Fn

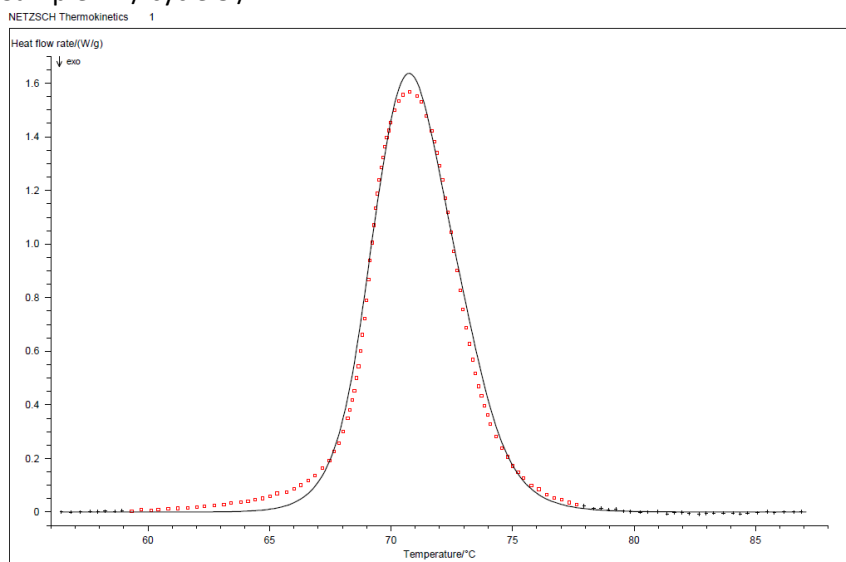

## NETZSCH Thermokinetics

Date/Time: 30.11.2016 at 14:23

Project: 1

Model 1: n-th order

A→1→B

Start evaluation: 0.00050

Measurement type: DSC

Fine evaluation: 0.99950

SCAN 1

Identity:

OP320 27.04.2016 15:05:36/Segm.S1/2

Transfer Corr: 204 F1.kcr

Min. Temp/°C: 56.4318

Min. Time/min: 0.0

Max. Temp/°C: 87.0779

Max. Time/min: 3.4272

Heating rate/(K/min): 8.942

Sampling time/s: 0.672

Sample mass/mg: 3.770

LeftPts: 20

RightPts: 70

## PARAMETERS AND STANDARD DEVIATIONS

| # | Parameter              | Initial Val. | Optimum Val. | Minimum | Maximum | Sign | t*Std.Dev. |
|---|------------------------|--------------|--------------|---------|---------|------|------------|
| 0 | log A1/s <sup>-1</sup> | 172.7381     | 172.7201     |         |         |      | 4.5784E-2  |
| 1 | E1 kJ/mol              | 1142.0803    | 1141.9622    |         |         | +    | 0.3375     |
| 2 | React.ord. 1           | 2.3893       | 2.3890       |         |         | +    | 6.8513E-2  |
| 3 | Area 1/(J/g)           | 50.3020      | 50.3020      |         |         |      | constant   |

## STATISTICS

Least squares: 5.05118

Number of cycles: 2

Mean of residues: 0.12827

Max.No of cycles: 50

Correlation coefficient: 0.996880

Rel. precision: 0.001000

Durbin-Watson Value: 0.031

t-critical(0.95;184): 1.964

Durbin-Watson Factor: 5.709

## F-TEST ON FIT-QUALITY

| #  | Code | Fexp  | Fcrit(0.95) | f-act | Type 1 | Type 2 | Type 3 | Type 4 | Type 5 | Type 6 |
|----|------|-------|-------------|-------|--------|--------|--------|--------|--------|--------|
| 0  | s:   | 1.00  | 1.28        | 185   | B1     |        |        |        |        |        |
| 1  | s:   | 1.02  | 1.29        | 162   | Bna    |        |        |        |        |        |
| 2  | s:   | 1.03  | 1.28        | 184   | C1 B   |        |        |        |        |        |
| 3  | s:   | 1.07  | 1.28        | 183   | Cn B   |        |        |        |        |        |
| 4  | s:   | 1.17  | 1.28        | 184   | Fn     |        |        |        |        |        |
| 5  | s:   | 1.43  | 1.28        | 185   | F2     |        |        |        |        |        |
| 6  | s:   | 4.58  | 1.28        | 184   | An     |        |        |        |        |        |
| 7  | s:   | 5.14  | 1.28        | 185   | A3     |        |        |        |        |        |
| 8  | s:   | 5.75  | 1.28        | 185   | A2     |        |        |        |        |        |
| 9  | s:   | 7.83  | 1.28        | 185   | F1     |        |        |        |        |        |
| 10 | s:   | 15.04 | 1.28        | 185   | R3     |        |        |        |        |        |
| 11 | s:   | 17.03 | 1.28        | 185   | D1F    |        |        |        |        |        |
| 12 | s:   | 18.59 | 1.28        | 185   | D3F    |        |        |        |        |        |
| 13 | s:   | 19.33 | 1.28        | 185   | D3     |        |        |        |        |        |
| 14 | s:   | 21.03 | 1.28        | 185   | R2     |        |        |        |        |        |
| 15 | s:   | 29.52 | 1.28        | 185   | D4     |        |        |        |        |        |
| 16 | s:   | 39.11 | 1.28        | 185   | D2     |        |        |        |        |        |
| 17 | s:   | 60.72 | 1.28        | 185   | D1     |        |        |        |        |        |

# Sample 11 / cycle 9 / Fn

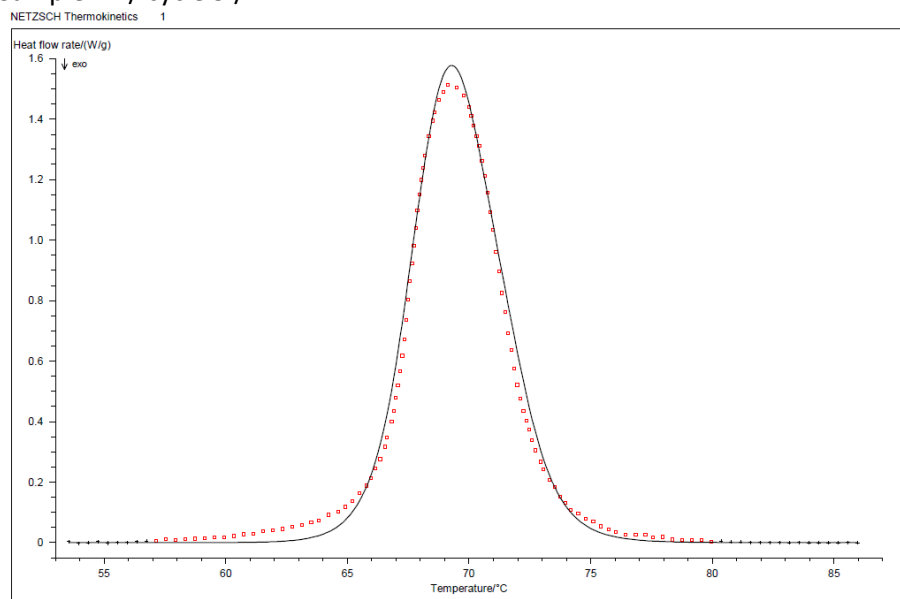

## NETZSCH Thermokinetics

Date/Time: 30.11.2016 at 14:27

Project: 1

Model 1: n-th order

A—1→B

Start evaluation:

0.00050

Measurement type:

DSC

Fine evaluation:

0.99950

SCAN 1

Identity:

OP320 27.04.2016 15:44:57/Segm.S1/2

Transfer Corr:

204 F1.kcr

Min. Temp/°C:

53.5533

Min. Time/min:

0.0

Max. Temp/°C:

85.9643

Max. Time/min:

3.6271

Heating rate/(K/min):

8.936

Sampling time/s:

0.672

Sample mass/mg:

3.770

Base line type:

LeftPts: 80

RightPts: 20

## PARAMETERS AND STANDARD DEVIATIONS

| # | Parameter              | Initial Val. | Optimum Val. | Minimum | Maximum | Sign | t*Std.Dev. |
|---|------------------------|--------------|--------------|---------|---------|------|------------|
| 0 | log A1/s <sup>-1</sup> | 135.1801     | 156.4270     |         |         |      | 0.2126     |
| 1 | E1 kJ/mol              | 891.9617     | 1030.6636    |         |         | +    | 1.4311     |
| 2 | React.ord. 1           | 1.9448       | 2.2406       |         |         | +    | 6.7675E-2  |
| 3 | Area 1/(J/g)           | 50.4746      | 50.4746      |         |         |      | constant   |

## STATISTICS

Least squares:

5.56186

Number of cycles:

6

Mean of residues:

0.13082

Max.No of cycles:

50

Correlation coefficient:

0.996465

Rel. precision:

0.001000

Durbin-Watson Value:

0.027

t-critical(0.95;227):

1.962

Durbin-Watson Factor:

6.105

## F-TEST ON FIT-QUALITY

| #  | Code | Fexp  | Fcrit(0.95) | f-act | Type 1 | Type 2 | Type 3 | Type 4 | Type 5 | Type 6 |
|----|------|-------|-------------|-------|--------|--------|--------|--------|--------|--------|
| 0  | s:   | 1.00  | 1.25        | 228   | B1     |        |        |        |        |        |
| 1  | s:   | 1.01  | 1.25        | 227   | C1 B   |        |        |        |        |        |
| 2  | s:   | 1.08  | 1.25        | 226   | Cn B   |        |        |        |        |        |
| 3  | s:   | 1.40  | 1.28        | 162   | Bna    |        |        |        |        |        |
| 4  | s:   | 1.44  | 1.25        | 227   | Fn     |        |        |        |        |        |
| 5  | s:   | 1.55  | 1.25        | 228   | F2     |        |        |        |        |        |
| 6  | s:   | 4.43  | 1.25        | 227   | An     |        |        |        |        |        |
| 7  | s:   | 4.90  | 1.25        | 228   | A3     |        |        |        |        |        |
| 8  | s:   | 5.42  | 1.25        | 228   | A2     |        |        |        |        |        |
| 9  | s:   | 7.25  | 1.25        | 228   | F1     |        |        |        |        |        |
| 10 | s:   | 14.15 | 1.25        | 228   | R3     |        |        |        |        |        |
| 11 | s:   | 15.48 | 1.25        | 228   | D1F    |        |        |        |        |        |
| 12 | s:   | 17.14 | 1.25        | 228   | D3F    |        |        |        |        |        |
| 13 | s:   | 17.96 | 1.25        | 228   | D3     |        |        |        |        |        |
| 14 | s:   | 19.80 | 1.25        | 228   | R2     |        |        |        |        |        |
| 15 | s:   | 28.14 | 1.25        | 228   | D4     |        |        |        |        |        |
| 16 | s:   | 36.89 | 1.25        | 228   | D2     |        |        |        |        |        |
| 17 | s:   | 57.73 | 1.25        | 228   | D1     |        |        |        |        |        |

# Sample 11 / cycle 10 / Fn

NETZSCH Thermokinetics 1

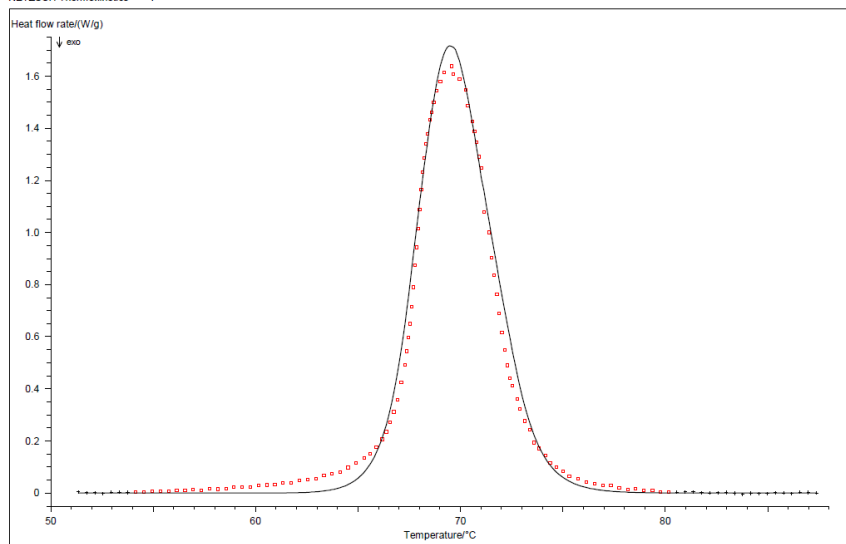

## NETZSCH Thermokinetics

Date/Time: 30.11.2016 at 14:43

Project: 1

Model 1: n-th order

A—1→B

Start evaluation: 0.00050

Measurement type: DSC

Fine evaluation: 0.99950

SCAN 1

Identity:

OP320 27.04.2016 17:04:37/Segm.S2/3

Transfer Corr: 204 F1.kcr

Min. Temp/°C: 51.3537

Min. Time/min: 0.0

Max. Temp/°C: 87.3781

Max. Time/min: 4.0164

Heating rate/(K/min): 8.969

Sampling time/s: 0.669

Sample mass/mg: 3.770

Base line type:

LeftPts: 120

RightPts: 50

## PARAMETERS AND STANDARD DEVIATIONS

| # | Parameter              | Initial Val. | Optimum Val. | Minimum | Maximum | Sign | t*Std.Dev. |
|---|------------------------|--------------|--------------|---------|---------|------|------------|
| 0 | log A1/s <sup>-1</sup> | 165.4667     | 165.4662     |         |         |      | 2.9871E-2  |
| 1 | E1 kJ/mol              | 1090.3762    | 1090.3729    |         |         | +    | 0.2511     |
| 2 | React.ord. 1           | 2.3234       | 2.3233       |         |         | +    | 8.7277E-2  |
| 3 | Area 1/(J/g)           | 53.8953      | 53.8953      |         |         |      | constant   |

## STATISTICS

Least squares: 9.58381

Number of cycles: 4

Mean of residues: 0.16294

Max.No of cycles: 50

Correlation coefficient: 0.994427

Rel. precision: 0.001000

Durbin-Watson Value: 0.063

t-critical(0.95;262): 1.960

Durbin-Watson Factor: 4.022

## F-TEST ON FIT-QUALITY

| #  | Code | Fexp    | Fcrit(0.95) | f-act | Type 1 | Type 2 | Type 3 | Type 4 | Type 5 | Type 6 |
|----|------|---------|-------------|-------|--------|--------|--------|--------|--------|--------|
| 0  | s:   | 1.00    | 1.23        | 261   | Cn B   |        |        |        |        |        |
| 1  | s:   | 1.08    | 1.23        | 263   | B1     |        |        |        |        |        |
| 2  | s:   | 1.09    | 1.23        | 262   | C1 B   |        |        |        |        |        |
| 3  | s:   | 1.58    | 1.23        | 262   | Fn     |        |        |        |        |        |
| 4  | s:   | 1.69    | 1.23        | 263   | F2     |        |        |        |        |        |
| 5  | s:   | 3.46    | 1.23        | 262   | An     |        |        |        |        |        |
| 6  | s:   | 4.01    | 1.23        | 263   | A2     |        |        |        |        |        |
| 7  | s:   | 5.38    | 1.23        | 263   | F1     |        |        |        |        |        |
| 8  | s:   | 6.01    | 1.23        | 263   | A3     |        |        |        |        |        |
| 9  | s:   | 9.68    | 1.23        | 263   | R3     |        |        |        |        |        |
| 10 | s:   | 10.63   | 1.23        | 263   | D1F    |        |        |        |        |        |
| 11 | s:   | 11.95   | 1.23        | 263   | D3F    |        |        |        |        |        |
| 12 | s:   | 12.53   | 1.23        | 263   | D3     |        |        |        |        |        |
| 13 | s:   | 13.22   | 1.23        | 263   | R2     |        |        |        |        |        |
| 14 | s:   | 19.13   | 1.23        | 263   | D4     |        |        |        |        |        |
| 15 | s:   | 25.87   | 1.23        | 263   | D2     |        |        |        |        |        |
| 16 | s:   | 38.28   | 1.23        | 263   | D1     |        |        |        |        |        |
| 17 | s:   | 2452.59 | 1.23        | 261   | Bna    |        |        |        |        |        |

# Sample 11 / cycle 11 / Fn

NETZSCH Thermokinetics 1

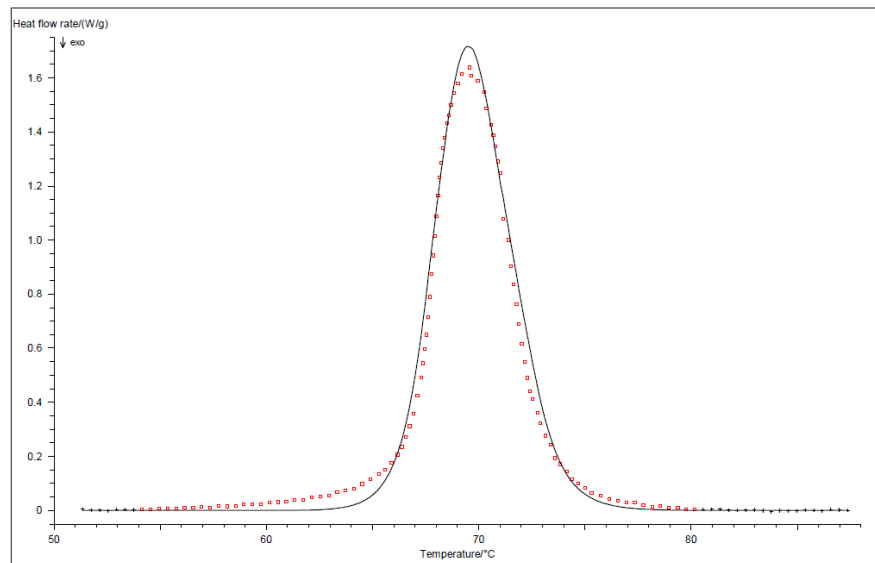

NETZSCH Thermokinetics

Date/Time: 30.11.2016 at 14:45

Project: 1

Model 1: n-th order

A—1→B

Start evaluation: 0.00050

Measurement type: DSC

Fine evaluation: 0.99950

SCAN 1 Identity:

OP320 27.04.2016 17:04:37/Segm.S2/3

Transfer Corr: 204 F1.kcr

Min. Temp°C: 51.3537

Min. Time/min: 0.0

Max. Temp°C: 87.3781

Max. Time/min: 4.0164

Heating rate/(K/min): 8.969

Sampling time/s: 0.669

Sample mass/mg: 3.770

LeftPts: 120 RightPts: 50

## PARAMETERS AND STANDARD DEVIATIONS

| # | Parameter              | Initial Val. | Optimum Val. | Minimum | Maximum | Sign | t*Std.Dev. |
|---|------------------------|--------------|--------------|---------|---------|------|------------|
| 0 | log A1/s <sup>-1</sup> | 133.0351     | 165.4667     |         |         |      | 0.5872     |
| 1 | E1 kJ/mol              | 878.5152     | 1090.3762    |         |         | +    | 3.8806     |
| 2 | React.ord. 1           | 1.8725       | 2.3234       |         |         | +    | 7.5052E-2  |
| 3 | Area 1/(J/g)           | 53.8953      | 53.8953      |         |         |      | constant   |

## STATISTICS

Least squares: 9.58381

Number of cycles: 11

Mean of residues: 0.16294

Max.No of cycles: 50

Correlation coefficient: 0.994427

Rel. precision: 0.001000

Durbin-Watson Value: 0.063

t-critical(0.95;262): 1.960

Durbin-Watson Factor: 4.022

## F-TEST ON FIT-QUALITY

| #  | Code | Fexp    | Fcrit(0.95) | f-act | Type 1 | Type 2 | Type 3 | Type 4 | Type 5 | Type 6 |
|----|------|---------|-------------|-------|--------|--------|--------|--------|--------|--------|
| 0  | s:   | 1.00    | 1.23        | 261   | Cn B   |        |        |        |        |        |
| 1  | s:   | 1.08    | 1.23        | 263   | B1     |        |        |        |        |        |
| 2  | s:   | 1.09    | 1.23        | 262   | C1 B   |        |        |        |        |        |
| 3  | s:   | 1.58    | 1.23        | 262   | Fn     |        |        |        |        |        |
| 4  | s:   | 1.69    | 1.23        | 263   | F2     |        |        |        |        |        |
| 5  | s:   | 3.46    | 1.23        | 262   | An     |        |        |        |        |        |
| 6  | s:   | 4.01    | 1.23        | 263   | A2     |        |        |        |        |        |
| 7  | s:   | 5.38    | 1.23        | 263   | F1     |        |        |        |        |        |
| 8  | s:   | 6.01    | 1.23        | 263   | A3     |        |        |        |        |        |
| 9  | s:   | 9.68    | 1.23        | 263   | R3     |        |        |        |        |        |
| 10 | s:   | 10.63   | 1.23        | 263   | D1F    |        |        |        |        |        |
| 11 | s:   | 11.95   | 1.23        | 263   | D3F    |        |        |        |        |        |
| 12 | s:   | 12.53   | 1.23        | 263   | D3     |        |        |        |        |        |
| 13 | s:   | 13.22   | 1.23        | 263   | R2     |        |        |        |        |        |
| 14 | s:   | 19.13   | 1.23        | 263   | D4     |        |        |        |        |        |
| 15 | s:   | 25.87   | 1.23        | 263   | D2     |        |        |        |        |        |
| 16 | s:   | 38.28   | 1.23        | 263   | D1     |        |        |        |        |        |
| 17 | s:   | 2452.59 | 1.23        | 261   | Bna    |        |        |        |        |        |

# Sample 11 / cycle 12 / Fn

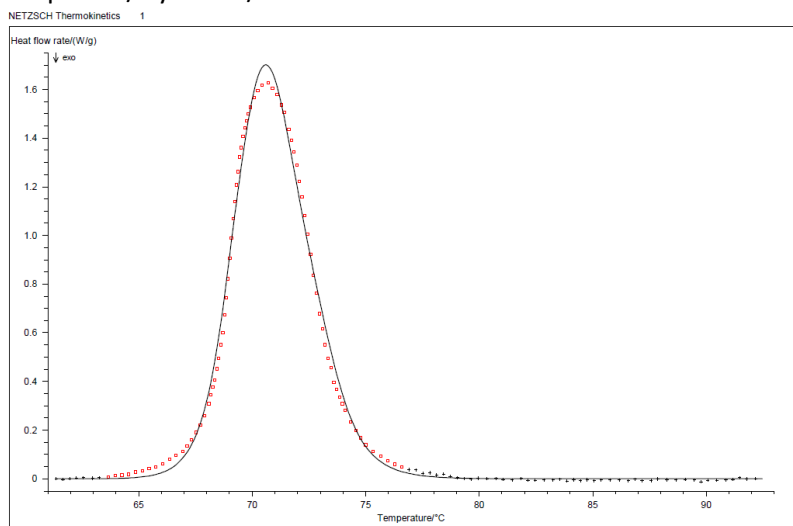

## NETZSCH Thermokinetics

Date/Time: 30.11.2016 at 14:48

Project: 1  
Model 1: n-th order

A—1→B

Start evaluation: 0.00050  
Fine evaluation: 0.99950  
SCAN 1 Identity: 204 F1.kcr  
Transfer Corr: 61.3647  
Min. Temp/°C: 92.4703  
Max. Temp/°C: 8.986  
Heating rate/(K/min): 3.770  
Sample mass/mg: Base line type:  
Measurement type: DSC  
OP320 28.04.2016 12:45:11/Segm.S2/3  
Min. Time/min: 0.0  
Max. Time/min: 3.4614  
Sampling time/s: 0.670  
LeftPts: 10 RightPts: 50

## PARAMETERS AND STANDARD DEVIATIONS

| # | Parameter              | Initial Val. | Optimum Val. | Minimum | Maximum | Sign | t*Std.Dev. |
|---|------------------------|--------------|--------------|---------|---------|------|------------|
| 0 | log A1/s <sup>-1</sup> | 125.7539     | 192.0209     |         |         |      | 1.9415E-2  |
| 1 | E1 kJ/mol              | 833.8036     | 1268.1077    |         |         | +    | 0.2644     |
| 2 | React.ord. 1           | 1.6629       | 2.5028       |         |         | +    | 0.1340     |
| 3 | Area 1/(J/g)           | 48.8046      | 48.8046      |         |         |      | constant   |

## STATISTICS

Least squares: 4.04275  
Mean of residues: 0.11401  
Correlation coefficient: 0.997146  
Durbin-Watson Value: 0.060  
Durbin-Watson Factor: 4.122  
Number of cycles: 21  
Max.No of cycles: 50  
Rel. precision: 0.001000  
t-critical(0.95;132): 1.969

## F-TEST ON FIT-QUALITY

| #  | Code | Fexp    | Fcrit(0.95) | f-act | Type 1 | Type 2 | Type 3 | Type 4 | Type 5 | Type 6 |
|----|------|---------|-------------|-------|--------|--------|--------|--------|--------|--------|
| 0  | s:   | 1.00    | 1.33        | 132   | Fn     |        |        |        |        |        |
| 1  | s:   | 1.38    | 1.34        | 131   | Cn B   |        |        |        |        |        |
| 2  | s:   | 1.45    | 1.33        | 133   | F2     |        |        |        |        |        |
| 3  | s:   | 1.47    | 1.33        | 132   | C1 B   |        |        |        |        |        |
| 4  | s:   | 2.55    | 1.33        | 133   | B1     |        |        |        |        |        |
| 5  | s:   | 3.37    | 1.33        | 132   | An     |        |        |        |        |        |
| 6  | s:   | 5.06    | 1.33        | 133   | A3     |        |        |        |        |        |
| 7  | s:   | 6.19    | 1.33        | 133   | A2     |        |        |        |        |        |
| 8  | s:   | 9.01    | 1.33        | 133   | F1     |        |        |        |        |        |
| 9  | s:   | 17.21   | 1.33        | 133   | R3     |        |        |        |        |        |
| 10 | s:   | 20.78   | 1.33        | 133   | D1F    |        |        |        |        |        |
| 11 | s:   | 21.92   | 1.33        | 133   | D3F    |        |        |        |        |        |
| 12 | s:   | 22.44   | 1.33        | 133   | D3     |        |        |        |        |        |
| 13 | s:   | 23.74   | 1.33        | 133   | R2     |        |        |        |        |        |
| 14 | s:   | 33.92   | 1.33        | 133   | D4     |        |        |        |        |        |
| 15 | s:   | 45.17   | 1.33        | 133   | D2     |        |        |        |        |        |
| 16 | s:   | 68.19   | 1.33        | 133   | D1     |        |        |        |        |        |
| 17 | s:   | 1856.75 | 1.28        | 261   | Bna    |        |        |        |        |        |

## Sample 11 / cycle 13 / Fn

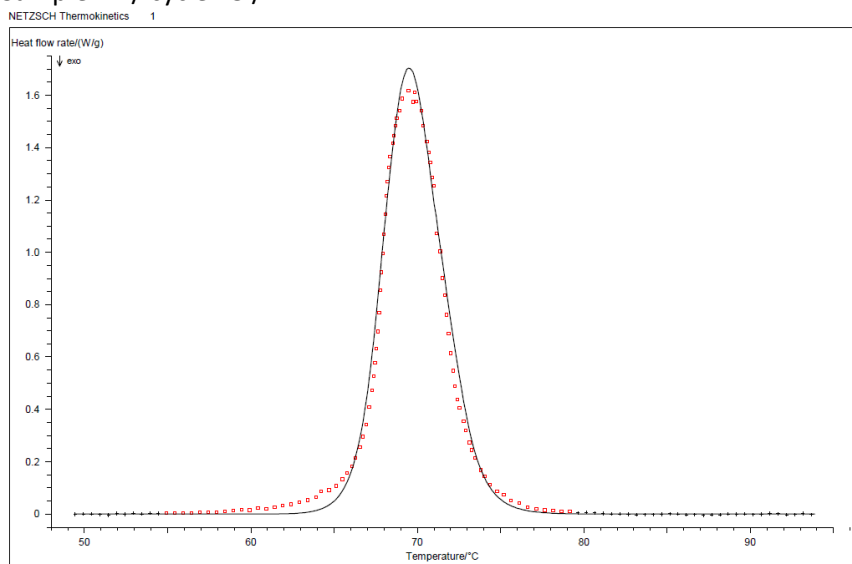

## NETZSCH Thermokinetics

Date/Time: 30.11.2016 at 15:02

Project: 1  
Model 1: n-th order

A—1→B

Start evaluation: 0.00050

Measurement type: DSC

Fine evaluation: 0.99950

SCAN 1

Identity:

OP320 27.04.2016 17:04:37/Segm.S2/3

Transfer Corr: 204 F1.kcr

Min. Temp/°C: 49.4455

Min. Time/min: 0.0

Max. Temp/°C: 93.8708

Max. Time/min: 4.9533

Heating rate/(K/min): 8.969

Sampling time/s: 0.669

Sample mass/mg: 3.770

LeftPts: 20

RightPts: 50

## PARAMETERS AND STANDARD DEVIATIONS

| # | Parameter              | Initial Val. | Optimum Val. | Minimum | Maximum | Sign | t*Std.Dev. |
|---|------------------------|--------------|--------------|---------|---------|------|------------|
| 0 | log A1/s <sup>-1</sup> | 170.2299     | 170.1915     |         |         |      | 4.9039E-2  |
| 1 | E1 kJ/mol              | 1121.5213    | 1121.2698    |         |         | +    | 0.3605     |
| 2 | React.ord. 1           | 2.3538       | 2.3530       |         |         | +    | 7.2426E-2  |
| 3 | Area 1/(J/g)           | 52.4495      | 52.4495      |         |         |      | constant   |

## STATISTICS

Least squares: 5.79244

Number of cycles: 2

Mean of residues: 0.11409

Max.No of cycles: 50

Correlation coefficient: 0.995732

Rel. precision: 0.001000

Durbin-Watson Value: 0.093

t-critical(0.95;246): 1.961

Durbin-Watson Factor: 3.312

## F-TEST ON FIT-QUALITY

| #  | Code | Fexp    | Fcrit(0.95) | f-act | Type 1 | Type 2 | Type 3 | Type 4 | Type 5 | Type 6 |
|----|------|---------|-------------|-------|--------|--------|--------|--------|--------|--------|
| 0  | s:   | 1.00    | 1.24        | 245   | Cn B   |        |        |        |        |        |
| 1  | s:   | 1.02    | 1.24        | 247   | B1     |        |        |        |        |        |
| 2  | s:   | 1.04    | 1.24        | 246   | C1 B   |        |        |        |        |        |
| 3  | s:   | 1.25    | 1.24        | 246   | Fn     |        |        |        |        |        |
| 4  | s:   | 1.40    | 1.24        | 247   | F2     |        |        |        |        |        |
| 5  | s:   | 3.64    | 1.24        | 246   | An     |        |        |        |        |        |
| 6  | s:   | 3.72    | 1.24        | 247   | A3     |        |        |        |        |        |
| 7  | s:   | 4.05    | 1.24        | 247   | A2     |        |        |        |        |        |
| 8  | s:   | 5.47    | 1.24        | 247   | F1     |        |        |        |        |        |
| 9  | s:   | 10.14   | 1.24        | 247   | R3     |        |        |        |        |        |
| 10 | s:   | 11.51   | 1.24        | 247   | D1F    |        |        |        |        |        |
| 11 | s:   | 12.64   | 1.24        | 247   | D3F    |        |        |        |        |        |
| 12 | s:   | 13.16   | 1.24        | 247   | D3     |        |        |        |        |        |
| 13 | s:   | 13.97   | 1.24        | 247   | R2     |        |        |        |        |        |
| 14 | s:   | 20.19   | 1.24        | 247   | D4     |        |        |        |        |        |
| 15 | s:   | 26.71   | 1.24        | 247   | D2     |        |        |        |        |        |
| 16 | s:   | 41.24   | 1.24        | 247   | D1     |        |        |        |        |        |
| 17 | s:   | 3029.18 | 1.23        | 261   | Bna    |        |        |        |        |        |

# Sample 11 / cycle 14 / Fn

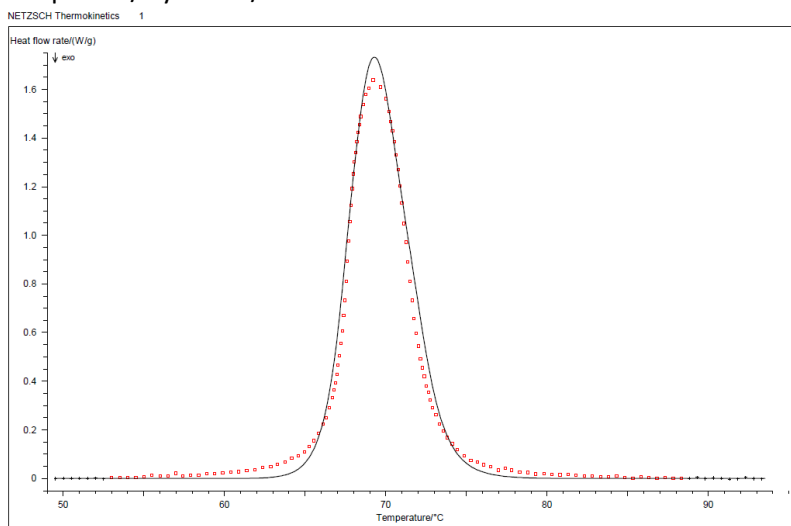

## NETZSCH Thermokinetics

Date/Time: 30.11.2016 at 15:09

Project: 1  
Model 1: n-th order

A—1→B

Start evaluation: 0.00050 Measurement type: DSC  
Fine evaluation: 0.99950  
SCAN 1 Identity: OP320 27.04.2016 17:44:40/Segm.S2/3  
Transfer Corr: 204 F1.kcr  
Min. Temp/°C: 49.5091 Min. Time/min: 0.0  
Max. Temp/°C: 93.5203 Max. Time/min: 4.9104  
Heating rate/(K/min): 8.963 Sampling time/s: 0.670  
Sample mass/mg: 3.770  
Base line type: tangent area prop. LeftPts: 10 RightPts: 10

## PARAMETERS AND STANDARD DEVIATIONS

| # | Parameter              | Initial Val. | Optimum Val. | Minimum | Maximum | Sign | t*Std.Dev. |
|---|------------------------|--------------|--------------|---------|---------|------|------------|
| 0 | log A1/s <sup>-1</sup> | 172.0402     | 172.0402     |         |         |      | 1.8948E-2  |
| 1 | E1 kJ/mol              | 1132.6281    | 1132.6281    |         |         | +    | 0.2282     |
| 2 | React.ord. 1           | 2.4906       | 2.4906       |         |         | +    | 0.1142     |
| 3 | Area 1/(J/g)           | 54.8202      | 54.8202      |         |         |      | constant   |

## STATISTICS

Least squares: 8.71146 Number of cycles: 14  
Mean of residues: 0.14055 Max.No of cycles: 50  
Correlation coefficient: 0.994406 Rel. precision: 0.001000  
Durbin-Watson Value: 0.027 t-critical(0.95;358): 1.958  
Durbin-Watson Factor: 6.099

## F-TEST ON FIT-QUALITY

| #  | Code | Fexp    | Fcrit(0.95) | f-act | Type 1 | Type 2 | Type 3 | Type 4 | Type 5 | Type 6 |
|----|------|---------|-------------|-------|--------|--------|--------|--------|--------|--------|
| 0  | s:   | 1.00    | 1.19        | 357   | Cn B   |        |        |        |        |        |
| 1  | s:   | 1.17    | 1.19        | 359   | B1     |        |        |        |        |        |
| 2  | s:   | 1.22    | 1.19        | 358   | C1 B   |        |        |        |        |        |
| 3  | s:   | 1.60    | 1.19        | 358   | Fn     |        |        |        |        |        |
| 4  | s:   | 1.83    | 1.19        | 359   | F2     |        |        |        |        |        |
| 5  | s:   | 3.80    | 1.19        | 358   | An     |        |        |        |        |        |
| 6  | s:   | 3.94    | 1.19        | 359   | A3     |        |        |        |        |        |
| 7  | s:   | 4.29    | 1.19        | 359   | A2     |        |        |        |        |        |
| 8  | s:   | 5.64    | 1.19        | 359   | F1     |        |        |        |        |        |
| 9  | s:   | 9.81    | 1.19        | 359   | R3     |        |        |        |        |        |
| 10 | s:   | 10.61   | 1.19        | 359   | D1F    |        |        |        |        |        |
| 11 | s:   | 11.93   | 1.19        | 359   | D3F    |        |        |        |        |        |
| 12 | s:   | 12.53   | 1.19        | 359   | D3     |        |        |        |        |        |
| 13 | s:   | 13.17   | 1.19        | 359   | R2     |        |        |        |        |        |
| 14 | s:   | 18.63   | 1.19        | 359   | D4     |        |        |        |        |        |
| 15 | s:   | 24.76   | 1.19        | 359   | D2     |        |        |        |        |        |
| 16 | s:   | 36.15   | 1.19        | 359   | D1     |        |        |        |        |        |
| 17 | s:   | 3746.33 | 1.21        | 261   | Bna    |        |        |        |        |        |

# Sample 11 / cycle 15 / Fn

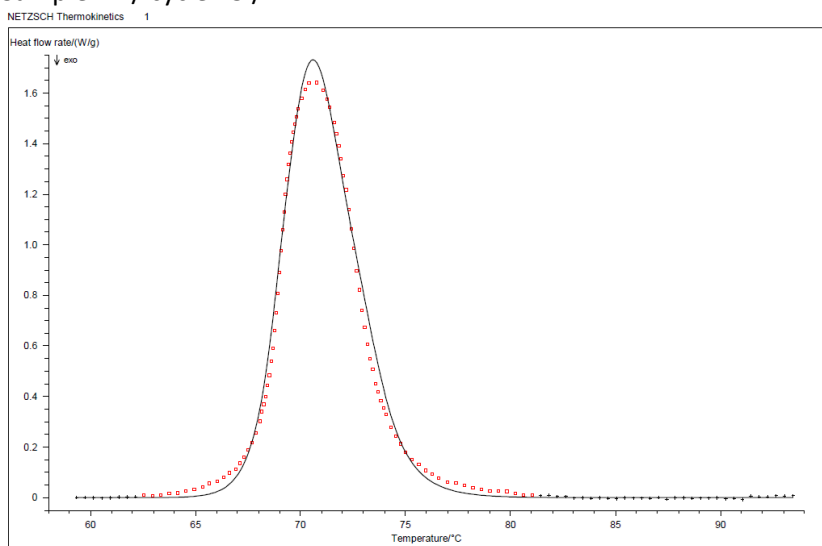

## NETZSCH Thermokinetics

Date/Time: 30.11.2016 at 15:13

Project: 1  
Model 1: n-th order

A—1→B

Start evaluation: 0.00050  
Fine evaluation: 0.99950  
SCAN 1 Identity: 204 F1.kcr  
Transfer Corr: 59.3390  
Min. Temp/°C: 93.4503  
Max. Temp/°C: 8.985  
Heating rate/(K/min): 3.770  
Sample mass/mg: tangent area prop.  
Base line type: LeftPts: 15 RightPts: 113

Measurement type: DSC  
OP320 28.04.2016 12:45:11/Segm.S2/3  
Min. Time/min: 0.0  
Max. Time/min: 3.7967  
Sampling time/s: 0.670

## PARAMETERS AND STANDARD DEVIATIONS

| # | Parameter              | Initial Val. | Optimum Val. | Minimum | Maximum | Sign | t*Std.Dev. |
|---|------------------------|--------------|--------------|---------|---------|------|------------|
| 0 | log A1/s <sup>-1</sup> | 146.8558     | 197.8545     |         |         |      | 0.1212     |
| 1 | E1 kJ/mol              | 972.0876     | 1306.3093    |         |         | +    | 0.8383     |
| 2 | React.ord. 1           | 2.1064       | 2.7619       |         |         | +    | 7.7462E-2  |
| 3 | Area 1/(J/g)           | 51.5313      | 51.5313      |         |         |      | constant   |

## STATISTICS

Least squares: 5.42073  
Mean of residues: 0.12608  
Correlation coefficient: 0.996655  
Durbin-Watson Value: 0.044  
Durbin-Watson Factor: 4.802

Number of cycles: 8  
Max.No of cycles: 50  
Rel. precision: 0.001000  
t-critical(0.95;187): 1.964

## F-TEST ON FIT-QUALITY

| #  | Code | Fexp    | Fcrit(0.95) | f-act | Type 1 | Type 2 | Type 3 | Type 4 | Type 5 | Type 6 |
|----|------|---------|-------------|-------|--------|--------|--------|--------|--------|--------|
| 0  | s:   | 1.00    | 1.28        | 186   | Cn B   |        |        |        |        |        |
| 1  | s:   | 1.04    | 1.27        | 187   | Fn     |        |        |        |        |        |
| 2  | s:   | 1.07    | 1.27        | 188   | B1     |        |        |        |        |        |
| 3  | s:   | 1.09    | 1.27        | 187   | C1 B   |        |        |        |        |        |
| 4  | s:   | 1.71    | 1.27        | 188   | F2     |        |        |        |        |        |
| 5  | s:   | 4.16    | 1.27        | 187   | An     |        |        |        |        |        |
| 6  | s:   | 5.82    | 1.27        | 188   | A2     |        |        |        |        |        |
| 7  | s:   | 7.91    | 1.27        | 188   | F1     |        |        |        |        |        |
| 8  | s:   | 14.10   | 1.27        | 188   | R3     |        |        |        |        |        |
| 9  | s:   | 16.20   | 1.27        | 188   | D1F    |        |        |        |        |        |
| 10 | s:   | 17.49   | 1.27        | 188   | D3F    |        |        |        |        |        |
| 11 | s:   | 18.07   | 1.27        | 188   | D3     |        |        |        |        |        |
| 12 | s:   | 18.95   | 1.27        | 188   | R2     |        |        |        |        |        |
| 13 | s:   | 27.01   | 1.27        | 188   | D4     |        |        |        |        |        |
| 14 | s:   | 33.59   | 1.27        | 188   | D2     |        |        |        |        |        |
| 15 | s:   | 40.37   | 1.27        | 188   | A3     |        |        |        |        |        |
| 16 | s:   | 50.67   | 1.27        | 188   | D1     |        |        |        |        |        |
| 17 | s:   | 2048.47 | 1.25        | 261   | Bna    |        |        |        |        |        |

# Sample 11 / cycle 16 / Fn

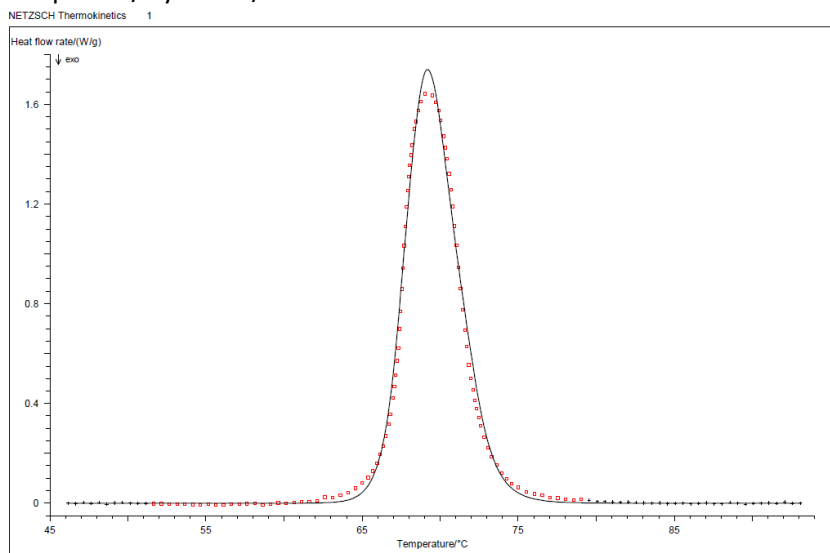

## NETZSCH Thermokinetics

Date/Time: 30.11.2016 at 15:20

Project: 1

Model 1: n-th order

A—1→B

Start evaluation: 0.00050 Measurement type: DSC

Fine evaluation: 0.99950

SCAN 1 Identity: OP320 28.04.2016 13:26:28/Segm.S2/3

Transfer Corr: 204 F1.kcr

Min. Temp/°C: 46.1494 Min. Time/min: 0.0

Max. Temp/°C: 93.1656 Max. Time/min: 5.2446

Heating rate/(K/min): 8.965 Sampling time/s: 0.670

Sample mass/mg: 3.770

Base line type: tangent area prop. LeftPts: 10 RightPts: 11

## PARAMETERS AND STANDARD DEVIATIONS

| # | Parameter              | Initial Val. | Optimum Val. | Minimum | Maximum | Sign | t*Std.Dev. |
|---|------------------------|--------------|--------------|---------|---------|------|------------|
| 0 | log A1/s <sup>-1</sup> | 132.5011     | 192.8504     |         |         |      | 1.5159E-2  |
| 1 | E1 kJ/mol              | 874.3818     | 1268.3211    |         |         | +    | 0.1993     |
| 2 | React.ord. 1           | 1.8602       | 2.5705       |         |         | +    | 0.1021     |
| 3 | Area 1/(J/g)           | 50.5800      | 50.5800      |         |         |      | constant   |

## STATISTICS

|                          |            |                       |          |
|--------------------------|------------|-----------------------|----------|
| Least squares:           | 3.76645    | Number of cycles:     | 23       |
| Mean of residues:        | 8.94244E-2 | Max.No of cycles:     | 50       |
| Correlation coefficient: | 0.997307   | Rel. precision:       | 0.001000 |
| Durbin-Watson Value:     | 0.059      | t-critical(0.95;276): | 1.960    |
| Durbin-Watson Factor:    | 4.131      |                       |          |

## F-TEST ON FIT-QUALITY

| #  | Code | Fexp    | Fcrit(0.95) | f-act | Type 1 | Type 2 | Type 3 | Type 4 | Type 5 | Type 6 |
|----|------|---------|-------------|-------|--------|--------|--------|--------|--------|--------|
| 0  | s:   | 1.00    | 1.22        | 276   | Fn     |        |        |        |        |        |
| 1  | s:   | 1.41    | 1.22        | 277   | F2     |        |        |        |        |        |
| 2  | s:   | 1.43    | 1.22        | 275   | Cn B   |        |        |        |        |        |
| 3  | s:   | 1.65    | 1.22        | 276   | C1 B   |        |        |        |        |        |
| 4  | s:   | 4.86    | 1.22        | 276   | An     |        |        |        |        |        |
| 5  | s:   | 4.86    | 1.22        | 277   | A3     |        |        |        |        |        |
| 6  | s:   | 5.20    | 1.22        | 277   | A2     |        |        |        |        |        |
| 7  | s:   | 7.05    | 1.22        | 277   | F1     |        |        |        |        |        |
| 8  | s:   | 13.07   | 1.22        | 277   | R3     |        |        |        |        |        |
| 9  | s:   | 15.74   | 1.22        | 277   | D1F    |        |        |        |        |        |
| 10 | s:   | 16.64   | 1.22        | 277   | D3F    |        |        |        |        |        |
| 11 | s:   | 17.04   | 1.22        | 277   | D3     |        |        |        |        |        |
| 12 | s:   | 17.98   | 1.22        | 277   | R2     |        |        |        |        |        |
| 13 | s:   | 25.59   | 1.22        | 277   | D4     |        |        |        |        |        |
| 14 | s:   | 26.50   | 1.22        | 277   | B1     |        |        |        |        |        |
| 15 | s:   | 35.94   | 1.22        | 277   | D2     |        |        |        |        |        |
| 16 | s:   | 54.49   | 1.22        | 277   | D1     |        |        |        |        |        |
| 17 | s:   | 4167.09 | 1.22        | 261   | Bna    |        |        |        |        |        |

## Sample 11 / cycle 17 / Fn

NETZSCH Thermokinetics

Date/Time: 30.11.2016 at 15:22

Project: 1

Model 1: n-th order

A—1→B

Start evaluation:

0.00050

Measurement type:

DSC

Fine evaluation:

0.99950

SCAN 1

Identity:

204 F1.kcr

OP320 28.04.2016 16:37:10/Segm.S1/2

Transfer Corr:

57.8795

Min. Time/min:

0.0

Min. Temp/°C:

90.0545

Max. Time/min:

3.5880

Max. Temp/°C:

8.967

Sampling time/s:

0.671

Heating rate/(K/min):

3.770

Sample mass/mg:

tangent area prop.

LeftPts: 20

RightPts: 50

## PARAMETERS AND STANDARD DEVIATIONS

| # | Parameter              | Initial Val. | Optimum Val. | Minimum | Maximum | Sign | t*Std.Dev. |
|---|------------------------|--------------|--------------|---------|---------|------|------------|
| 0 | log A1/s <sup>-1</sup> | 143.8968     | 196.9185     |         |         |      | 0.2320     |
| 1 | E1 kJ/mol              | 951.0432     | 1297.9341    |         |         | +    | 1.5535     |
| 2 | React.ord. 1           | 2.0501       | 2.7130       |         |         | +    | 6.8979E-2  |
| 3 | Area 1/(J/g)           | 51.0422      | 51.0422      |         |         |      | constant   |

## STATISTICS

Least squares:

5.91356

Number of cycles:

9

Mean of residues:

0.13552

Max.No of cycles:

50

Correlation coefficient:

0.996731

Rel. precision:

0.001000

Durbin-Watson Value:

0.043

t-critical(0.95;212):

1.962

Durbin-Watson Factor:

4.858

## F-TEST ON FIT-QUALITY

| #  | Code | Fexp    | Fcrit(0.95) | f-act | Type 1 | Type 2 | Type 3 | Type 4 | Type 5 | Type 6 |
|----|------|---------|-------------|-------|--------|--------|--------|--------|--------|--------|
| 0  | s:   | 1.00    | 1.26        | 211   | Cn B   |        |        |        |        |        |
| 1  | s:   | 1.04    | 1.26        | 212   | Fn     |        |        |        |        |        |
| 2  | s:   | 1.10    | 1.26        | 212   | C1 B   |        |        |        |        |        |
| 3  | s:   | 1.60    | 1.26        | 213   | F2     |        |        |        |        |        |
| 4  | s:   | 3.07    | 1.26        | 213   | B1     |        |        |        |        |        |
| 5  | s:   | 4.12    | 1.26        | 212   | An     |        |        |        |        |        |
| 6  | s:   | 5.41    | 1.26        | 213   | A2     |        |        |        |        |        |
| 7  | s:   | 7.34    | 1.26        | 213   | F1     |        |        |        |        |        |
| 8  | s:   | 13.17   | 1.26        | 213   | R3     |        |        |        |        |        |
| 9  | s:   | 15.26   | 1.26        | 213   | D1F    |        |        |        |        |        |
| 10 | s:   | 16.46   | 1.26        | 213   | D3F    |        |        |        |        |        |
| 11 | s:   | 16.98   | 1.26        | 213   | D3     |        |        |        |        |        |
| 12 | s:   | 17.78   | 1.26        | 213   | R2     |        |        |        |        |        |
| 13 | s:   | 25.37   | 1.26        | 213   | D4     |        |        |        |        |        |
| 14 | s:   | 31.63   | 1.26        | 213   | D2     |        |        |        |        |        |
| 15 | s:   | 42.18   | 1.26        | 213   | A3     |        |        |        |        |        |
| 16 | s:   | 48.47   | 1.26        | 213   | D1     |        |        |        |        |        |
| 17 | s:   | 2115.15 | 1.24        | 261   | Bna    |        |        |        |        |        |

## Sample 12 / cycle 1 / Fn

NETZSCH Thermokinetics 1

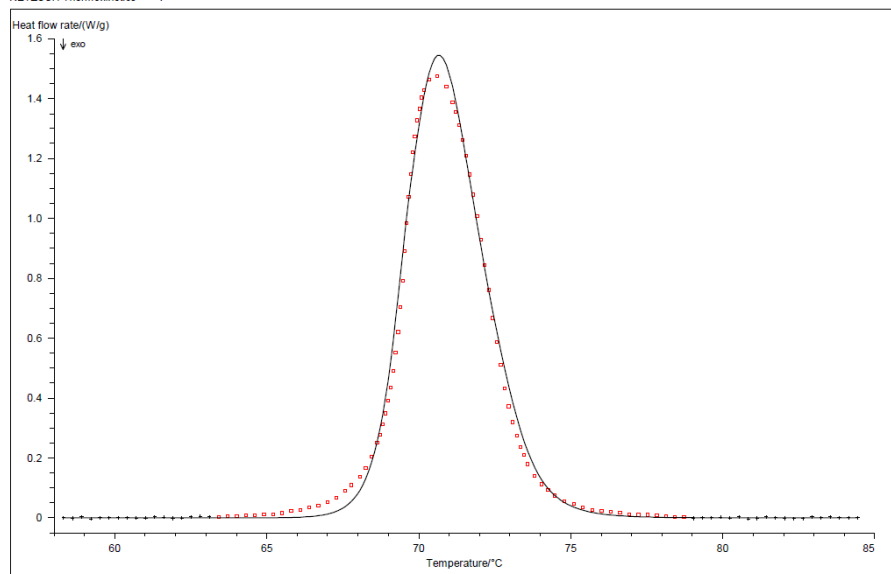

## NETZSCH Thermokinetics

Date/Time: 30.11.2016 at 15:37

Project: 1

Model 1: n-th order

A—1→B

Start evaluation: 0.00050

Measurement type: DSC

Fine evaluation: 0.99950

SCAN 1

Identity:

OP320 08.05.2016 16:43:02/Segm.S2/3

Transfer Corr: 204 F1.kcr

Min. Temp/°C: 58.3092

Min. Time/min: 0.0

Max. Temp/°C: 84.4382

Max. Time/min: 4.3684

Heating rate/(K/min): 5.981

Sampling time/s: 1.004

Sample mass/mg: 3.580

Base line type: tangent area prop.

LeftPts: 40

RightPts: 40

## PARAMETERS AND STANDARD DEVIATIONS

| # | Parameter              | Initial Val. | Optimum Val. | Minimum | Maximum | Sign | t*Std.Dev. |
|---|------------------------|--------------|--------------|---------|---------|------|------------|
| 0 | log A1/s <sup>-1</sup> | 240.0272     | 275.7141     |         |         |      | 8.1325E-2  |
| 1 | E1 kJ/mol              | 1584.5552    | 1818.9149    |         |         | +    | 0.5907     |
| 2 | React.ord. 1           | 2.4714       | 2.7588       |         |         | +    | 8.6118E-2  |
| 3 | Area 1/(J/g)           | 51.2602      | 51.2602      |         |         |      | constant   |

## STATISTICS

Least squares: 3.72775

Number of cycles: 9

Mean of residues: 0.11928

Max.No of cycles: 50

Correlation coefficient: 0.997215

Rel. precision: 0.001000

Durbin-Watson Value: 0.065

t-critical(0.95;153): 1.967

Durbin-Watson Factor: 3.951

## F-TEST ON FIT-QUALITY

| #  | Code | Fexp    | Fcrit(0.95) | f-fact | Type 1 | Type 2 | Type 3 | Type 4 | Type 5 | Type 6 |
|----|------|---------|-------------|--------|--------|--------|--------|--------|--------|--------|
| 0  | s:   | 1.00    | 1.31        | 152    | Cn B   |        |        |        |        |        |
| 1  | s:   | 1.01    | 1.31        | 154    | B1     |        |        |        |        |        |
| 2  | s:   | 1.06    | 1.31        | 153    | Fn     |        |        |        |        |        |
| 3  | s:   | 1.15    | 1.31        | 153    | C1 B   |        |        |        |        |        |
| 4  | s:   | 1.80    | 1.31        | 154    | F2     |        |        |        |        |        |
| 5  | s:   | 4.83    | 1.28        | 212    | An     |        |        |        |        |        |
| 6  | s:   | 5.19    | 1.31        | 154    | A3     |        |        |        |        |        |
| 7  | s:   | 5.92    | 1.31        | 154    | A2     |        |        |        |        |        |
| 8  | s:   | 8.90    | 1.31        | 154    | F1     |        |        |        |        |        |
| 9  | s:   | 16.28   | 1.31        | 154    | R3     |        |        |        |        |        |
| 10 | s:   | 19.45   | 1.31        | 154    | D1F    |        |        |        |        |        |
| 11 | s:   | 21.57   | 1.31        | 154    | D3F    |        |        |        |        |        |
| 12 | s:   | 22.20   | 1.31        | 154    | R2     |        |        |        |        |        |
| 13 | s:   | 22.32   | 1.31        | 154    | D3     |        |        |        |        |        |
| 14 | s:   | 32.38   | 1.31        | 154    | D4     |        |        |        |        |        |
| 15 | s:   | 40.59   | 1.31        | 154    | D2     |        |        |        |        |        |
| 16 | s:   | 62.03   | 1.31        | 154    | D1     |        |        |        |        |        |
| 17 | s:   | 2479.42 | 1.26        | 261    | Bna    |        |        |        |        |        |

## Sample 12 / cycle 2 / Fn

NETZSCH Thermokinetics 1

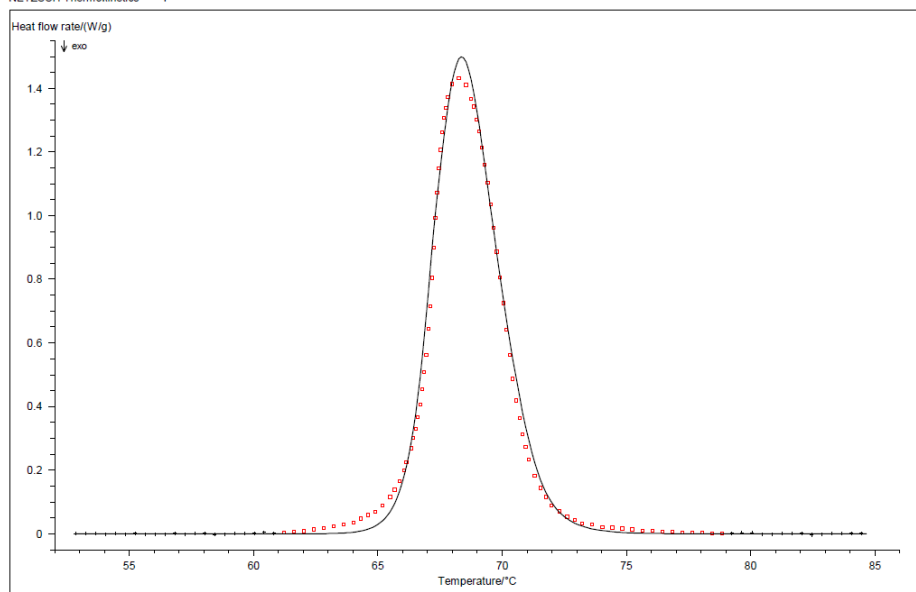

## NETZSCH Thermokinetics

Date/Time: 30.11.2016 at 15:40

Project: 1

Model 1: n-th order

A—1→B

Start evaluation: 0.00050

Measurement type: DSC

Fine evaluation: 0.99950

SCAN 1

Identity:

OP320 08.05.2016 17:31:51/Segm.S2/3

Transfer Corr: 204 F1.kcr

Min. Temp/°C: 52.8310

Min. Time/min: 0.0

Max. Temp/°C: 84.6507

Max. Time/min: 5.3233

Heating rate/(K/min): 5.977

Sampling time/s: 1.004

Sample mass/mg: 3.510

Base line type: tangent area prop.

LeftPts: 25

RightPts: 25

## PARAMETERS AND STANDARD DEVIATIONS

| # | Parameter              | Initial Val. | Optimum Val. | Minimum | Maximum | Sign | t*Std.Dev. |
|---|------------------------|--------------|--------------|---------|---------|------|------------|
| 0 | log A1/s <sup>-1</sup> | 256.0020     | 256.0020     |         |         |      | 2.0582E-2  |
| 1 | E1 kJ/mol              | 1678.2027    | 1678.2027    |         |         | +    | 0.3908     |
| 2 | React.ord. 1           | 2.6590       | 2.6590       |         |         | +    | 0.2007     |
| 3 | Area 1/(J/g)           | 50.9277      | 50.9277      |         |         |      | constant   |

## STATISTICS

Least squares: 3.36762

Number of cycles: 14

Mean of residues: 0.10275

Max.No of cycles: 50

Correlation coefficient: 0.996909

Rel. precision: 0.001000

Durbin-Watson Value: 0.059

t-critical(0.95;174): 1.965

Durbin-Watson Factor: 4.135

## F-TEST ON FIT-QUALITY

| #  | Code | Fexp    | Fcrit(0.95) | f-act | Type 1 | Type 2 | Type 3 | Type 4 | Type 5 | Type 6 |
|----|------|---------|-------------|-------|--------|--------|--------|--------|--------|--------|
| 0  | s:   | 1.00    | 1.28        | 175   | B1     |        |        |        |        |        |
| 1  | s:   | 1.03    | 1.29        | 173   | Cn B   |        |        |        |        |        |
| 2  | s:   | 1.20    | 1.29        | 174   | Fn     |        |        |        |        |        |
| 3  | s:   | 1.30    | 1.29        | 174   | C1 B   |        |        |        |        |        |
| 4  | s:   | 1.77    | 1.28        | 175   | F2     |        |        |        |        |        |
| 5  | s:   | 5.76    | 1.28        | 175   | A2     |        |        |        |        |        |
| 6  | s:   | 8.40    | 1.28        | 175   | F1     |        |        |        |        |        |
| 7  | s:   | 11.49   | 1.28        | 175   | A3     |        |        |        |        |        |
| 8  | s:   | 15.48   | 1.28        | 175   | R3     |        |        |        |        |        |
| 9  | s:   | 18.13   | 1.28        | 175   | D1F    |        |        |        |        |        |
| 10 | s:   | 20.15   | 1.28        | 175   | D3F    |        |        |        |        |        |
| 11 | s:   | 20.87   | 1.28        | 175   | D3     |        |        |        |        |        |
| 12 | s:   | 21.17   | 1.28        | 175   | R2     |        |        |        |        |        |
| 13 | s:   | 31.93   | 1.28        | 175   | D4     |        |        |        |        |        |
| 14 | s:   | 38.47   | 1.28        | 175   | D2     |        |        |        |        |        |
| 15 | s:   | 58.27   | 1.28        | 175   | D1     |        |        |        |        |        |
| 16 | s:   | 210.55  | 1.29        | 174   | An     |        |        |        |        |        |
| 17 | s:   | 3533.72 | 1.25        | 261   | Bna    |        |        |        |        |        |

# Sample 12 / cycle 3 / Fn

NETZSCH Thermokinetics 1

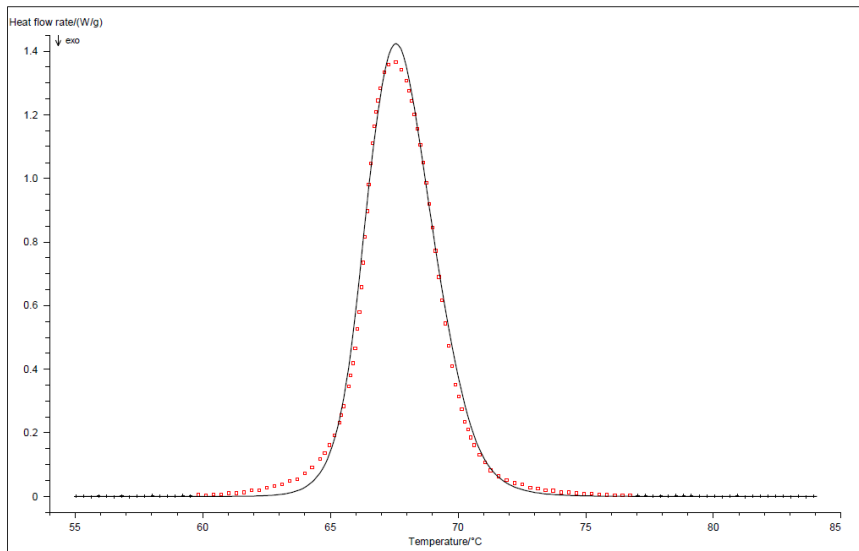

## NETZSCH Thermokinetics

Date/Time: 30.11.2016 at 15:42

Project: 1  
Model: 1: n-th order

A—1→B

Start evaluation: 0.00050 Measurement type: DSC  
Fine evaluation: 0.99950  
SCAN 1 Identity: OP320 08.05.2016 18:14:53/Segm.S2/3  
Transfer Corr: 204 F1.kcr  
Min. Temp/°C: 55.0315 Min. Time/min: 0.0  
Max. Temp/°C: 84.0442 Max. Time/min: 4.8542  
Heating rate/(K/min): 5.977 Sampling time/s: 1.004  
Sample mass/mg: 3.510  
Base line type: tangent area prop. LeftPts: 25 RightPts: 25

## PARAMETERS AND STANDARD DEVIATIONS

| # | Parameter              | Initial Val. | Optimum Val. | Minimum | Maximum | Sign | t*Std.Dev. |
|---|------------------------|--------------|--------------|---------|---------|------|------------|
| 0 | log A1/s <sup>-1</sup> | 236.7421     | 236.7421     |         |         |      | 1.9547E-2  |
| 1 | E1 kJ/mol              | 1548.9595    | 1548.9595    |         |         | +    | 0.3543     |
| 2 | React.ord. 1           | 2.5192       | 2.5192       |         |         | +    | 0.1805     |
| 3 | Area 1/(J/g)           | 49.5824      | 49.5824      |         |         |      | constant   |

## STATISTICS

Least squares: 2.95990 Number of cycles: 14  
Mean of residues: 0.10085 Max.No of cycles: 50  
Correlation coefficient: 0.997280 Rel. precision: 0.001000  
Durbin-Watson Value: 0.057 t-critical(0.95;171): 1.965  
Durbin-Watson Factor: 4.236

## F-TEST ON FIT-QUALITY

| #  | Code | Fexp    | Fcrit(0.95) | f-act | Type 1 | Type 2 | Type 3 | Type 4 | Type 5 | Type 6 |
|----|------|---------|-------------|-------|--------|--------|--------|--------|--------|--------|
| 0  | s:   | 1.00    | 1.29        | 172   | B1     |        |        |        |        |        |
| 1  | s:   | 1.10    | 1.29        | 170   | Cn B   |        |        |        |        |        |
| 2  | s:   | 1.12    | 1.29        | 171   | C1 B   |        |        |        |        |        |
| 3  | s:   | 1.27    | 1.29        | 171   | Fn     |        |        |        |        |        |
| 4  | s:   | 1.75    | 1.29        | 172   | F2     |        |        |        |        |        |
| 5  | s:   | 5.40    | 1.29        | 171   | An     |        |        |        |        |        |
| 6  | s:   | 6.56    | 1.29        | 172   | A2     |        |        |        |        |        |
| 7  | s:   | 9.44    | 1.29        | 172   | F1     |        |        |        |        |        |
| 8  | s:   | 17.94   | 1.29        | 172   | R3     |        |        |        |        |        |
| 9  | s:   | 20.85   | 1.29        | 172   | D1F    |        |        |        |        |        |
| 10 | s:   | 23.03   | 1.29        | 172   | D3F    |        |        |        |        |        |
| 11 | s:   | 23.84   | 1.29        | 172   | D3     |        |        |        |        |        |
| 12 | s:   | 24.80   | 1.29        | 172   | R2     |        |        |        |        |        |
| 13 | s:   | 35.80   | 1.29        | 172   | D4     |        |        |        |        |        |
| 14 | s:   | 45.95   | 1.29        | 172   | D2     |        |        |        |        |        |
| 15 | s:   | 69.70   | 1.29        | 172   | D1     |        |        |        |        |        |
| 16 | s:   | 331.91  | 1.29        | 172   | A3     |        |        |        |        |        |
| 17 | s:   | 4186.85 | 1.25        | 261   | Bna    |        |        |        |        |        |

## Sample 12 / cycle 4 / Fn

NETZSCH Thermokinetics 1

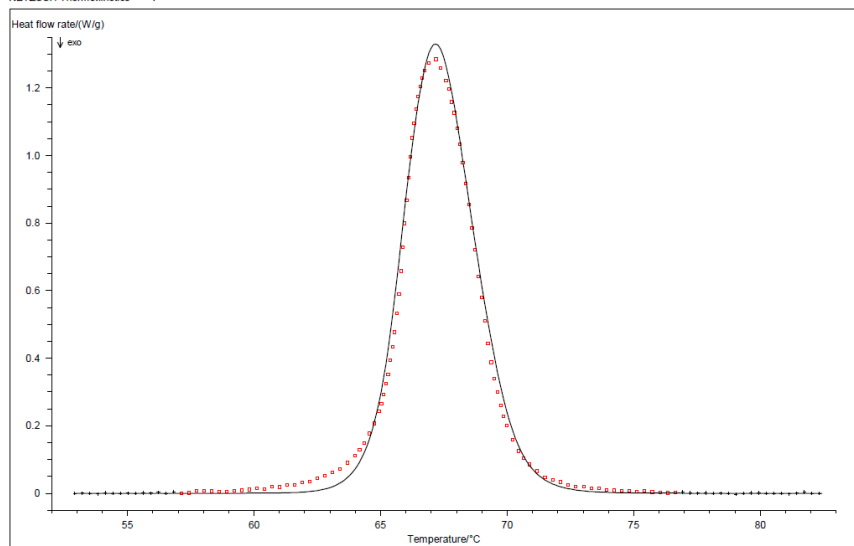

## NETZSCH Thermokinetics

Date/Time: 30.11.2016 at 15:50

Project: 1

Model 1: n-th order

A—1→B

Start evaluation: 0.00050

Measurement type: DSC

Fine evaluation: 0.99950

SCAN 1

Identity:

OP320 08.05.2016 18:56:23/Segm.S2/3

Transfer Corr: 204 F1.kcr

Min. Temp/°C: 52.9259

Min. Time/min: 0.0

Max. Temp/°C: 82.4358

Max. Time/min: 4.9387

Heating rate/(K/min): 5.975

Sampling time/s: 1.004

Sample mass/mg: 3.590

Base line type: tangent area prop.

LeftPts: 25

RightPts: 25

## PARAMETERS AND STANDARD DEVIATIONS

| # | Parameter              | Initial Val. | Optimum Val. | Minimum | Maximum | Sign | t*Std.Dev. |
|---|------------------------|--------------|--------------|---------|---------|------|------------|
| 0 | log A1/s <sup>-1</sup> | 214.3131     | 214.3131     |         |         |      | 1.9397E-2  |
| 1 | E1 kJ/mol              | 1401.4228    | 1401.4228    |         |         | +    | 0.3378     |
| 2 | React.ord. 1           | 2.3296       | 2.3296       |         |         | +    | 0.1687     |
| 3 | Area 1/(J/g)           | 47.8813      | 47.8813      |         |         |      | constant   |

## STATISTICS

Least squares: 2.82774

Number of cycles: 14

Mean of residues: 9.77403E-2

Max.No of cycles: 50

Correlation coefficient: 0.997143

Rel. precision: 0.001000

Durbin-Watson Value: 0.040

t-critical(0.95;195): 1.963

Durbin-Watson Factor: 5.023

## F-TEST ON FIT-QUALITY

| #  | Code | Fexp    | Fcrit(0.95) | f-act | Type 1 | Type 2 | Type 3 | Type 4 | Type 5 | Type 6 |
|----|------|---------|-------------|-------|--------|--------|--------|--------|--------|--------|
| 0  | s:   | 1.00    | 1.27        | 196   | B1     |        |        |        |        |        |
| 1  | s:   | 1.14    | 1.27        | 194   | Cn B   |        |        |        |        |        |
| 2  | s:   | 1.51    | 1.27        | 195   | C1 B   |        |        |        |        |        |
| 3  | s:   | 1.61    | 1.27        | 195   | Fn     |        |        |        |        |        |
| 4  | s:   | 1.85    | 1.27        | 196   | F2     |        |        |        |        |        |
| 5  | s:   | 5.83    | 1.27        | 195   | An     |        |        |        |        |        |
| 6  | s:   | 6.92    | 1.27        | 196   | A2     |        |        |        |        |        |
| 7  | s:   | 9.79    | 1.27        | 196   | F1     |        |        |        |        |        |
| 8  | s:   | 19.23   | 1.27        | 196   | R3     |        |        |        |        |        |
| 9  | s:   | 21.72   | 1.27        | 196   | D1F    |        |        |        |        |        |
| 10 | s:   | 24.23   | 1.27        | 196   | D3F    |        |        |        |        |        |
| 11 | s:   | 25.24   | 1.27        | 196   | D3     |        |        |        |        |        |
| 12 | s:   | 26.91   | 1.27        | 196   | R2     |        |        |        |        |        |
| 13 | s:   | 34.26   | 1.27        | 196   | A3     |        |        |        |        |        |
| 14 | s:   | 39.96   | 1.27        | 196   | D4     |        |        |        |        |        |
| 15 | s:   | 51.27   | 1.27        | 196   | D2     |        |        |        |        |        |
| 16 | s:   | 79.56   | 1.27        | 196   | D1     |        |        |        |        |        |
| 17 | s:   | 6308.39 | 1.25        | 261   | Bna    |        |        |        |        |        |

# Sample 12 / cycle 5 / Fn

NETZSCH Thermokinetics 1

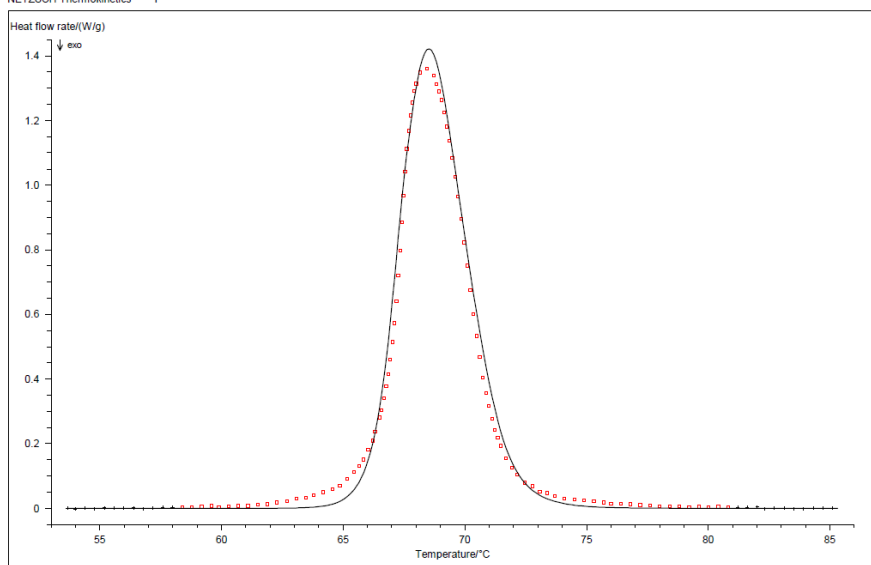

## NETZSCH Thermokinetics

Date/Time: 30.11.2016 at 15:52

Project: 1

Model 1: n-th order

A-1→B

Start evaluation: 0.00050

Measurement type: DSC

Fine evaluation: 0.99950

SCAN 1

Identity:

OP320 10.05.2016 11:06:30/Segm.S2/3

Transfer Corr: 204 F1.kcr

Min. Temp/°C: 53.6883

Min. Time/min: 0.0

Max. Temp/°C: 85.3150

Max. Time/min: 5.2941

Heating rate/(K/min): 5.974

Sampling time/s: 1.005

Sample mass/mg: 3.590

Base line type: tangent area prop.

LeftPts: 25 RightPts: 25

## PARAMETERS AND STANDARD DEVIATIONS

| # | Parameter              | Initial Val. | Optimum Val. | Minimum | Maximum | Sign | t*Std.Dev. |
|---|------------------------|--------------|--------------|---------|---------|------|------------|
| 0 | log A1/s <sup>-1</sup> | 247.1558     | 247.1558     |         |         |      | 2.1389E-2  |
| 1 | E1 kJ/mol              | 1621.1392    | 1621.1392    |         |         | +    | 0.3714     |
| 2 | React.ord. 1           | 2.7046       | 2.7046       |         |         | +    | 0.1934     |
| 3 | Area 1/(J/g)           | 50.2719      | 50.2719      |         |         |      | constant   |

## STATISTICS

Least squares: 4.51392 Number of cycles: 14

Mean of residues: 0.11933 Max.No of cycles: 50

Correlation coefficient: 0.995776 Rel. precision: 0.001000

Durbin-Watson Value: 0.038 t-critical(0.95;224): 1.962

Durbin-Watson Factor: 5.146

## F-TEST ON FIT-QUALITY

| #  | Code | Fexp   | Fcrit(0.95) | f-act | Type 1 | Type 2 | Type 3 | Type 4 | Type 5 | Type 6 |
|----|------|--------|-------------|-------|--------|--------|--------|--------|--------|--------|
| 0  | s:   | 1.00   | 1.25        | 223   | Cn B   |        |        |        |        |        |
| 1  | s:   | 1.32   | 1.25        | 224   | C1 B   |        |        |        |        |        |
| 2  | s:   | 2.03   | 1.25        | 224   | Fn     |        |        |        |        |        |
| 3  | s:   | 2.76   | 1.25        | 225   | F2     |        |        |        |        |        |
| 4  | s:   | 6.24   | 1.25        | 224   | An     |        |        |        |        |        |
| 5  | s:   | 7.41   | 1.25        | 225   | A2     |        |        |        |        |        |
| 6  | s:   | 10.47  | 1.25        | 225   | F1     |        |        |        |        |        |
| 7  | s:   | 18.56  | 1.25        | 225   | R3     |        |        |        |        |        |
| 8  | s:   | 20.17  | 1.25        | 225   | B1     |        |        |        |        |        |
| 9  | s:   | 20.70  | 1.25        | 225   | D1F    |        |        |        |        |        |
| 10 | s:   | 23.53  | 1.25        | 225   | D3F    |        |        |        |        |        |
| 11 | s:   | 24.58  | 1.25        | 225   | D3     |        |        |        |        |        |
| 12 | s:   | 25.00  | 1.25        | 225   | R2     |        |        |        |        |        |
| 13 | s:   | 36.55  | 1.25        | 225   | D4     |        |        |        |        |        |
| 14 | s:   | 44.94  | 1.25        | 225   | D2     |        |        |        |        |        |
| 15 | s:   | 67.46  | 1.25        | 225   | D1     |        |        |        |        |        |
| 16 | s:   | 314.24 | 1.25        | 225   | A3     |        |        |        |        |        |
| 17 | s:   | 993.11 | 1.25        | 223   | Bna    |        |        |        |        |        |

## Sample 12 / cycle 6 / Fn

NETZSCH Thermokinetics 1

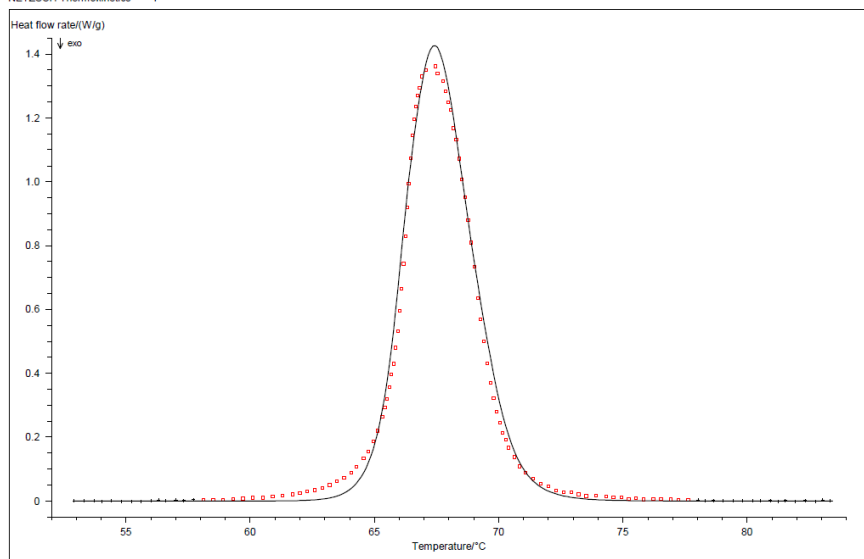

NETZSCH Thermokinetics

Date/Time: 30.11.2016 at 15:54

Project: 1

Model 1: n-th order

A—1→B

Start evaluation: 0.00050

Measurement type: DSC

Fine evaluation: 0.99950

SCAN 1

Identity:

OP320 10.05.2016 12:19:04/Segm.S2/3

Transfer Corr: 204 F1.kcr

Min. Temp/°C: 52.9196

Min. Time/min: 0.0

Max. Temp/°C: 83.4344

Max. Time/min: 5.1066

Heating rate/(K/min): 5.976

Sampling time/s: 1.005

Sample mass/mg: 3.590

Base line type: tangent area prop.

LeftPts: 25

RightPts: 25

### PARAMETERS AND STANDARD DEVIATIONS

| # | Parameter              | Initial Val. | Optimum Val. | Minimum | Maximum | Sign | t*Std.Dev. |
|---|------------------------|--------------|--------------|---------|---------|------|------------|
| 0 | log A1/s <sup>-1</sup> | 239.4723     | 239.4723     |         |         |      | 2.1819E-2  |
| 1 | E1 kJ/mol              | 1565.9649    | 1565.9649    |         |         | +    | 0.3987     |
| 2 | React.ord. 1           | 2.5355       | 2.5355       |         |         | +    | 0.2034     |
| 3 | Area 1/(J/g)           | 49.5771      | 49.5771      |         |         |      | constant   |

### STATISTICS

|                          |          |                       |          |
|--------------------------|----------|-----------------------|----------|
| Least squares:           | 4.01552  | Number of cycles:     | 14       |
| Mean of residues:        | 0.11455  | Max.No of cycles:     | 50       |
| Correlation coefficient: | 0.996248 | Rel. precision:       | 0.001000 |
| Durbin-Watson Value:     | 0.059    | t-critical(0.95;194): | 1.963    |
| Durbin-Watson Factor:    | 4.148    |                       |          |

### F-TEST ON FIT-QUALITY

| #  | Code | Fexp   | Fcrit(0.95) | f-act | Type 1 | Type 2 | Type 3 | Type 4 | Type 5 | Type 6 |
|----|------|--------|-------------|-------|--------|--------|--------|--------|--------|--------|
| 0  | s:   | 1.00   | 1.27        | 195   | B1     |        |        |        |        |        |
| 1  | s:   | 1.08   | 1.27        | 194   | C1 B   |        |        |        |        |        |
| 2  | s:   | 1.13   | 1.27        | 193   | Cn B   |        |        |        |        |        |
| 3  | s:   | 1.56   | 1.27        | 194   | Fn     |        |        |        |        |        |
| 4  | s:   | 1.97   | 1.27        | 195   | F2     |        |        |        |        |        |
| 5  | s:   | 4.87   | 1.27        | 194   | An     |        |        |        |        |        |
| 6  | s:   | 5.76   | 1.27        | 195   | A2     |        |        |        |        |        |
| 7  | s:   | 8.33   | 1.27        | 195   | F1     |        |        |        |        |        |
| 8  | s:   | 15.40  | 1.27        | 195   | R3     |        |        |        |        |        |
| 9  | s:   | 17.75  | 1.27        | 195   | D1F    |        |        |        |        |        |
| 10 | s:   | 19.88  | 1.27        | 195   | D3F    |        |        |        |        |        |
| 11 | s:   | 20.65  | 1.27        | 195   | D3     |        |        |        |        |        |
| 12 | s:   | 21.07  | 1.27        | 195   | R2     |        |        |        |        |        |
| 13 | s:   | 30.78  | 1.27        | 195   | D4     |        |        |        |        |        |
| 14 | s:   | 39.19  | 1.27        | 195   | D2     |        |        |        |        |        |
| 15 | s:   | 59.61  | 1.27        | 195   | D1     |        |        |        |        |        |
| 16 | s:   | 281.32 | 1.27        | 195   | A3     |        |        |        |        |        |
| 17 | s:   | 742.06 | 1.26        | 223   | Bna    |        |        |        |        |        |

## Sample 12 / cycle 7 / Fn

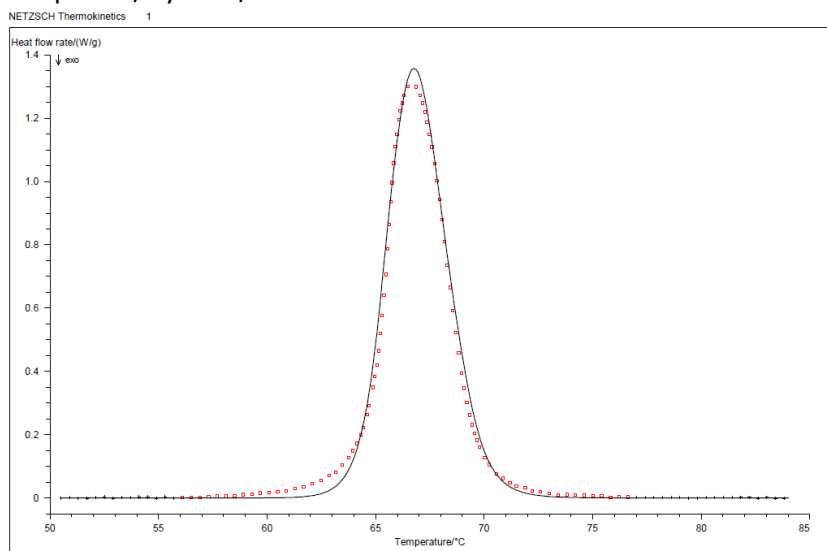

## NETZSCH Thermokinetics

Date/Time: 30.11.2016 at 15:56

Project: 1  
Model 1: n-th order

A—1→B

Start evaluation: 0.00050 Measurement type: DSC  
 Fine evaluation: 0.99950  
 SCAN 1 Identity: OP320 10.05.2016 13:07:36/Segm.S2/3  
 Transfer Corr: 204 F1.kcr  
 Min. Temp/°C: 50.5080 Min. Time/min: 0.0  
 Max. Temp/°C: 84.0191 Max. Time/min: 5.6093  
 Heating rate/(K/min): 5.974 Sampling time/s: 1.005  
 Sample mass/mg: 3.590  
 Base line type: tangent area prop. LeftPts: 25 RightPts: 25

## PARAMETERS AND STANDARD DEVIATIONS

| # | Parameter              | Initial Val. | Optimum Val. | Minimum | Maximum | Sign | t*Std.Dev. |
|---|------------------------|--------------|--------------|---------|---------|------|------------|
| 0 | log A1/s <sup>-1</sup> | 224.3049     | 217.2666     |         |         |      | 0.3045     |
| 1 | E1 kJ/mol              | 1464.2291    | 1418.9183    |         |         | +    | 2.0169     |
| 2 | React.ord. 1           | 2.5272       | 2.3496       |         |         | +    | 7.1785E-2  |
| 3 | Area 1/(J/g)           | 48.6399      | 48.6399      |         |         |      | constant   |

## STATISTICS

Least squares: 3.12527 Number of cycles: 9  
 Mean of residues: 9.64438E-2 Max.No of cycles: 50  
 Correlation coefficient: 0.996570 Rel. precision: 0.001000  
 Durbin-Watson Value: 0.040 t-critical(0.95;204): 1.963  
 Durbin-Watson Factor: 5.052

## F-TEST ON FIT-QUALITY

| #  | Code | Fexp    | Fcrit(0.95) | f-act | Type 1 | Type 2 | Type 3 | Type 4 | Type 5 | Type 6 |
|----|------|---------|-------------|-------|--------|--------|--------|--------|--------|--------|
| 0  | s:   | 1.00    | 1.26        | 205   | B1     |        |        |        |        |        |
| 1  | s:   | 1.06    | 1.26        | 204   | C1 B   |        |        |        |        |        |
| 2  | s:   | 1.10    | 1.26        | 203   | Cn B   |        |        |        |        |        |
| 3  | s:   | 1.71    | 1.26        | 204   | Fn     |        |        |        |        |        |
| 4  | s:   | 1.94    | 1.26        | 205   | F2     |        |        |        |        |        |
| 5  | s:   | 5.38    | 1.26        | 204   | An     |        |        |        |        |        |
| 6  | s:   | 5.58    | 1.26        | 205   | A3     |        |        |        |        |        |
| 7  | s:   | 6.21    | 1.26        | 205   | A2     |        |        |        |        |        |
| 8  | s:   | 8.83    | 1.26        | 205   | F1     |        |        |        |        |        |
| 9  | s:   | 16.98   | 1.26        | 205   | R3     |        |        |        |        |        |
| 10 | s:   | 19.11   | 1.26        | 205   | D1F    |        |        |        |        |        |
| 11 | s:   | 21.49   | 1.26        | 205   | D3F    |        |        |        |        |        |
| 12 | s:   | 22.44   | 1.26        | 205   | D3     |        |        |        |        |        |
| 13 | s:   | 24.08   | 1.26        | 205   | R2     |        |        |        |        |        |
| 14 | s:   | 35.41   | 1.26        | 205   | D4     |        |        |        |        |        |
| 15 | s:   | 44.59   | 1.26        | 205   | D2     |        |        |        |        |        |
| 16 | s:   | 68.44   | 1.26        | 205   | D1     |        |        |        |        |        |
| 17 | s:   | 1102.13 | 1.25        | 223   | Bna    |        |        |        |        |        |

# Sample 12 / cycle 8 / Fn

NETZSCH Thermokinetics 1

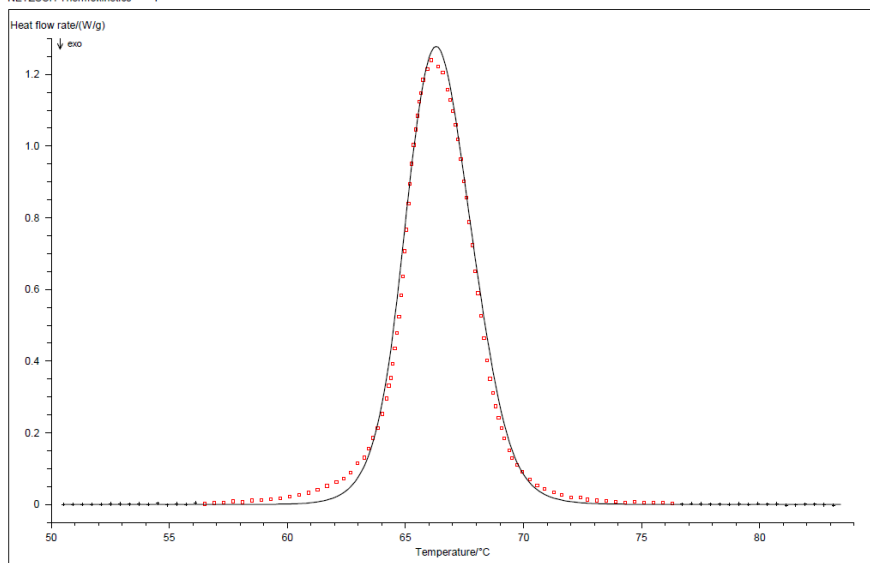

## NETZSCH Thermokinetics

Date/Time: 30.11.2016 at 15:58

Project: 1

Model 1: n-th order

A—1→B

Start evaluation: 0.00050

Measurement type: DSC

Fine evaluation: 0.99950

SCAN 1

Identity:

OP320 10.05.2016 13:49:34/Segm.S2/3

Transfer Corr: 204 F1.kcr

Min. Temp/°C: 50.5127

Min. Time/min: 0.0

Max. Temp/°C: 83.4191

Max. Time/min: 5.5095

Heating rate/(K/min): 5.973

Sampling time/s: 1.005

Sample mass/mg: 3.590

Base line type: tangent area prop.

LeftPts: 35

RightPts: 35

## PARAMETERS AND STANDARD DEVIATIONS

| # | Parameter              | Initial Val. | Optimum Val. | Minimum | Maximum | Sign | t*Std.Dev. |
|---|------------------------|--------------|--------------|---------|---------|------|------------|
| 0 | log A1/s <sup>-1</sup> | 197.7118     | 197.7119     |         |         |      | 2.2433E-2  |
| 1 | E1 kJ/mol              | 1290.2549    | 1290.2549    |         |         | +    | 0.2035     |
| 2 | React.ord. 1           | 2.2047       | 2.2050       |         |         | +    | 8.0337E-2  |
| 3 | Area 1/(J/g)           | 47.3854      | 47.3854      |         |         |      | constant   |

## STATISTICS

Least squares: 2.52075

Number of cycles: 14

Mean of residues: 8.73993E-2

Max.No of cycles: 50

Correlation coefficient: 0.996981

Rel. precision: 0.001000

Durbin-Watson Value: 0.044

t-critical(0.95;200): 1.963

Durbin-Watson Factor: 4.806

## F-TEST ON FIT-QUALITY

| #  | Code | Fexp    | Fcrit(0.95) | f-act | Type 1 | Type 2 | Type 3 | Type 4 | Type 5 | Type 6 |
|----|------|---------|-------------|-------|--------|--------|--------|--------|--------|--------|
| 0  | s:   | 1.00    | 1.26        | 201   | B1     |        |        |        |        |        |
| 1  | s:   | 1.05    | 1.26        | 200   | C1 B   |        |        |        |        |        |
| 2  | s:   | 1.09    | 1.26        | 199   | Cn B   |        |        |        |        |        |
| 3  | s:   | 1.76    | 1.26        | 200   | Fn     |        |        |        |        |        |
| 4  | s:   | 1.86    | 1.26        | 201   | F2     |        |        |        |        |        |
| 5  | s:   | 5.81    | 1.26        | 200   | An     |        |        |        |        |        |
| 6  | s:   | 6.71    | 1.26        | 201   | A2     |        |        |        |        |        |
| 7  | s:   | 9.34    | 1.26        | 201   | F1     |        |        |        |        |        |
| 8  | s:   | 14.52   | 1.26        | 201   | A3     |        |        |        |        |        |
| 9  | s:   | 18.82   | 1.26        | 201   | R3     |        |        |        |        |        |
| 10 | s:   | 20.90   | 1.26        | 201   | D1F    |        |        |        |        |        |
| 11 | s:   | 23.39   | 1.26        | 201   | D3F    |        |        |        |        |        |
| 12 | s:   | 24.43   | 1.26        | 201   | D3     |        |        |        |        |        |
| 13 | s:   | 26.76   | 1.26        | 201   | R2     |        |        |        |        |        |
| 14 | s:   | 38.32   | 1.26        | 201   | D4     |        |        |        |        |        |
| 15 | s:   | 52.34   | 1.26        | 201   | D2     |        |        |        |        |        |
| 16 | s:   | 78.81   | 1.26        | 201   | D1     |        |        |        |        |        |
| 17 | s:   | 1378.01 | 1.25        | 223   | Bna    |        |        |        |        |        |

## Sample 12 / cycle 9 / Fn

NETZSCH Thermokinetics 1

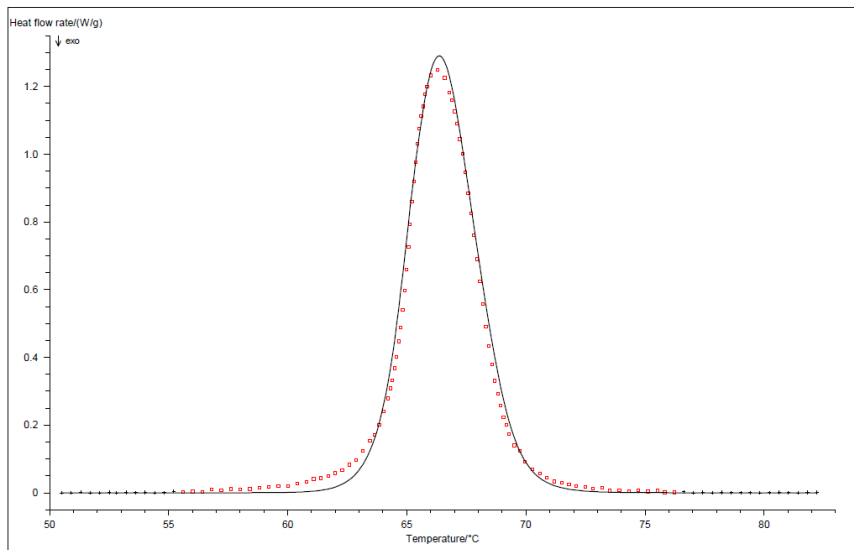

## NETZSCH Thermokinetics

Date/Time: 30.11.2016 at 16:00

Project: 1

Model 1: n-th order

A—1→B

Start evaluation: 0.00050

Measurement type: DSC

Fine evaluation: 0.99950

SCAN 1

Identity:

OP320 10.05.2016 14:30:57/Segm.S2/3

Transfer Corr: 204 F1.kcr

Min. Temp/°C: 50.5146

Min. Time/min: 0.0

Max. Temp/°C: 82.2246

Max. Time/min: 5.3067

Heating rate/(K/min): 5.975

Sampling time/s: 1.004

Sample mass/mg: 3.590

Base line type: tangent area prop.

LeftPts: 25

RightPts: 25

## PARAMETERS AND STANDARD DEVIATIONS

| # | Parameter              | Initial Val. | Optimum Val. | Minimum | Maximum | Sign | t*Std.Dev. |
|---|------------------------|--------------|--------------|---------|---------|------|------------|
| 0 | log A1/s <sup>-1</sup> | 200.5088     | 200.5088     |         |         |      | 2.0934E-2  |
| 1 | E1 kJ/mol              | 1308.6182    | 1308.6182    |         |         | +    | 0.3527     |
| 2 | React.ord. 1           | 2.2205       | 2.2205       |         |         | +    | 0.1741     |
| 3 | Area 1/(J/g)           | 47.5906      | 47.5906      |         |         |      | constant   |

## STATISTICS

Least squares: 3.04965

Number of cycles: 14

Mean of residues: 9.79290E-2

Max.No of cycles: 50

Correlation coefficient: 0.996565

Rel. precision: 0.001000

Durbin-Watson Value: 0.033

t-critical(0.95;208): 1.963

Durbin-Watson Factor: 5.501

## F-TEST ON FIT-QUALITY

| #  | Code | Fexp    | Fcrit(0.95) | f-act | Type 1 | Type 2 | Type 3 | Type 4 | Type 5 | Type 6 |
|----|------|---------|-------------|-------|--------|--------|--------|--------|--------|--------|
| 0  | s:   | 1.00    | 1.26        | 207   | Cn B   |        |        |        |        |        |
| 1  | s:   | 1.12    | 1.26        | 209   | B1     |        |        |        |        |        |
| 2  | s:   | 1.15    | 1.26        | 208   | C1 B   |        |        |        |        |        |
| 3  | s:   | 2.11    | 1.26        | 208   | Fn     |        |        |        |        |        |
| 4  | s:   | 2.23    | 1.26        | 209   | F2     |        |        |        |        |        |
| 5  | s:   | 6.16    | 1.26        | 208   | An     |        |        |        |        |        |
| 6  | s:   | 6.44    | 1.26        | 209   | A3     |        |        |        |        |        |
| 7  | s:   | 7.16    | 1.26        | 209   | A2     |        |        |        |        |        |
| 8  | s:   | 10.01   | 1.26        | 209   | F1     |        |        |        |        |        |
| 9  | s:   | 19.79   | 1.26        | 209   | R3     |        |        |        |        |        |
| 10 | s:   | 21.80   | 1.26        | 209   | D1F    |        |        |        |        |        |
| 11 | s:   | 24.61   | 1.26        | 209   | D3F    |        |        |        |        |        |
| 12 | s:   | 25.78   | 1.26        | 209   | D3     |        |        |        |        |        |
| 13 | s:   | 27.87   | 1.26        | 209   | R2     |        |        |        |        |        |
| 14 | s:   | 40.15   | 1.26        | 209   | D4     |        |        |        |        |        |
| 15 | s:   | 52.92   | 1.26        | 209   | D2     |        |        |        |        |        |
| 16 | s:   | 82.20   | 1.26        | 209   | D1     |        |        |        |        |        |
| 17 | s:   | 1418.79 | 1.25        | 223   | Bna    |        |        |        |        |        |

## Sample 13 / cycle 1 / Fn

NETZSCH Thermokinetics 1

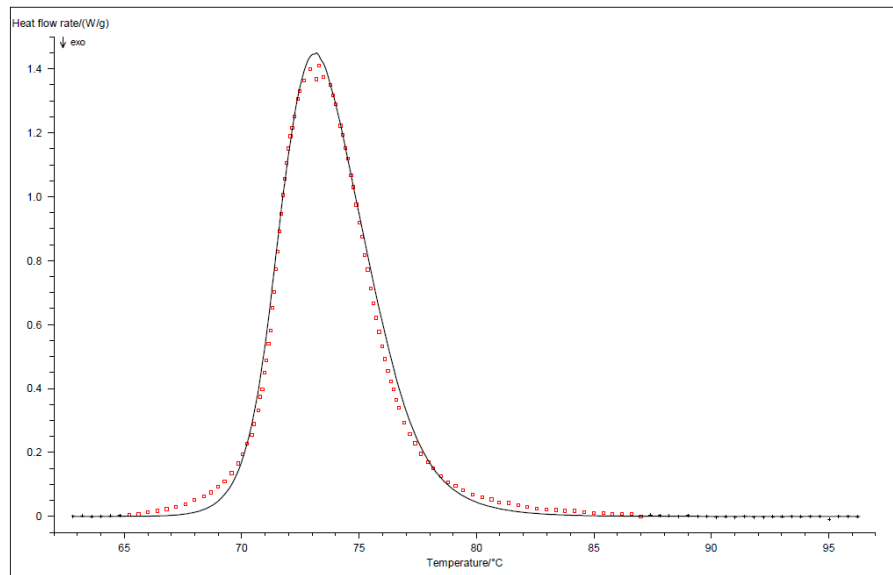

## NETZSCH Thermokinetics

Date/Time: 30.11.2016 at 16:15

Project: 1

Model 1: n-th order

A-1→B

Start evaluation: 0.00050

Measurement type: DSC

Fine evaluation: 0.99950

SCAN 1

Identity:

OP320 27.06.2016 15:34:13/Segm.S1/3

Transfer Corr: 204 F1.kcr

Min. Temp/°C: 62.8057

Min. Time/min: 0.0

Max. Temp/°C: 96.3237

Max. Time/min: 3.7324

Heating rate/(K/min): 8.980

Sampling time/s: 0.670

Sample mass/mg: 4.100

Base line type:

LeftPts: 20

RightPts: 25

## PARAMETERS AND STANDARD DEVIATIONS

| # | Parameter              | Initial Val. | Optimum Val. | Minimum | Maximum | Sign | t*Std.Dev. |
|---|------------------------|--------------|--------------|---------|---------|------|------------|
| 0 | log A1/s <sup>-1</sup> | 192.8752     | 192.8752     |         |         |      | 1.5079E-2  |
| 1 | E1 kJ/mol              | 1282.9317    | 1282.9317    |         |         | +    | 0.1677     |
| 2 | React.ord. 1           | 3.0792       | 3.0792       |         |         | +    | 8.9848E-2  |
| 3 | Area 1/(J/g)           | 47.3213      | 47.3213      |         |         |      | constant   |

## STATISTICS

Least squares: 3.13378

Number of cycles: 14

Mean of residues: 9.67191E-2

Max.No of cycles: 50

Correlation coefficient: 0.997554

Rel. precision: 0.001000

Durbin-Watson Value: 0.072

t-critical(0.95;216): 1.962

Durbin-Watson Factor: 3.770

## F-TEST ON FIT-QUALITY

| #  | Code | Fexp  | Fcrit(0.95) | f-act | Type 1 | Type 2 | Type 3 | Type 4 | Type 5 | Type 6 |
|----|------|-------|-------------|-------|--------|--------|--------|--------|--------|--------|
| 0  | s:   | 1.00  | 1.25        | 215   | Bna    |        |        |        |        |        |
| 1  | s:   | 1.00  | 1.25        | 215   | Cn B   |        |        |        |        |        |
| 2  | s:   | 1.33  | 1.25        | 216   | Fn     |        |        |        |        |        |
| 3  | s:   | 1.37  | 1.25        | 216   | C1 B   |        |        |        |        |        |
| 4  | s:   | 3.24  | 1.25        | 217   | B1     |        |        |        |        |        |
| 5  | s:   | 3.50  | 1.25        | 217   | F2     |        |        |        |        |        |
| 6  | s:   | 7.52  | 1.25        | 216   | An     |        |        |        |        |        |
| 7  | s:   | 10.57 | 1.25        | 217   | A3     |        |        |        |        |        |
| 8  | s:   | 12.38 | 1.25        | 217   | A2     |        |        |        |        |        |
| 9  | s:   | 16.42 | 1.25        | 217   | F1     |        |        |        |        |        |
| 10 | s:   | 28.38 | 1.25        | 217   | R3     |        |        |        |        |        |
| 11 | s:   | 30.89 | 1.25        | 217   | D1F    |        |        |        |        |        |
| 12 | s:   | 33.74 | 1.25        | 217   | D3F    |        |        |        |        |        |
| 13 | s:   | 34.92 | 1.25        | 217   | D3     |        |        |        |        |        |
| 14 | s:   | 37.50 | 1.25        | 217   | R2     |        |        |        |        |        |
| 15 | s:   | 50.81 | 1.25        | 217   | D4     |        |        |        |        |        |
| 16 | s:   | 63.28 | 1.25        | 217   | D2     |        |        |        |        |        |
| 17 | s:   | 92.91 | 1.25        | 217   | D1     |        |        |        |        |        |

# Sample 13 / cycle 2 / Fn

NETZSCH Thermokinetics 1

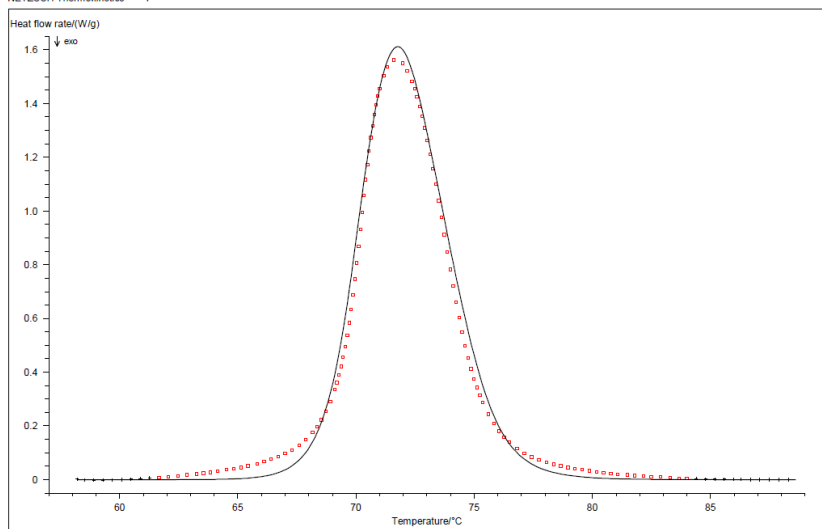

## NETZSCH Thermokinetics

Date/Time: 30.11.2016 at 16:18

Project: 1

Model 1: n-th order

A—1→B

Start evaluation: 0.00050

Measurement type: DSC

Fine evaluation: 0.99950

SCAN 1 Identity:

OP320 27.06.2016 16:05:07/Segm.S1/3

Transfer Corr: 204 F1.kcr

Min. Temp/°C: 58.2038

Min. Time/min: 0.0

Max. Temp/°C: 88.5867

Max. Time/min: 3.4067

Heating rate/(K/min): 8.918

Sampling time/s: 0.670

Sample mass/mg: 4.100

LeftPts: 50

RightPts: 25

## PARAMETERS AND STANDARD DEVIATIONS

| # | Parameter              | Initial Val. | Optimum Val. | Minimum | Maximum | Sign | t*Std.Dev. |
|---|------------------------|--------------|--------------|---------|---------|------|------------|
| 0 | log A1/s <sup>-1</sup> | 172.3340     | 172.3340     |         |         |      | 1.9103E-2  |
| 1 | E1 kJ/mol              | 1142.7247    | 1142.7247    |         |         | +    | 0.2348     |
| 2 | React.ord. 1           | 2.4591       | 2.4591       |         |         | +    | 0.1163     |
| 3 | Area 1/(J/g)           | 51.8193      | 51.8193      |         |         |      | constant   |

## STATISTICS

Least squares: 7.03725

Number of cycles: 14

Mean of residues: 0.15165

Max.No of cycles: 50

Correlation coefficient: 0.995945

Rel. precision: 0.001000

Durbin-Watson Value: 0.011

t-critical(0.95;224): 1.962

Durbin-Watson Factor: 9.565

## F-TEST ON FIT-QUALITY

| #  | Code | Fexp  | Fcrit(0.95) | f-act | Type 1 | Type 2 | Type 3 | Type 4 | Type 5 | Type 6 |
|----|------|-------|-------------|-------|--------|--------|--------|--------|--------|--------|
| 0  | s:   | 1.00  | 1.25        | 223   | Cn B   |        |        |        |        |        |
| 1  | s:   | 1.12  | 1.25        | 225   | B1     |        |        |        |        |        |
| 2  | s:   | 1.15  | 1.25        | 224   | C1 B   |        |        |        |        |        |
| 3  | s:   | 1.37  | 1.25        | 223   | Bna    |        |        |        |        |        |
| 4  | s:   | 1.99  | 1.25        | 224   | Fn     |        |        |        |        |        |
| 5  | s:   | 2.41  | 1.25        | 225   | F2     |        |        |        |        |        |
| 6  | s:   | 5.40  | 1.25        | 224   | An     |        |        |        |        |        |
| 7  | s:   | 6.50  | 1.25        | 225   | A3     |        |        |        |        |        |
| 8  | s:   | 7.43  | 1.25        | 225   | A2     |        |        |        |        |        |
| 9  | s:   | 10.36 | 1.25        | 225   | F1     |        |        |        |        |        |
| 10 | s:   | 19.26 | 1.25        | 225   | R3     |        |        |        |        |        |
| 11 | s:   | 21.04 | 1.25        | 225   | D1F    |        |        |        |        |        |
| 12 | s:   | 23.91 | 1.25        | 225   | D3F    |        |        |        |        |        |
| 13 | s:   | 25.13 | 1.25        | 225   | D3     |        |        |        |        |        |
| 14 | s:   | 26.45 | 1.25        | 225   | R2     |        |        |        |        |        |
| 15 | s:   | 38.02 | 1.25        | 225   | D4     |        |        |        |        |        |
| 16 | s:   | 48.71 | 1.25        | 225   | D2     |        |        |        |        |        |
| 17 | s:   | 73.97 | 1.25        | 225   | D1     |        |        |        |        |        |

# Sample 13 / cycle 3 / Fn

NETZSCH Thermokinetics 1

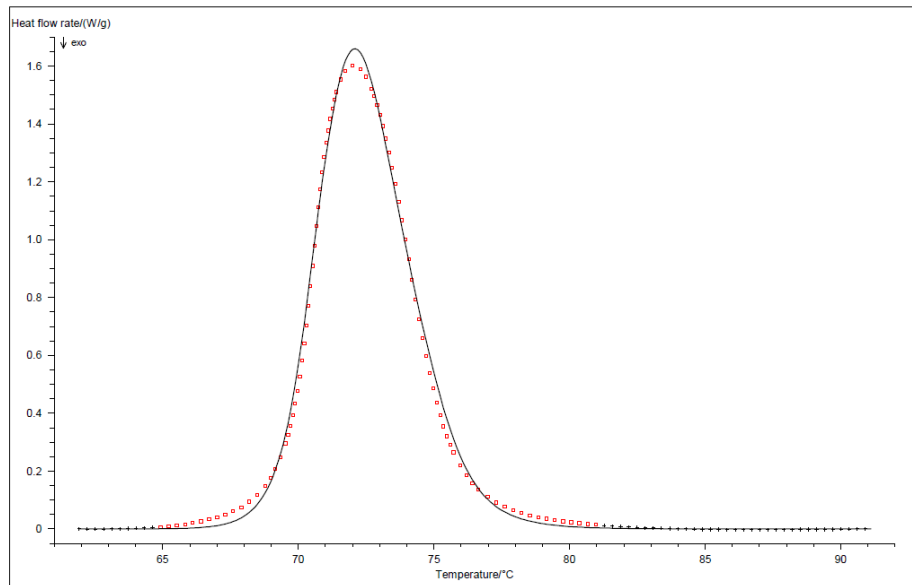

## NETZSCH Thermokinetics

Date/Time: 30.11.2016 at 16:22

Project: 1

Model 1: n-th order

A—1→B

Start evaluation: 0.00050

Measurement type: DSC

Fine evaluation: 0.99950

OP320 27.06.2016 17:55:36/Segm.S1/3

SCAN 1 Identity: 204 F1.kcr

Transfer Corr: 61.9203

Min. Time/min: 0.0

Min. Temp/°C: 91.1126

Max. Time/min: 3.2587

Max. Temp/°C: 8.958

Sampling time/s: 0.672

Heating rate/(K/min): 4.100

Sample mass/mg: Base line type:

LeftPts: 25 RightPts: 50

## PARAMETERS AND STANDARD DEVIATIONS

| # | Parameter              | Initial Val. | Optimum Val. | Minimum | Maximum | Sign | t*Std.Dev. |
|---|------------------------|--------------|--------------|---------|---------|------|------------|
| 0 | log A1/s <sup>-1</sup> | 160.6675     | 200.0361     |         |         |      | 6.3408E-2  |
| 1 | E1 kJ/mol              | 1067.1637    | 1326.3366    |         |         | +    | 0.4413     |
| 2 | React.ord. 1           | 2.2115       | 2.6925       |         |         | +    | 5.2194E-2  |
| 3 | Area 1/(J/g)           | 49.4243      | 49.4243      |         |         |      | constant   |

## STATISTICS

|                          |            |                       |          |
|--------------------------|------------|-----------------------|----------|
| Least squares:           | 2.75586    | Number of cycles:     | 21       |
| Mean of residues:        | 9.71487E-2 | Max.No of cycles:     | 50       |
| Correlation coefficient: | 0.998330   | Rel. precision:       | 0.001000 |
| Durbin-Watson Value:     | 0.032      | t-critical(0.95;160): | 1.966    |
| Durbin-Watson Factor:    | 5.655      |                       |          |

## F-TEST ON FIT-QUALITY

| #  | Code | Fexp   | Fcrit(0.95) | f-fact | Type 1 | Type 2 | Type 3 | Type 4 | Type 5 | Type 6 |
|----|------|--------|-------------|--------|--------|--------|--------|--------|--------|--------|
| 0  | s:   | 1.00   | 1.30        | 160    | Fn     |        |        |        |        |        |
| 1  | s:   | 1.00   | 1.30        | 159    | Cn B   |        |        |        |        |        |
| 2  | s:   | 1.25   | 1.27        | 223    | Bna    |        |        |        |        |        |
| 3  | s:   | 1.64   | 1.30        | 161    | B1     |        |        |        |        |        |
| 4  | s:   | 1.66   | 1.30        | 160    | C1 B   |        |        |        |        |        |
| 5  | s:   | 2.23   | 1.30        | 161    | F2     |        |        |        |        |        |
| 6  | s:   | 6.16   | 1.30        | 160    | An     |        |        |        |        |        |
| 7  | s:   | 10.39  | 1.30        | 161    | A2     |        |        |        |        |        |
| 8  | s:   | 15.25  | 1.30        | 161    | F1     |        |        |        |        |        |
| 9  | s:   | 28.69  | 1.30        | 161    | R3     |        |        |        |        |        |
| 10 | s:   | 33.91  | 1.30        | 161    | D1F    |        |        |        |        |        |
| 11 | s:   | 36.74  | 1.30        | 161    | D3F    |        |        |        |        |        |
| 12 | s:   | 37.87  | 1.30        | 161    | D3     |        |        |        |        |        |
| 13 | s:   | 39.22  | 1.30        | 161    | R2     |        |        |        |        |        |
| 14 | s:   | 53.24  | 1.30        | 161    | A3     |        |        |        |        |        |
| 15 | s:   | 57.10  | 1.30        | 161    | D4     |        |        |        |        |        |
| 16 | s:   | 74.75  | 1.30        | 161    | D2     |        |        |        |        |        |
| 17 | s:   | 106.71 | 1.30        | 161    | D1     |        |        |        |        |        |

## Sample 13 / cycle 4 / Fn

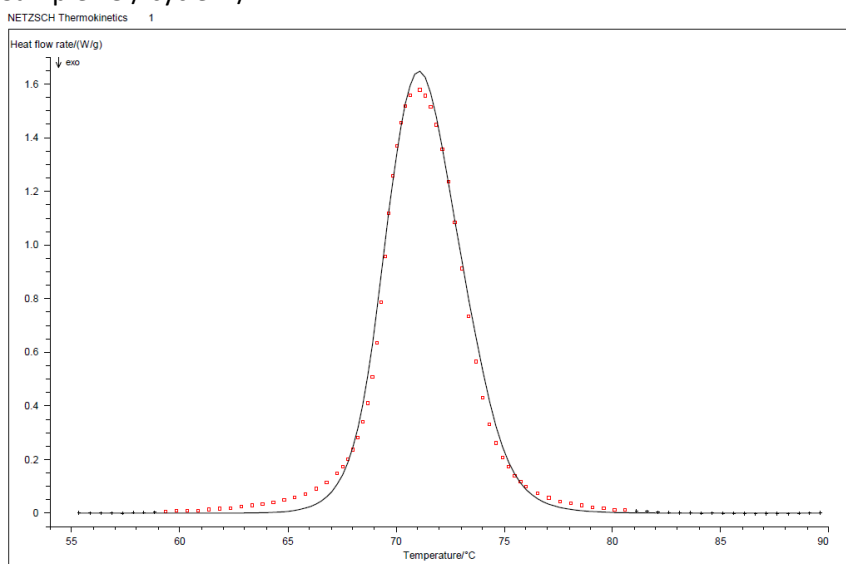

## NETZSCH Thermokinetics

Date/Time: 30.11.2016 at 16:25

Project: 1

Model 1: n-th order

A—1→B

Start evaluation: 0.00050

Measurement type: DSC

Fine evaluation: 0.99950

SCAN 1

Identity:

OP320 27.06.2016 18:34:46/Segm.S1/3

Transfer Corr: 204 F1.kcr

Min. Temp/°C: 55.3493

Min. Time/min: 0.0

Max. Temp/°C: 89.6176

Max. Time/min: 3.8303

Heating rate/(K/min): 8.947

Sampling time/s: 1.678

Sample mass/mg: 4.100

Base line type:

LeftPts: 30

RightPts: 25

## PARAMETERS AND STANDARD DEVIATIONS

| # | Parameter              | Initial Val. | Optimum Val. | Minimum | Maximum | Sign | t*Std.Dev. |
|---|------------------------|--------------|--------------|---------|---------|------|------------|
| 0 | log A1/s <sup>-1</sup> | 175.3051     | 175.2992     |         |         |      | 4.0018E-2  |
| 1 | E1 kJ/mol              | 1159.8633    | 1159.8240    |         |         | +    | 0.3392     |
| 2 | React.ord. 1           | 2.3936       | 2.3936       |         |         | +    | 0.1218     |
| 3 | Area 1/(J/g)           | 50.7611      | 50.7611      |         |         |      | constant   |

## STATISTICS

Least squares: 5.57010

Number of cycles: 1

Mean of residues: 0.20091

Max.No of cycles: 50

Correlation coefficient: 0.996440

Rel. precision: 0.001000

Durbin-Watson Value: 0.111

t-critical(0.95;85): 1.979

Durbin-Watson Factor: 3.041

## F-TEST ON FIT-QUALITY

| #  | Code | Fexp   | Fcrit(0.95) | f-act | Type 1 | Type 2 | Type 3 | Type 4 | Type 5 | Type 6 |
|----|------|--------|-------------|-------|--------|--------|--------|--------|--------|--------|
| 0  | s:   | 1.00   | 1.43        | 86    | B1     |        |        |        |        |        |
| 1  | s:   | 1.06   | 1.43        | 85    | C1 B   |        |        |        |        |        |
| 2  | s:   | 1.11   | 1.43        | 84    | Cn B   |        |        |        |        |        |
| 3  | s:   | 1.44   | 1.43        | 85    | Fn     |        |        |        |        |        |
| 4  | s:   | 1.68   | 1.43        | 86    | F2     |        |        |        |        |        |
| 5  | s:   | 4.27   | 1.43        | 85    | An     |        |        |        |        |        |
| 6  | s:   | 5.37   | 1.43        | 86    | A2     |        |        |        |        |        |
| 7  | s:   | 7.71   | 1.43        | 86    | F1     |        |        |        |        |        |
| 8  | s:   | 14.72  | 1.43        | 86    | R3     |        |        |        |        |        |
| 9  | s:   | 16.75  | 1.43        | 86    | D1F    |        |        |        |        |        |
| 10 | s:   | 18.75  | 1.43        | 86    | D3F    |        |        |        |        |        |
| 11 | s:   | 19.51  | 1.43        | 86    | D3     |        |        |        |        |        |
| 12 | s:   | 19.76  | 1.43        | 86    | A3     |        |        |        |        |        |
| 13 | s:   | 20.68  | 1.43        | 86    | R2     |        |        |        |        |        |
| 14 | s:   | 29.59  | 1.43        | 86    | D4     |        |        |        |        |        |
| 15 | s:   | 38.00  | 1.43        | 86    | D2     |        |        |        |        |        |
| 16 | s:   | 58.53  | 1.43        | 86    | D1     |        |        |        |        |        |
| 17 | s:   | 365.04 | 1.43        | 84    | Bna    |        |        |        |        |        |

## Sample 15 / cycle 2 / Fn

NETZSCH Thermokinetics 1

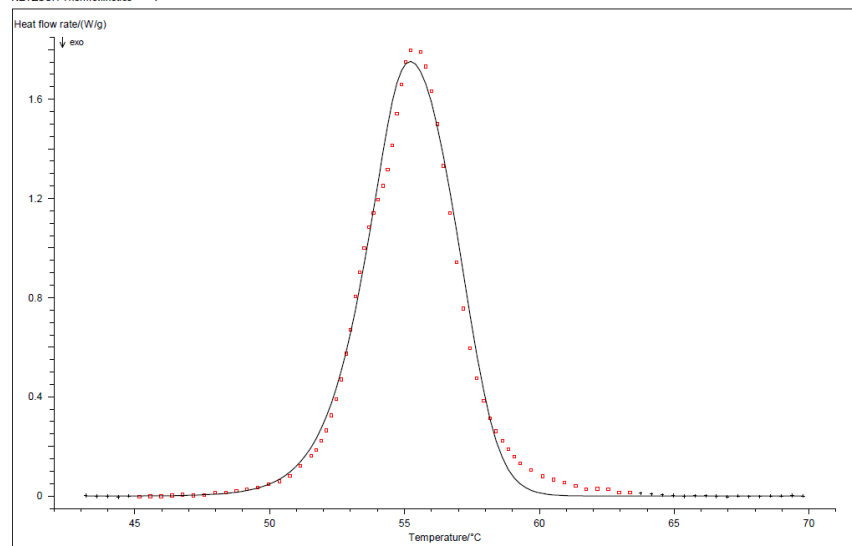

## NETZSCH Thermokinetics

Date/Time: 30.11.2016 at 13:16

Project: 1

Model 1: n-th order

A—1→B

Start evaluation: 0.00050

Measurement type: DSC

Fine evaluation: 0.99950

SCAN 1

Identity:

OP320 08.04.2016 12:36:46/Segm.S1/3

Transfer Corr: 204\_F1.kcr

Min. Temp/°C: 43.1838

Min. Time/min: 0.0

Max. Temp/°C: 69.7729

Max. Time/min: 2.9724

Heating rate/(K/min): 8.945

Sampling time/s: 1.341

Sample mass/mg: 2.800

Base line type:

LeftPts: 25

RightPts: 25

## PARAMETERS AND STANDARD DEVIATIONS

| # | Parameter              | Initial Val. | Optimum Val. | Minimum | Maximum | Sign | t*Std.Dev. |
|---|------------------------|--------------|--------------|---------|---------|------|------------|
| 0 | log A1/s <sup>-1</sup> | 127.7227     | 127.7227     |         |         |      | 5.1833E-2  |
| 1 | E1 kJ/mol              | 808.7707     | 808.7707     |         |         | +    | 0.8107     |
| 2 | React.ord. 1           | 1.4790       | 1.4790       |         |         | +    | 0.3518     |
| 3 | Area 1/(J/g)           | 50.1979      | 50.1979      |         |         |      | constant   |

## STATISTICS

Least squares: 10.96431

Number of cycles: 14

Mean of residues: 0.28605

Max.No of cycles: 50

Correlation coefficient: 0.994843

Rel. precision: 0.001000

Durbin-Watson Value: 0.161

t-critical(0.95;91): 1.977

Durbin-Watson Factor: 2.544

## F-TEST ON FIT-QUALITY

| #  | Code | Fexp  | Fcrit(0.95) | f-act | Type 1 | Type 2 | Type 3 | Type 4 | Type 5 | Type 6 |
|----|------|-------|-------------|-------|--------|--------|--------|--------|--------|--------|
| 0  | s:   | 1.00  | 1.42        | 90    | Cn B   |        |        |        |        |        |
| 1  | s:   | 1.11  | 1.42        | 91    | C1 B   |        |        |        |        |        |
| 2  | s:   | 1.26  | 1.42        | 91    | Fn     |        |        |        |        |        |
| 3  | s:   | 1.46  | 1.42        | 91    | An     |        |        |        |        |        |
| 4  | s:   | 1.62  | 1.42        | 92    | B1     |        |        |        |        |        |
| 5  | s:   | 1.65  | 1.42        | 92    | A3     |        |        |        |        |        |
| 6  | s:   | 1.82  | 1.42        | 92    | A2     |        |        |        |        |        |
| 7  | s:   | 1.88  | 1.42        | 92    | F2     |        |        |        |        |        |
| 8  | s:   | 2.31  | 1.42        | 92    | F1     |        |        |        |        |        |
| 9  | s:   | 5.39  | 1.42        | 92    | R3     |        |        |        |        |        |
| 10 | s:   | 5.69  | 1.42        | 92    | D1F    |        |        |        |        |        |
| 11 | s:   | 6.09  | 1.42        | 92    | D3F    |        |        |        |        |        |
| 12 | s:   | 6.67  | 1.42        | 92    | D3     |        |        |        |        |        |
| 13 | s:   | 8.34  | 1.42        | 92    | R2     |        |        |        |        |        |
| 14 | s:   | 11.97 | 1.42        | 92    | D4     |        |        |        |        |        |
| 15 | s:   | 16.86 | 1.42        | 92    | D2     |        |        |        |        |        |
| 16 | s:   | 30.26 | 1.42        | 92    | D1     |        |        |        |        |        |

## Sample 15 / cycle 3 / Fn

NETZSCH Thermokinetics

Date/Time: 30.11.2016 at 13:19

Project: 1

Model 1: n-th order

A → B

Start evaluation: 0.00050

Measurement type: DSC

Fine evaluation: 0.99950

SCAN 1

Identity:

OP320 08.04.2016 13:16:26/Segm.S1/3

Transfer Corr: 204\_F1.kcr

Min. Temp/°C: 42.3873

Min. Time/min: 0.0

Max. Temp/°C: 68.5768

Max. Time/min: 2.9275

Heating rate/(K/min): 8.946

Sampling time/s: 1.341

Sample mass/mg: 2.800

Base line type:

LeftPts: 30

RightPts: 25

## PARAMETERS AND STANDARD DEVIATIONS

| # | Parameter              | Initial Val. | Optimum Val. | Minimum | Maximum | Sign | t*Std.Dev. |
|---|------------------------|--------------|--------------|---------|---------|------|------------|
| 0 | log A1/s <sup>-1</sup> | 123.5428     | 142.0892     |         |         |      | 0.7735     |
| 1 | E1 kJ/mol              | 782.8291     | 898.7833     |         |         | +    | 4.9433     |
| 2 | React.ord. 1           | 1.3845       | 1.5967       |         |         | +    | 0.1120     |
| 3 | Area 1/(J/g)           | 51.1564      | 51.1564      |         |         |      | constant   |

## STATISTICS

Least squares: 7.28505

Number of cycles: 8

Mean of residues: 0.23492

Max.No of cycles: 50

Correlation coefficient: 0.996945

Rel. precision: 0.001000

Durbin-Watson Value: 0.183

t-critical(0.95;88): 1.978

Durbin-Watson Factor: 2.394

## F-TEST ON FIT-QUALITY

| #  | Code | Fexp  | Fcrit(0.95) | f-act | Type 1 | Type 2 | Type 3 | Type 4 | Type 5 | Type 6 |
|----|------|-------|-------------|-------|--------|--------|--------|--------|--------|--------|
| 0  | s:   | 1.00  | 1.43        | 87    | Cn B   |        |        |        |        |        |
| 1  | s:   | 1.14  | 1.43        | 88    | Fn     |        |        |        |        |        |
| 2  | s:   | 1.29  | 1.43        | 88    | C1 B   |        |        |        |        |        |
| 3  | s:   | 1.63  | 1.42        | 89    | F2     |        |        |        |        |        |
| 4  | s:   | 1.70  | 1.42        | 89    | B1     |        |        |        |        |        |
| 5  | s:   | 2.09  | 1.43        | 88    | An     |        |        |        |        |        |
| 6  | s:   | 2.26  | 1.42        | 89    | A3     |        |        |        |        |        |
| 7  | s:   | 2.49  | 1.42        | 89    | A2     |        |        |        |        |        |
| 8  | s:   | 3.33  | 1.42        | 89    | F1     |        |        |        |        |        |
| 9  | s:   | 8.45  | 1.42        | 89    | R3     |        |        |        |        |        |
| 10 | s:   | 9.58  | 1.42        | 89    | D1F    |        |        |        |        |        |
| 11 | s:   | 10.06 | 1.42        | 89    | D3F    |        |        |        |        |        |
| 12 | s:   | 10.72 | 1.42        | 89    | D3     |        |        |        |        |        |
| 13 | s:   | 13.52 | 1.42        | 89    | R2     |        |        |        |        |        |
| 14 | s:   | 19.06 | 1.42        | 89    | D4     |        |        |        |        |        |
| 15 | s:   | 25.36 | 1.42        | 89    | D2     |        |        |        |        |        |
| 16 | s:   | 46.62 | 1.42        | 89    | D1     |        |        |        |        |        |

# Sample 15 / cycle 4 / Fn

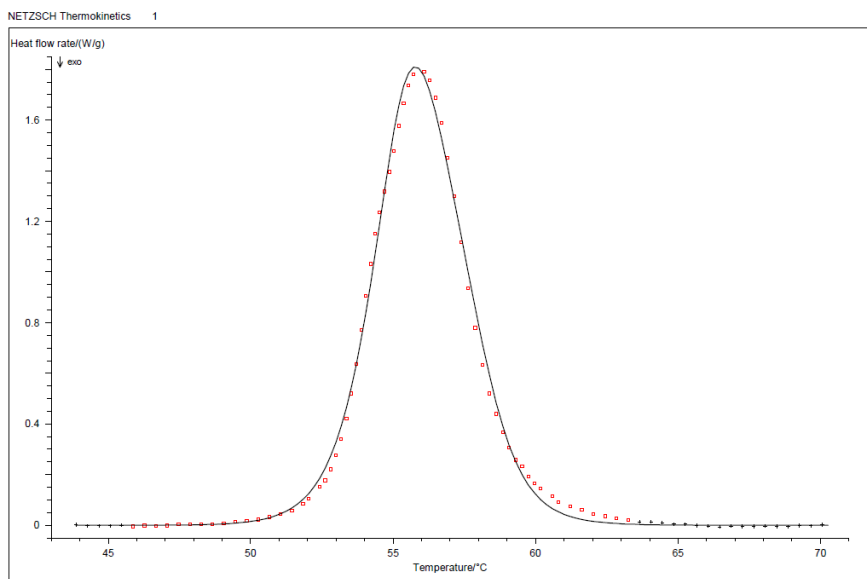

## NETZSCH Thermokinetics

Date/Time: 30.11.2016 at 13:21

Project: 1

Model 1: n-th order with autocatalysis by B

A—1→B

Start evaluation: 0.00050

Measurement type: DSC

Fine evaluation: 0.99950

SCAN 1

Identity:

OP320 11.04.2016 14:04:20/Segm.S1/1

Transfer Corr: 204 F1.kcr

Min. Temp/°C: 43.8720

Min. Time/min: 0.0

Max. Temp/°C: 70.2618

Max. Time/min: 2.9519

Heating rate/(K/min): 8.940

Sampling time/s: 1.342

Sample mass/mg: 2.800

Base line type:

LeftPts: 25

RightPts: 35

## PARAMETERS AND STANDARD DEVIATIONS

| # | Parameter              | Initial Val. | Optimum Val. | Minimum | Maximum | Sign | t*Std.Dev. |
|---|------------------------|--------------|--------------|---------|---------|------|------------|
| 0 | log A1/s <sup>-1</sup> | 78.8448      | 145.4079     |         |         |      | 3.1815E-2  |
| 1 | E1 kJ/mol              | 505.1724     | 921.4108     |         |         | +    | 0.6604     |
| 2 | React.ord. 1           | 1.5509       | 2.0786       |         |         | +    | 0.2202     |
| 3 | log Kcat 1             | 0.4500       | -0.1854      |         |         |      | 0.2239     |
| 4 | Area 1/(J/g)           | 50.9071      | 50.9071      |         |         |      | constant   |

## STATISTICS

|                          |          |                      |          |
|--------------------------|----------|----------------------|----------|
| Least squares:           | 4.36462  | Number of cycles:    | 21       |
| Mean of residues:        | 0.18115  | Max.No of cycles:    | 50       |
| Correlation coefficient: | 0.998004 | Rel. precision:      | 0.001000 |
| Durbin-Watson Value:     | 0.180    | t-critical(0.95;84): | 1.980    |
| Durbin-Watson Factor:    | 2.414    |                      |          |

## F-TEST ON FIT-QUALITY

| #  | Code | Fexp  | Fcrit(0.95) | f-act | Type 1 | Type 2 | Type 3 | Type 4 | Type 5 | Type 6 |
|----|------|-------|-------------|-------|--------|--------|--------|--------|--------|--------|
| 0  | s:   | 1.00  | 1.44        | 84    | Cn B   |        |        |        |        |        |
| 1  | s:   | 1.11  | 1.43        | 86    | F2     |        |        |        |        |        |
| 2  | s:   | 1.11  | 1.44        | 85    | Fn     |        |        |        |        |        |
| 3  | s:   | 1.26  | 1.43        | 86    | B1     |        |        |        |        |        |
| 4  | s:   | 1.28  | 1.44        | 85    | C1 B   |        |        |        |        |        |
| 5  | s:   | 4.81  | 1.44        | 85    | An     |        |        |        |        |        |
| 6  | s:   | 5.54  | 1.43        | 86    | A3     |        |        |        |        |        |
| 7  | s:   | 6.16  | 1.43        | 86    | A2     |        |        |        |        |        |
| 8  | s:   | 7.97  | 1.43        | 86    | F1     |        |        |        |        |        |
| 9  | s:   | 17.08 | 1.43        | 86    | R3     |        |        |        |        |        |
| 10 | s:   | 19.06 | 1.43        | 86    | D1F    |        |        |        |        |        |
| 11 | s:   | 20.01 | 1.43        | 86    | D3F    |        |        |        |        |        |
| 12 | s:   | 20.90 | 1.43        | 86    | D3     |        |        |        |        |        |
| 13 | s:   | 25.08 | 1.43        | 86    | R2     |        |        |        |        |        |
| 14 | s:   | 33.36 | 1.43        | 86    | D4     |        |        |        |        |        |
| 15 | s:   | 46.52 | 1.43        | 86    | D2     |        |        |        |        |        |
| 16 | s:   | 72.97 | 1.43        | 86    | D1     |        |        |        |        |        |

# Sample 15 / cycle 5 / Fn

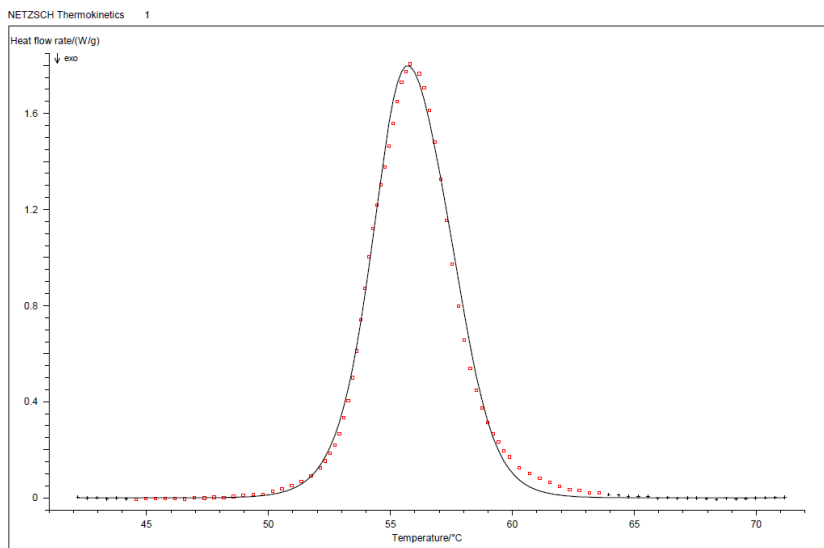

## NETZSCH Thermokinetics

Date/Time: 30.11.2016 at 13:28

Project: 1  
Model 1: n-th order

A → B

Start evaluation: 0.00050  
Fine evaluation: 0.99950  
SCAN 1 Identity:  
Transfer Cor: 204\_F1.kcr  
Min. Temp/°C: 42.1778  
Max. Temp/°C: 71.1674  
Heating rate/(K/min): 8.934  
Sample mass/mg: 2.800  
Base line type:

Measurement type: DSC  
OP320 12.04.2016 10:38:01/Segm.S1/1  
Min. Time/min: 0.0  
Max. Time/min: 3.2448  
Sampling time/s: 1.343  
LeftPts: 35 RightPts: 35

## PARAMETERS AND STANDARD DEVIATIONS

| # | Parameter              | Initial Val. | Optimum Val. | Minimum | Maximum | Sign | t*Std.Dev. |
|---|------------------------|--------------|--------------|---------|---------|------|------------|
| 0 | log A1/s <sup>-1</sup> | 160.8132     | 157.6458     |         |         |      | 0.4489     |
| 1 | E1 kJ/mol              | 1017.5484    | 997.6283     |         |         | +    | 2.8708     |
| 2 | React.ord. 1           | 2.1084       | 2.0226       |         |         | +    | 8.3578E-2  |
| 3 | Area 1/(J/g)           | 51.1202      | 51.1202      |         |         |      | constant   |

## STATISTICS

Least squares: 4.71062  
Mean of residues: 0.17962  
Correlation coefficient: 0.997750  
Durbin-Watson Value: 0.149  
Durbin-Watson Factor: 2.644

Number of cycles: 7  
Max.No of cycles: 50  
Rel. precision: 0.001000  
t-critical(0.95;95): 1.976

## F-TEST ON FIT-QUALITY

| #  | Code | Fexp  | Fcrit(0.95) | f-act | Type 1 | Type 2 | Type 3 | Type 4 | Type 5 | Type 6 |
|----|------|-------|-------------|-------|--------|--------|--------|--------|--------|--------|
| 0  | s:   | 1.00  | 1.41        | 94    | Cn B   |        |        |        |        |        |
| 1  | s:   | 1.17  | 1.41        | 96    | F2     |        |        |        |        |        |
| 2  | s:   | 1.18  | 1.41        | 95    | Fn     |        |        |        |        |        |
| 3  | s:   | 1.21  | 1.41        | 96    | B1     |        |        |        |        |        |
| 4  | s:   | 1.25  | 1.41        | 95    | C1 B   |        |        |        |        |        |
| 5  | s:   | 5.16  | 1.41        | 95    | An     |        |        |        |        |        |
| 6  | s:   | 5.59  | 1.41        | 96    | A3     |        |        |        |        |        |
| 7  | s:   | 6.09  | 1.41        | 96    | A2     |        |        |        |        |        |
| 8  | s:   | 7.84  | 1.41        | 96    | F1     |        |        |        |        |        |
| 9  | s:   | 16.85 | 1.41        | 96    | R3     |        |        |        |        |        |
| 10 | s:   | 18.68 | 1.41        | 96    | D1F    |        |        |        |        |        |
| 11 | s:   | 19.74 | 1.41        | 96    | D3F    |        |        |        |        |        |
| 12 | s:   | 20.73 | 1.41        | 96    | D3     |        |        |        |        |        |
| 13 | s:   | 24.50 | 1.41        | 96    | R2     |        |        |        |        |        |
| 14 | s:   | 33.53 | 1.41        | 96    | D4     |        |        |        |        |        |
| 15 | s:   | 44.47 | 1.41        | 96    | D2     |        |        |        |        |        |
| 16 | s:   | 73.77 | 1.41        | 96    | D1     |        |        |        |        |        |

# Sample 15 / cycle 6 / Fn

NETZSCH Thermokinetics 1

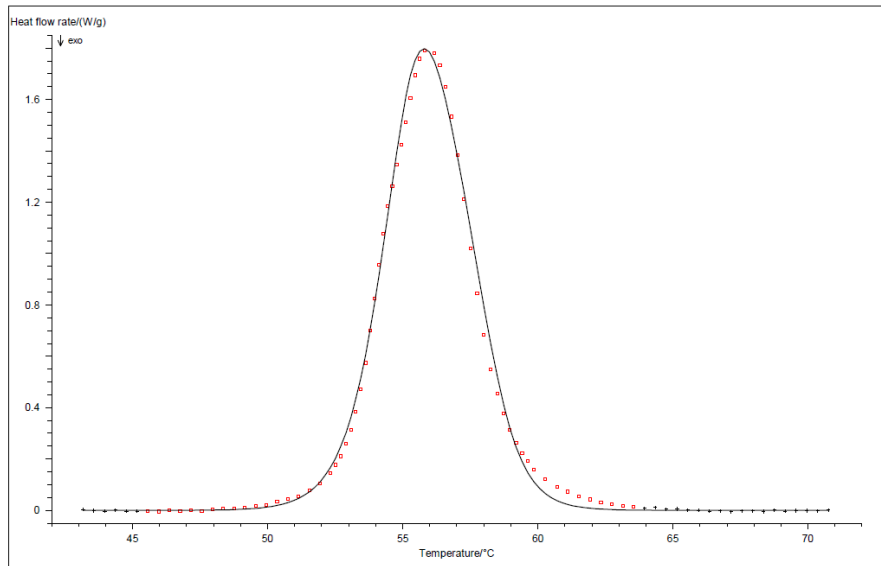

## NETZSCH Thermokinetics

Date/Time: 30.11.2016 at 13:30

Project: 1

Model 1: n-th order

A—1→B

Start evaluation: 0.00050

Measurement type: DSC

Fine evaluation: 0.99950

SCAN 1

Identity:

OP320 12.04.2016 12:20:03/Segm.S1/3

Transfer Corr: 204 F1.kcr

Min. Temp/°C: 43.1695

Min. Time/min: 0.0

Max. Temp/°C: 70.7586

Max. Time/min: 3.0876

Heating rate/(K/min): 8.936

Sampling time/s: 1.342

Sample mass/mg: 2.800

LeftPts: 30

RightPts: 30

## PARAMETERS AND STANDARD DEVIATIONS

| # | Parameter              | Initial Val. | Optimum Val. | Minimum | Maximum | Sign | t*Std.Dev. |
|---|------------------------|--------------|--------------|---------|---------|------|------------|
| 0 | log A1/s <sup>-1</sup> | 152.6114     | 152.6114     |         |         |      | 2.7285E-2  |
| 1 | E1 kJ/mol              | 966.2781     | 966.2781     |         |         | +    | 0.3799     |
| 2 | React.ord. 1           | 1.9027       | 1.9027       |         |         | +    | 0.1811     |
| 3 | Area 1/(J/g)           | 50.6712      | 50.6712      |         |         |      | constant   |

## STATISTICS

Least squares: 4.86546

Number of cycles: 14

Mean of residues: 0.18709

Max.No of cycles: 50

Correlation coefficient: 0.997708

Rel. precision: 0.001000

Durbin-Watson Value: 0.156

t-critical(0.95;89): 1.978

Durbin-Watson Factor: 2.586

## F-TEST ON FIT-QUALITY

| #  | Code | Fexp  | Fcrit(0.95) | f-act | Type 1 | Type 2 | Type 3 | Type 4 | Type 5 | Type 6 |
|----|------|-------|-------------|-------|--------|--------|--------|--------|--------|--------|
| 0  | s:   | 1.00  | 1.43        | 88    | Cn B   |        |        |        |        |        |
| 1  | s:   | 1.16  | 1.42        | 89    | Fn     |        |        |        |        |        |
| 2  | s:   | 1.18  | 1.42        | 90    | F2     |        |        |        |        |        |
| 3  | s:   | 1.28  | 1.42        | 89    | C1 B   |        |        |        |        |        |
| 4  | s:   | 1.33  | 1.42        | 90    | B1     |        |        |        |        |        |
| 5  | s:   | 4.24  | 1.42        | 89    | An     |        |        |        |        |        |
| 6  | s:   | 4.64  | 1.42        | 90    | A3     |        |        |        |        |        |
| 7  | s:   | 5.13  | 1.42        | 90    | A2     |        |        |        |        |        |
| 8  | s:   | 6.70  | 1.42        | 90    | F1     |        |        |        |        |        |
| 9  | s:   | 15.12 | 1.42        | 90    | R3     |        |        |        |        |        |
| 10 | s:   | 16.92 | 1.42        | 90    | D1F    |        |        |        |        |        |
| 11 | s:   | 17.80 | 1.42        | 90    | D3F    |        |        |        |        |        |
| 12 | s:   | 18.76 | 1.42        | 90    | D3     |        |        |        |        |        |
| 13 | s:   | 22.13 | 1.42        | 90    | R2     |        |        |        |        |        |
| 14 | s:   | 30.61 | 1.42        | 90    | D4     |        |        |        |        |        |
| 15 | s:   | 42.19 | 1.42        | 90    | D2     |        |        |        |        |        |
| 16 | s:   | 71.39 | 1.42        | 90    | D1     |        |        |        |        |        |

# Sample 15 / cycle 7 / Fn

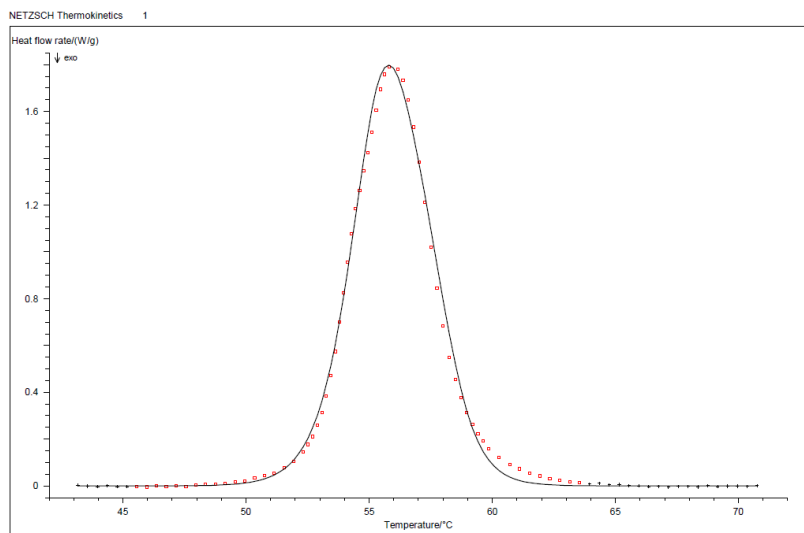

## NETZSCH Thermokinetics

Date/Time: 30.11.2016 at 13:35

Project: 1  
Model 1: n-th order

A—1→B

Start evaluation: 0.00050  
Fine evaluation: 0.99950  
SCAN 1 Identity:  
Transfer Corr: 204 F1.kcr  
Min. Temp/°C: 43.1695  
Max. Temp/°C: 70.7586  
Heating rate/(K/min): 8.936  
Sample mass/mg: 2.800  
Base line type:

Measurement type: DSC  
OP320 12.04.2016 12:20:03/Segm.S1/3  
Min. Time/min: 0.0  
Max. Time/min: 3.0876  
Sampling time/s: 1.342  
LeftPts: 30 RightPts: 30

## PARAMETERS AND STANDARD DEVIATIONS

| # | Parameter              | Initial Val. | Optimum Val. | Minimum | Maximum | Sign | t*Std.Dev. |
|---|------------------------|--------------|--------------|---------|---------|------|------------|
| 0 | log A1/s <sup>-1</sup> | 157.9722     | 152.6114     |         |         |      | 0.4996     |
| 1 | E1 kJ/mol              | 999.9923     | 966.2781     |         |         | +    | 3.1970     |
| 2 | React.ord. 1           | 1.9940       | 1.9027       |         |         | +    | 8.7621E-2  |
| 3 | Area 1/(J/g)           | 50.6712      | 50.6712      |         |         |      | constant   |

## STATISTICS

Least squares: 4.86546 Number of cycles: 8  
Mean of residues: 0.18709 Max.No of cycles: 50  
Correlation coefficient: 0.997708 Rel. precision: 0.001000  
Durbin-Watson Value: 0.156 t-critical(0.95;89): 1.978  
Durbin-Watson Factor: 2.586

## F-TEST ON FIT-QUALITY

| #  | Code | Fexp  | Fcrit(0.95) | f-act | Type 1 | Type 2 | Type 3 | Type 4 | Type 5 | Type 6 |
|----|------|-------|-------------|-------|--------|--------|--------|--------|--------|--------|
| 0  | s:   | 1.00  | 1.43        | 88    | Cn B   |        |        |        |        |        |
| 1  | s:   | 1.16  | 1.42        | 89    | Fn     |        |        |        |        |        |
| 2  | s:   | 1.18  | 1.42        | 90    | F2     |        |        |        |        |        |
| 3  | s:   | 1.28  | 1.42        | 89    | C1 B   |        |        |        |        |        |
| 4  | s:   | 1.33  | 1.42        | 90    | B1     |        |        |        |        |        |
| 5  | s:   | 4.24  | 1.42        | 89    | An     |        |        |        |        |        |
| 6  | s:   | 4.64  | 1.42        | 90    | A3     |        |        |        |        |        |
| 7  | s:   | 5.13  | 1.42        | 90    | A2     |        |        |        |        |        |
| 8  | s:   | 6.70  | 1.42        | 90    | F1     |        |        |        |        |        |
| 9  | s:   | 15.12 | 1.42        | 90    | R3     |        |        |        |        |        |
| 10 | s:   | 16.92 | 1.42        | 90    | D1F    |        |        |        |        |        |
| 11 | s:   | 17.80 | 1.42        | 90    | D3F    |        |        |        |        |        |
| 12 | s:   | 18.76 | 1.42        | 90    | D3     |        |        |        |        |        |
| 13 | s:   | 22.13 | 1.42        | 90    | R2     |        |        |        |        |        |
| 14 | s:   | 30.61 | 1.42        | 90    | D4     |        |        |        |        |        |
| 15 | s:   | 42.19 | 1.42        | 90    | D2     |        |        |        |        |        |
| 16 | s:   | 71.39 | 1.42        | 90    | D1     |        |        |        |        |        |

# Sample 18 / cycle 2 / Fn

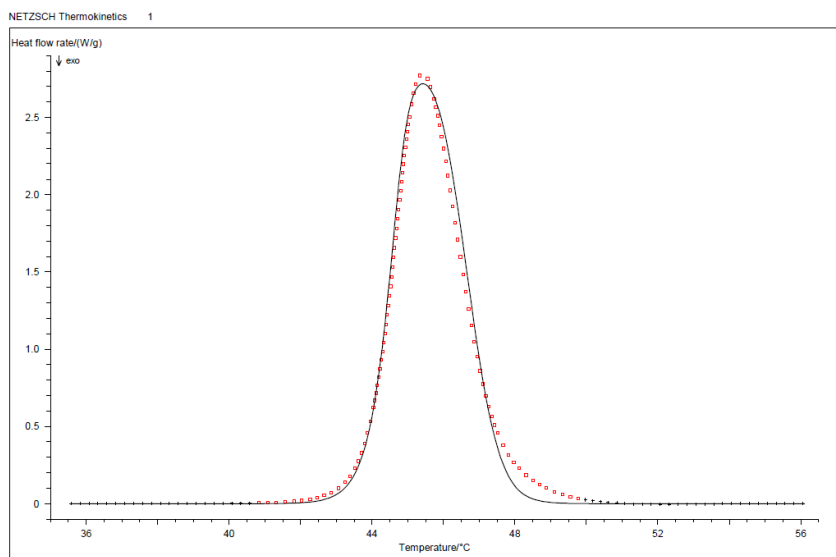

## NETZSCH Thermokinetics

Date/Time: 30.11.2016 at 16:06

Project: 1

Model 1: n-th order

A—1→B

Start evaluation: 0.00050

Measurement type: DSC

Fine evaluation: 0.99950

SCAN 1 Identity:

OP320 27.05.2016 11:00:44/Segm.S1/3

Transfer Corr: 204 F1.kcr

Min. Temp/°C: 35.5835

Min. Time/min: 0.0

Max. Temp/°C: 56.1072

Max. Time/min: 2.2997

Heating rate/(K/min): 8.925

Sampling time/s: 0.336

Sample mass/mg: 3.360

Base line type:

LeftPts: 9

RightPts: 10

## PARAMETERS AND STANDARD DEVIATIONS

| # | Parameter              | Initial Val. | Optimum Val. | Minimum | Maximum | Sign | t*Std.Dev. |
|---|------------------------|--------------|--------------|---------|---------|------|------------|
| 0 | log A1/s <sup>-1</sup> | 318.9720     | 318.9720     |         |         |      | 1.1533E-2  |
| 1 | E1 kJ/mol              | 1948.4247    | 1948.4247    |         |         | +    | 0.1394     |
| 2 | React.ord. 1           | 1.9923       | 1.9923       |         |         | +    | 6.1883E-2  |
| 3 | Area 1/(J/g)           | 52.0084      | 52.0084      |         |         |      | constant   |

## STATISTICS

Least squares: 14.78676

Number of cycles: 12

Mean of residues: 0.18945

Max.No of cycles: 50

Correlation coefficient: 0.996398

Rel. precision: 0.001000

Durbin-Watson Value: 0.014

t-critical(0.95;183): 1.964

Durbin-Watson Factor: 8.503

## F-TEST ON FIT-QUALITY

| #  | Code | Fexp   | Fcrit(0.95) | f-act | Type 1 | Type 2 | Type 3 | Type 4 | Type 5 | Type 6 |
|----|------|--------|-------------|-------|--------|--------|--------|--------|--------|--------|
| 0  | s:   | 1.00   | 1.28        | 182   | Cn B   |        |        |        |        |        |
| 1  | s:   | 2.89   | 1.28        | 183   | C1 B   |        |        |        |        |        |
| 2  | s:   | 3.58   | 1.28        | 184   | F2     |        |        |        |        |        |
| 3  | s:   | 3.60   | 1.28        | 183   | Fn     |        |        |        |        |        |
| 4  | s:   | 4.29   | 1.28        | 184   | B1     |        |        |        |        |        |
| 5  | s:   | 5.07   | 1.28        | 183   | An     |        |        |        |        |        |
| 6  | s:   | 5.41   | 1.28        | 184   | A3     |        |        |        |        |        |
| 7  | s:   | 7.26   | 1.28        | 184   | A2     |        |        |        |        |        |
| 8  | s:   | 17.35  | 1.28        | 184   | F1     |        |        |        |        |        |
| 9  | s:   | 36.63  | 1.28        | 184   | R3     |        |        |        |        |        |
| 10 | s:   | 46.87  | 1.28        | 184   | D1F    |        |        |        |        |        |
| 11 | s:   | 52.48  | 1.28        | 184   | R2     |        |        |        |        |        |
| 12 | s:   | 56.72  | 1.28        | 184   | D3F    |        |        |        |        |        |
| 13 | s:   | 62.29  | 1.28        | 184   | D3     |        |        |        |        |        |
| 14 | s:   | 96.77  | 1.28        | 184   | D4     |        |        |        |        |        |
| 15 | s:   | 116.97 | 1.28        | 184   | D2     |        |        |        |        |        |
| 16 | s:   | 174.48 | 1.28        | 184   | D1     |        |        |        |        |        |
| 17 | s:   | 439.66 | 1.26        | 223   | Bna    |        |        |        |        |        |

# Sample 18 / cycle 3 / Fn

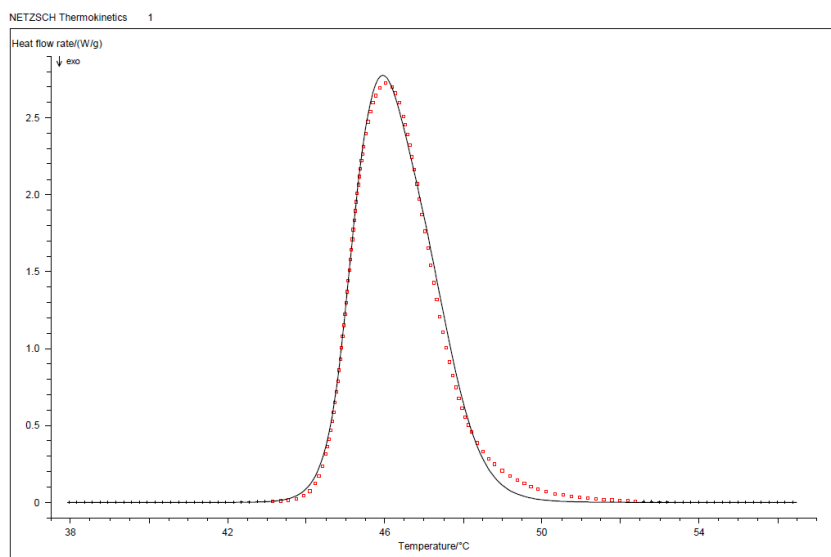

## NETZSCH Thermokinetics

Date/Time: 30.11.2016 at 16:08

Project: 1  
Model 1: n-th order

A—1→B

Start evaluation: 0.00050  
Fine evaluation: 0.99950  
SCAN 1 Identity: 204\_F1.kcr  
Transfer Corr: 37.9569  
Min. Temp/°C: 56.4834  
Max. Temp/°C: 8.909  
Heating rate/(K/min): 3.360  
Sample mass/mg:  
Base line type:

Measurement type: DSC  
OP320 30.05.2016 11:22:18/Segm.S1/3  
Min. Time/min: 0.0  
Max. Time/min: 2.0795  
Sampling time/s: 0.336  
LeftPts: 25 RightPts: 25

## PARAMETERS AND STANDARD DEVIATIONS

| # | Parameter              | Initial Val. | Optimum Val. | Minimum | Maximum | Sign | t*Std.Dev. |
|---|------------------------|--------------|--------------|---------|---------|------|------------|
| 0 | log A1/s <sup>-1</sup> | 367.2922     | 397.8562     |         |         |      | 1.4225E-2  |
| 1 | E1 kJ/mol              | 2246.3037    | 2432.4769    |         |         | +    | 0.1101     |
| 2 | React.ord. 1           | 2.6415       | 2.7863       |         |         | +    | 4.3993E-2  |
| 3 | Area 1/(J/g)           | 52.9368      | 52.9368      |         |         |      | constant   |

## STATISTICS

Least squares: 6.59243  
Mean of residues: 0.13312  
Correlation coefficient: 0.998617  
Durbin-Watson Value: 0.018  
Durbin-Watson Factor: 7.511

Number of cycles: 21  
Max.No of cycles: 50  
Rel. precision: 0.001000  
t-critical(0.95;185): 1.964

## F-TEST ON FIT-QUALITY

| #  | Code | Fexp   | Fcrit(0.95) | f-act | Type 1 | Type 2 | Type 3 | Type 4 | Type 5 | Type 6 |
|----|------|--------|-------------|-------|--------|--------|--------|--------|--------|--------|
| 0  | s:   | 1.00   | 1.28        | 185   | Fn     |        |        |        |        |        |
| 1  | s:   | 2.90   | 1.28        | 186   | F2     |        |        |        |        |        |
| 2  | s:   | 4.00   | 1.28        | 184   | Cn B   |        |        |        |        |        |
| 3  | s:   | 5.70   | 1.28        | 185   | C1 B   |        |        |        |        |        |
| 4  | s:   | 5.73   | 1.28        | 186   | B1     |        |        |        |        |        |
| 5  | s:   | 8.08   | 1.28        | 185   | An     |        |        |        |        |        |
| 6  | s:   | 8.39   | 1.28        | 186   | A3     |        |        |        |        |        |
| 7  | s:   | 10.02  | 1.28        | 186   | A2     |        |        |        |        |        |
| 8  | s:   | 19.45  | 1.28        | 186   | F1     |        |        |        |        |        |
| 9  | s:   | 35.39  | 1.28        | 186   | R3     |        |        |        |        |        |
| 10 | s:   | 47.46  | 1.28        | 186   | D1F    |        |        |        |        |        |
| 11 | s:   | 47.48  | 1.28        | 186   | R2     |        |        |        |        |        |
| 12 | s:   | 54.49  | 1.28        | 186   | D3F    |        |        |        |        |        |
| 13 | s:   | 57.79  | 1.28        | 186   | D3     |        |        |        |        |        |
| 14 | s:   | 81.27  | 1.28        | 186   | D4     |        |        |        |        |        |
| 15 | s:   | 99.02  | 1.28        | 186   | D2     |        |        |        |        |        |
| 16 | s:   | 134.42 | 1.28        | 186   | D1     |        |        |        |        |        |
| 17 | s:   | 276.93 | 1.26        | 223   | Bna    |        |        |        |        |        |

# Sample 19 / cycle 1 / Fn

NETZSCH Thermokinetics 1

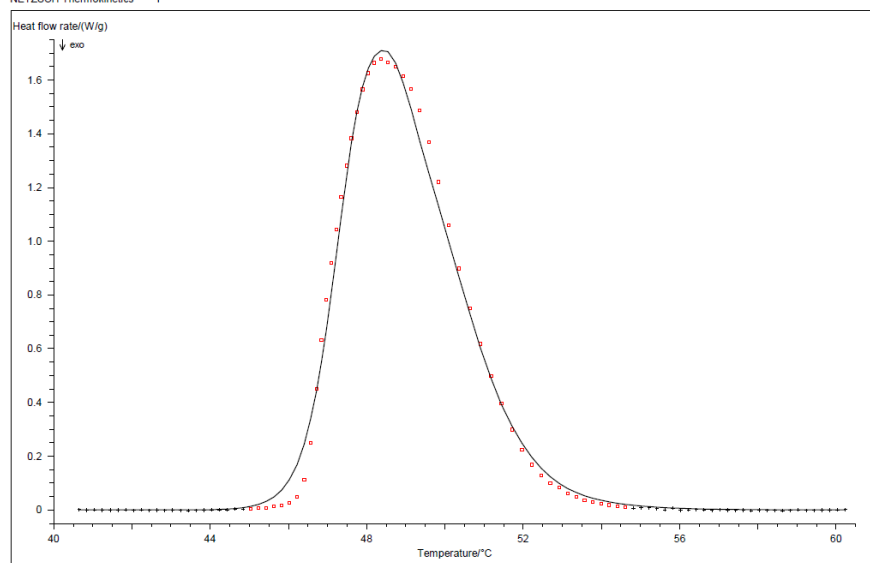

NETZSCH Thermokinetics

Date/Time: 30.11.2016 at 13:37

Project: 1

Model 1: n-th order

A → B

Start evaluation: 0.00050

Measurement type: DSC

Fine evaluation: 0.99950

SCAN 1 Identity: 204\_F1.kcr OP320 14.04.2016 13:48:15/Segm.S1/3

Transfer Corr: 0.00050

Min. Temp/°C: 40.6485

Min. Time/min: 0.0

Max. Temp/°C: 60.2333

Max. Time/min: 2.1924

Heating rate/(K/min): 8.933

Sampling time/s: 1.342

Sample mass/mg: 4.660

Base line type: LeftPts: 25 RightPts: 25

## PARAMETERS AND STANDARD DEVIATIONS

| # | Parameter              | Initial Val. | Optimum Val. | Minimum | Maximum | Sign | t*Std.Dev. |
|---|------------------------|--------------|--------------|---------|---------|------|------------|
| 0 | log A1/s <sup>-1</sup> | 194.2286     | 296.5000     |         |         |      | 3.7808E-2  |
| 1 | E1 kJ/mol              | 1200.2375    | 1827.4645    |         |         | +    | 0.5466     |
| 2 | React.ord. 1           | 2.3132       | 3.5589       |         |         | +    | 0.3272     |
| 3 | Area 1/(J/g)           | 43.2735      | 43.2735      |         |         |      | constant   |

## STATISTICS

|                          |          |                      |          |
|--------------------------|----------|----------------------|----------|
| Least squares:           | 7.56068  | Number of cycles:    | 20       |
| Mean of residues:        | 0.27635  | Max.No of cycles:    | 50       |
| Correlation coefficient: | 0.995983 | Rel. precision:      | 0.001000 |
| Durbin-Watson Value:     | 0.212    | t-critical(0.95;46): | 2.004    |
| Durbin-Watson Factor:    | 2.232    |                      |          |

## F-TEST ON FIT-QUALITY

| #  | Code | Fexp  | Fcrit(0.95) | f-act | Type 1 | Type 2 | Type 3 | Type 4 | Type 5 | Type 6 |
|----|------|-------|-------------|-------|--------|--------|--------|--------|--------|--------|
| 0  | s:   | 1.00  | 1.64        | 46    | Fn     |        |        |        |        |        |
| 1  | s:   | 1.51  | 1.64        | 45    | Ch B   |        |        |        |        |        |
| 2  | s:   | 3.12  | 1.64        | 46    | C1 B   |        |        |        |        |        |
| 3  | s:   | 3.37  | 1.63        | 47    | B1     |        |        |        |        |        |
| 4  | s:   | 3.38  | 1.63        | 47    | F2     |        |        |        |        |        |
| 5  | s:   | 4.82  | 1.64        | 46    | An     |        |        |        |        |        |
| 6  | s:   | 8.20  | 1.63        | 47    | A2     |        |        |        |        |        |
| 7  | s:   | 12.72 | 1.63        | 47    | F1     |        |        |        |        |        |
| 8  | s:   | 20.46 | 1.63        | 47    | R3     |        |        |        |        |        |
| 9  | s:   | 24.77 | 1.63        | 47    | D1F    |        |        |        |        |        |
| 10 | s:   | 25.77 | 1.63        | 47    | R2     |        |        |        |        |        |
| 11 | s:   | 26.31 | 1.63        | 47    | A3     |        |        |        |        |        |
| 12 | s:   | 27.13 | 1.63        | 47    | D3F    |        |        |        |        |        |
| 13 | s:   | 27.94 | 1.63        | 47    | D3     |        |        |        |        |        |
| 14 | s:   | 37.04 | 1.63        | 47    | D4     |        |        |        |        |        |
| 15 | s:   | 43.33 | 1.63        | 47    | D2     |        |        |        |        |        |
| 16 | s:   | 59.79 | 1.63        | 47    | D1     |        |        |        |        |        |

## Sample 19 / cycle 2 / Fn

NETZSCH Thermokinetics

Date/Time: 30.11.2016 at 13:40

Project: 1

Model 1: n-th order

A-1→B

Start evaluation: 0.00050

Measurement type: DSC

Fine evaluation: 0.99950

SCAN 1

Identity:

OP320 14.04.2016 15:04:45/Segm.S1/3

Transfer Corr: 204\_F1.kcr

Min. Temp/°C: 36.3948

Min. Time/min: 0.0

Max. Temp/°C: 57.7620

Max. Time/min: 2.3946

Heating rate/(K/min): 8.923

Sampling time/s: 1.343

Sample mass/mg: 4.660

Base line type:

LeftPts: 25

RightPts: 25

## PARAMETERS AND STANDARD DEVIATIONS

| # | Parameter              | Initial Val. | Optimum Val. | Minimum | Maximum | Sign | t*Std.Dev. |
|---|------------------------|--------------|--------------|---------|---------|------|------------|
| 0 | log A1/s <sup>-1</sup> | 476.8918     | 322.1788     |         |         |      | 0.1323     |
| 1 | E1 kJ/mol              | 2912.3566    | 1970.4791    |         |         | +    | 0.8821     |
| 2 | React.ord. 1           | 4.4001       | 2.8594       |         |         | +    | 0.1316     |
| 3 | Area 1/(J/g)           | 46.6758      | 46.6758      |         |         |      | constant   |

## STATISTICS

|                          |          |                      |          |
|--------------------------|----------|----------------------|----------|
| Least squares:           | 6.48893  | Number of cycles:    | 11       |
| Mean of residues:        | 0.24512  | Max.No of cycles:    | 50       |
| Correlation coefficient: | 0.997200 | Rel. precision:      | 0.001000 |
| Durbin-Watson Value:     | 0.965    | t-critical(0.95;42): | 2.009    |
| Durbin-Watson Factor:    | 1.169    |                      |          |

## F-TEST ON FIT-QUALITY

| #  | Code | Fexp   | Fcrit(0.95) | f-act | Type 1 | Type 2 | Type 3 | Type 4 | Type 5 | Type 6 |
|----|------|--------|-------------|-------|--------|--------|--------|--------|--------|--------|
| 0  | s:   | 1.00   | 1.69        | 41    | Cn B   |        |        |        |        |        |
| 1  | s:   | 1.02   | 1.68        | 42    | Fn     |        |        |        |        |        |
| 2  | s:   | 2.31   | 1.67        | 43    | F2     |        |        |        |        |        |
| 3  | s:   | 2.65   | 1.68        | 42    | C1 B   |        |        |        |        |        |
| 4  | s:   | 2.81   | 1.67        | 43    | B1     |        |        |        |        |        |
| 5  | s:   | 4.25   | 1.68        | 42    | An     |        |        |        |        |        |
| 6  | s:   | 5.91   | 1.67        | 43    | A2     |        |        |        |        |        |
| 7  | s:   | 12.21  | 1.67        | 43    | F1     |        |        |        |        |        |
| 8  | s:   | 21.41  | 1.67        | 43    | R3     |        |        |        |        |        |
| 9  | s:   | 28.30  | 1.67        | 43    | R2     |        |        |        |        |        |
| 10 | s:   | 29.01  | 1.67        | 43    | D1F    |        |        |        |        |        |
| 11 | s:   | 34.16  | 1.67        | 43    | D3F    |        |        |        |        |        |
| 12 | s:   | 35.66  | 1.67        | 43    | D3     |        |        |        |        |        |
| 13 | s:   | 50.56  | 1.67        | 43    | D4     |        |        |        |        |        |
| 14 | s:   | 55.25  | 1.67        | 43    | D2     |        |        |        |        |        |
| 15 | s:   | 79.88  | 1.67        | 43    | D1     |        |        |        |        |        |
| 16 | s:   | 362.45 | 1.67        | 43    | A3     |        |        |        |        |        |

# Sample 19 / cycle 3 / Fn

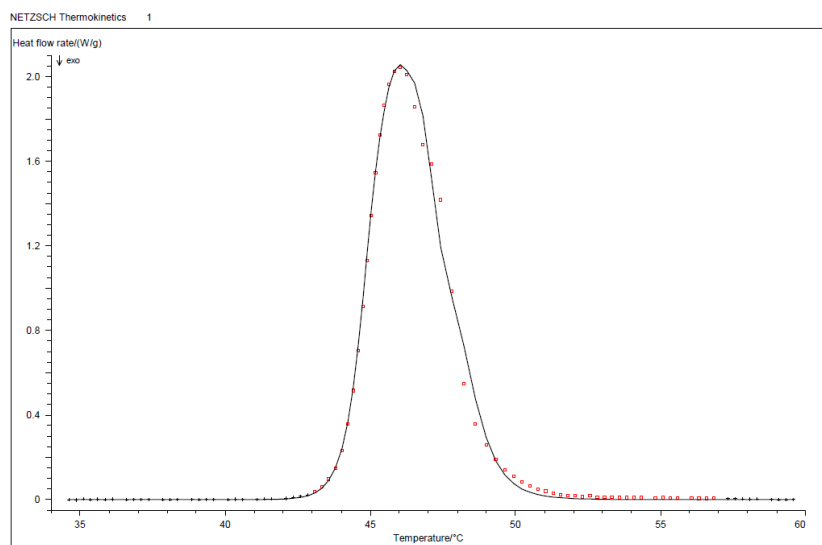

## NETZSCH Thermokinetics

Date/Time: 30.11.2016 at 13:42

Project: 1  
Model 1: n-th order

A-1→B

Start evaluation: 0.00050  
Fine evaluation: 0.99950  
SCAN 1 Identity:  
Transfer Cor: 204\_F1.kcr  
Min. Temp/°C: 34.6119  
Max. Temp/°C: 59.5753  
Heating rate/(K/min): 8.927  
Sample mass/mg: 4.660  
Base line type:

Measurement type: DSC  
OP320 14.04.2016 16:11:03/Segm.S1/3  
Min. Time/min: 0.0  
Max. Time/min: 2.7964  
Sampling time/s: 1.678  
LeftPts: 25 RightPts: 25

## PARAMETERS AND STANDARD DEVIATIONS

| # | Parameter              | Initial Val. | Optimum Val. | Minimum | Maximum | Sign | t*Std.Dev. |
|---|------------------------|--------------|--------------|---------|---------|------|------------|
| 0 | log A1/s <sup>-1</sup> | 483.7347     | 303.1342     |         |         |      | 3.1344E-2  |
| 1 | E1 kJ/mol              | 2953.7593    | 1854.4685    |         |         | +    | 0.6480     |
| 2 | React.ord. 1           | 4.8918       | 2.8607       |         |         | +    | 0.3543     |
| 3 | Area 1/(J/g)           | 47.7439      | 47.7439      |         |         |      | constant   |

## STATISTICS

Least squares: 7.14956 Number of cycles: 23  
Mean of residues: 0.26606 Max.No of cycles: 50  
Correlation coefficient: 0.997324 Rel. precision: 0.001000  
Durbin-Watson Value: 1.149 t-critical(0.95;54): 1.996  
Durbin-Watson Factor: 1.105

## F-TEST ON FIT-QUALITY

| #  | Code | Fexp  | Fcrit(0.95) | f-act | Type 1 | Type 2 | Type 3 | Type 4 | Type 5 | Type 6 |
|----|------|-------|-------------|-------|--------|--------|--------|--------|--------|--------|
| 0  | s:   | 1.00  | 1.57        | 54    | Fn     |        |        |        |        |        |
| 1  | s:   | 1.02  | 1.58        | 53    | Cn B   |        |        |        |        |        |
| 2  | s:   | 1.93  | 1.57        | 55    | F2     |        |        |        |        |        |
| 3  | s:   | 2.12  | 1.57        | 54    | C1 B   |        |        |        |        |        |
| 4  | s:   | 2.20  | 1.57        | 55    | B1     |        |        |        |        |        |
| 5  | s:   | 3.55  | 1.57        | 54    | An     |        |        |        |        |        |
| 6  | s:   | 4.56  | 1.57        | 55    | A2     |        |        |        |        |        |
| 7  | s:   | 8.97  | 1.57        | 55    | F1     |        |        |        |        |        |
| 8  | s:   | 15.54 | 1.57        | 55    | R3     |        |        |        |        |        |
| 9  | s:   | 19.70 | 1.57        | 55    | R2     |        |        |        |        |        |
| 10 | s:   | 20.82 | 1.57        | 55    | D1F    |        |        |        |        |        |
| 11 | s:   | 24.38 | 1.57        | 55    | D3F    |        |        |        |        |        |
| 12 | s:   | 25.01 | 1.57        | 55    | D3     |        |        |        |        |        |
| 13 | s:   | 33.65 | 1.57        | 55    | D4     |        |        |        |        |        |
| 14 | s:   | 39.05 | 1.57        | 55    | D2     |        |        |        |        |        |
| 15 | s:   | 59.90 | 1.57        | 55    | D1     |        |        |        |        |        |
| 16 | s:   | 90.10 | 1.57        | 55    | A3     |        |        |        |        |        |
